# Supplementary material
Source: MDPI journal article supplement (https://www.mdpi.com/2073-4352/10/10/894)

# checkCIF/PLATON report

Structure factors have been supplied for datablock(s) SQ1820, SQDH2020

THIS REPORT IS FOR GUIDANCE ONLY. IF USED AS PART OF A REVIEW PROCEDURE FOR PUBLICATION, IT SHOULD NOT REPLACE THE EXPERTISE OF AN EXPERIENCED CRYSTALLOGRAPHIC REFEREE.

No syntax errors found.      CIF dictionary      Interpreting this report

## Datablock: SQ1820

---

Bond precision:    C-C = 0.0004 Å                      Wavelength=0.71073

Cell:                      a=15.072(2)              b=7.9873(9)              c=6.8410(9)  
                                alpha=90              beta=90              gamma=90  
Temperature:              18 K

|                | Calculated   | Reported     |
|----------------|--------------|--------------|
| Volume         | 823.55(18)   | 823.55(18)   |
| Space group    | P b c n      | P b c n      |
| Hall group     | -P 2n 2ab    | -P 2n 2ab    |
| Moiety formula | C8 H12 N2 O2 | C8 H12 N2 O2 |
| Sum formula    | C8 H12 N2 O2 | C8 H12 N2 O2 |
| Mr             | 168.20       | 168.20       |
| Dx,g cm-3      | 1.357        | 1.357        |
| Z              | 4            | 4            |
| Mu (mm-1)      | 0.099        | 0.099        |
| F000           | 360.0        | 360.0        |
| F000'          | 360.16       |              |
| h,k,lmax       | 34,18,15     | 34,18,15     |
| Nref           | 5162         | 5163         |
| Tmin,Tmax      | 0.963,0.976  | 0.970,0.979  |
| Tmin'          | 0.963        |              |

Correction method= # Reported T Limits: Tmin=0.970 Tmax=0.979  
AbsCorr = NONE

Data completeness= 1.000                      Theta(max)= 54.394

R(reflections)= 0.0314( 4340)              wR2(reflections)= 0.0989( 5163)

S = 1.113                      Npar= 56

---

The following ALERTS were generated. Each ALERT has the format  
**test-name\_ALERT\_alert-type\_alert-level**.  
Click on the hyperlinks for more details of the test.

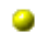

### Alert level C

CELLK01\_ALERT\_1\_C Check that the cell measurement temperature is in Kelvin.  
Value of measurement temperature given = 18.000

**Author Response: That's correct. The data collection was performed at 18(1) K.**

DIFMX02\_ALERT\_1\_C The maximum difference density is  $> 0.1 \cdot Z_{\text{MAX}} \cdot 0.75$   
The relevant atom site should be identified.

**Author Response: The maximum Fourier difference is located near the C1 atom. It depends on the anisotropic features of its charge density distribution. The latter are neatly detectable with the Independent Atom Model, as this dataset was collected at 18(1) K.**

PLAT097\_ALERT\_2\_C Large Reported Max. (Positive) Residual Density 0.61 eA-3

**Author Response: The maximum Fourier difference is located near the C1 atom. It depends on the anisotropic features of its charge density distribution. The latter are neatly detectable with the Independent Atom Model, as this dataset was collected at 18(1) K.**

PLAT218\_ALERT\_3\_C Constrained U(ij) Components(s) for H4A . 6 Check

**Author Response: Anisotropic U(ij) components were estimated by ADPH (Roversi & Destro, 2004) and never refined.**

PLAT218\_ALERT\_3\_C Constrained U(ij) Components(s) for H4B . 6 Check

**Author Response: Anisotropic U(ij) components were estimated by ADPH (Roversi & Destro, 2004) and never refined.**

PLAT218\_ALERT\_3\_C Constrained U(ij) Components(s) for H4C . 6 Check

**Author Response: Anisotropic U(ij) components were estimated by ADPH (Roversi & Destro, 2004) and never refined.**

PLAT218\_ALERT\_3\_C Constrained U(ij) Components(s) for H3A . 6 Check

**Author Response: Anisotropic U(ij) components were estimated by ADPH (Roversi & Destro, 2004) and never refined.**

PLAT218\_ALERT\_3\_C Constrained U(ij) Components(s) for H3B . 6 Check

**Author Response: Anisotropic U(ij) components were estimated by ADPH (Roversi & Destro, 2004) and never refined.**

PLAT218\_ALERT\_3\_C Constrained U(ij) Components(s) for H3C . 6 Check

**Author Response: Anisotropic U(ij) components were estimated by ADPH (Roversi & Destro, 2004) and never refined.**

PLAT351\_ALERT\_3\_C Long C-H (X0.96,N1.08A) C4 - H4C . 1.11 Ang.

**Author Response: Positions of H atoms were estimated from multipole refinements with polarized basis.**

PLAT751\_ALERT\_4\_C Bond Calc 1.08000, Rep 1.0793(3) ..... Senseless s.u.  
C3 -H3A 1.555 1.555 ..... # 7 Check

**Author Response: Positions of H atoms were estimated from multipole refinements with polarized basis.**

PLAT751\_ALERT\_4\_C Bond Calc 1.09000, Rep 1.0873(3) ..... Senseless s.u.  
C3 -H3B 1.555 1.555 ..... # 8 Check

**Author Response: Positions of H atoms were estimated from multipole refinements with polarized basis.**

PLAT751\_ALERT\_4\_C Bond Calc 1.06000, Rep 1.0624(3) ..... Senseless s.u.  
C3 -H3C 1.555 1.555 ..... # 9 Check

**Author Response: Positions of H atoms were estimated from multipole refinements with polarized basis.**

PLAT751\_ALERT\_4\_C Bond Calc 1.06000, Rep 1.0624(3) ..... Senseless s.u.  
C4 -H4A 1.555 1.555 ..... # 11 Check

**Author Response: Positions of H atoms were estimated from multipole refinements with polarized basis.**

PLAT751\_ALERT\_4\_C Bond Calc 1.07000, Rep 1.0728(3) ..... Senseless s.u.  
C4 -H4B 1.555 1.555 ..... # 12 Check

**Author Response: Positions of H atoms were estimated from multipole refinements with polarized basis.**

PLAT751\_ALERT\_4\_C Bond Calc 1.11000, Rep 1.1144(3) ..... Senseless s.u.  
C4 -H4C 1.555 1.555 ..... # 13 Check

**Author Response: Positions of H atoms were estimated from multipole refinements with polarized basis.**

|                   |       |      |         |       |           |       |                |
|-------------------|-------|------|---------|-------|-----------|-------|----------------|
| PLAT752_ALERT_4_C | Angle | Calc | 110.00, | Rep   | 109.60(3) | ..... | Senseless s.u. |
| N6                | -C3   | -H3A | 1.555   | 1.555 | 1.555     | #     | 7 Check        |

**Author Response: Positions of H atoms were estimated from multipole refinements with polarized basis.**

|                   |       |      |         |       |           |       |                |
|-------------------|-------|------|---------|-------|-----------|-------|----------------|
| PLAT752_ALERT_4_C | Angle | Calc | 109.00, | Rep   | 109.39(3) | ..... | Senseless s.u. |
| N6                | -C3   | -H3B | 1.555   | 1.555 | 1.555     | #     | 8 Check        |

**Author Response: Positions of H atoms were estimated from multipole refinements with polarized basis.**

|                   |       |      |         |       |           |       |                |
|-------------------|-------|------|---------|-------|-----------|-------|----------------|
| PLAT752_ALERT_4_C | Angle | Calc | 110.00, | Rep   | 110.11(3) | ..... | Senseless s.u. |
| H3A               | -C3   | -H3B | 1.555   | 1.555 | 1.555     | #     | 9 Check        |

**Author Response: Positions of H atoms were estimated from multipole refinements with polarized basis.**

|                   |       |      |         |       |           |       |                |
|-------------------|-------|------|---------|-------|-----------|-------|----------------|
| PLAT752_ALERT_4_C | Angle | Calc | 108.00, | Rep   | 107.77(2) | ..... | Senseless s.u. |
| N6                | -C3   | -H3C | 1.555   | 1.555 | 1.555     | #     | 10 Check       |

**Author Response: Positions of H atoms were estimated from multipole refinements with polarized basis.**

|                   |       |      |         |       |           |       |                |
|-------------------|-------|------|---------|-------|-----------|-------|----------------|
| PLAT752_ALERT_4_C | Angle | Calc | 110.00, | Rep   | 109.57(3) | ..... | Senseless s.u. |
| H3A               | -C3   | -H3C | 1.555   | 1.555 | 1.555     | #     | 11 Check       |

**Author Response: Positions of H atoms were estimated from multipole refinements with polarized basis.**

|                   |       |      |         |       |           |       |                |
|-------------------|-------|------|---------|-------|-----------|-------|----------------|
| PLAT752_ALERT_4_C | Angle | Calc | 110.00, | Rep   | 110.36(3) | ..... | Senseless s.u. |
| H3B               | -C3   | -H3C | 1.555   | 1.555 | 1.555     | #     | 12 Check       |

**Author Response: Positions of H atoms were estimated from multipole refinements with polarized basis.**

|                   |       |      |         |       |           |       |                |
|-------------------|-------|------|---------|-------|-----------|-------|----------------|
| PLAT752_ALERT_4_C | Angle | Calc | 109.00, | Rep   | 109.40(2) | ..... | Senseless s.u. |
| N6                | -C4   | -H4A | 1.555   | 1.555 | 1.555     | #     | 13 Check       |

**Author Response: Positions of H atoms were estimated from multipole refinements with polarized basis.**

|                   |       |      |         |       |           |       |                |
|-------------------|-------|------|---------|-------|-----------|-------|----------------|
| PLAT752_ALERT_4_C | Angle | Calc | 110.00, | Rep   | 110.08(3) | ..... | Senseless s.u. |
| N6                | -C4   | -H4B | 1.555   | 1.555 | 1.555     | #     | 14 Check       |

**Author Response: Positions of H atoms were estimated from multipole refinements with polarized basis.**

PLAT752\_ALERT\_4\_C Angle Calc 110.00, Rep 109.53(3) ..... Senseless s.u.  
H4A -C4 -H4B 1.555 1.555 1.555 # 15 Check

**Author Response: Positions of H atoms were estimated from multipole refinements with polarized basis.**

PLAT752\_ALERT\_4\_C Angle Calc 109.00, Rep 109.00(2) ..... Senseless s.u.  
N6 -C4 -H4C 1.555 1.555 1.555 # 16 Check

**Author Response: Positions of H atoms were estimated from multipole refinements with polarized basis.**

PLAT752\_ALERT\_4\_C Angle Calc 110.00, Rep 109.86(3) ..... Senseless s.u.  
H4A -C4 -H4C 1.555 1.555 1.555 # 17 Check

**Author Response: Positions of H atoms were estimated from multipole refinements with polarized basis.**

PLAT752\_ALERT\_4\_C Angle Calc 109.00, Rep 108.97(2) ..... Senseless s.u.  
H4B -C4 -H4C 1.555 1.555 1.555 # 18 Check

**Author Response: Positions of H atoms were estimated from multipole refinements with polarized basis.**

PLAT905\_ALERT\_3\_C Negative K value in the Analysis of Variance ... -0.209 Report

**Author Response: This is a high-resolution dataset collected at 18(1) K. The problem is due to weak high-order data and is solved by applying a multipole model for the charge density analysis.**

---

#### Alert level G

PLAT066\_ALERT\_1\_G Predicted and Reported Tmin&Tmax Range Identical ? Check  
PLAT432\_ALERT\_2\_G Short Inter X...Y Contact C1 ..C1 3.17 Ang.  
1-x,y,1/2-z = 2\_655 Check  
PLAT760\_ALERT\_1\_G CIF Contains no Torsion Angles ..... ? Info  
PLAT764\_ALERT\_4\_G Overcomplete CIF Bond List Detected (Rep/Expd) . 1.17 Ratio  
PLAT941\_ALERT\_3\_G Average HKL Measurement Multiplicity ..... 1.0 Low  
PLAT978\_ALERT\_2\_G Number C-C Bonds with Positive Residual Density. 1 Info  
PLAT992\_ALERT\_5\_G Repd & Actual \_reflns\_number\_gt Values Differ by 4 Check

- 
- 0 **ALERT level A** = Most likely a serious problem - resolve or explain
  - 0 **ALERT level B** = A potentially serious problem, consider carefully
  - 29 **ALERT level C** = Check. Ensure it is not caused by an omission or oversight
  - 7 **ALERT level G** = General information/check it is not something unexpected
  
  - 4 **ALERT type 1** CIF construction/syntax error, inconsistent or missing data
  - 3 **ALERT type 2** Indicator that the structure model may be wrong or deficient
  - 9 **ALERT type 3** Indicator that the structure quality may be low
  - 19 **ALERT type 4** Improvement, methodology, query or suggestion
  - 1 **ALERT type 5** Informative message, check

---

## Datablock: SQDH2020

---

Bond precision: C-C = 0.0008 Å

Wavelength=0.71073

Cell: a=7.959(1) b=7.154(1) c=17.799(2)

alpha=90 beta=91.68(1) gamma=90

Temperature: 20 K

|                | Calculated            | Reported              |
|----------------|-----------------------|-----------------------|
| Volume         | 1013.0(2)             | 1013.0(2)             |
| Space group    | P 21/c                | P 21/c                |
| Hall group     | -P 2ybc               | -P 2ybc               |
| Moiety formula | C8 H12 N2 O2, 2(H2 O) | C8 H12 N2 O2, 2(H2 O) |
| Sum formula    | C8 H16 N2 O4          | C8 H16 N2 O4          |
| Mr             | 204.23                | 204.23                |
| Dx,g cm-3      | 1.339                 | 1.339                 |
| Z              | 4                     | 4                     |
| Mu (mm-1)      | 0.107                 | 0.107                 |
| F000           | 440.0                 | 440.0                 |
| F000'          | 440.24                |                       |
| h,k,lmax       | 18,16,40              | 18,15,38              |
| Nref           | 12822                 | 5535                  |
| Tmin,Tmax      | 0.968,0.984           | 0.968,0.984           |
| Tmin'          | 0.948                 |                       |

Correction method= # Reported T Limits: Tmin=0.968 Tmax=0.984

AbsCorr = NONE

Data completeness= 0.432

Theta(max)= 54.629

R(reflections)= 0.0305( 4873)

wR2(reflections)= 0.0867( 5535)

S = 1.052

Npar= 127

---

The following ALERTS were generated. Each ALERT has the format

**test-name\_ALERT\_alert-type\_alert-level.**

Click on the hyperlinks for more details of the test.

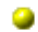

### Alert level C

CELLK01\_ALERT\_1\_C Check that the cell measurement temperature is in Kelvin.

Value of measurement temperature given = 20.000

**Author Response: That's correct. The data collection was performed at 20(1) K.**

PLAT218\_ALERT\_3\_C Constrained U(ij) Components(s) for H1 . 6 Check

**Author Response: Anisotropic U(ij) components were estimated by ADPH (Roversi & Destro, 2004) and never refined.**

PLAT218\_ALERT\_3\_C Constrained U(ij) Components(s) for H2 . 6 Check

**Author Response: Anisotropic U(ij) components were estimated by ADPH (Roversi & Destro, 2004) and never refined.**

PLAT218\_ALERT\_3\_C Constrained U(ij) Components(s) for H3 . 6 Check

**Author Response: Anisotropic U(ij) components were estimated by ADPH (Roversi & Destro, 2004) and never refined.**

PLAT218\_ALERT\_3\_C Constrained U(ij) Components(s) for H4 . 6 Check

**Author Response: Anisotropic U(ij) components were estimated by ADPH (Roversi & Destro, 2004) and never refined.**

PLAT218\_ALERT\_3\_C Constrained U(ij) Components(s) for H5 . 6 Check

**Author Response: Anisotropic U(ij) components were estimated by ADPH (Roversi & Destro, 2004) and never refined.**

PLAT218\_ALERT\_3\_C Constrained U(ij) Components(s) for H6 . 6 Check

**Author Response: Anisotropic U(ij) components were estimated by ADPH (Roversi & Destro, 2004) and never refined.**

PLAT218\_ALERT\_3\_C Constrained U(ij) Components(s) for H7 . 6 Check

**Author Response: Anisotropic U(ij) components were estimated by ADPH (Roversi & Destro, 2004) and never refined.**

PLAT218\_ALERT\_3\_C Constrained U(ij) Components(s) for H8 . 6 Check

**Author Response: Anisotropic U(ij) components were estimated by ADPH (Roversi & Destro, 2004) and never refined.**

PLAT218\_ALERT\_3\_C Constrained U(ij) Components(s) for H9 . 6 Check

**Author Response: Anisotropic U(ij) components were estimated by ADPH (Roversi & Destro, 2004) and never refined.**

PLAT218\_ALERT\_3\_C Constrained U(ij) Components(s) for H10 . 6 Check

**Author Response: Anisotropic U(ij) components were estimated by ADPH (Roversi & Destro, 2004) and never refined.**

PLAT218\_ALERT\_3\_C Constrained U(ij) Components(s) for H11 . 6 Check

**Author Response: Anisotropic U(ij) components were estimated by ADPH (Roversi & Destro, 2004) and never refined.**

PLAT218\_ALERT\_3\_C Constrained U(ij) Components(s) for H12 . 6 Check

**Author Response: Anisotropic U(ij) components were estimated by ADPH (Roversi & Destro, 2004) and never refined.**

PLAT218\_ALERT\_3\_C Constrained U(ij) Components(s) for H13 . 6 Check

**Author Response: Anisotropic U(ij) components were estimated by ADPH (Roversi & Destro, 2004) and never refined.**

PLAT218\_ALERT\_3\_C Constrained U(ij) Components(s) for H14 . 6 Check

**Author Response: Anisotropic U(ij) components were estimated by ADPH (Roversi & Destro, 2004) and never refined.**

PLAT218\_ALERT\_3\_C Constrained U(ij) Components(s) for H15 . 6 Check

**Author Response: Anisotropic U(ij) components were estimated by ADPH (Roversi & Destro, 2004) and never refined.**

PLAT218\_ALERT\_3\_C Constrained U(ij) Components(s) for H16 . 6 Check

**Author Response: Anisotropic U(ij) components were estimated by ADPH (Roversi & Destro, 2004) and never refined.**

PLAT230\_ALERT\_2\_C Hirshfeld Test Diff for O2 --C5 . 5.5 s.u.

**Author Response: This minor failure of the Hirshfeld rigid bond test is likely due to the rigid body librational motion of the C~4~ ring, but it does not hamper the accurate determination of the overall molecular charge density features.**

PLAT351\_ALERT\_3\_C Long C-H (X0.96,N1.08A) C8 - H10 . 1.11 Ang.

**Author Response: Positions of H atoms were estimated from multipole refinements with polarized basis.**

|                        |      |              |                 |                |
|------------------------|------|--------------|-----------------|----------------|
| PLAT751_ALERT_4_C Bond | Calc | 1.07000, Rep | 1.0735(6) ..... | Senseless s.u. |
| C3                     | -H1  | 1.555        | 1.555 .....     | # 8 Check      |

**Author Response: Positions of H atoms were estimated from multipole refinements with polarized basis.**

|                        |      |              |                 |                |
|------------------------|------|--------------|-----------------|----------------|
| PLAT751_ALERT_4_C Bond | Calc | 1.10000, Rep | 1.0989(6) ..... | Senseless s.u. |
| C3                     | -H2  | 1.555        | 1.555 .....     | # 9 Check      |

**Author Response: Positions of H atoms were estimated from multipole refinements with polarized basis.**

|                        |      |              |                 |                |
|------------------------|------|--------------|-----------------|----------------|
| PLAT751_ALERT_4_C Bond | Calc | 1.09000, Rep | 1.0911(6) ..... | Senseless s.u. |
| C3                     | -H3  | 1.555        | 1.555 .....     | # 10 Check     |

**Author Response: Positions of H atoms were estimated from multipole refinements with polarized basis.**

|                        |      |              |                 |                |
|------------------------|------|--------------|-----------------|----------------|
| PLAT751_ALERT_4_C Bond | Calc | 1.06000, Rep | 1.0614(6) ..... | Senseless s.u. |
| C4                     | -H4  | 1.555        | 1.555 .....     | # 11 Check     |

**Author Response: Positions of H atoms were estimated from multipole refinements with polarized basis.**

|                        |      |              |                 |                |
|------------------------|------|--------------|-----------------|----------------|
| PLAT751_ALERT_4_C Bond | Calc | 1.09000, Rep | 1.0885(6) ..... | Senseless s.u. |
| C4                     | -H5  | 1.555        | 1.555 .....     | # 12 Check     |

**Author Response: Positions of H atoms were estimated from multipole refinements with polarized basis.**

|                        |      |              |                 |                |
|------------------------|------|--------------|-----------------|----------------|
| PLAT751_ALERT_4_C Bond | Calc | 1.08000, Rep | 1.0757(6) ..... | Senseless s.u. |
| C4                     | -H6  | 1.555        | 1.555 .....     | # 13 Check     |

**Author Response: Positions of H atoms were estimated from multipole refinements with polarized basis.**

|                        |      |              |                 |                |
|------------------------|------|--------------|-----------------|----------------|
| PLAT751_ALERT_4_C Bond | Calc | 1.09000, Rep | 1.0869(6) ..... | Senseless s.u. |
| C7                     | -H7  | 1.555        | 1.555 .....     | # 21 Check     |

**Author Response: Positions of H atoms were estimated from multipole refinements with polarized basis.**

|                        |      |              |                 |                |
|------------------------|------|--------------|-----------------|----------------|
| PLAT751_ALERT_4_C Bond | Calc | 1.08000, Rep | 1.0785(6) ..... | Senseless s.u. |
| C7                     | -H8  | 1.555        | 1.555 .....     | # 22 Check     |

**Author Response: Positions of H atoms were estimated from multipole refinements with polarized basis.**

|                        |      |              |                 |                |
|------------------------|------|--------------|-----------------|----------------|
| PLAT751_ALERT_4_C Bond | Calc | 1.09000, Rep | 1.0886(6) ..... | Senseless s.u. |
| C7                     | -H9  | 1.555        | 1.555 .....     | # 23 Check     |

**Author Response: Positions of H atoms were estimated from multipole refinements with polarized basis.**

|                        |      |              |                 |                |
|------------------------|------|--------------|-----------------|----------------|
| PLAT751_ALERT_4_C Bond | Calc | 1.11000, Rep | 1.1059(7) ..... | Senseless s.u. |
| C8                     | -H10 | 1.555        | 1.555 .....     | # 24 Check     |

**Author Response: Positions of H atoms were estimated from multipole refinements with polarized basis.**

|                        |      |              |                 |                |
|------------------------|------|--------------|-----------------|----------------|
| PLAT751_ALERT_4_C Bond | Calc | 1.08000, Rep | 1.0780(6) ..... | Senseless s.u. |
| C8                     | -H11 | 1.555        | 1.555 .....     | # 25 Check     |

**Author Response: Positions of H atoms were estimated from multipole refinements with polarized basis.**

|                        |      |              |                 |                |
|------------------------|------|--------------|-----------------|----------------|
| PLAT751_ALERT_4_C Bond | Calc | 1.09000, Rep | 1.0908(6) ..... | Senseless s.u. |
| C8                     | -H12 | 1.555        | 1.555 .....     | # 26 Check     |

**Author Response: Positions of H atoms were estimated from multipole refinements with polarized basis.**

|                        |      |              |                 |                |
|------------------------|------|--------------|-----------------|----------------|
| PLAT751_ALERT_4_C Bond | Calc | 0.96000, Rep | 0.9622(5) ..... | Senseless s.u. |
| O3                     | -H13 | 1.555        | 1.555 .....     | # 27 Check     |

**Author Response: Positions of H atoms were estimated from multipole refinements with polarized basis.**

|                        |      |              |                 |                |
|------------------------|------|--------------|-----------------|----------------|
| PLAT751_ALERT_4_C Bond | Calc | 0.96000, Rep | 0.9625(5) ..... | Senseless s.u. |
| O3                     | -H14 | 1.555        | 1.555 .....     | # 28 Check     |

**Author Response: Positions of H atoms were estimated from multipole refinements with polarized basis.**

|                        |      |              |                 |                |
|------------------------|------|--------------|-----------------|----------------|
| PLAT751_ALERT_4_C Bond | Calc | 0.96000, Rep | 0.9628(5) ..... | Senseless s.u. |
| O4                     | -H15 | 1.555        | 1.555 .....     | # 29 Check     |

**Author Response: Positions of H atoms were estimated from multipole refinements with polarized basis.**

|                        |      |              |                 |                |
|------------------------|------|--------------|-----------------|----------------|
| PLAT751_ALERT_4_C Bond | Calc | 0.96000, Rep | 0.9621(5) ..... | Senseless s.u. |
| O4                     | -H16 | 1.555        | 1.555 .....     | # 30 Check     |

**Author Response: Positions of H atoms were estimated from multipole refinements with polarized basis.**

|                   |       |      |         |       |           |       |                |
|-------------------|-------|------|---------|-------|-----------|-------|----------------|
| PLAT752_ALERT_4_C | Angle | Calc | 109.00, | Rep   | 108.59(5) | ..... | Senseless s.u. |
| N1                | -C3   | -H1  | 1.555   | 1.555 | 1.555     | #     | 10 Check       |

**Author Response: Positions of H atoms were estimated from multipole refinements with polarized basis.**

|                   |       |      |         |       |           |       |                |
|-------------------|-------|------|---------|-------|-----------|-------|----------------|
| PLAT752_ALERT_4_C | Angle | Calc | 109.00, | Rep   | 108.79(5) | ..... | Senseless s.u. |
| N1                | -C3   | -H2  | 1.555   | 1.555 | 1.555     | #     | 11 Check       |

**Author Response: Positions of H atoms were estimated from multipole refinements with polarized basis.**

|                   |       |      |         |       |           |       |                |
|-------------------|-------|------|---------|-------|-----------|-------|----------------|
| PLAT752_ALERT_4_C | Angle | Calc | 111.00, | Rep   | 110.60(5) | ..... | Senseless s.u. |
| H1                | -C3   | -H2  | 1.555   | 1.555 | 1.555     | #     | 12 Check       |

**Author Response: Positions of H atoms were estimated from multipole refinements with polarized basis.**

|                   |       |      |         |       |           |       |                |
|-------------------|-------|------|---------|-------|-----------|-------|----------------|
| PLAT752_ALERT_4_C | Angle | Calc | 108.00, | Rep   | 108.14(5) | ..... | Senseless s.u. |
| N1                | -C3   | -H3  | 1.555   | 1.555 | 1.555     | #     | 13 Check       |

**Author Response: Positions of H atoms were estimated from multipole refinements with polarized basis.**

|                   |       |      |         |       |           |       |                |
|-------------------|-------|------|---------|-------|-----------|-------|----------------|
| PLAT752_ALERT_4_C | Angle | Calc | 110.00, | Rep   | 110.44(6) | ..... | Senseless s.u. |
| H1                | -C3   | -H3  | 1.555   | 1.555 | 1.555     | #     | 14 Check       |

**Author Response: Positions of H atoms were estimated from multipole refinements with polarized basis.**

|                   |       |      |         |       |           |       |                |
|-------------------|-------|------|---------|-------|-----------|-------|----------------|
| PLAT752_ALERT_4_C | Angle | Calc | 110.00, | Rep   | 110.22(5) | ..... | Senseless s.u. |
| H2                | -C3   | -H3  | 1.555   | 1.555 | 1.555     | #     | 15 Check       |

**Author Response: Positions of H atoms were estimated from multipole refinements with polarized basis.**

|                   |       |      |         |       |           |       |                |
|-------------------|-------|------|---------|-------|-----------|-------|----------------|
| PLAT752_ALERT_4_C | Angle | Calc | 108.00, | Rep   | 107.99(5) | ..... | Senseless s.u. |
| N1                | -C4   | -H4  | 1.555   | 1.555 | 1.555     | #     | 16 Check       |

**Author Response: Positions of H atoms were estimated from multipole refinements with polarized basis.**

|                   |       |      |         |       |           |       |                |
|-------------------|-------|------|---------|-------|-----------|-------|----------------|
| PLAT752_ALERT_4_C | Angle | Calc | 110.00, | Rep   | 109.52(5) | ..... | Senseless s.u. |
| N1                | -C4   | -H5  | 1.555   | 1.555 | 1.555     | #     | 17 Check       |

**Author Response: Positions of H atoms were estimated from multipole refinements with polarized basis.**

|                   |       |      |         |       |           |       |                |
|-------------------|-------|------|---------|-------|-----------|-------|----------------|
| PLAT752_ALERT_4_C | Angle | Calc | 109.00, | Rep   | 109.12(6) | ..... | Senseless s.u. |
|                   | H4    | -C4  | -H5     | 1.555 | 1.555     | 1.555 | # 18 Check     |

**Author Response: Positions of H atoms were estimated from multipole refinements with polarized basis.**

|                   |       |      |         |       |           |       |                |
|-------------------|-------|------|---------|-------|-----------|-------|----------------|
| PLAT752_ALERT_4_C | Angle | Calc | 109.00, | Rep   | 108.77(5) | ..... | Senseless s.u. |
|                   | N1    | -C4  | -H6     | 1.555 | 1.555     | 1.555 | # 19 Check     |

**Author Response: Positions of H atoms were estimated from multipole refinements with polarized basis.**

|                   |       |      |         |       |           |       |                |
|-------------------|-------|------|---------|-------|-----------|-------|----------------|
| PLAT752_ALERT_4_C | Angle | Calc | 111.00, | Rep   | 110.59(5) | ..... | Senseless s.u. |
|                   | H4    | -C4  | -H6     | 1.555 | 1.555     | 1.555 | # 20 Check     |

**Author Response: Positions of H atoms were estimated from multipole refinements with polarized basis.**

|                   |       |      |         |       |           |       |                |
|-------------------|-------|------|---------|-------|-----------|-------|----------------|
| PLAT752_ALERT_4_C | Angle | Calc | 111.00, | Rep   | 110.81(5) | ..... | Senseless s.u. |
|                   | H5    | -C4  | -H6     | 1.555 | 1.555     | 1.555 | # 21 Check     |

**Author Response: Positions of H atoms were estimated from multipole refinements with polarized basis.**

|                   |       |      |         |       |           |       |                |
|-------------------|-------|------|---------|-------|-----------|-------|----------------|
| PLAT752_ALERT_4_C | Angle | Calc | 109.00, | Rep   | 109.00(5) | ..... | Senseless s.u. |
|                   | N2    | -C7  | -H7     | 1.555 | 1.555     | 1.555 | # 31 Check     |

**Author Response: Positions of H atoms were estimated from multipole refinements with polarized basis.**

|                   |       |      |         |       |           |       |                |
|-------------------|-------|------|---------|-------|-----------|-------|----------------|
| PLAT752_ALERT_4_C | Angle | Calc | 109.00, | Rep   | 109.48(5) | ..... | Senseless s.u. |
|                   | N2    | -C7  | -H8     | 1.555 | 1.555     | 1.555 | # 32 Check     |

**Author Response: Positions of H atoms were estimated from multipole refinements with polarized basis.**

|                   |       |      |         |       |           |       |                |
|-------------------|-------|------|---------|-------|-----------|-------|----------------|
| PLAT752_ALERT_4_C | Angle | Calc | 110.00, | Rep   | 110.33(5) | ..... | Senseless s.u. |
|                   | H7    | -C7  | -H8     | 1.555 | 1.555     | 1.555 | # 33 Check     |

**Author Response: Positions of H atoms were estimated from multipole refinements with polarized basis.**

|                   |       |      |         |       |           |       |                |
|-------------------|-------|------|---------|-------|-----------|-------|----------------|
| PLAT752_ALERT_4_C | Angle | Calc | 109.00, | Rep   | 109.35(5) | ..... | Senseless s.u. |
|                   | N2    | -C7  | -H9     | 1.555 | 1.555     | 1.555 | # 34 Check     |

**Author Response: Positions of H atoms were estimated from multipole refinements with polarized basis.**

|                   |       |      |         |       |           |       |                |
|-------------------|-------|------|---------|-------|-----------|-------|----------------|
| PLAT752_ALERT_4_C | Angle | Calc | 108.00, | Rep   | 107.65(5) | ..... | Senseless s.u. |
|                   | H7    | -C7  | -H9     | 1.555 | 1.555     | 1.555 | # 35 Check     |

**Author Response: Positions of H atoms were estimated from multipole refinements with polarized basis.**

|                   |       |      |         |       |           |       |                |
|-------------------|-------|------|---------|-------|-----------|-------|----------------|
| PLAT752_ALERT_4_C | Angle | Calc | 111.00, | Rep   | 110.98(5) | ..... | Senseless s.u. |
|                   | H8    | -C7  | -H9     | 1.555 | 1.555     | 1.555 | # 36 Check     |

**Author Response: Positions of H atoms were estimated from multipole refinements with polarized basis.**

|                   |       |      |         |       |           |       |                |
|-------------------|-------|------|---------|-------|-----------|-------|----------------|
| PLAT752_ALERT_4_C | Angle | Calc | 109.00, | Rep   | 108.99(5) | ..... | Senseless s.u. |
|                   | N2    | -C8  | -H10    | 1.555 | 1.555     | 1.555 | # 37 Check     |

**Author Response: Positions of H atoms were estimated from multipole refinements with polarized basis.**

|                   |       |      |         |       |           |       |                |
|-------------------|-------|------|---------|-------|-----------|-------|----------------|
| PLAT752_ALERT_4_C | Angle | Calc | 109.00, | Rep   | 108.53(5) | ..... | Senseless s.u. |
|                   | N2    | -C8  | -H11    | 1.555 | 1.555     | 1.555 | # 38 Check     |

**Author Response: Positions of H atoms were estimated from multipole refinements with polarized basis.**

|                   |       |      |         |       |           |       |                |
|-------------------|-------|------|---------|-------|-----------|-------|----------------|
| PLAT752_ALERT_4_C | Angle | Calc | 111.00, | Rep   | 111.01(5) | ..... | Senseless s.u. |
|                   | H10   | -C8  | -H11    | 1.555 | 1.555     | 1.555 | # 39 Check     |

**Author Response: Positions of H atoms were estimated from multipole refinements with polarized basis.**

|                   |       |      |         |       |           |       |                |
|-------------------|-------|------|---------|-------|-----------|-------|----------------|
| PLAT752_ALERT_4_C | Angle | Calc | 109.00, | Rep   | 109.17(5) | ..... | Senseless s.u. |
|                   | N2    | -C8  | -H12    | 1.555 | 1.555     | 1.555 | # 40 Check     |

**Author Response: Positions of H atoms were estimated from multipole refinements with polarized basis.**

|                   |       |      |         |       |           |       |                |
|-------------------|-------|------|---------|-------|-----------|-------|----------------|
| PLAT752_ALERT_4_C | Angle | Calc | 110.00, | Rep   | 110.08(5) | ..... | Senseless s.u. |
|                   | H10   | -C8  | -H12    | 1.555 | 1.555     | 1.555 | # 41 Check     |

**Author Response: Positions of H atoms were estimated from multipole refinements with polarized basis.**

|                   |       |      |         |       |           |       |                |
|-------------------|-------|------|---------|-------|-----------|-------|----------------|
| PLAT752_ALERT_4_C | Angle | Calc | 109.00, | Rep   | 109.03(5) | ..... | Senseless s.u. |
|                   | H11   | -C8  | -H12    | 1.555 | 1.555     | 1.555 | # 42 Check     |

**Author Response: Positions of H atoms were estimated from multipole refinements with polarized basis.**

PLAT752\_ALERT\_4\_C Angle Calc 104.00, Rep 103.66(5) ..... Senseless s.u.  
H13 -O3 -H14 1.555 1.555 1.555 # 43 Check

**Author Response: Positions of H atoms were estimated from multipole refinements with polarized basis.**

PLAT752\_ALERT\_4\_C Angle Calc 108.00, Rep 108.13(5) ..... Senseless s.u.  
H15 -O4 -H16 1.555 1.555 1.555 # 44 Check

**Author Response: Positions of H atoms were estimated from multipole refinements with polarized basis.**

---

### ● Alert level G

PLAT007\_ALERT\_5\_G Number of Unrefined Donor-H Atoms ..... 4 Report  
PLAT066\_ALERT\_1\_G Predicted and Reported Tmin&Tmax Range Identical ? Check  
PLAT432\_ALERT\_2\_G Short Inter X...Y Contact C1 ..C5 3.20 Ang.  
x,y,z = 1.555 Check  
PLAT760\_ALERT\_1\_G CIF Contains no Torsion Angles ..... ? Info  
PLAT764\_ALERT\_4\_G Overcomplete CIF Bond List Detected (Rep/Expd) . 1.17 Ratio  
PLAT790\_ALERT\_4\_G Centre of Gravity not Within Unit Cell: Resd. # 3 Note  
H2 O  
PLAT790\_ALERT\_4\_G Centre of Gravity not Within Unit Cell: Resd. # 4 Note  
H2 O  
PLAT912\_ALERT\_4\_G Missing # of FCF Reflections Above STh/L= 0.600 7169 Note  
PLAT941\_ALERT\_3\_G Average HKL Measurement Multiplicity ..... 1.0 Low  
PLAT952\_ALERT\_5\_G Calculated (ThMax) and CIF-Reported Lmax Differ 2 Units  
PLAT958\_ALERT\_1\_G Calculated (ThMax) and Actual (FCF) Lmax Differ 2 Units  
PLAT978\_ALERT\_2\_G Number C-C Bonds with Positive Residual Density. 4 Info

---

0 **ALERT level A** = Most likely a serious problem - resolve or explain  
0 **ALERT level B** = A potentially serious problem, consider carefully  
61 **ALERT level C** = Check. Ensure it is not caused by an omission or oversight  
12 **ALERT level G** = General information/check it is not something unexpected

4 ALERT type 1 CIF construction/syntax error, inconsistent or missing data  
3 ALERT type 2 Indicator that the structure model may be wrong or deficient  
18 ALERT type 3 Indicator that the structure quality may be low  
46 ALERT type 4 Improvement, methodology, query or suggestion  
2 ALERT type 5 Informative message, check

---

## checkCIF publication errors

---

### ● Alert level G

PUBL017\_ALERT\_1\_G The \_publ\_section\_references section is missing or empty.

---

0 **ALERT level A** = Data missing that is essential or data in wrong format  
1 **ALERT level G** = General alerts. Data that may be required is missing

---

## Publication of your CIF

You should attempt to resolve as many as possible of the alerts in all categories. Often the minor alerts point to easily fixed oversights, errors and omissions in your CIF or refinement strategy, so attention to these fine details can be worthwhile. In order to resolve some of the more serious problems it may be necessary to carry out additional measurements or structure refinements. However, the nature of your study may justify the reported deviations from journal submission requirements and the more serious of these should be commented upon in the discussion or experimental section of a paper or in the "special\_details" fields of the CIF. *checkCIF* was carefully designed to identify outliers and unusual parameters, but every test has its limitations and alerts that are not important in a particular case may appear. Conversely, the absence of alerts does not guarantee there are no aspects of the results needing attention. It is up to the individual to critically assess their own results and, if necessary, seek expert advice.

If you wish to submit your CIF for publication in Acta Crystallographica Section C or E, you should upload your CIF via the web. If you wish to submit your CIF for publication in IUCrData you should upload your CIF via the web. If your CIF is to form part of a submission to another IUCr journal, you will be asked, either during electronic submission or by the Co-editor handling your paper, to upload your CIF via our web site.

---

**PLATON version of 16/07/2020; check.def file version of 12/07/2020**

Datablock SQ1820 - ellipsoid plot

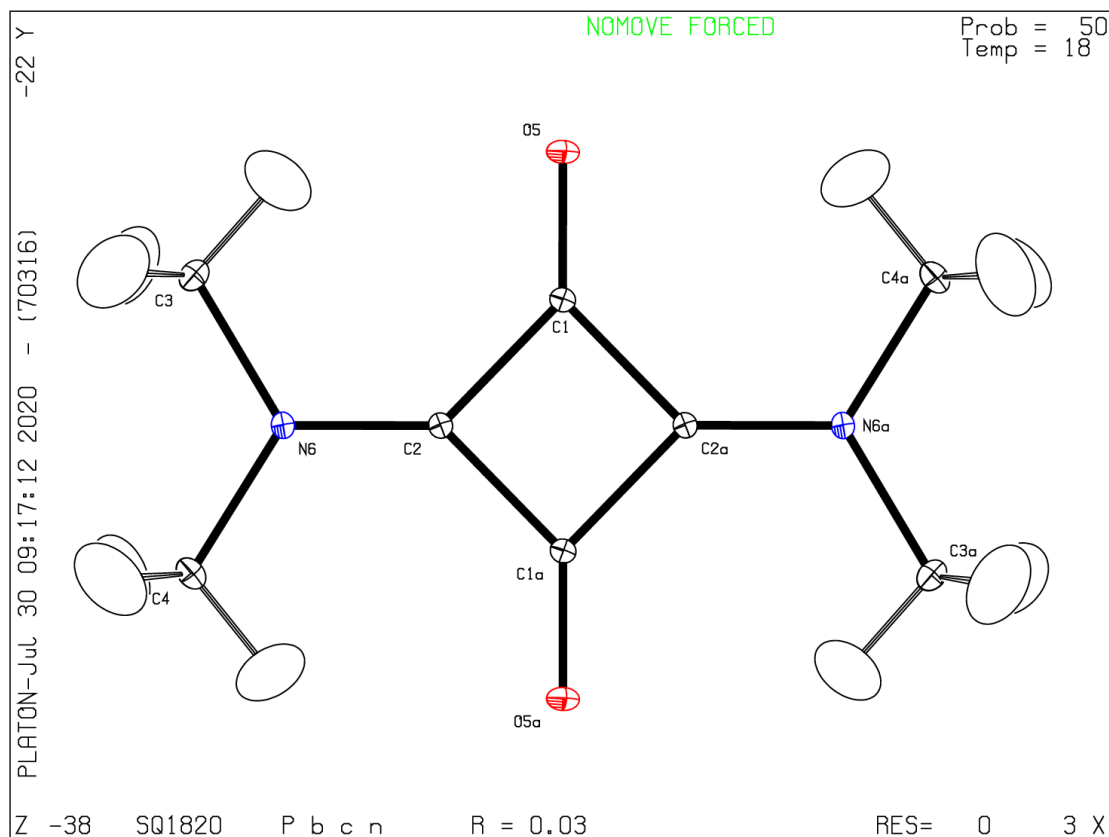

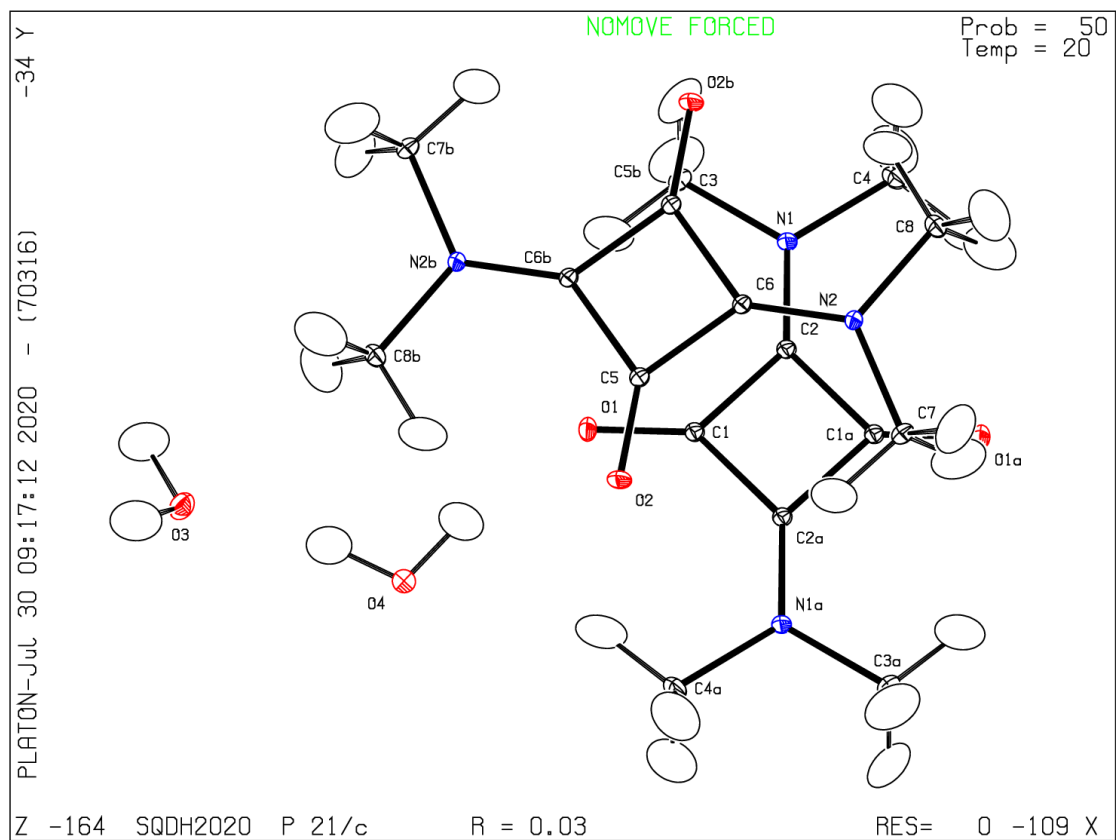

Supplement: s1 [file s1 › Destro_et_al_checkcif.pdf]
