# Supplementary material
Source: MDPI journal article supplement (https://www.mdpi.com/2073-4352/10/10/894)
Supplement: s1 [file s1]

Archive with 5 entries (5 files):
- Destro_et_al.cif
- Destro_et_al_checkcif.pdf
- Multipole_parameters_SQ.doc
- Multipole_parameters_SQDH.doc
- Readme.txt
