# Supplementary material
Source: MDPI journal article supplement (https://www.mdpi.com/2073-4352/10/10/894)
Supplement: s1 [file s1 › Destro_et_al.cif]

data_SQ1820

#------------------ SUBMISSION DETAILS --------------------------------------#
 
# Name and address of author for correspondence

_publ_contact_author_name      'Riccardo Destro'
_publ_contact_author_address 
;
Department of Chemistry
Universit\'a degli studi di Milano 
Via golgi 19, 20133 Milano (Italy)
;
_publ_contact_author_email       'riccardo.destro@unimi.it'
_publ_contact_author_fax         '+3950314300'
_publ_requested_journal          'Crystals'
_publ_contact_letter
;

To the Scientific Editor

Object: Submission of the Crystallographic Information File for publication

                                                    Milano,July 31^th^ 2020

Dear Sir / Madam,
        We wish to deposit the following crystal structures data. 
        at very low T (18-20 K). This deposition is preliminary
        to a submission to Crystals as a regular Article.

                 Yours sincerely

                 Riccardo Destro 

                 riccardo.destro@unimi.it
                 Dipartimento di Chimica 
                 Universit\'a degli Studi di Milano
                 Via Golgi 19, 20133 Milano (Italy)
;

_publ_section_title              
;
Experimental charge density analysis and electrostatic properties 
of crystalline 1,3-bis(dimethylamino)squaraine and its dihydrate from 
low temperature (T=18 and 20 K) XRD data
;

loop_
_publ_author_name 
_publ_author_address 
'Destro, Riccardo'
;
Department of Chemistry
Universit\'a degli studi di Milano 
Via golgi 19, 20133 Milano (Italy)
;
'Roversi, Pietro'
;
Leicester Institute of Structural and Chemical Biology 
Department of Molecular and Cell Biology 
University of Leicester 
Lancaster Road, Leicester, LE1 7HB (UK)
; 
'Soave, Raffaella'
;
Istituto di Scienze e Tecnologie Chimiche "Giulio Natta" (SCITEC) 
Italian Research Council
Via Golgi 19, 20133 Milano (Italy)
;
'Lo Presti, Leonardo'
;
Department of Chemistry
Universit\'a degli studi di Milano 
Via golgi 19, 20133 Milano (Italy)
;

_publ_section_abstract 
;
Multipolar refinements of structural models fitting X-ray diffraction 
(XRD) extensive sets of data from single crystals of 1,3-bis(dimethylamino)
squaraine [SQ, C~8~H~12~N~2~O~4~] and its dihydrate [SQDH, 
C~8~H~12~N~2~O~4~x2H~2~O], collected at very low T (18(1) K for SQ, 
20(1) K for SQDH), led to an accurate description of their crystal electron 
density distributions. Atomic volumes and charges have been estimated 
from the experimental charge densities using the Quantum Theory of Atoms 
in Molecules (QTAIM) formalism. Our analysis confirms the common 
representation (in the literature and textbooks) of the squaraine central, 
four-membered squarylium ring as carrying two positive charges, a 
representation that has been recently questioned by some theoretical 
calculations: the integrated total charge on the C~4~ fragment is 
estimated as ca. +2.4e in SQ and +2.2e in SQDH. The topology 
of the experimental electron density for the SQ squaraine molecule is 
modified in the dihydrated crystal by interactions between the methyl 
groups and the H2O molecules in the crystal. Maps of the molecular 
electrostatic potential in the main molecular planes in both crystals 
clearly reveal the quadrupolar charge distribution of the squaraine 
molecules. Molecular quadrupole tensors, as calculated with the PAMoC 
package using both Stewart-LSQ and QTAIM distributed multipole analysis 
(DMA), are the same within experimental error.
;

#------------------ Validation reply form -----------------------------------#
_vrf_CELLK01_SQ1820
;
PROBLEM: Check that the cell measurement temperature is in Kelvin.
Value of measurement temperature given = 18.000
RESPONSE: That's correct. The data collection was performed at 18(1) K.
;
_vrf_DIFMX02_SQ1820
;
PROBLEM: The maximum difference density is > 0.1*ZMAX*0.75
The relevant atom site should be identified.
RESPONSE: The maximum Fourier difference is located near the C1 atom.
It depends on the anisotropic features of its charge density distribution.
The latter are neatly detectable with the Independent Atom Model, 
as this dataset was collected at 18(1) K.
;
_vrf_PLAT097_SQ1820
;
PROBLEM: Large Reported Max. (Positive) Residual Density 0.61 eA-3
RESPONSE:The maximum Fourier difference is located near the C1 atom.
It depends on the anisotropic features of its charge density distribution.
The latter are neatly detectable with the Independent Atom Model, 
as this dataset was collected at 18(1) K.
;
_vrf_PLAT218_SQ1820
;
PROBLEM: Constrained U(ij) Components(s) for H4A . 6 Check
PROBLEM: Constrained U(ij) Components(s) for H4B . 6 Check 
PROBLEM: Constrained U(ij) Components(s) for H4C . 6 Check 
PROBLEM: Constrained U(ij) Components(s) for H3A . 6 Check 
PROBLEM: Constrained U(ij) Components(s) for H3B . 6 Check 
PROBLEM: Constrained U(ij) Components(s) for H3C . 6 Check 
RESPONSE: Anisotropic U(ij) components were estimated by ADPH (Roversi & 
Destro, 2004) and never refined.
; 
_vrf_PLAT351_SQ1820
;
PROBLEM:Long C-H (X0.96,N1.08A) C4 - H4C . 1.11 Ang.
RESPONSE:Positions of H atoms were estimated from multipole refinements 
with polarized basis.
;
_vrf_PLAT751_SQ1820
;
PROBLEM: Bond Calc 1.08000, Rep 1.0793(3) ...... Senseless s.u.
C3 -H3A 1.555 1.555 ........ # 7 Check
PROBLEM: Bond Calc 1.09000, Rep 1.0873(3) ...... Senseless s.u.
C3 -H3B 1.555 1.555 ........ # 8 Check
PROBLEM: Bond Calc 1.06000, Rep 1.0624(3) ...... Senseless s.u.
C3 -H3C 1.555 1.555 ........ # 9 Check
PROBLEM: Bond Calc 1.06000, Rep 1.0624(3) ...... Senseless s.u.
C4 -H4A 1.555 1.555 ........ # 11 Check
PROBLEM: Bond Calc 1.07000, Rep 1.0728(3) ...... Senseless s.u.
C4 -H4B 1.555 1.555 ........ # 12 Check
PROBLEM: Bond Calc 1.11000, Rep 1.1144(3) ...... Senseless s.u.
C4 -H4C 1.555 1.555 ........ # 13 Check
RESPONSE: Positions of H atoms were estimated from multipole refinements 
with polarized basis.
; 
_vrf_PLAT752_SQ1820
;
PROBLEM: Angle Calc 110.00, Rep 109.60(3) ...... Senseless s.u.
N6 -C3 -H3A 1.555 1.555 1.555 # 7 Check
PROBLEM: Angle Calc 109.00, Rep 109.39(3) ...... Senseless s.u.
N6 -C3 -H3B 1.555 1.555 1.555 # 8 Check
PROBLEM: Angle Calc 110.00, Rep 110.11(3) ...... Senseless s.u.
H3A -C3 -H3B 1.555 1.555 1.555 # 9 Check
PROBLEM: Angle Calc 108.00, Rep 107.77(2) ...... Senseless s.u.
N6 -C3 -H3C 1.555 1.555 1.555 # 10 Check
PROBLEM: Angle Calc 110.00, Rep 109.57(3) ...... Senseless s.u.
H3A -C3 -H3C 1.555 1.555 1.555 # 11 Check
PROBLEM: Angle Calc 110.00, Rep 110.36(3) ...... Senseless s.u.
H3B -C3 -H3C 1.555 1.555 1.555 # 12 Check
PROBLEM: Angle Calc 109.00, Rep 109.40(2) ...... Senseless s.u.
N6 -C4 -H4A 1.555 1.555 1.555 # 13 Check
PROBLEM: Angle Calc 110.00, Rep 110.08(3) ...... Senseless s.u.
N6 -C4 -H4B 1.555 1.555 1.555 # 14 Check
PROBLEM: Angle Calc 110.00, Rep 109.53(3) ...... Senseless s.u.
H4A -C4 -H4B 1.555 1.555 1.555 # 15 Check
PROBLEM: Angle Calc 109.00, Rep 109.00(2) ...... Senseless s.u.
N6 -C4 -H4C 1.555 1.555 1.555 # 16 Check
PROBLEM: Angle Calc 110.00, Rep 109.86(3) ...... Senseless s.u.
H4A -C4 -H4C 1.555 1.555 1.555 # 17 Check
PROBLEM: Angle Calc 109.00, Rep 108.97(2) ...... Senseless s.u.
H4B -C4 -H4C 1.555 1.555 1.555 # 18 Check
RESPONSE: Positions of H atoms were estimated from multipole refinements 
with polarized basis.
;
_vrf_PLAT905_SQ1820
;
PROBLEM: Negative K value in the Analysis of Variance ... -0.209 Report
RESPONSE: This is a high-resolution dataset collected at 18(1) K. The 
problem is due to weak high-order data and is solved by applying a 
multipole model for the charge density analysis.
;

_audit_creation_method            SHELXL-2014/4
_chemical_name_systematic         ?
_chemical_name_common             bis(dimethylamino)squaraine
_chemical_melting_point           ?
_chemical_formula_moiety        'C8 H12 N2 O2'
_chemical_formula_sum           'C8 H12 N2 O2' 
_chemical_formula_weight          168.20

loop_
 _atom_type_symbol
 _atom_type_description
 _atom_type_scat_dispersion_real
 _atom_type_scat_dispersion_imag
 _atom_type_scat_source
 'C'  'C'   0.0033   0.0016
 'International Tables Vol C Tables 4.2.6.8 and 6.1.1.4'
 'N'  'N'   0.0061   0.0033
 'International Tables Vol C Tables 4.2.6.8 and 6.1.1.4'
 'O'  'O'   0.0106   0.0060
 'International Tables Vol C Tables 4.2.6.8 and 6.1.1.4'
 'H'  'H'   0.0000   0.0000
 'International Tables Vol C Tables 4.2.6.8 and 6.1.1.4'
 
_space_group_crystal_system       orthorhombic
_space_group_IT_number            60
_space_group_name_H-M_alt         'P b c n'
_space_group_name_Hall            '-P 2n 2ab'
 
_shelx_space_group_comment
;
The symmetry employed for this shelxl refinement is uniquely defined
by the following loop, which should always be used as a source of
symmetry information in preference to the above space-group names.
They are only intended as comments.
;
 
loop_
 _space_group_symop_operation_xyz
 'x, y, z'
 '-x, y, -z+1/2'
 'x+1/2, -y+1/2, -z'
 '-x+1/2, -y+1/2, z+1/2'
 '-x, -y, -z'
 'x, -y, z-1/2'
 '-x-1/2, y-1/2, z'
 'x-1/2, y-1/2, -z-1/2'
 
_cell_length_a                    15.072(2)
_cell_length_b                    7.9873(9)
_cell_length_c                    6.8410(9)
_cell_angle_alpha                 90
_cell_angle_beta                  90
_cell_angle_gamma                 90
_cell_volume                      823.55(18)
_cell_formula_units_Z             4
_cell_measurement_temperature     18(1)
_cell_measurement_reflns_used     90
_cell_measurement_theta_min       13.445 
_cell_measurement_theta_max       15.27
 
_exptl_crystal_description        prism
_exptl_crystal_colour             colourless
_exptl_crystal_density_meas       ?
_exptl_crystal_density_method     ?
_exptl_crystal_density_diffrn     1.357          
_exptl_crystal_F_000              360
_exptl_transmission_factor_min    ?
_exptl_transmission_factor_max    ?
_exptl_crystal_size_max           0.38
_exptl_crystal_size_mid           0.354
_exptl_crystal_size_min           0.25
_exptl_absorpt_coefficient_mu     0.099
_shelx_estimated_absorpt_T_min    ?
_shelx_estimated_absorpt_T_max    ?
_exptl_absorpt_correction_type    none
_exptl_absorpt_correction_T_min   0.9696
_exptl_absorpt_correction_T_max   0.9789
_exptl_absorpt_process_details    ?
_diffrn_ambient_temperature       18(1)
_diffrn_radiation_wavelength      0.71073
_diffrn_radiation_type            MoK\a
_diffrn_source                    'fine-focus sealed tube' 
_diffrn_measurement_device_type   'Syntex P1' 
_diffrn_measurement_method        'profile data from \q/2\q scans'
_diffrn_detector_area_resol_mean  ?
_diffrn_standards_number          3
_diffrn_standards_interval_count  100 
_diffrn_standards_interval_time   ?
_diffrn_standards_decay_%         1.7(1)
_diffrn_reflns_number             5163
_diffrn_reflns_av_R_equivalents   0.0250
_diffrn_reflns_av_unetI/netI      0.0198
_diffrn_reflns_limit_h_min        0 
_diffrn_reflns_limit_h_max        34 
_diffrn_reflns_limit_k_min        0 
_diffrn_reflns_limit_k_max        18 
_diffrn_reflns_limit_l_min        0 
_diffrn_reflns_limit_l_max        15 
_diffrn_reflns_theta_min          2.703
_diffrn_reflns_theta_max         54.394
_diffrn_reflns_theta_full        25.242
_diffrn_measured_fraction_theta_max   1.000
_diffrn_measured_fraction_theta_full  1.000
_diffrn_reflns_Laue_measured_fraction_max    1.000
_diffrn_reflns_Laue_measured_fraction_full   1.000
_diffrn_reflns_point_group_measured_fraction_max   1.000
_diffrn_reflns_point_group_measured_fraction_full  1.000
_reflns_number_total              5163
_reflns_number_gt                 4340
_reflns_threshold_expression      'I > 2\s(I)'
_reflns_Friedel_coverage          0.000
_reflns_Friedel_fraction_max      .
_reflns_Friedel_fraction_full     .
 
_reflns_special_details
;
 Data were apparently pre-merged, so _diffrn_reflns_number
 etc. will have to be added later.
 
 Reflections were merged by SHELXL according to the crystal
 class for the calculation of statistics and refinement.
 
 _reflns_Friedel_fraction is defined as the number of unique
 Friedel pairs measured divided by the number that would be
 possible theoretically, ignoring centric projections and
 systematic absences.
;
 
_computing_data_collection        'In-home programs'
_computing_cell_refinement        'In-home programs'
_computing_data_reduction         'In-home programs'
_computing_molecular_graphics     'Diamond 3.0 (Crystal Impact GbR, 2004)'
_computing_publication_material   'VALRAY (Carnegie Mellon University, 2000)'
_refine_special_details           ?

_refine_ls_structure_factor_coef  Fsqd
_refine_ls_matrix_type            full
_refine_ls_weighting_scheme       calc
_refine_ls_weighting_details
'w=1/[\s^2^(Fo^2^)+(0.0488P)^2^+0.0980P] where P=(Fo^2^+2Fc^2^)/3'
_atom_sites_solution_primary      direct
_atom_sites_solution_secondary    difmap
_atom_sites_solution_hydrogens    difmap
_refine_ls_hydrogen_treatment     noref
_refine_ls_extinction_method      SHELXL
_refine_ls_extinction_coef        0.023(3)
_refine_ls_extinction_expression
 'Fc^*^=kFc[1+0.001xFc^2^\l^3^/sin(2\q)]^-1/4^'
_refine_ls_number_reflns          5163
_refine_ls_number_parameters      56
_refine_ls_number_restraints      0
_refine_ls_R_factor_all           0.0417
_refine_ls_R_factor_gt            0.0314
_refine_ls_wR_factor_ref          0.0989
_refine_ls_wR_factor_gt           0.0896
_refine_ls_goodness_of_fit_ref    1.113
_refine_ls_restrained_S_all       1.113
_refine_ls_shift/su_max           0.001
_refine_ls_shift/su_mean          0.000
 
loop_
 _atom_site_label
 _atom_site_type_symbol
 _atom_site_fract_x
 _atom_site_fract_y
 _atom_site_fract_z
 _atom_site_U_iso_or_equiv
 _atom_site_adp_type
 _atom_site_occupancy
 _atom_site_site_symmetry_order  
 _atom_site_calc_flag
 _atom_site_refinement_flags_posn
 _atom_site_refinement_flags_adp
 _atom_site_refinement_flags_occupancy
 _atom_site_disorder_assembly
 _atom_site_disorder_group
C1 C 0.54013(2) 0.10316(3) 0.03600(4) 0.00500(3) Uani 1 1 d . . . . .
C2 C 0.44967(2) 0.07946(3) -0.03820(4) 0.00495(3) Uani 1 1 d . . . . .
C3 C 0.39629(2) 0.36290(3) -0.07128(5) 0.00878(4) Uani 1 1 d . . . . .
C4 C 0.30259(2) 0.12111(4) -0.17354(4) 0.00781(4) Uani 1 1 d . . . . .
N6 N 0.38514(2) 0.18221(3) -0.08824(4) 0.00584(3) Uani 1 1 d . . . . .
O5 O 0.58782(2) 0.22441(3) 0.07709(3) 0.00731(3) Uani 1 1 d . . . . .
H4A H 0.3032 -0.0119 -0.1752 0.029 Uani 1 1 d . . . . .
H4B H 0.2470 0.1644 -0.0895 0.032 Uani 1 1 d . . . . .
H4C H 0.2966 0.1698 -0.3256 0.033 Uani 1 1 d . . . . .
H3A H 0.3435 0.4142 0.0168 0.033 Uani 1 1 d . . . . .
H3B H 0.3954 0.4187 -0.2162 0.035 Uani 1 1 d . . . . .
H3C H 0.4582 0.3855 -0.0020 0.030 Uani 1 1 d . . . . .
 
loop_
 _atom_site_aniso_label
 _atom_site_aniso_U_11
 _atom_site_aniso_U_22
 _atom_site_aniso_U_33
 _atom_site_aniso_U_23
 _atom_site_aniso_U_13
 _atom_site_aniso_U_12
C1 0.00456(7) 0.00477(7) 0.00567(7) -0.00009(5) -0.00037(5) -0.00031(5)
C2 0.00446(7) 0.00480(7) 0.00559(7) 0.00013(5) -0.00047(5) 0.00014(5)
C3 0.00834(9) 0.00528(7) 0.01271(10) 0.00031(7) -0.00092(7) 0.00045(6)
C4 0.00524(7) 0.00889(8) 0.00931(9) -0.00020(7) -0.00139(6) -0.00010(6)
N6 0.00471(6) 0.00493(6) 0.00788(7) 0.00016(5) -0.00131(5) 0.00052(5)
O5 0.00646(6) 0.00577(6) 0.00968(7) -0.00092(5) -0.00095(5) -0.00186(5)
H4A 0.040 0.017 0.030 -0.002 0.004 -0.002
H4B 0.019 0.053 0.024 0.005 0.005 -0.006
H4C 0.028 0.053 0.019 0.000 -0.004 0.010
H3A 0.039 0.027 0.034 0.009 0.016 -0.001
H3B 0.052 0.027 0.024 0.007 0.002 0.009
H3C 0.020 0.040 0.031 -0.007 -0.004 -0.003
 
_geom_special_details
;
 All esds (except the esd in the dihedral angle between two l.s. planes)
 are estimated using the full covariance matrix.  The cell esds are taken
 into account individually in the estimation of esds in distances, angles
 and torsion angles; correlations between esds in cell parameters are only
 used when they are defined by crystal symmetry.  An approximate (isotropic)
 treatment of cell esds is used for estimating esds involving l.s. planes.
;
 
loop_
 _geom_bond_atom_site_label_1
 _geom_bond_atom_site_label_2
 _geom_bond_distance
 _geom_bond_site_symmetry_2
 _geom_bond_publ_flag
C1 O5 1.2384(3) . ?
C1 C2 1.4668(4) 5_655 ?
C1 C2 1.4671(4) . ?
C2 N6 1.3179(3) . ?
C2 C1 1.4668(4) 5_655 ?
C3 N6 1.4576(4) . ?
C3 H3A 1.0793(3) . ?
C3 H3B 1.0873(3) . ?
C3 H3C 1.0624(3) . ?
C4 N6 1.4584(4) . ?
C4 H4A 1.0624(3) . ?
C4 H4B 1.0728(3) . ?
C4 H4C 1.1144(3) . ?
 
loop_
 _geom_angle_atom_site_label_1
 _geom_angle_atom_site_label_2
 _geom_angle_atom_site_label_3
 _geom_angle
 _geom_angle_site_symmetry_1
 _geom_angle_site_symmetry_3
 _geom_angle_publ_flag
O5 C1 C2 135.61(2) . 5_655 ?
O5 C1 C2 135.95(2) . . ?
C2 C1 C2 88.433(19) 5_655 . ?
N6 C2 C1 134.37(2) . 5_655 ?
N6 C2 C1 134.06(2) . . ?
C1 C2 C1 91.57(2) 5_655 . ?
N6 C3 H3A 109.60(3) . . ?
N6 C3 H3B 109.39(3) . . ?
H3A C3 H3B 110.11(3) . . ?
N6 C3 H3C 107.77(2) . . ?
H3A C3 H3C 109.57(3) . . ?
H3B C3 H3C 110.36(3) . . ?
N6 C4 H4A 109.40(2) . . ?
N6 C4 H4B 110.08(3) . . ?
H4A C4 H4B 109.53(3) . . ?
N6 C4 H4C 109.00(2) . . ?
H4A C4 H4C 109.86(3) . . ?
H4B C4 H4C 108.97(2) . . ?
C2 N6 C3 120.72(2) . . ?
C2 N6 C4 121.68(2) . . ?
C3 N6 C4 117.49(2) . . ?
 
_refine_diff_density_max    0.613
_refine_diff_density_min   -0.324
_refine_diff_density_rms    0.075

_shelxl_version_number 2014/4

_shelx_res_file
;
TITL bis(dma)squaraine at T=18K july 2020
CELL 0.71073  15.0720  7.9873  6.8410 90.00  90.00  90.00
ZERR    4.00   0.0020  0.0009  0.0009  0.00   0.00   0.00
LATT 1
SYMM -X, Y, .5-Z
SYMM .5+X, .5-Y, -Z
SYMM .5-X, .5-Y, .5+Z
SFAC C N O H
UNIT 32 8 8 48
MERG 2
L.S. 20
BOND 0.5
BOND $H
ACTA
FMAP 2
PLAN 20
WGHT    0.048800    0.098000
EXTI    0.022966
FVAR       1.00194
MOLE   1
C1    1    0.540132    0.103157    0.036005    11.00000    0.00456    0.00477 =
         0.00567   -0.00009   -0.00037   -0.00031
C2    1    0.449671    0.079464   -0.038199    11.00000    0.00446    0.00480 =
         0.00559    0.00013   -0.00047    0.00014
C3    1    0.396293    0.362897   -0.071278    11.00000    0.00834    0.00528 =
         0.01271    0.00031   -0.00092    0.00045
C4    1    0.302586    0.121112   -0.173536    11.00000    0.00524    0.00889 =
         0.00931   -0.00020   -0.00139   -0.00010
N6    2    0.385140    0.182215   -0.088245    11.00000    0.00471    0.00493 =
         0.00788    0.00016   -0.00131    0.00052
O5    3    0.587820    0.224409    0.077087    11.00000    0.00646    0.00577 =
         0.00968   -0.00092   -0.00095   -0.00186
H4A   4   10.303150    9.988110    9.824800    11.00000   10.03975   10.01735 =
        10.03032    9.99773   10.00434    9.99846
H4B   4   10.247049   10.164400    9.910529    11.00000   10.01947   10.05253 =
        10.02397   10.00518   10.00502    9.99409
H4C   4   10.296619   10.169810    9.674380    11.00000   10.02771   10.05328 =
        10.01917    9.99985    9.99620   10.01009
H3A   4   10.343460   10.414220   10.016769    11.00000   10.03887   10.02701 =
        10.03406   10.00910   10.01577    9.99942
H3B   4   10.395381   10.418720    9.783780    11.00000   10.05201   10.02730 =
        10.02431   10.00680   10.00218   10.00860
H3C   4   10.458241   10.385509    9.997960    11.00000   10.02042   10.03954 =
        10.03104    9.99266    9.99596    9.99707
HKLF 4

REM  bis(dma)squaraine at T=18K july 2020
REM R1 =  0.0314 for    4340 Fo > 4sig(Fo)  and  0.0417 for all    5163 data
REM     56 parameters refined using      0 restraints

END

WGHT      0.0488      0.0986

REM Highest difference peak  0.613,  deepest hole -0.324,  1-sigma level  0.075
Q1    1   0.5581  0.1599  0.0553  11.00000  0.05    0.61
Q2    1   0.4199  0.1319 -0.0747  11.00000  0.05    0.56
Q3    1   0.2969  0.1542 -0.2797  11.00000  0.05    0.50
Q4    1   0.4481  0.0043 -0.0378  11.00000  0.05    0.49
Q5    1   0.5029  0.1051  0.0104  11.00000  0.05    0.48
Q6    1   0.3448  0.1512 -0.1163  11.00000  0.05    0.46
Q7    1   0.3042  0.0324 -0.1838  11.00000  0.05    0.45
Q8    1   0.4312  0.3763 -0.0553  11.00000  0.05    0.45
Q9    1   0.3938  0.4031 -0.1563  11.00000  0.05    0.43
Q10   1   0.3570  0.3956 -0.0330  11.00000  0.05    0.43
Q11   1   0.2690  0.1403 -0.1408  11.00000  0.05    0.42
Q12   1   0.3886  0.2571 -0.0847  11.00000  0.05    0.34
Q13   1   0.5624  0.2659  0.0820  11.00000  0.05    0.32
Q14   1   0.6201  0.2130  0.0907  11.00000  0.05    0.27
Q15   1   0.5708  0.2717  0.0132  11.00000  0.05    0.16
Q16   1   0.4038  0.3521  0.1405  11.00000  0.05    0.16
Q17   1   0.5494  0.3315  0.2005  11.00000  0.05    0.15
Q18   1   0.3497  0.3445  0.2243  11.00000  0.05    0.15
Q19   1   0.3116  0.0257 -0.2732  11.00000  0.05    0.15
Q20   1   0.4414  0.5726 -0.2774  11.00000  0.05    0.15
;
_shelx_res_checksum   69138

_shelx_hkl_file
;
   0   2   0 2294.47   24.22
   0   4   0 3068.28   33.39
   0   6   0  308.69    4.69
   0   8   0  149.40    1.96
   0  10   0  186.37    2.48
   0  12   0    6.93    0.58
   0  14   0   -0.33    0.51
   0  16   0    1.87    0.60
   0  18   0   -0.89    0.52
   0   2   1  751.67    7.34
   0   4   1   25.09    0.70
   0   6   1   66.04    1.49
   0   8   1   42.13    0.84
   0  10   1   88.41    1.49
   0  12   1  126.07    1.98
   0  14   1   50.30    1.24
   0  16   1    1.45    0.59
   0  18   1   36.33    1.07
   0   0   210066.60  143.91
   0   2   2  341.95    4.34
   0   4   2  232.46    3.41
   0   6   2  388.63    5.61
   0   8   2   13.35    0.51
   0  10   2   71.65    1.31
   0  12   2   72.74    1.42
   0  14   2    7.85    0.66
   0  16   2   32.02    1.06
   0  18   2    3.37    0.52
   0   2   3  132.89    2.17
   0   4   3   23.29    0.84
   0   6   3  152.36    2.79
   0   8   3  148.08    1.98
   0  10   3 1354.54   14.25
   0  12   3  269.46    3.50
   0  14   3    9.37    0.69
   0  16   3    4.74    0.65
   0   0   4  100.55    1.90
   0   2   4  915.66   11.00
   0   4   4  128.92    2.40
   0   6   4  379.02    5.72
   0   8   4   -0.37    0.37
   0  10   4   29.78    0.85
   0  12   4   55.49    1.26
   0  14   4   -0.75    0.52
   0  16   4   29.71    1.03
   0   2   5  547.48    7.43
   0   4   5   87.83    1.95
   0   6   5  368.70    4.20
   0   8   5   44.53    0.98
   0  10   5  901.14    9.79
   0  12   5    4.78    0.59
   0  14   5    8.14    0.70
   0  16   5   63.98    1.44
   0   0   6  647.87    8.92
   0   2   6 1005.42   12.88
   0   4   6  246.16    2.96
   0   6   6  130.10    1.86
   0   8   6   77.58    1.39
   0  10   6   20.42    0.81
   0  12   6   -0.17    0.53
   0  14   6   20.13    0.89
   0  16   6    0.76    0.56
   0   2   7   10.07    0.63
   0   4   7  121.45    1.78
   0   6   7    1.25    0.51
   0   8   7   20.23    0.78
   0  10   7   16.85    0.80
   0  12   7  189.97    2.81
   0  14   7   -0.56    0.57
   0  16   7   85.87    1.65
   0   0   8 1183.01   11.16
   0   2   8   76.01    1.47
   0   4   8  114.91    1.78
   0   6   8   22.39    0.83
   0   8   8   86.92    1.61
   0  10   8   -0.31    0.54
   0  12   8   26.76    1.00
   0  14   8   12.65    0.81
   0   2   9    8.36    0.75
   0   4   9   17.15    0.88
   0   6   9   43.36    1.14
   0   8   9   22.62    0.90
   0  10   9   48.96    1.27
   0  12   9  453.24    5.50
   0  14   9   42.70    1.19
   0   0  10   47.37    1.13
   0   2  10  103.94    1.86
   0   4  10   86.07    1.63
   0   6  10  185.50    2.71
   0   8  10   29.77    1.04
   0  10  10    3.52    0.68
   0  12  10    4.75    0.68
   0  14  10    9.17    0.74
   0   2  11    1.31    0.77
   0   4  11    9.58    0.82
   0   6  11   34.46    1.10
   0   8  11   -0.36    0.64
   0  10  11    5.72    0.73
   0  12  11  136.19    2.23
   0   0  12   47.93    1.28
   0   2  12  242.00    3.48
   0   4  12   19.11    1.29
   0   6  12  164.17    2.59
   0   8  12    7.21    0.78
   0  10  12   13.75    0.89
   0   2  13   83.84    1.87
   0   4  13   23.98    1.24
   0   6  13    3.81    0.89
   0   8  13    3.79    0.74
   0  10  13   -1.55    0.79
   0   0  14   57.00    1.54
   0   2  14   92.91    2.05
   0   4  14  112.09    2.03
   0   6  14   56.99    1.67
   0   8  14    5.58    1.82
   0   2  15    5.61    1.11
   0   4  15    9.82    1.10
   1   1   0 3798.20   38.47
   1   3   0 1318.10   14.99
   1   5   0   94.70    1.81
   1   7   0 1294.56   15.78
   1   9   0  206.70    2.62
   1  11   0  300.07    3.74
   1  13   0    4.42    0.60
   1  15   0  171.69    2.67
   1  17   0   38.32    1.17
   1   1   1  260.73    3.17
   1   2   1   13.80    0.47
   1   3   1  727.87    8.40
   1   4   1    6.21    0.41
   1   5   1  367.47    5.04
   1   6   1    1.42    0.33
   1   7   1   42.27    1.27
   1   8   1   34.18    0.77
   1   9   1    0.37    0.36
   1  10   1  233.40    3.00
   1  11   1    2.77    0.49
   1  12   1  119.87    1.96
   1  13   1   -0.07    0.52
   1  14   1   16.99    0.82
   1  15   1   15.80    0.84
   1  16   1   -0.67    0.57
   1  17   1   64.89    1.49
   1  18   1   23.55    0.93
   1   0   2 9233.75  132.10
   1   1   2 1410.43   12.91
   1   2   2  763.23    8.75
   1   3   2   92.74    1.61
   1   4   2  305.31    4.22
   1   5   2   20.25    0.82
   1   6   2   10.00    0.64
   1   7   2  786.02   10.45
   1   8   2   49.94    0.96
   1   9   2   63.43    1.15
   1  10   2    7.50    0.60
   1  11   2  216.32    2.90
   1  12   2   34.41    0.99
   1  13   2   24.55    0.91
   1  14   2    0.41    0.55
   1  15   2   94.15    1.84
   1  16   2   18.33    0.90
   1  17   2    0.55    0.59
   1  18   2   -0.99    0.53
   1   1   3    0.11    0.22
   1   2   3  671.69    8.09
   1   3   3  687.83    8.44
   1   4   3    5.17    0.55
   1   5   3  624.13    8.20
   1   6   3  219.14    3.67
   1   7   3  354.98    4.04
   1   8   3    2.87    0.38
   1   9   3   15.76    0.61
   1  10   3  134.47    2.01
   1  11   3  109.30    1.81
   1  12   3    8.50    0.64
   1  13   3   -1.06    0.50
   1  14   3   33.28    1.07
   1  15   3    9.70    0.76
   1  16   3   12.61    0.81
   1  17   3  277.85    3.73
   1   0   4 1107.11   12.83
   1   1   4  115.18    2.07
   1   2   4  615.59    7.81
   1   3   4   94.75    1.90
   1   4   4   39.85    1.23
   1   5   4  567.47    7.81
   1   6   4    4.10    0.56
   1   7   4    0.70    0.39
   1   8   4   72.20    1.26
   1   9   4    9.14    0.61
   1  10   4    0.51    0.46
   1  11   4   20.77    0.80
   1  12   4   27.38    0.94
   1  13   4    7.15    0.66
   1  14   4   10.97    0.76
   1  15   4   -0.41    0.57
   1  16   4    9.10    0.75
   1  17   4   26.42    0.98
   1   1   5   35.18    1.12
   1   2   5   18.80    0.90
   1   3   5  144.71    2.71
   1   4   5   28.78    1.13
   1   5   5   35.76    0.80
   1   6   5   68.36    1.17
   1   7   5  163.68    2.21
   1   8   5   31.46    0.86
   1   9   5   10.44    0.63
   1  10   5  240.35    3.18
   1  11   5  173.89    2.56
   1  12   5  100.20    1.82
   1  13   5   14.19    0.79
   1  14   5    0.09    0.57
   1  15   5   17.19    0.88
   1  16   5    6.58    0.70
   1  17   5  190.15    2.79
   1   0   6  194.70    3.36
   1   1   6   20.64    0.91
   1   2   6    9.26    0.53
   1   3   6   45.72    1.40
   1   4   6   53.58    1.02
   1   5   6  618.24    6.77
   1   6   6   49.06    1.04
   1   7   6  280.26    3.46
   1   8   6   23.59    0.80
   1   9   6    0.61    0.52
   1  10   6    0.34    0.54
   1  11   6   12.63    0.76
   1  12   6    0.94    0.57
   1  13   6    4.21    0.66
   1  14   6    4.12    0.66
   1  15   6   46.48    1.28
   1  16   6    0.20    0.57
   1   1   7    4.24    0.50
   1   2   7   36.78    0.94
   1   3   7    5.63    0.51
   1   4   7   -0.02    0.50
   1   5   7   98.54    1.60
   1   6   7   22.33    0.79
   1   7   7    3.84    0.56
   1   8   7   12.49    0.70
   1   9   7    0.34    0.53
   1  10   7  162.20    2.48
   1  11   7   66.15    1.47
   1  12   7   87.67    1.76
   1  13   7   69.42    1.56
   1  14   7    0.10    0.61
   1  15   7   85.65    1.74
   1  16   7    3.09    0.61
   1   0   8    4.72    0.89
   1   1   8   28.34    1.01
   1   2   8  145.45    2.16
   1   3   8    5.51    0.75
   1   4   8   82.75    1.47
   1   5   8    6.13    0.61
   1   6   8   84.00    1.55
   1   7   8  161.26    2.39
   1   8   8   46.08    1.18
   1   9   8   38.46    1.11
   1  10   8    4.86    0.66
   1  11   8    6.97    0.72
   1  12   8    0.70    0.63
   1  13   8    4.48    0.70
   1  14   8   -1.31    0.59
   1  15   8   27.49    1.01
   1   1   9   15.14    0.80
   1   2   9    8.98    0.76
   1   3   9   69.94    1.49
   1   4   9   27.62    1.01
   1   5   9  330.79    4.13
   1   6   9   26.89    0.97
   1   7   9    5.67    0.67
   1   8   9    1.87    0.63
   1   9   9    3.98    0.68
   1  10   9    2.70    0.65
   1  11   9   51.29    1.35
   1  12   9    3.70    0.69
   1  13   9   32.57    1.12
   1  14   9    5.22    0.70
   1   0  10  257.53    3.45
   1   1  10   50.69    1.30
   1   2  10   72.95    1.52
   1   3  10   18.08    0.87
   1   4  10   23.03    0.93
   1   5  10  193.56    2.80
   1   6  10   15.64    0.85
   1   7  10   27.08    1.02
   1   8  10   36.39    1.16
   1   9  10   17.98    0.91
   1  10  10    0.19    0.64
   1  11  10   10.86    0.81
   1  12  10   40.46    1.22
   1  13  10   11.76    0.80
   1  14  10   -1.06    0.59
   1   1  11    0.59    0.77
   1   2  11   49.88    1.36
   1   3  11   65.79    1.53
   1   4  11   14.61    0.92
   1   5  11  115.21    2.08
   1   6  11   20.21    0.94
   1   7  11    1.91    0.69
   1   8  11    4.03    0.73
   1   9  11   10.31    0.84
   1  10  11    0.42    0.66
   1  11  11   17.50    0.94
   1  12  11   47.50    1.28
   1   0  12    4.00    0.94
   1   1  12   69.39    1.69
   1   2  12    2.31    0.93
   1   3  12   16.56    1.12
   1   4  12    5.65    1.15
   1   5  12  300.87    4.10
   1   6  12    0.04    0.66
   1   7  12    0.43    0.68
   1   8  12    0.22    0.69
   1   9  12   -0.61    0.68
   1  10  12    5.43    0.79
   1  11  12   21.54    0.97
   1   1  13    8.41    1.03
   1   2  13    5.08    0.98
   1   3  13    3.27    0.96
   1   4  13   -0.14    0.96
   1   5  13    2.12    0.92
   1   6  13    0.56    0.98
   1   7  13   11.89    0.88
   1   8  13    1.52    0.73
   1   9  13    4.07    0.76
   1  10  13    9.39    0.95
   1   0  14   46.13    1.63
   1   1  14  118.64    2.36
   1   2  14   18.21    1.30
   1   3  14    6.67    1.12
   1   4  14    0.14    1.02
   1   5  14  168.44    2.89
   1   6  14    3.06    1.47
   1   7  14    2.84    1.04
   1   8  14    7.28    1.86
   1   1  15    6.49    2.01
   1   2  15   29.45    1.73
   1   3  15    3.04    1.00
   1   4  15    2.81    1.07
   1   5  15   23.48    1.48
   2   0   0 3674.12   52.62
   2   2   0   17.98    0.58
   2   4   0    2.24    0.21
   2   6   0  703.44    9.11
   2   8   0   34.68    0.78
   2  10   0   76.12    1.38
   2  12   0  109.61    1.84
   2  14   0    7.24    0.67
   2  16   0   73.62    1.61
   2  18   0    1.13    0.58
   2   1   1  819.92    8.49
   2   2   1 1291.63   11.88
   2   3   1 2504.11   26.73
   2   4   1   38.61    0.91
   2   5   1 1290.91   14.92
   2   6   1  120.98    2.27
   2   7   1  215.41    3.72
   2   8   1   12.70    0.52
   2   9   1    5.62    0.44
   2  10   1  154.39    2.20
   2  11   1   49.12    1.11
   2  12   1   -0.20    0.48
   2  13   1   -0.66    0.51
   2  14   1    9.34    0.71
   2  15   1   33.14    1.09
   2  16   1    9.76    0.76
   2  17   1  298.75    3.96
   2  18   1    0.63    0.57
   2   0   2 7220.14   65.36
   2   1   2  885.13    8.61
   2   2   2   40.40    0.85
   2   3   2  976.32   11.18
   2   4   2  630.36    7.82
   2   5   2  533.19    7.06
   2   6   2  381.28    5.40
   2   7   2  478.99    6.99
   2   8   2   44.45    0.89
   2   9   2   54.81    1.06
   2  10   2   99.79    1.64
   2  11   2   85.19    1.53
   2  12   2    1.75    0.52
   2  13   2    4.88    0.61
   2  14   2    0.10    0.54
   2  15   2   70.05    1.56
   2  16   2    3.57    0.66
   2  17   2   81.15    1.68
   2  18   2   -0.50    0.54
   2   1   3  102.40    1.76
   2   2   3   89.60    1.63
   2   3   3    0.54    0.32
   2   4   3  105.24    2.01
   2   5   3   27.06    1.08
   2   6   3    5.17    0.61
   2   7   3   41.32    0.85
   2   8   3   29.42    0.74
   2   9   3   11.09    0.55
   2  10   3  180.15    2.49
   2  11   3   89.40    1.59
   2  12   3    0.06    0.50
   2  13   3    2.92    0.58
   2  14   3    2.37    0.59
   2  15   3   46.69    1.28
   2  16   3   31.33    1.08
   2  17   3   19.05    0.89
   2   0   4  460.59    6.28
   2   1   4   87.44    1.63
   2   2   4  189.62    3.06
   2   3   4  109.29    2.11
   2   4   4  304.23    4.62
   2   5   4  466.46    6.66
   2   6   4  116.23    2.39
   2   7   4 1070.99   11.27
   2   8   4    5.65    0.48
   2   9   4    0.58    0.48
   2  10   4   46.09    1.07
   2  11   4  215.54    2.95
   2  12   4    7.33    0.65
   2  13   4   29.26    1.00
   2  14   4    4.50    0.65
   2  15   4  143.76    2.39
   2  16   4    0.74    0.60
   2  17   4   19.65    0.89
   2   1   5    4.19    0.59
   2   2   5    4.48    0.62
   2   3   5   22.90    1.00
   2   4   5   61.25    1.61
   2   5   5  422.50    4.72
   2   6   5    0.36    0.39
   2   7   5  255.10    3.15
   2   8   5    6.87    0.55
   2   9   5    9.50    0.62
   2  10   5   68.71    1.37
   2  11   5    1.97    0.54
   2  12   5    8.54    0.68
   2  13   5   43.43    1.20
   2  14   5    5.83    0.68
   2  15   5   72.90    1.60
   2  16   5   47.85    1.29
   2  17   5   41.21    1.16
   2   0   6  339.79    5.53
   2   1   6   88.77    1.95
   2   2   6   90.36    1.98
   2   3   6    9.75    0.54
   2   4   6    5.32    0.47
   2   5   6  103.54    1.59
   2   6   6   -0.35    0.45
   2   7   6  125.93    1.89
   2   8   6   65.28    1.29
   2   9   6   43.70    1.09
   2  10   6    2.05    0.56
   2  11   6   23.74    0.92
   2  12   6   48.87    1.26
   2  13   6    9.33    0.75
   2  14   6    1.81    0.61
   2  15   6   16.65    0.87
   2  16   6    3.17    0.63
   2   1   7    5.87    0.52
   2   2   7  114.31    1.70
   2   3   7  150.86    2.08
   2   4   7    4.84    0.56
   2   5   7  339.82    4.05
   2   6   7  216.06    2.84
   2   7   7  102.33    1.71
   2   8   7    2.68    0.55
   2   9   7    0.66    0.54
   2  10   7  116.19    1.99
   2  11   7    7.30    0.70
   2  12   7  105.98    1.96
   2  13   7    1.94    0.63
   2  14   7   26.88    1.04
   2  15   7   34.01    1.12
   2  16   7   71.79    1.53
   2   0   8   34.34    0.98
   2   1   8   85.86    1.63
   2   2   8    6.95    0.77
   2   3   8   42.58    1.17
   2   4   8   12.16    0.67
   2   5   8  657.78    7.34
   2   6   8   18.81    0.81
   2   7   8   31.76    0.98
   2   8   8    7.16    0.67
   2   9   8   23.87    0.92
   2  10   8    0.81    0.59
   2  11   8    0.49    0.61
   2  12   8   10.77    0.80
   2  13   8    2.21    0.66
   2  14   8    6.47    0.73
   2  15   8    9.58    0.74
   2   1   9    2.27    0.65
   2   2   9    6.94    0.77
   2   3   9  110.36    1.91
   2   4   9    0.14    0.59
   2   5   9   29.98    0.97
   2   6   9   20.30    0.89
   2   7   9   16.89    0.84
   2   8   9    1.78    0.63
   2   9   9   20.81    0.93
   2  10   9    0.77    0.61
   2  11   9   -0.87    0.60
   2  12   9   87.59    1.79
   2  13   9   22.73    0.98
   2  14   9    0.56    0.62
   2   0  10   74.50    1.54
   2   1  10    8.17    0.81
   2   2  10   25.51    1.02
   2   3  10   31.78    1.04
   2   4  10   36.21    1.10
   2   5  10  203.25    2.91
   2   6  10   64.40    1.46
   2   7  10   41.06    1.20
   2   8  10   -0.01    0.62
   2   9  10   13.36    0.86
   2  10  10   13.20    0.86
   2  11  10    3.16    0.68
   2  12  10   13.56    0.85
   2  13  10    4.26    0.68
   2  14  10   -0.12    0.61
   2   1  11   35.48    1.20
   2   2  11   12.25    0.92
   2   3  11    8.38    0.84
   2   4  11    0.28    0.72
   2   5  11  131.09    2.25
   2   6  11    2.30    0.67
   2   7  11   16.08    0.91
   2   8  11    0.09    0.66
   2   9  11   -0.90    0.66
   2  10  11    2.69    0.70
   2  11  11   18.17    0.95
   2  12  11   27.07    1.02
   2   0  12  118.84    2.20
   2   1  12   39.11    1.35
   2   2  12   60.88    1.62
   2   3  12   30.86    1.29
   2   4  12  130.19    2.41
   2   5  12   20.06    1.09
   2   6  12   74.57    1.66
   2   7  12   19.97    0.99
   2   8  12    2.47    0.73
   2   9  12    0.39    0.69
   2  10  12   30.12    1.14
   2  11  12    2.64    0.69
   2   1  13    1.65    0.93
   2   2  13   15.14    1.12
   2   3  13   16.64    1.14
   2   4  13    2.69    1.02
   2   5  13   99.82    2.16
   2   6  13   14.87    0.98
   2   7  13   10.05    0.85
   2   8  13    1.21    0.72
   2   9  13    0.62    0.70
   2  10  13    7.11    0.92
   2   0  14   12.12    1.11
   2   1  14   11.24    1.19
   2   2  14   34.29    1.49
   2   3  14   48.57    1.69
   2   4  14   13.31    1.19
   2   5  14   29.32    1.41
   2   6  14   28.23    1.89
   2   7  14    3.20    0.86
   2   8  14   14.36    1.16
   2   1  15   11.36    1.44
   2   2  15    8.60    3.03
   2   3  15    4.39    1.19
   2   4  15   -0.21    1.03
   2   5  15    8.24    1.24
   3   1   0  168.52    2.29
   3   3   0  526.94    6.43
   3   5   0  889.69   10.75
   3   7   0   94.76    2.03
   3   9   0    8.52    0.49
   3  11   0   13.40    0.66
   3  13   0   94.44    1.74
   3  15   0    3.14    0.63
   3  17   0   76.27    1.63
   3   1   1 1389.73   12.54
   3   2   1 1114.84   12.71
   3   3   1  281.09    3.76
   3   4   1  111.59    1.91
   3   5   1  296.99    4.33
   3   6   1  211.30    3.45
   3   7   1   16.60    0.83
   3   8   1  120.87    1.70
   3   9   1   14.47    0.57
   3  10   1 1254.58   13.26
   3  11   1   45.80    1.08
   3  12   1  138.79    2.16
   3  13   1   -0.74    0.51
   3  14   1    0.36    0.54
   3  15   1   46.78    1.27
   3  16   1   25.10    1.00
   3  17   1    1.99    0.62
   3  18   1   29.58    1.01
   3   0   2 8124.41   82.07
   3   1   2 1982.54   21.11
   3   2   2 2106.95   19.03
   3   3   2   48.20    1.09
   3   4   2   16.55    0.67
   3   5   2  865.16   10.70
   3   6   2   11.81    0.69
   3   7   2   -0.19    0.31
   3   8   2   22.66    0.64
   3   9   2  117.86    1.74
   3  10   2    3.01    0.54
   3  11   2    1.75    0.49
   3  12   2    6.77    0.61
   3  13   2   -1.75    0.49
   3  14   2   16.40    0.83
   3  15   2   -0.67    0.56
   3  16   2    5.12    0.68
   3  17   2    3.57    0.64
   3  18   2   -0.13    0.56
   3   1   3  305.91    4.17
   3   2   3    7.50    0.48
   3   3   3    0.77    0.32
   3   4   3  118.52    2.19
   3   5   3  207.45    3.43
   3   6   3   -0.25    0.37
   3   7   3   18.89    0.60
   3   8   3    2.06    0.37
   3   9   3   -0.42    0.38
   3  10   3   19.25    0.74
   3  11   3   18.01    0.75
   3  12   3    8.49    0.65
   3  13   3   17.09    0.82
   3  14   3    0.48    0.56
   3  15   3   40.85    1.21
   3  16   3   26.27    1.01
   3  17   3   -0.55    0.56
   3   0   4 7673.55   80.16
   3   1   4  431.72    4.88
   3   2   4  664.93    8.42
   3   3   4  115.48    2.23
   3   4   4  177.23    3.07
   3   5   4   69.97    1.66
   3   6   4  102.16    1.48
   3   7   4   25.26    0.69
   3   8   4   55.22    1.08
   3   9   4   12.03    0.65
   3  10   4   27.92    0.85
   3  11   4   55.02    1.24
   3  12   4    6.44    0.64
   3  13   4    6.92    0.66
   3  14   4   15.28    0.83
   3  15   4    4.73    0.67
   3  16   4   -0.24    0.58
   3  17   4    2.94    0.61
   3   1   5    2.51    0.45
   3   2   5    8.89    0.70
   3   3   5   15.25    0.88
   3   4   5    0.10    0.40
   3   5   5   32.47    0.76
   3   6   5   28.16    0.73
   3   7   5    3.13    0.46
   3   8   5   41.99    1.00
   3   9   5    0.11    0.49
   3  10   5  141.21    2.16
   3  11   5   10.39    0.68
   3  12   5  355.30    4.47
   3  13   5   18.75    0.86
   3  14   5   44.37    1.25
   3  15   5    9.09    0.75
   3  16   5   35.63    1.13
   3  17   5   16.97    0.83
   3   0   6  743.03    9.89
   3   1   6   14.95    0.74
   3   2   6   24.23    0.92
   3   3   6    1.06    0.47
   3   4   6  127.59    1.80
   3   5   6  133.10    1.89
   3   6   6  240.91    3.02
   3   7   6  109.16    1.72
   3   8   6    4.71    0.55
   3   9   6   48.72    1.15
   3  10   6   19.07    0.82
   3  11   6  105.54    1.88
   3  12   6   18.79    0.87
   3  13   6    1.21    0.59
   3  14   6   14.59    0.83
   3  15   6   17.89    0.89
   3  16   6   17.48    0.86
   3   1   7   17.29    0.71
   3   2   7   30.19    0.81
   3   3   7   78.72    1.35
   3   4   7   17.69    0.71
   3   5   7   49.97    1.09
   3   6   7   -0.18    0.48
   3   7   7  205.35    2.78
   3   8   7   31.73    0.94
   3   9   7   62.27    1.35
   3  10   7  295.65    3.86
   3  11   7  131.88    2.21
   3  12   7  229.88    3.28
   3  13   7   -0.30    0.59
   3  14   7   17.26    0.89
   3  15   7   22.64    0.96
   3  16   7    4.61    0.64
   3   0   8   70.87    1.41
   3   1   8    0.51    0.53
   3   2   8  400.75    4.70
   3   3   8    9.60    0.70
   3   4   8   57.69    1.20
   3   5   8    4.21    0.59
   3   6   8  229.06    3.07
   3   7   8    1.69    0.58
   3   8   8    0.78    0.55
   3   9   8    4.90    0.65
   3  10   8   20.11    0.90
   3  11   8   -0.20    0.59
   3  12   8   61.54    1.48
   3  13   8   12.34    0.83
   3  14   8   -1.43    0.59
   3  15   8   -1.34    0.55
   3   1   9   37.03    1.07
   3   2   9  108.45    1.87
   3   3   9    1.24    0.74
   3   4   9   50.11    1.21
   3   5   9   10.82    0.73
   3   6   9   36.66    1.10
   3   7   9   38.48    1.11
   3   8   9   -1.49    0.57
   3   9   9    2.13    0.64
   3  10   9   84.26    1.72
   3  11   9   16.71    0.89
   3  12   9   -0.14    0.62
   3  13   9    0.18    0.62
   3  14   9    4.67    0.69
   3   0  10   31.61    1.06
   3   1  10   60.99    1.39
   3   2  10  268.85    3.57
   3   3  10   21.94    0.91
   3   4  10  102.08    1.84
   3   5  10   14.13    0.80
   3   6  10   86.45    1.71
   3   7  10   14.48    0.86
   3   8  10   -1.35    0.60
   3   9  10   -1.87    0.61
   3  10  10   35.13    1.17
   3  11  10   33.92    1.14
   3  12  10   16.20    0.89
   3  13  10    0.18    0.61
   3   1  11    8.07    0.86
   3   2  11    0.51    0.76
   3   3  11    5.40    0.80
   3   4  11   34.03    1.19
   3   5  11    6.66    0.78
   3   6  11    1.13    0.65
   3   7  11    0.68    0.66
   3   8  11   24.15    1.03
   3   9  11    1.93    0.71
   3  10  11   29.05    1.10
   3  11  11    1.60    0.68
   3  12  11  107.13    1.96
   3   0  12    4.43    0.93
   3   1  12  120.03    2.23
   3   2  12    8.89    1.04
   3   3  12   43.88    1.46
   3   4  12   -1.18    0.88
   3   5  12   42.92    1.32
   3   6  12    0.89    0.67
   3   7  12   13.44    0.89
   3   8  12   35.08    1.20
   3   9  12   12.62    0.89
   3  10  12   15.23    0.93
   3  11  12   32.03    1.11
   3   1  13   28.80    1.28
   3   2  13    9.58    1.08
   3   3  13    4.74    1.04
   3   4  13    1.91    0.95
   3   5  13    8.94    1.04
   3   6  13   12.81    1.02
   3   7  13    2.86    0.73
   3   8  13   12.56    0.90
   3   9  13   -0.27    0.68
   3  10  13   11.97    0.97
   3   0  14   24.65    1.29
   3   1  14   12.50    1.22
   3   2  14   35.24    1.51
   3   3  14    1.50    1.18
   3   4  14    6.37    1.11
   3   5  14    5.94    1.08
   3   6  14   10.03    1.20
   3   7  14   38.72    1.73
   3   8  14   10.80    1.10
   3   1  15    5.60    1.25
   3   2  15    8.12    1.28
   3   3  15    1.17    1.14
   3   4  15    5.32    1.12
   4   0   0 3758.41   38.92
   4   2   0 3459.16   36.23
   4   4   0  140.64    2.36
   4   6   0  402.80    5.79
   4   8   0   25.21    0.68
   4  10   0   57.86    1.18
   4  12   0   17.35    0.77
   4  14   0   13.18    0.77
   4  16   0   22.55    0.96
   4  18   0    3.77    0.62
   4   1   1  597.38    6.88
   4   2   1  143.80    2.13
   4   3   1  678.41    8.07
   4   4   1   31.80    0.85
   4   5   1   83.82    1.72
   4   6   1   40.00    1.17
   4   7   1  278.98    4.49
   4   8   1   12.98    0.52
   4   9   1   44.80    0.95
   4  10   1  146.54    2.13
   4  11   1  264.01    3.39
   4  12   1  108.62    1.85
   4  13   1    2.13    0.50
   4  14   1   -0.77    0.52
   4  15   1   23.66    0.96
   4  16   1   13.37    0.82
   4  17   1  228.63    3.25
   4  18   1    0.19    0.56
   4   0   2  736.17    8.64
   4   1   2    1.35    0.24
   4   2   2  979.37   10.28
   4   3   2   18.41    0.65
   4   4   2   35.94    0.99
   4   5   2  260.86    3.96
   4   6   2  208.23    3.49
   4   7   2  710.06    9.64
   4   8   2    4.16    0.39
   4   9   2    4.29    0.44
   4  10   2   45.99    1.05
   4  11   2   50.96    1.15
   4  12   2   32.29    0.98
   4  13   2   89.67    1.53
   4  14   2   10.50    0.66
   4  15   2   74.58    1.61
   4  16   2   14.32    0.83
   4  17   2    0.97    0.59
   4  18   2    0.07    0.56
   4   1   3   76.99    1.48
   4   2   3    0.96    0.26
   4   3   3  352.24    4.88
   4   4   3   22.67    0.84
   4   5   3   16.91    0.85
   4   6   3   21.13    0.95
   4   7   3   21.15    0.62
   4   8   3   19.68    0.63
   4   9   3    2.69    0.44
   4  10   3  358.59    4.32
   4  11   3    6.46    0.58
   4  12   3  477.76    5.66
   4  13   3   43.91    1.05
   4  14   3   10.53    0.67
   4  15   3    1.53    0.61
   4  16   3   71.87    1.59
   4  17   3   74.22    1.58
   4   0   4  790.29   10.00
   4   1   4 1248.32   14.55
   4   2   4  128.12    2.35
   4   3   4  200.96    3.31
   4   4   4   14.33    0.82
   4   5   4  116.26    2.31
   4   6   4    1.38    0.35
   4   7   4  361.74    4.17
   4   8   4   22.94    0.71
   4   9   4  325.68    3.96
   4  10   4   26.51    0.84
   4  11   4   16.69    0.76
   4  12   4    5.92    0.63
   4  13   4    3.98    0.54
   4  14   4    8.30    0.64
   4  15   4   48.00    1.30
   4  16   4   -0.13    0.58
   4  17   4   20.20    0.89
   4   1   5    1.15    0.61
   4   2   5    0.49    0.60
   4   3   5  296.35    4.65
   4   4   5    3.68    0.64
   4   5   5  350.44    4.01
   4   6   5    4.92    0.44
   4   7   5    4.53    0.49
   4   8   5   -0.38    0.46
   4   9   5   21.55    0.79
   4  10   5   39.36    1.04
   4  11   5   51.18    1.22
   4  12   5  209.68    2.99
   4  13   5    2.70    0.54
   4  14   5    4.41    0.59
   4  15   5   85.66    1.75
   4  16   5   44.37    1.24
   4  17   5    7.15    0.68
   4   0   6 1401.20   17.80
   4   1   6  266.96    4.33
   4   2   6  362.75    5.55
   4   3   6    0.60    0.47
   4   4   6   35.45    0.83
   4   5   6  193.95    2.52
   4   6   6   44.39    0.99
   4   7   6  231.17    2.98
   4   8   6   -0.34    0.48
   4   9   6   26.12    0.87
   4  10   6    2.34    0.56
   4  11   6   97.00    1.79
   4  12   6    9.41    0.72
   4  13   6   33.06    0.98
   4  14   6    0.71    0.53
   4  15   6   24.71    0.99
   4  16   6    9.93    0.74
   4   1   7    9.32    0.62
   4   2   7   21.59    0.76
   4   3   7  202.03    2.62
   4   4   7   34.26    0.90
   4   5   7  152.57    2.18
   4   6   7   16.75    0.71
   4   7   7    5.89    0.60
   4   8   7   23.28    0.84
   4   9   7    1.64    0.55
   4  10   7   58.86    1.36
   4  11   7    0.21    0.58
   4  12   7    0.98    0.62
   4  13   7   -0.28    0.54
   4  14   7    7.04    0.66
   4  15   7   14.80    0.84
   4  16   7    2.37    0.60
   4   0   8  120.79    1.91
   4   1   8  102.24    1.70
   4   2   8   82.96    1.44
   4   3   8   26.89    0.86
   4   4   8    1.07    0.50
   4   5   8  305.60    3.81
   4   6   8   15.79    0.77
   4   7   8   22.88    0.89
   4   8   8    4.54    0.62
   4   9   8    5.43    0.65
   4  10   8   13.47    0.80
   4  11   8  112.33    2.03
   4  12   8    7.18    0.74
   4  13   8   12.20    0.75
   4  14   8   12.21    0.74
   4  15   8   -0.26    0.57
   4   1   9   42.88    1.16
   4   2   9   10.83    0.79
   4   3   9    0.71    0.66
   4   4   9   15.53    0.78
   4   5   9   14.59    0.79
   4   6   9   59.67    1.36
   4   7   9   42.59    1.17
   4   8   9   30.83    1.05
   4   9   9   13.60    0.82
   4  10   9  226.01    3.24
   4  11   9   66.28    1.54
   4  12   9   57.01    1.43
   4  13   9   -0.81    0.54
   4  14   9    4.40    0.61
   4   0  10  111.71    1.94
   4   1  10  229.01    3.15
   4   2  10    3.79    0.67
   4   3  10   16.37    0.84
   4   4  10    7.61    0.72
   4   5  10  444.68    5.37
   4   6  10   -0.35    0.61
   4   7  10   35.23    1.14
   4   8  10   30.12    1.08
   4   9  10    6.03    0.75
   4  10  10   29.13    1.08
   4  11  10   22.52    0.99
   4  12  10   10.13    0.79
   4  13  10   18.31    0.81
   4   1  11   22.14    1.04
   4   2  11   49.57    1.35
   4   3  11    7.38    0.80
   4   4  11    3.01    0.74
   4   5  11   25.24    1.05
   4   6  11   17.90    0.92
   4   7  11   13.23    0.87
   4   8  11    4.62    0.74
   4   9  11   -1.22    0.65
   4  10  11   59.90    1.48
   4  11  11    5.37    0.73
   4  12  11   13.60    0.83
   4   0  12  261.69    3.68
   4   1  12    6.71    0.99
   4   2  12   32.76    1.33
   4   3  12   -2.94    0.99
   4   4  12    7.88    1.00
   4   5  12    9.17    0.85
   4   6  12    0.78    0.68
   4   7  12    0.19    0.68
   4   8  12   12.17    0.88
   4   9  12    2.28    0.73
   4  10  12   10.67    0.87
   4  11  12   13.74    0.87
   4   1  13    4.00    0.93
   4   2  13   17.10    1.20
   4   3  13   12.65    1.13
   4   4  13   20.11    1.26
   4   5  13   76.38    1.80
   4   6  13    3.82    0.86
   4   7  13    0.57    0.70
   4   8  13    1.38    0.72
   4   9  13    8.62    0.82
   4   0  14  123.16    2.38
   4   1  14    0.80    1.01
   4   2  14    3.84    1.17
   4   3  14    0.88    1.17
   4   4  14   16.08    1.52
   4   5  14   17.43    1.27
   4   6  14   10.20    1.21
   4   7  14    9.23    1.70
   4   1  15    1.69    1.35
   4   2  15    4.99    1.22
   4   3  15   11.97    1.35
   4   4  15    4.34    1.58
   5   1   0 1507.40   16.92
   5   3   0   36.17    0.90
   5   5   0 3098.56   35.66
   5   7   0 1235.06   15.34
   5   9   0   57.30    1.09
   5  11   0  108.03    1.78
   5  13   0   55.39    1.30
   5  15   0  126.39    2.19
   5  17   0   29.75    1.05
   5   1   1  147.97    2.17
   5   2   1  120.43    1.91
   5   3   1   15.38    0.56
   5   4   1  485.52    6.30
   5   5   1   73.80    1.57
   5   6   1    0.75    0.33
   5   7   1  231.20    3.86
   5   8   1   19.19    0.60
   5   9   1   33.10    0.82
   5  10   1  120.96    1.87
   5  11   1   43.86    1.06
   5  12   1  131.72    2.10
   5  13   1   24.04    0.91
   5  14   1   -0.10    0.54
   5  15   1    0.05    0.57
   5  16   1  196.63    2.95
   5  17   1   20.53    0.92
   5  18   1    6.55    0.67
   5   0   2  525.62    6.34
   5   1   2  105.83    1.75
   5   2   2   19.91    0.80
   5   3   2  178.65    2.76
   5   4   2   -0.17    0.36
   5   5   2  304.80    4.57
   5   6   2  356.68    5.35
   5   7   2  119.61    1.67
   5   8   2   16.41    0.57
   5   9   2   22.34    0.70
   5  10   2   13.78    0.64
   5  11   2    0.14    0.47
   5  12   2    5.50    0.59
   5  13   2   -0.72    0.51
   5  14   2   13.40    0.78
   5  15   2   13.01    0.81
   5  16   2   37.85    1.17
   5  17   2   42.65    1.21
   5   1   3  120.65    2.07
   5   2   3    0.38    0.32
   5   3   3  833.46   10.19
   5   4   3   32.48    1.05
   5   5   3 1246.83   15.10
   5   6   3   42.56    1.27
   5   7   3  137.19    1.87
   5   8   3    1.72    0.38
   5   9   3   -0.14    0.49
   5  10   3   73.49    1.38
   5  11   3   -0.22    0.47
   5  12   3   54.96    1.28
   5  13   3   12.76    0.75
   5  14   3    0.24    0.56
   5  15   3  109.47    2.01
   5  16   3   64.00    1.49
   5  17   3  133.10    2.23
   5   0   4 1034.16   12.41
   5   1   4    4.92    0.76
   5   2   4   65.93    1.56
   5   3   4   88.94    1.90
   5   4   4   60.85    1.54
   5   5   4  159.24    2.92
   5   6   4  595.32    6.47
   5   7   4  108.71    1.61
   5   8   4   12.72    0.58
   5   9   4    0.23    0.46
   5  10   4   64.60    1.30
   5  11   4   35.77    1.01
   5  12   4   21.59    0.87
   5  13   4   -0.85    0.51
   5  14   4    7.43    0.71
   5  15   4   21.44    0.94
   5  16   4   45.75    1.27
   5  17   4    5.98    0.66
   5   1   5   97.33    2.06
   5   2   5   10.19    0.80
   5   3   5  605.55    8.32
   5   4   5   39.74    1.28
   5   5   5  513.01    5.66
   5   6   5  127.80    1.81
   5   7   5   14.10    0.62
   5   8   5    1.36    0.48
   5   9   5   29.18    0.89
   5  10   5   31.93    0.96
   5  11   5   25.76    0.92
   5  12   5    8.63    0.68
   5  13   5    0.67    0.56
   5  14   5    3.73    0.65
   5  15   5   49.23    1.31
   5  16   5    0.33    0.58
   5  17   5   44.23    1.19
   5   0   6  709.84    9.60
   5   1   6  127.33    2.57
   5   2   6   75.81    1.25
   5   3   6  289.62    3.42
   5   4   6  156.12    2.11
   5   5   6  159.12    2.18
   5   6   6  323.41    3.87
   5   7   6  187.59    2.54
   5   8   6    9.62    0.64
   5   9   6   94.95    1.68
   5  10   6  106.55    1.85
   5  11   6    9.76    0.71
   5  12   6   66.44    1.49
   5  13   6   20.06    0.91
   5  14   6    0.98    0.60
   5  15   6   46.22    1.27
   5  16   6   12.32    0.77
   5   1   7   72.05    1.29
   5   2   7    5.72    0.56
   5   3   7   17.98    0.71
   5   4   7   48.29    1.05
   5   5   7  106.91    1.72
   5   6   7   33.56    0.93
   5   7   7   10.24    0.66
   5   8   7    5.22    0.59
   5   9   7    0.36    0.53
   5  10   7    0.11    0.55
   5  11   7    5.03    0.67
   5  12   7    0.26    0.59
   5  13   7   -1.09    0.58
   5  14   7    0.41    0.61
   5  15   7   55.36    1.38
   5  16   7   10.08    0.73
   5   0   8  452.61    5.19
   5   1   8   76.82    1.37
   5   2   8   62.95    1.24
   5   3   8   26.74    0.87
   5   4   8  210.40    2.81
   5   5   8  232.80    3.08
   5   6   8   95.88    1.69
   5   7   8  235.65    3.19
   5   8   8   34.06    1.03
   5   9   8    0.76    0.56
   5  10   8   97.21    1.84
   5  11   8   11.21    0.79
   5  12   8   65.76    1.53
   5  13   8   25.41    1.03
   5  14   8   14.57    0.86
   5  15   8   43.59    1.21
   5   1   9    0.38    0.66
   5   2   9    1.43    0.62
   5   3   9   11.05    0.81
   5   4   9    4.53    0.65
   5   5   9  148.31    2.29
   5   6   9    7.07    0.68
   5   7   9  163.54    2.51
   5   8   9    0.99    0.62
   5   9   9    2.07    0.63
   5  10   9   34.73    1.13
   5  11   9   19.25    0.93
   5  12   9    6.33    0.74
   5  13   9    5.04    0.71
   5  14   9   -0.20    0.60
   5   0  10  171.74    2.29
   5   1  10   27.06    0.99
   5   2  10   34.85    1.07
   5   3  10   65.88    1.45
   5   4  10  131.25    2.16
   5   5  10    8.06    0.73
   5   6  10   28.51    1.03
   5   7  10   -0.92    0.61
   5   8  10    7.94    0.77
   5   9  10   -0.15    0.63
   5  10  10   41.85    1.25
   5  11  10   10.30    0.80
   5  12  10   21.30    0.96
   5  13  10    7.78    0.73
   5   1  11   13.90    0.92
   5   2  11   13.75    0.88
   5   3  11   10.50    0.87
   5   4  11    0.72    0.68
   5   5  11   44.08    1.29
   5   6  11   45.78    1.29
   5   7  11   31.39    1.12
   5   8  11   -0.96    0.64
   5   9  11    2.16    0.70
   5  10  11   38.99    1.23
   5  11  11    9.95    0.80
   5  12  11   13.26    0.82
   5   0  12    5.67    0.99
   5   1  12   -1.63    0.89
   5   2  12    8.15    1.02
   5   3  12    9.16    1.07
   5   4  12   14.81    1.01
   5   5  12  119.26    2.18
   5   6  12   11.14    0.85
   5   7  12   98.73    1.94
   5   8  12   -0.02    0.68
   5   9  12   -0.71    0.68
   5  10  12    3.33    0.73
   5  11  12   19.27    0.96
   5   1  13   -0.38    0.91
   5   2  13   -1.28    0.79
   5   3  13   27.24    1.27
   5   4  13    2.11    1.01
   5   5  13    4.39    0.84
   5   6  13   47.87    1.43
   5   7  13   47.01    1.35
   5   8  13    0.44    0.70
   5   9  13   28.66    1.10
   5   0  14    5.44    1.09
   5   1  14    5.72    1.11
   5   2  14   -1.78    1.27
   5   3  14    3.50    1.16
   5   4  14    0.89    1.89
   5   5  14    3.22    1.21
   5   6  14    0.66    1.41
   5   7  14   16.46    1.12
   5   1  15    4.82    1.34
   5   2  15   -0.06    1.24
   5   3  15    6.29    1.35
   5   4  15    1.72    3.94
   6   0   0 5159.27   53.61
   6   2   0 2285.98   25.45
   6   4   0  196.04    3.13
   6   6   0   13.48    0.80
   6   8   0   -0.63    0.32
   6  10   0   13.22    0.65
   6  12   0    0.20    0.50
   6  14   0   89.10    1.75
   6  16   0   15.13    0.85
   6   1   1  739.93    8.58
   6   2   1  245.02    3.41
   6   3   1    7.72    0.44
   6   4   1   16.63    0.76
   6   5   1  592.88    7.80
   6   6   1    7.78    0.69
   6   7   1   48.66    0.92
   6   8   1   28.70    0.72
   6   9   1    4.93    0.46
   6  10   1  174.36    2.42
   6  11   1   75.94    1.44
   6  12   1   51.22    1.21
   6  13   1   58.72    1.35
   6  14   1   -0.92    0.52
   6  15   1  120.22    2.13
   6  16   1   -0.36    0.57
   6  17   1   10.56    0.76
   6   0   2 2122.53   23.99
   6   1   2  796.12    9.33
   6   2   2  424.47    5.50
   6   3   2   28.91    0.88
   6   4   2    0.75    0.32
   6   5   2 1375.01   16.39
   6   6   2    7.31    0.60
   6   7   2   92.82    1.40
   6   8   2   28.30    0.73
   6   9   2  207.49    2.69
   6  10   2    4.18    0.53
   6  11   2   84.17    1.54
   6  12   2    7.27    0.63
   6  13   2    2.08    0.57
   6  14   2   31.18    1.05
   6  15   2   16.30    0.86
   6  16   2   -0.58    0.57
   6  17   2   19.10    0.89
   6   1   3  119.48    2.09
   6   2   3   50.38    1.22
   6   3   3  148.06    2.56
   6   4   3  165.04    2.88
   6   5   3  217.84    3.62
   6   6   3   17.50    0.78
   6   7   3  235.92    2.88
   6   8   3   56.60    1.08
   6   9   3  110.07    1.74
   6  10   3  404.89    4.81
   6  11   3  241.20    3.21
   6  12   3  252.85    3.40
   6  13   3   -0.73    0.52
   6  14   3   14.63    0.82
   6  15   3   79.34    1.67
   6  16   3   -0.93    0.56
   6  17   3   27.58    1.00
   6   0   4  201.91    3.46
   6   1   4  105.33    2.06
   6   2   4  179.43    3.03
   6   3   4   84.78    1.88
   6   4   4   18.69    0.91
   6   5   4  557.72    7.87
   6   6   4    2.78    0.47
   6   7   4   15.22    0.60
   6   8   4    0.25    0.40
   6   9   4    5.61    0.53
   6  10   4   -0.00    0.46
   6  11   4    1.60    0.52
   6  12   4    3.56    0.59
   6  13   4  121.97    2.10
   6  14   4   -2.27    0.52
   6  15   4   -1.28    0.56
   6  16   4    0.42    0.59
   6  17   4  103.51    1.88
   6   1   5  329.47    5.04
   6   2   5    2.16    0.54
   6   3   5   27.04    1.07
   6   4   5  119.35    1.66
   6   5   5  156.37    2.08
   6   6   5   16.72    0.62
   6   7   5   54.54    1.09
   6   8   5    0.84    0.48
   6   9   5    1.69    0.52
   6  10   5  118.36    1.94
   6  11   5    2.27    0.57
   6  12   5   86.10    1.68
   6  13   5    0.08    0.55
   6  14   5    4.63    0.67
   6  15   5   26.08    1.01
   6  16   5    0.64    0.59
   6  17   5   82.99    1.64
   6   0   6 1138.46   14.94
   6   1   6  655.64    7.07
   6   2   6  362.08    4.14
   6   3   6   78.35    1.29
   6   4   6   -0.59    0.41
   6   5   6  437.13    4.99
   6   6   6    0.95    0.46
   6   7   6   42.15    1.01
   6   8   6   54.31    1.20
   6   9   6   36.94    1.02
   6  10   6    1.58    0.56
   6  11   6   82.82    1.64
   6  12   6   43.79    1.21
   6  13   6    0.08    0.58
   6  14   6   14.90    0.85
   6  15   6    1.93    0.62
   6  16   6    0.66    0.57
   6   1   7  144.08    2.05
   6   2   7    4.35    0.56
   6   3   7   12.55    0.65
   6   4   7   15.09    0.69
   6   5   7  158.80    2.25
   6   6   7   18.56    0.75
   6   7   7   20.95    0.81
   6   8   7   23.60    0.86
   6   9   7    2.61    0.57
   6  10   7   -0.45    0.55
   6  11   7    0.61    0.59
   6  12   7   16.58    0.88
   6  13   7   -1.26    0.58
   6  14   7   17.61    0.90
   6  15   7   23.46    0.96
   6  16   7    4.18    0.64
   6   0   8  169.00    2.34
   6   1   8  526.11    5.95
   6   2   8   77.38    1.42
   6   3   8  184.52    2.55
   6   4   8   12.88    0.70
   6   5   8  114.55    1.87
   6   6   8    4.38    0.61
   6   7   8  104.89    1.84
   6   8   8    4.80    0.64
   6   9   8   21.01    0.89
   6  10   8    7.47    0.71
   6  11   8  205.95    3.04
   6  12   8    1.09    0.64
   6  13   8   15.75    0.89
   6  14   8   26.74    1.03
   6  15   8   14.73    0.82
   6   1   9   24.97    0.92
   6   2   9   71.53    1.47
   6   3   9   10.24    0.75
   6   4   9    1.57    0.58
   6   5   9    1.43    0.62
   6   6   9   -0.81    0.56
   6   7   9    0.21    0.59
   6   8   9   58.66    1.40
   6   9   9   11.31    0.79
   6  10   9   97.50    1.88
   6  11   9    0.64    0.62
   6  12   9   85.42    1.77
   6  13   9   -0.12    0.62
   6  14   9   13.77    0.83
   6   0  10   -0.29    0.58
   6   1  10   23.51    0.92
   6   2  10   11.39    0.78
   6   3  10   -0.96    0.64
   6   4  10    2.89    0.67
   6   5  10    1.99    0.64
   6   6  10    7.02    0.73
   6   7  10  190.87    2.87
   6   8  10    1.91    0.67
   6   9  10    3.43    0.70
   6  10  10    2.10    0.67
   6  11  10  170.72    2.69
   6  12  10    1.02    0.64
   6  13  10    0.98    0.62
   6   1  11    4.98    0.76
   6   2  11   58.79    1.42
   6   3  11   15.48    0.90
   6   4  11    7.39    0.80
   6   5  11    6.87    0.74
   6   6  11    0.47    0.65
   6   7  11  150.86    2.49
   6   8  11   15.95    0.93
   6   9  11   66.43    1.57
   6  10  11   42.47    1.27
   6  11  11   78.23    1.67
   6  12  11   30.95    1.06
   6   0  12   38.50    1.38
   6   1  12    5.92    0.99
   6   2  12   63.91    1.63
   6   3  12    2.48    0.81
   6   4  12   20.52    1.08
   6   5  12   36.22    1.24
   6   6  12    3.01    0.73
   6   7  12    9.05    0.82
   6   8  12   -0.78    0.67
   6   9  12   20.70    1.01
   6  10  12   -1.52    0.64
   6  11  12    0.26    0.69
   6   1  13    8.06    1.03
   6   2  13   -2.27    0.89
   6   3  13    2.54    1.82
   6   4  13    5.84    0.91
   6   5  13    1.80    0.82
   6   6  13    2.75    0.84
   6   7  13   37.51    1.23
   6   8  13    0.50    0.70
   6   9  13    5.13    0.80
   6   0  14   38.90    1.52
   6   1  14    2.64    1.11
   6   2  14   22.73    1.60
   6   3  14   11.09    1.66
   6   4  14    1.18    1.05
   6   5  14   18.82    1.38
   6   6  14    1.93    0.83
   6   7  14    7.12    1.24
   6   1  15   -2.37    1.21
   6   2  15   -1.29    1.28
   6   3  15    3.97    1.45
   6   4  15   10.80    3.98
   7   1   0 1063.22   12.77
   7   3   0   83.98    1.65
   7   5   0   71.70    1.66
   7   7   0  175.42    2.24
   7   9   0  322.92    3.86
   7  11   0   60.77    1.28
   7  13   0   53.89    1.30
   7  15   0    7.18    0.71
   7  17   0    0.98    0.59
   7   1   1    4.32    0.36
   7   2   1   13.56    0.54
   7   3   1  529.72    6.79
   7   4   1   63.73    1.44
   7   5   1  103.28    2.03
   7   6   1    0.63    0.39
   7   7   1   38.47    0.82
   7   8   1   13.34    0.54
   7   9   1   13.30    0.59
   7  10   1  197.60    2.68
   7  11   1    7.28    0.59
   7  12   1  731.30    8.19
   7  13   1    3.49    0.60
   7  14   1    4.40    0.63
   7  15   1    5.48    0.68
   7  16   1  194.81    2.92
   7  17   1   12.01    0.78
   7   0   2 1109.66   12.70
   7   1   2   22.35    0.73
   7   2   2 1739.18   16.98
   7   3   2   28.17    0.94
   7   4   2  119.49    2.23
   7   5   2    1.11    0.34
   7   6   2  353.31    5.42
   7   7   2  246.52    2.98
   7   8   2   43.03    0.92
   7   9   2    8.99    0.61
   7  10   2   45.13    1.06
   7  11   2    1.04    0.49
   7  12   2    6.84    0.63
   7  13   2   93.34    1.76
   7  14   2    7.96    0.70
   7  15   2   10.28    0.77
   7  16   2    5.98    0.70
   7  17   2    6.35    0.68
   7   1   3  659.32    8.34
   7   2   3  140.54    2.46
   7   3   3  537.04    7.18
   7   4   3   17.91    0.89
   7   5   3   23.45    0.92
   7   6   3  225.66    2.74
   7   7   3    0.40    0.34
   7   8   3   23.81    0.71
   7   9   3    0.07    0.50
   7  10   3  115.77    1.85
   7  11   3   21.70    0.82
   7  12   3  101.43    1.82
   7  13   3   -0.57    0.52
   7  14   3   15.02    0.74
   7  15   3    2.52    0.63
   7  16   3   71.91    1.58
   7  17   3   33.51    1.07
   7   0   4  892.94   10.86
   7   1   4   18.66    0.88
   7   2   4 1056.35   12.98
   7   3   4    1.58    0.42
   7   4   4    1.61    0.37
   7   5   4   11.63    0.49
   7   6   4  458.08    5.13
   7   7   4    2.66    0.44
   7   8   4   73.11    1.33
   7   9   4   37.68    0.97
   7  10   4   88.24    1.58
   7  11   4   56.25    1.27
   7  12   4  175.65    2.63
   7  13   4    0.15    0.54
   7  14   4   10.85    0.77
   7  15   4    0.03    0.59
   7  16   4   53.80    1.36
   7  17   4    2.29    0.60
   7   1   5  170.30    3.06
   7   2   5   14.72    0.84
   7   3   5   86.24    1.95
   7   4   5   13.09    0.54
   7   5   5    5.65    0.45
   7   6   5   20.87    0.69
   7   7   5   23.91    0.76
   7   8   5   29.92    0.86
   7   9   5   32.98    0.95
   7  10   5  241.52    3.23
   7  11   5   62.41    1.38
   7  12   5  112.62    1.98
   7  13   5    0.14    0.56
   7  14   5   20.59    0.93
   7  15   5   17.18    0.88
   7  16   5    1.38    0.60
   7   0   6  372.45    4.25
   7   1   6   74.46    1.24
   7   2   6  104.76    1.56
   7   3   6   24.99    0.72
   7   4   6  161.19    2.18
   7   5   6  106.31    1.65
   7   6   6  204.96    2.69
   7   7   6  113.06    1.79
   7   8   6   21.16    0.81
   7   9   6   16.07    0.76
   7  10   6  163.83    2.48
   7  11   6   40.03    1.14
   7  12   6   57.99    1.39
   7  13   6   78.70    1.66
   7  14   6   32.48    1.10
   7  15   6   19.46    0.91
   7  16   6    3.48    0.62
   7   1   7  135.02    1.94
   7   2   7   27.69    0.82
   7   3   7   50.00    1.07
   7   4   7    0.88    0.56
   7   5   7    0.62    0.49
   7   6   7   15.80    0.72
   7   7   7   12.22    0.70
   7   8   7   12.91    0.72
   7   9   7    7.20    0.68
   7  10   7  176.30    2.65
   7  11   7   -0.80    0.57
   7  12   7  186.02    2.83
   7  13   7    1.12    0.63
   7  14   7    7.17    0.73
   7  15   7   -0.95    0.56
   7   0   8 1548.66   16.21
   7   1   8   33.43    0.95
   7   2   8   18.85    0.78
   7   3   8   14.79    0.71
   7   4   8  229.49    3.04
   7   5   8    3.38    0.60
   7   6   8   54.28    1.25
   7   7   8   16.86    0.80
   7   8   8    4.05    0.64
   7   9   8   58.78    1.37
   7  10   8  119.06    2.09
   7  11   8   18.54    0.92
   7  12   8    8.37    0.76
   7  13   8    4.10    0.70
   7  14   8   12.99    0.82
   7  15   8    3.40    0.64
   7   1   9   73.22    1.49
   7   2   9  133.88    2.14
   7   3   9   33.46    1.05
   7   4   9    8.61    0.71
   7   5   9   57.02    1.33
   7   6   9    2.98    0.63
   7   7   9    1.63    0.62
   7   8   9    0.10    0.59
   7   9   9   30.55    1.07
   7  10   9    3.61    0.68
   7  11   9   10.37    0.79
   7  12   9   21.56    0.97
   7  13   9   -0.50    0.61
   7  14   9    2.42    0.64
   7   0  10  516.18    6.06
   7   1  10   24.94    0.96
   7   2  10   30.01    1.05
   7   3  10    2.17    0.65
   7   4  10   18.25    0.89
   7   5  10   11.32    0.79
   7   6  10   14.38    0.85
   7   7  10    3.33    0.68
   7   8  10    6.74    0.76
   7   9  10    0.73    0.65
   7  10  10   14.99    0.88
   7  11  10   16.26    0.90
   7  12  10    9.43    0.78
   7  13  10   -0.21    0.59
   7   1  11    9.19    0.80
   7   2  11    1.68    0.69
   7   3  11   25.16    1.04
   7   4  11   10.66    0.84
   7   5  11   36.35    1.16
   7   6  11   92.66    1.85
   7   7  11    0.08    0.66
   7   8  11   20.51    0.99
   7   9  11    6.84    0.78
   7  10  11  195.44    2.96
   7  11  11    6.14    0.74
   7  12  11    0.99    0.62
   7   0  12   84.40    1.80
   7   1  12    5.18    0.83
   7   2  12   -0.38    0.76
   7   3  12    3.49    0.84
   7   4  12   33.41    1.18
   7   5  12    7.00    0.83
   7   6  12   23.95    1.04
   7   7  12    1.67    0.71
   7   8  12   44.01    1.31
   7   9  12   41.40    1.28
   7  10  12   -0.84    0.66
   7  11  12   57.33    1.44
   7   1  13   -1.08    0.92
   7   2  13    5.86    1.20
   7   3  13   10.92    1.03
   7   4  13    2.01    1.12
   7   5  13    0.25    0.75
   7   6  13   31.30    1.15
   7   7  13   11.47    0.88
   7   8  13   10.54    0.86
   7   9  13    3.23    0.81
   7   0  14   38.83    1.51
   7   1  14   25.14    1.34
   7   2  14   15.15    2.19
   7   3  14    0.45    1.87
   7   4  14    4.50    0.93
   7   5  14   49.08    2.21
   7   6  14    5.41    0.90
   7   7  14    2.14    1.21
   7   1  15   20.98    1.66
   7   2  15    8.20    1.51
   7   3  15    3.23    1.23
   8   0   0  578.39    7.22
   8   2   0  515.80    6.71
   8   4   0   52.46    1.33
   8   6   0  971.16   12.69
   8   8   0  190.11    2.46
   8  10   0   44.07    1.05
   8  12   0   -0.05    0.51
   8  14   0   21.33    0.91
   8  16   0   35.52    1.13
   8   1   1    0.87    0.51
   8   2   1  136.51    2.27
   8   3   1  878.54   10.70
   8   4   1  185.63    3.07
   8   5   1 1121.18   13.79
   8   6   1  266.08    4.31
   8   7   1   -0.08    0.35
   8   8   1    0.81    0.37
   8   9   1   39.41    0.97
   8  10   1   73.23    1.38
   8  11   1   83.73    1.55
   8  12   1   13.62    0.74
   8  13   1   20.88    0.88
   8  14   1   14.72    0.81
   8  15   1  148.13    2.43
   8  16   1   12.74    0.81
   8  17   1    8.31    0.71
   8   0   2    0.16    0.28
   8   1   2   26.44    0.85
   8   2   2  127.19    2.24
   8   3   2  101.45    1.95
   8   4   2   38.46    1.12
   8   5   2  622.63    8.51
   8   6   2  403.19    4.52
   8   7   2  167.03    1.95
   8   8   2   27.65    0.75
   8   9   2   34.88    0.93
   8  10   2   17.69    0.72
   8  11   2   10.58    0.66
   8  12   2   82.90    1.61
   8  13   2   -0.71    0.52
   8  14   2   13.74    0.80
   8  15   2   24.61    0.99
   8  16   2   53.36    1.36
   8  17   2   54.58    1.34
   8   1   3   25.10    0.88
   8   2   3   96.24    1.91
   8   3   3    0.50    0.42
   8   4   3  440.79    6.28
   8   5   3   22.40    0.95
   8   6   3   99.49    1.48
   8   7   3    2.83    0.39
   8   8   3    1.75    0.41
   8   9   3    0.41    0.43
   8  10   3    2.90    0.51
   8  11   3   16.18    0.76
   8  12   3  118.68    2.02
   8  13   3   12.70    0.76
   8  14   3    0.65    0.58
   8  15   3    1.30    0.61
   8  16   3  113.77    2.05
   8  17   3   22.02    0.91
   8   0   4  267.99    4.40
   8   1   4  396.31    5.71
   8   2   4    0.47    0.41
   8   3   4    0.77    0.38
   8   4   4   33.46    1.15
   8   5   4 1223.80   12.76
   8   6   4    0.06    0.36
   8   7   4  261.42    3.22
   8   8   4   97.68    1.61
   8   9   4    3.81    0.52
   8  10   4   21.85    0.81
   8  11   4   11.76    0.70
   8  12   4   52.53    1.28
   8  13   4   19.97    0.88
   8  14   4    5.06    0.68
   8  15   4   36.59    1.15
   8  16   4    1.80    0.61
   8  17   4   27.43    0.98
   8   1   5   24.14    1.00
   8   2   5   24.58    1.03
   8   3   5   55.95    1.02
   8   4   5   93.23    1.43
   8   5   5  136.90    1.90
   8   6   5    8.68    0.55
   8   7   5  157.31    2.22
   8   8   5    1.89    0.51
   8   9   5    1.05    0.51
   8  10   5   70.21    1.43
   8  11   5   43.92    1.17
   8  12   5   71.94    1.53
   8  13   5    1.19    0.58
   8  14   5   12.20    0.80
   8  15   5    7.30    0.72
   8  16   5   98.40    1.85
   8   0   6  576.44    6.31
   8   1   6  281.43    3.36
   8   2   6    4.57    0.46
   8   3   6   31.75    0.81
   8   4   6  329.04    3.90
   8   5   6  249.45    3.12
   8   6   6   79.44    1.41
   8   7   6    5.69    0.57
   8   8   6   -0.23    0.50
   8   9   6    7.61    0.65
   8  10   6   15.73    0.80
   8  11   6   65.92    1.46
   8  12   6    3.74    0.63
   8  13   6    0.41    0.59
   8  14   6   30.87    1.08
   8  15   6    0.31    0.59
   8  16   6   67.55    1.48
   8   1   7    8.14    0.60
   8   2   7  288.59    3.52
   8   3   7  140.54    2.04
   8   4   7   -0.08    0.50
   8   5   7  236.49    3.07
   8   6   7   -0.10    0.51
   8   7   7   37.79    1.02
   8   8   7    6.79    0.64
   8   9   7    7.07    0.68
   8  10   7   21.02    0.90
   8  11   7    2.56    0.63
   8  12   7   -1.25    0.58
   8  13   7    0.80    0.62
   8  14   7    3.96    0.67
   8  15   7   20.98    0.91
   8   0   8   39.87    1.05
   8   1   8  113.22    1.82
   8   2   8    5.16    0.57
   8   3   8   35.99    0.99
   8   4   8    4.64    0.61
   8   5   8   -1.14    0.52
   8   6   8   65.41    1.39
   8   7   8  236.01    3.21
   8   8   8   14.74    0.81
   8   9   8   36.82    1.11
   8  10   8    7.91    0.72
   8  11   8   69.87    1.58
   8  12   8    0.16    0.62
   8  13   8    3.24    0.68
   8  14   8   -1.34    0.57
   8  15   8   47.00    1.24
   8   1   9    3.56    0.72
   8   2   9    9.80    0.74
   8   3   9   73.05    1.47
   8   4   9   19.46    0.87
   8   5   9   74.34    1.52
   8   6   9  166.66    2.53
   8   7   9   30.36    1.04
   8   8   9    6.26    0.70
   8   9   9   29.65    1.06
   8  10   9  122.55    2.17
   8  11   9   23.65    1.00
   8  12   9   -0.89    0.61
   8  13   9    1.39    0.64
   8  14   9    9.33    0.76
   8   0  10  136.02    2.22
   8   1  10   76.17    1.59
   8   2  10   -0.95    0.64
   8   3  10   29.20    1.04
   8   4  10   20.09    0.90
   8   5  10   -0.14    0.61
   8   6  10    2.91    0.68
   8   7  10  155.66    2.50
   8   8  10   40.97    1.24
   8   9  10   99.92    1.93
   8  10  10   21.09    0.97
   8  11  10    8.88    0.78
   8  12  10   23.19    0.98
   8  13  10    0.35    0.61
   8   1  11   -0.22    0.66
   8   2  11    9.06    0.81
   8   3  11   10.10    0.85
   8   4  11   -0.42    0.66
   8   5  11   13.88    0.86
   8   6  11   60.05    1.48
   8   7  11   35.72    1.19
   8   8  11    3.32    0.73
   8   9  11    0.95    0.68
   8  10  11   25.88    1.04
   8  11  11   15.93    0.88
   8  12  11    2.02    0.65
   8   0  12   73.08    1.70
   8   1  12    0.52    0.78
   8   2  12    1.34    0.80
   8   3  12    5.93    0.85
   8   4  12   12.03    0.89
   8   5  12   -0.37    0.72
   8   6  12    0.16    0.67
   8   7  12   34.73    1.20
   8   8  12   80.07    1.55
   8   9  12   11.63    0.89
   8  10  12   12.31    0.86
   8   1  13   10.56    0.92
   8   2  13    1.84    0.79
   8   3  13   19.85    1.05
   8   4  13   21.20    1.21
   8   5  13   18.12    1.11
   8   6  13   19.48    1.14
   8   7  13   34.12    1.19
   8   8  13    1.62    0.71
   8   9  13   -1.47    0.80
   8   0  14  105.54    2.21
   8   1  14    6.85    1.39
   8   2  14   17.26    1.17
   8   3  14   18.62    1.19
   8   4  14   77.40    2.00
   8   5  14    5.05    1.10
   8   6  14   15.67    1.33
   8   1  15   11.47    1.59
   8   2  15   23.73    2.30
   8   3  15   15.19    2.01
   9   1   0  447.37    5.99
   9   3   0  153.02    2.69
   9   5   0 1436.58   17.58
   9   7   0   10.04    0.48
   9   9   0   44.15    1.03
   9  11   0   19.03    0.78
   9  13   0  118.45    2.05
   9  15   0   18.63    0.90
   9  17   0  114.19    2.02
   9   1   1  298.92    4.22
   9   2   1    0.47    0.38
   9   3   1   16.27    0.71
   9   4   1  431.11    6.07
   9   5   1  193.65    3.36
   9   6   1  478.98    5.28
   9   7   1   16.04    0.56
   9   8   1    2.35    0.40
   9   9   1    2.18    0.52
   9  10   1    4.56    0.52
   9  11   1    7.10    0.61
   9  12   1  252.83    3.41
   9  13   1    1.40    0.56
   9  14   1   31.26    1.06
   9  15   1   33.09    1.10
   9  16   1   13.70    0.82
   9  17   1    6.01    0.67
   9   0   2  818.23   11.00
   9   1   2  419.64    5.73
   9   2   2  293.25    4.35
   9   3   2    0.19    0.32
   9   4   2   21.56    0.89
   9   5   2  622.01    8.48
   9   6   2   31.31    0.74
   9   7   2   -0.20    0.33
   9   8   2  243.67    3.05
   9   9   2   27.06    0.84
   9  10   2   18.12    0.73
   9  11   2    0.20    0.49
   9  12   2  128.83    2.12
   9  13   2   33.45    1.06
   9  14   2   54.61    1.37
   9  15   2    6.35    0.71
   9  16   2    0.67    0.59
   9  17   2   32.16    1.05
   9   1   3  411.11    5.76
   9   2   3   57.81    1.49
   9   3   3    1.79    0.38
   9   4   3    1.08    0.38
   9   5   3  623.84    6.73
   9   6   3   23.05    0.65
   9   7   3   73.49    1.25
   9   8   3    1.02    0.45
   9   9   3   22.82    0.79
   9  10   3   38.19    1.01
   9  11   3   25.87    0.89
   9  12   3   24.82    0.92
   9  13   3    8.20    0.69
   9  14   3   22.34    0.94
   9  15   3  114.48    2.07
   9  16   3    4.83    0.67
   9  17   3   12.09    0.76
   9   0   4   22.99    1.06
   9   1   4  184.07    3.20
   9   2   4  474.25    6.75
   9   3   4   65.39    1.62
   9   4   4  668.64    7.18
   9   5   4    0.81    0.38
   9   6   4    2.06    0.40
   9   7   4  100.98    1.58
   9   8   4    0.72    0.49
   9   9   4    0.03    0.45
   9  10   4  108.78    1.83
   9  11   4  127.51    2.09
   9  12   4    2.81    0.59
   9  13   4    0.69    0.57
   9  14   4  127.33    2.21
   9  15   4    5.47    0.68
   9  16   4   33.68    1.09
   9  17   4    2.78    0.61
   9   1   5   38.88    1.26
   9   2   5  393.93    4.44
   9   3   5    1.10    0.54
   9   4   5   62.00    1.11
   9   5   5  262.83    3.21
   9   6   5    6.99    0.52
   9   7   5    1.49    0.49
   9   8   5   78.11    1.45
   9   9   5   68.20    1.37
   9  10   5  162.74    2.44
   9  11   5   47.64    1.22
   9  12   5    2.04    0.58
   9  13   5    1.28    0.59
   9  14   5   -0.67    0.57
   9  15   5   48.19    1.30
   9  16   5   19.65    0.89
   9   0   6   15.48    0.61
   9   1   6    0.59    0.41
   9   2   6   49.60    1.00
   9   3   6   23.44    0.74
   9   4   6   39.03    0.93
   9   5   6  179.05    2.43
   9   6   6   53.44    1.14
   9   7   6  170.62    2.43
   9   8   6    6.21    0.60
   9   9   6   14.37    0.75
   9  10   6   52.71    1.28
   9  11   6  167.96    2.59
   9  12   6   20.13    0.90
   9  13   6    9.52    0.76
   9  14   6   15.04    0.85
   9  15   6   27.63    1.02
   9  16   6    7.69    0.69
   9   1   7   31.75    0.87
   9   2   7  119.49    1.82
   9   3   7    0.59    0.52
   9   4   7   71.08    1.34
   9   5   7   11.56    0.66
   9   6   7   17.63    0.77
   9   7   7   96.12    1.69
   9   8   7   42.93    1.12
   9   9   7   97.16    1.79
   9  10   7   82.33    1.66
   9  11   7   83.30    1.70
   9  12   7   43.96    1.25
   9  13   7    3.70    0.67
   9  14   7    5.42    0.69
   9  15   7    4.29    0.65
   9   0   8  118.05    1.86
   9   1   8   40.57    1.03
   9   2   8    6.95    0.62
   9   3   8    1.86    0.57
   9   4   8    4.36    0.62
   9   5   8   81.58    1.54
   9   6   8  109.10    1.87
   9   7   8   18.20    0.83
   9   8   8    1.53    0.58
   9   9   8    0.31    0.58
   9  10   8   15.53    0.85
   9  11   8    5.46    0.71
   9  12   8    2.25    0.66
   9  13   8    5.59    0.71
   9  14   8    4.34    0.68
   9   1   9   96.25    1.74
   9   2   9   40.81    1.10
   9   3   9   16.00    0.83
   9   4   9    6.95    0.71
   9   5   9   24.18    0.94
   9   6   9   78.36    1.60
   9   7   9   77.98    1.61
   9   8   9   -0.20    0.59
   9   9   9   24.31    0.99
   9  10   9    8.73    0.77
   9  11   9   45.26    1.29
   9  12   9   36.49    1.17
   9  13   9    0.15    0.61
   9  14   9   13.33    0.82
   9   0  10  473.68    5.66
   9   1  10  114.18    2.01
   9   2  10   17.61    0.89
   9   3  10   52.52    1.30
   9   4  10   47.85    1.26
   9   5  10    7.08    0.74
   9   6  10   86.26    1.74
   9   7  10   25.97    1.02
   9   8  10  117.49    2.12
   9   9  10    3.90    0.70
   9  10  10   10.79    0.82
   9  11  10   60.18    1.47
   9  12  10   30.14    1.07
   9  13  10   -0.82    0.60
   9   1  11   10.71    0.85
   9   2  11   -0.37    0.69
   9   3  11   20.33    0.97
   9   4  11   15.09    0.87
   9   5  11   14.31    0.88
   9   6  11   21.90    1.00
   9   7  11    1.90    0.70
   9   8  11   14.62    0.90
   9   9  11    0.51    0.67
   9  10  11    0.84    0.65
   9  11  11    9.84    0.79
   9  12  11    0.42    0.62
   9   0  12   18.47    1.05
   9   1  12  103.75    2.04
   9   2  12    3.89    0.82
   9   3  12   32.92    1.20
   9   4  12    2.15    0.73
   9   5  12    3.02    0.73
   9   6  12    6.18    0.77
   9   7  12   80.24    1.74
   9   8  12   -0.19    0.68
   9   9  12   -0.41    0.67
   9  10  12   -2.34    0.63
   9   1  13   18.62    1.03
   9   2  13   42.93    1.35
   9   3  13    1.68    0.78
   9   4  13   14.02    1.04
   9   5  13    1.19    0.81
   9   6  13    1.38    1.43
   9   7  13   10.11    0.85
   9   8  13   29.99    1.12
   9   0  14   15.68    1.03
   9   1  14   29.84    1.21
   9   2  14    5.63    0.97
   9   3  14    2.81    0.94
   9   4  14    2.57    0.89
   9   5  14   19.11    1.12
   9   6  14    7.19    1.23
   9   1  15   31.16    2.41
   9   2  15   51.50    2.02
  10   0   0 1217.10   14.38
  10   2   0 1511.87   17.63
  10   4   0    1.76    0.45
  10   6   0  510.92    5.03
  10   8   0  283.68    3.09
  10  10   0  112.03    1.82
  10  12   0  409.57    5.00
  10  14   0   11.76    0.78
  10  16   0   65.62    1.51
  10   1   1  692.37    8.74
  10   2   1   77.82    1.62
  10   3   1  565.61    7.56
  10   4   1    0.59    0.34
  10   5   1    1.84    0.50
  10   6   1   92.71    1.25
  10   7   1  121.56    1.55
  10   8   1    2.05    0.37
  10   9   1   -1.21    0.42
  10  10   1   -0.29    0.45
  10  11   1   12.10    0.69
  10  12   1  133.74    2.18
  10  13   1    7.10    0.66
  10  14   1   40.47    1.19
  10  15   1   -1.23    0.56
  10  16   1   30.86    1.07
  10  17   1    5.89    0.66
  10   0   2  312.75    4.80
  10   1   2    7.42    0.53
  10   2   2  701.27    9.06
  10   3   2   19.93    0.85
  10   4   2  399.79    5.89
  10   5   2    1.40    0.32
  10   6   2  383.65    3.91
  10   7   2    4.82    0.38
  10   8   2    0.24    0.35
  10   9   2  102.54    1.69
  10  10   2  151.26    2.25
  10  11   2  242.51    3.26
  10  12   2   53.04    1.28
  10  13   2   80.92    1.65
  10  14   2   20.74    0.92
  10  15   2   -0.65    0.57
  10  16   2    0.39    0.59
  10  17   2    3.25    0.62
  10   1   3    1.87    0.46
  10   2   3  182.71    3.13
  10   3   3   26.55    1.03
  10   4   3    0.03    0.33
  10   5   3   -0.42    0.31
  10   6   3    1.76    0.33
  10   7   3    4.30    0.39
  10   8   3   26.97    0.75
  10   9   3   15.58    0.69
  10  10   3  156.58    2.33
  10  11   3    4.40    0.59
  10  12   3  439.51    5.33
  10  13   3   14.76    0.80
  10  14   3   11.99    0.79
  10  15   3    0.45    0.59
  10  16   3   92.68    1.81
  10  17   3    3.40    0.62
  10   0   4 1049.10   13.76
  10   1   4   45.34    1.30
  10   2   4    1.58    0.51
  10   3   4   21.98    0.95
  10   4   4  125.50    1.74
  10   5   4   22.48    0.59
  10   6   4   72.03    1.13
  10   7   4   11.55    0.54
  10   8   4   -0.46    0.40
  10   9   4   32.34    0.93
  10  10   4   54.60    1.24
  10  11   4  225.39    3.13
  10  12   4    3.57    0.60
  10  13   4  118.23    2.09
  10  14   4    0.32    0.59
  10  15   4   -0.48    0.57
  10  16   4    1.19    0.59
  10   1   5  457.74    5.09
  10   2   5  301.21    3.53
  10   3   5   32.18    0.78
  10   4   5    5.51    0.45
  10   5   5    2.24    0.41
  10   6   5    7.58    0.49
  10   7   5    1.88    0.43
  10   8   5   13.33    0.62
  10   9   5   16.19    0.75
  10  10   5   42.32    1.13
  10  11   5    7.70    0.67
  10  12   5  220.44    3.15
  10  13   5    5.25    0.67
  10  14   5    0.09    0.59
  10  15   5    5.97    0.69
  10  16   5   80.34    1.63
  10   0   6  339.01    3.97
  10   1   6    5.22    0.48
  10   2   6  201.47    2.60
  10   3   6    1.97    0.48
  10   4   6   29.33    0.82
  10   5   6   49.42    0.97
  10   6   6    5.93    0.50
  10   7   6    0.46    0.46
  10   8   6   28.34    0.82
  10   9   6   10.48    0.69
  10  10   6    0.62    0.56
  10  11   6   13.75    0.78
  10  12   6    3.71    0.64
  10  13   6    5.89    0.69
  10  14   6   18.22    0.90
  10  15   6    6.23    0.69
  10  16   6    8.78    0.71
  10   1   7  230.35    2.97
  10   2   7   39.27    0.99
  10   3   7   62.46    1.24
  10   4   7    0.31    0.48
  10   5   7    0.07    0.47
  10   6   7  219.36    2.65
  10   7   7    5.93    0.50
  10   8   7   10.72    0.63
  10   9   7    0.82    0.56
  10  10   7  319.91    4.16
  10  11   7   -0.87    0.57
  10  12   7   21.10    0.95
  10  13   7   -0.91    0.58
  10  14   7   16.36    0.87
  10  15   7    0.18    0.57
  10   0   8  237.13    3.11
  10   1   8    2.27    0.56
  10   2   8   81.99    1.52
  10   3   8    5.92    0.64
  10   4   8   26.99    0.91
  10   5   8   51.77    1.10
  10   6   8   16.54    0.73
  10   7   8    9.27    0.59
  10   8   8  112.82    1.77
  10   9   8  117.76    2.07
  10  10   8   12.02    0.80
  10  11   8   41.64    1.23
  10  12   8   79.45    1.70
  10  13   8   14.55    0.85
  10  14   8    9.58    0.76
  10   1   9    0.37    0.58
  10   2   9   -0.66    0.59
  10   3   9   12.09    0.78
  10   4   9   12.11    0.76
  10   5   9    4.10    0.58
  10   6   9   19.75    0.81
  10   7   9   -1.77    0.51
  10   8   9    9.84    0.68
  10   9   9    7.16    0.73
  10  10   9  207.16    3.07
  10  11   9    2.98    0.68
  10  12   9   16.91    0.90
  10  13   9    6.29    0.71
  10   0  10  153.61    2.44
  10   1  10   11.42    0.80
  10   2  10    2.83    0.65
  10   3  10    0.58    0.62
  10   4  10   15.09    0.85
  10   5  10   17.09    0.80
  10   6  10   30.78    0.97
  10   7  10    3.76    0.63
  10   8  10   39.68    1.10
  10   9  10   89.87    1.82
  10  10  10   37.52    1.20
  10  11  10   43.68    1.26
  10  12  10   25.95    1.01
  10  13  10   11.76    0.80
  10   1  11   89.20    1.81
  10   2  11    8.56    0.80
  10   3  11    3.29    0.73
  10   4  11   22.74    0.99
  10   5  11   -0.05    0.58
  10   6  11   -1.45    0.57
  10   7  11    2.54    0.64
  10   8  11    0.53    0.60
  10   9  11   21.47    0.99
  10  10  11   46.97    1.31
  10  11  11    2.75    0.67
  10   0  12  633.50    7.39
  10   1  12    5.32    0.82
  10   2  12    0.35    0.74
  10   3  12    8.47    0.83
  10   4  12  107.58    2.05
  10   5  12    2.22    0.63
  10   6  12   56.13    1.31
  10   7  12    0.32    0.62
  10   8  12   -0.70    0.61
  10   9  12   -0.35    0.66
  10  10  12   31.32    1.14
  10   1  13   81.24    1.79
  10   2  13   76.43    1.74
  10   3  13    0.34    0.76
  10   4  13    4.13    0.80
  10   5  13   -0.14    0.69
  10   6  13   14.75    0.93
  10   7  13    4.39    0.68
  10   8  13   -1.38    0.63
  10   0  14  132.06    2.33
  10   1  14    5.19    0.87
  10   2  14    3.43    0.95
  10   3  14    9.52    1.30
  10   4  14    6.67    0.92
  10   5  14    4.72    0.78
  10   6  14   52.25    1.44
  11   1   0  417.74    5.98
  11   3   0    5.22    0.51
  11   5   0  842.14   11.68
  11   7   0   17.23    0.60
  11   9   0   78.20    1.42
  11  11   0  317.43    4.02
  11  13   0    0.09    0.54
  11  15   0    9.14    0.75
  11  17   0   53.28    1.31
  11   1   1    7.66    0.55
  11   2   1    0.41    0.31
  11   3   1  234.36    3.80
  11   4   1  271.02    4.33
  11   5   1  166.91    2.14
  11   6   1  165.94    2.17
  11   7   1   14.17    0.57
  11   8   1    1.40    0.47
  11   9   1   29.48    0.87
  11  10   1   23.16    0.82
  11  11   1   18.27    0.79
  11  12   1   59.46    1.36
  11  13   1   -0.87    0.52
  11  14   1    6.67    0.70
  11  15   1   25.13    1.00
  11  16   1   59.88    1.43
  11  17   1    5.19    0.65
  11   0   2  903.00   12.59
  11   1   2  594.96    7.92
  11   2   2   39.99    1.17
  11   3   2   15.90    0.88
  11   4   2  376.51    5.68
  11   5   2  709.96    7.62
  11   6   2  161.27    2.13
  11   7   2    3.76    0.43
  11   8   2    4.78    0.56
  11   9   2    1.52    0.48
  11  10   2   12.67    0.68
  11  11   2  126.55    2.07
  11  12   2   27.22    0.96
  11  13   2    5.46    0.65
  11  14   2   42.47    1.22
  11  15   2    2.70    0.64
  11  16   2   74.81    1.60
  11  17   2    9.57    0.72
  11   1   3  194.01    3.31
  11   2   3  328.06    5.07
  11   3   3  313.52    4.94
  11   4   3   16.55    0.57
  11   5   3  426.15    4.80
  11   6   3  140.17    1.95
  11   7   3   -0.32    0.38
  11   8   3   19.48    0.73
  11   9   3   63.82    1.29
  11  10   3   27.20    0.89
  11  11   3   23.61    0.89
  11  12   3    8.15    0.68
  11  13   3    4.96    0.65
  11  14   3   10.49    0.77
  11  15   3   54.29    1.38
  11  16   3    0.02    0.57
  11   0   4   31.53    1.12
  11   1   4  143.65    2.76
  11   2   4   72.41    1.17
  11   3   4    9.62    0.49
  11   4   4   12.99    0.54
  11   5   4   62.37    1.13
  11   6   4  206.80    2.68
  11   7   4  118.22    1.83
  11   8   4   60.33    1.24
  11   9   4   70.66    1.39
  11  10   4   -0.07    0.49
  11  11   4   12.58    0.74
  11  12   4    6.81    0.67
  11  13   4    7.10    0.70
  11  14   4   12.24    0.80
  11  15   4   12.14    0.80
  11  16   4    5.79    0.67
  11   1   5   58.01    1.06
  11   2   5   -0.21    0.37
  11   3   5   55.38    1.04
  11   4   5   83.60    1.39
  11   5   5  208.05    2.70
  11   6   5  237.81    3.05
  11   7   5    2.06    0.51
  11   8   5    8.01    0.61
  11   9   5   37.39    1.04
  11  10   5  163.71    2.49
  11  11   5   46.04    1.21
  11  12   5   53.98    1.34
  11  13   5   11.32    0.78
  11  14   5   11.76    0.79
  11  15   5   40.56    1.19
  11  16   5   20.88    0.89
  11   0   6   10.33    0.58
  11   1   6    8.23    0.56
  11   2   6   -0.16    0.45
  11   3   6    4.98    0.52
  11   4   6   48.29    1.07
  11   5   6   86.62    1.50
  11   6   6   -0.35    0.49
  11   7   6  271.02    3.49
  11   8   6   72.29    1.46
  11   9   6   50.91    1.25
  11  10   6    0.30    0.56
  11  11   6    3.44    0.62
  11  12   6   24.87    0.99
  11  13   6   49.66    1.33
  11  14   6    1.69    0.62
  11  15   6   50.16    1.29
  11   1   7   49.31    1.09
  11   2   7    7.08    0.58
  11   3   7   -0.37    0.47
  11   4   7   48.29    1.12
  11   5   7   49.13    1.15
  11   6   7  144.03    2.20
  11   7   7   71.09    1.45
  11   8   7    4.27    0.64
  11   9   7   26.58    0.97
  11  10   7   60.90    1.43
  11  11   7  145.20    2.40
  11  12   7   34.29    1.14
  11  13   7    2.09    0.63
  11  14   7    3.30    0.65
  11  15   7   37.92    1.12
  11   0   8   21.81    0.84
  11   1   8   14.35    0.75
  11   2   8   18.22    0.81
  11   3   8   -0.69    0.52
  11   4   8    3.05    0.58
  11   5   8   55.01    1.28
  11   6   8   81.12    1.58
  11   7   8   18.30    0.86
  11   8   8  170.66    2.61
  11   9   8   41.41    1.19
  11  10   8   -0.81    0.60
  11  11   8   32.54    1.12
  11  12   8   34.45    1.15
  11  13   8   -0.29    0.60
  11  14   8   -0.94    0.57
  11   1   9   35.80    1.07
  11   2   9    0.77    0.62
  11   3   9   97.92    1.78
  11   4   9    1.59    0.61
  11   5   9   15.04    0.82
  11   6   9    7.01    0.71
  11   7   9   17.27    0.88
  11   8   9    1.99    0.64
  11   9   9   -0.64    0.60
  11  10   9   25.91    1.03
  11  11   9   54.50    1.40
  11  12   9    0.19    0.62
  11  13   9    7.23    0.73
  11   0  10  179.46    2.69
  11   1  10   84.39    1.67
  11   2  10    1.54    0.64
  11   3  10    4.65    0.69
  11   4  10  101.91    1.90
  11   5  10   60.98    1.45
  11   6  10   30.80    1.09
  11   7  10   29.70    1.09
  11   8  10   -0.40    0.63
  11   9  10   10.70    0.81
  11  10  10   -0.39    0.62
  11  11  10   12.52    0.83
  11  12  10    3.74    0.67
  11   1  11   12.85    0.88
  11   2  11  155.23    2.52
  11   3  11   45.51    1.28
  11   4  11   11.76    0.84
  11   5  11   19.14    0.96
  11   6  11    0.59    0.77
  11   7  11    6.38    0.77
  11   8  11    8.06    0.81
  11   9  11   -0.05    0.65
  11  10  11    5.47    0.73
  11  11  11   11.96    0.82
  11   0  12    5.75    0.82
  11   1  12  103.71    2.02
  11   2  12    0.74    0.73
  11   3  12    9.89    0.86
  11   4  12    0.11    0.78
  11   5  12   47.59    1.35
  11   6  12   -0.91    0.66
  11   7  12  100.03    1.96
  11   8  12   -0.55    0.67
  11   9  12   67.02    1.55
  11  10  12    5.86    0.79
  11   1  13    2.86    0.81
  11   2  13   14.45    0.97
  11   3  13    3.19    0.85
  11   4  13    0.21    0.80
  11   5  13   -0.93    0.78
  11   6  13    9.35    0.97
  11   7  13    4.56    0.88
  11   8  13   13.70    0.99
  11   0  14   32.12    1.23
  11   1  14   34.37    1.25
  11   2  14    8.20    1.00
  11   3  14    2.58    0.90
  11   4  14    6.42    0.92
  11   5  14    3.25    0.85
  12   0   0  830.17   10.58
  12   2   0  489.87    7.00
  12   4   0 1289.14   16.27
  12   6   0    5.63    0.42
  12   8   0   38.93    0.97
  12  10   0  232.22    3.11
  12  12   0   62.06    1.40
  12  14   0  170.68    2.67
  12  16   0   52.15    1.34
  12   1   1  111.04    2.17
  12   2   1  225.66    3.71
  12   3   1    1.17    0.56
  12   4   1   75.92    1.78
  12   5   1  517.56    5.70
  12   6   1   11.04    0.51
  12   7   1   43.35    0.94
  12   8   1   17.03    0.72
  12   9   1  119.33    1.88
  12  10   1   14.37    0.71
  12  11   1   11.51    0.70
  12  12   1    2.45    0.58
  12  13   1    9.15    0.72
  12  14   1   -0.32    0.57
  12  15   1   70.20    1.57
  12  16   1    1.75    0.61
  12  17   1   33.03    1.05
  12   0   2  100.02    2.07
  12   1   2    0.61    0.40
  12   2   2  218.67    3.68
  12   3   2   51.73    1.40
  12   4   2  225.41    2.74
  12   5   2  123.38    1.73
  12   6   2   50.58    0.99
  12   7   2   40.71    0.92
  12   8   2   94.79    1.59
  12   9   2   15.06    0.69
  12  10   2  105.20    1.80
  12  11   2   34.00    1.03
  12  12   2  113.18    1.99
  12  13   2   65.35    1.48
  12  14   2   35.78    1.14
  12  15   2   21.11    0.94
  12  16   2   -0.74    0.56
  12   1   3   95.09    2.04
  12   2   3   71.53    1.71
  12   3   3  141.33    1.89
  12   4   3  248.22    3.00
  12   5   3    1.91    0.37
  12   6   3  434.80    4.96
  12   7   3   55.27    1.16
  12   8   3   38.42    0.98
  12   9   3   15.21    0.71
  12  10   3    6.01    0.60
  12  11   3    5.30    0.62
  12  12   3   61.52    1.41
  12  13   3    1.14    0.58
  12  14   3   21.03    0.93
  12  15   3    0.84    0.60
  12  16   3   -0.25    0.56
  12   0   4  123.41    1.70
  12   1   4  198.36    2.47
  12   2   4    9.70    0.50
  12   3   4   12.48    0.53
  12   4   4    2.76    0.40
  12   5   4  445.41    5.07
  12   6   4  227.13    2.91
  12   7   4  154.23    2.21
  12   8   4    8.81    0.60
  12   9   4   13.00    0.69
  12  10   4   17.88    0.80
  12  11   4   79.08    1.59
  12  12   4    4.62    0.63
  12  13   4    6.60    0.70
  12  14   4   12.25    0.81
  12  15   4   68.82    1.54
  12  16   4   46.10    1.23
  12   1   5   43.44    0.91
  12   2   5   11.37    0.54
  12   3   5    4.07    0.47
  12   4   5   37.75    0.90
  12   5   5   40.65    0.97
  12   6   5  358.43    4.30
  12   7   5   68.61    1.34
  12   8   5    3.85    0.55
  12   9   5   14.02    0.73
  12  10   5   52.23    1.27
  12  11   5   20.77    0.88
  12  12   5  124.52    2.16
  12  13   5    7.50    0.72
  12  14   5   33.31    1.11
  12  15   5    1.76    0.61
  12  16   5   24.52    0.94
  12   0   6  206.10    2.68
  12   1   6   40.14    0.95
  12   2   6   13.92    0.64
  12   3   6    4.89    0.54
  12   4   6    0.42    0.47
  12   5   6    8.84    0.61
  12   6   6  202.34    2.77
  12   7   6    4.15    0.57
  12   8   6  202.17    2.85
  12   9   6   21.60    0.89
  12  10   6   -0.08    0.55
  12  11   6    6.29    0.68
  12  12   6   50.64    1.33
  12  13   6   15.69    0.86
  12  14   6   38.23    1.17
  12  15   6   11.18    0.75
  12   1   7   41.51    1.01
  12   2   7    2.17    0.52
  12   3   7   17.72    0.75
  12   4   7   69.79    1.38
  12   5   7  122.69    1.97
  12   6   7    5.68    0.61
  12   7   7   20.97    0.85
  12   8   7    5.84    0.66
  12   9   7   10.54    0.75
  12  10   7    3.32    0.64
  12  11   7    1.55    0.64
  12  12   7   63.44    1.50
  12  13   7   -0.00    0.59
  12  14   7    0.80    0.59
  12  15   7    6.20    0.68
  12   0   8   18.61    0.81
  12   1   8    4.98    0.61
  12   2   8   48.51    1.17
  12   3   8    0.94    0.54
  12   4   8  142.09    2.22
  12   5   8   51.87    1.25
  12   6   8    0.50    0.58
  12   7   8  121.63    2.06
  12   8   8    1.53    0.61
  12   9   8   32.26    1.09
  12  10   8   11.22    0.81
  12  11   8   72.28    1.61
  12  12   8    0.98    0.63
  12  13   8    6.04    0.71
  12  14   8   12.92    0.80
  12   1   9    1.41    0.61
  12   2   9  124.18    2.06
  12   3   9   16.55    0.83
  12   4   9  118.92    2.03
  12   5   9   56.02    1.35
  12   6   9    2.00    0.63
  12   7   9   15.38    0.85
  12   8   9   45.21    1.27
  12   9   9   66.73    1.54
  12  10   9   58.51    1.45
  12  11   9   10.09    0.80
  12  12   9   20.64    0.94
  12  13   9   18.20    0.88
  12   0  10   56.66    1.37
  12   1  10   17.80    0.89
  12   2  10   28.69    1.04
  12   3  10    5.25    0.71
  12   4  10   26.75    1.03
  12   5  10    1.17    0.64
  12   6  10  113.75    2.07
  12   7  10   53.79    1.39
  12   8  10    8.10    0.77
  12   9  10    4.52    0.72
  12  10  10   11.45    0.82
  12  11  10   17.59    0.90
  12  12  10    0.29    0.60
  12   1  11   77.14    1.66
  12   2  11   44.57    1.27
  12   3  11   46.94    1.31
  12   4  11   13.90    0.88
  12   5  11   10.94    0.85
  12   6  11   -0.76    0.66
  12   7  11    0.15    0.66
  12   8  11   32.12    1.14
  12   9  11   13.33    0.87
  12  10  11   49.39    1.32
  12  11  11   -0.45    0.60
  12   0  12   69.05    1.63
  12   1  12   10.62    0.87
  12   2  12    3.24    0.76
  12   3  12   28.46    1.10
  12   4  12    0.01    0.67
  12   5  12    1.42    0.71
  12   6  12  174.86    2.76
  12   7  12   25.79    1.08
  12   8  12    1.56    0.70
  12   9  12   -1.20    0.65
  12   1  13   16.96    1.01
  12   2  13   17.99    1.04
  12   3  13   33.51    1.21
  12   4  13   11.90    1.02
  12   5  13    4.44    0.89
  12   6  13   -0.91    0.78
  12   7  13   -2.08    0.78
  12   0  14  189.97    2.90
  12   1  14    8.59    0.89
  12   2  14    1.51    0.88
  12   3  14   16.40    1.08
  12   4  14   22.62    1.21
  12   5  14    3.44    1.00
  13   1   0  727.14    9.81
  13   3   0  175.79    3.24
  13   5   0  267.79    3.21
  13   7   0   10.28    0.54
  13   9   0   -0.57    0.44
  13  11   0  611.61    7.02
  13  13   0  232.01    3.29
  13  15   0    8.79    0.74
  13   1   1  509.17    7.20
  13   2   1  401.19    5.96
  13   3   1    2.30    0.50
  13   4   1   -1.10    0.33
  13   5   1   49.60    0.96
  13   6   1    2.09    0.39
  13   7   1    1.81    0.43
  13   8   1   86.82    1.50
  13   9   1    2.43    0.50
  13  10   1   36.25    1.02
  13  11   1    9.23    0.69
  13  12   1  147.11    2.36
  13  13   1    6.57    0.68
  13  14   1   13.37    0.82
  13  15   1   11.17    0.78
  13  16   1   30.90    1.05
  13   0   2  119.30    2.39
  13   1   2   71.66    1.71
  13   2   2  262.09    4.26
  13   3   2    1.86    0.39
  13   4   2   46.44    0.92
  13   5   2   52.43    1.00
  13   6   2   13.24    0.57
  13   7   2  111.25    1.75
  13   8   2   26.57    0.84
  13   9   2   14.75    0.70
  13  10   2   18.56    0.79
  13  11   2  373.22    4.64
  13  12   2   33.45    1.06
  13  13   2    5.60    0.67
  13  14   2   26.00    1.01
  13  15   2   25.99    1.01
  13  16   2    7.69    0.70
  13   1   3  577.55    6.27
  13   2   3    3.82    0.41
  13   3   3  194.94    2.46
  13   4   3   10.39    0.49
  13   5   3    1.28    0.38
  13   6   3   31.82    0.82
  13   7   3  134.23    2.01
  13   8   3    8.00    0.58
  13   9   3    8.35    0.62
  13  10   3   39.07    1.07
  13  11   3   36.94    1.08
  13  12   3   17.03    0.83
  13  13   3    4.77    0.66
  13  14   3   16.51    0.87
  13  15   3    2.12    0.62
  13  16   3   19.93    0.89
  13   0   4  201.37    2.53
  13   1   4   25.72    0.69
  13   2   4  261.01    3.15
  13   3   4   17.40    0.60
  13   4   4    0.23    0.39
  13   5   4  122.70    1.82
  13   6   4   31.39    0.89
  13   7   4   34.37    0.94
  13   8   4  194.50    2.70
  13   9   4   66.83    1.38
  13  10   4   23.21    0.89
  13  11   4    3.32    0.59
  13  12   4  147.82    2.40
  13  13   4   34.57    1.12
  13  14   4   13.25    0.82
  13  15   4    9.01    0.75
  13  16   4   -0.69    0.54
  13   1   5   24.02    0.72
  13   2   5    4.75    0.49
  13   3   5  148.95    2.09
  13   4   5   65.16    1.23
  13   5   5   30.99    0.88
  13   6   5    4.93    0.56
  13   7   5  130.40    2.03
  13   8   5    0.71    0.52
  13   9   5    3.30    0.58
  13  10   5   72.91    1.53
  13  11   5  130.38    2.19
  13  12   5   36.24    1.13
  13  13   5   18.00    0.89
  13  14   5    2.50    0.63
  13  15   5   41.41    1.19
  13   0   6   37.49    0.95
  13   1   6   70.59    1.30
  13   2   6   51.43    1.11
  13   3   6    6.76    0.56
  13   4   6   16.37    0.70
  13   5   6  195.63    2.69
  13   6   6   59.57    1.27
  13   7   6    9.65    0.68
  13   8   6   44.86    1.17
  13   9   6  288.35    3.80
  13  10   6   18.03    0.86
  13  11   6  258.31    3.56
  13  12   6   40.43    1.20
  13  13   6   22.37    0.96
  13  14   6   -1.32    0.56
  13  15   6    0.18    0.56
  13   1   7   27.69    0.87
  13   2   7   70.32    1.37
  13   3   7   36.78    1.01
  13   4   7   32.30    0.96
  13   5   7    2.06    0.54
  13   6   7    3.20    0.58
  13   7   7   15.56    0.81
  13   8   7   11.45    0.75
  13   9   7   36.87    1.13
  13  10   7   54.62    1.37
  13  11   7   14.23    0.84
  13  12   7   61.55    1.48
  13  13   7   66.11    1.52
  13  14   7    5.11    0.66
  13   0   8  352.51    4.34
  13   1   8   32.50    0.97
  13   2   8    0.57    0.55
  13   3   8    2.94    0.61
  13   4   8   23.33    0.90
  13   5   8   42.78    1.15
  13   6   8   62.24    1.40
  13   7   8    0.63    0.58
  13   8   8    0.12    0.58
  13   9   8   -1.24    0.57
  13  10   8    4.90    0.70
  13  11   8   53.90    1.39
  13  12   8    0.66    0.62
  13  13   8   34.03    1.11
  13  14   8   24.69    0.97
  13   1   9  348.64    4.39
  13   2   9   91.81    1.73
  13   3   9    0.11    0.59
  13   4   9   -0.48    0.57
  13   5   9   48.90    1.27
  13   6   9    3.61    0.67
  13   7   9    4.90    0.69
  13   8   9    8.68    0.77
  13   9   9    0.65    0.63
  13  10   9    4.95    0.71
  13  11   9   54.34    1.40
  13  12   9    9.35    0.77
  13  13   9    9.66    0.77
  13   0  10  154.07    2.46
  13   1  10   16.68    0.88
  13   2  10   11.20    0.81
  13   3  10   13.01    0.84
  13   4  10   -0.45    0.61
  13   5  10  111.08    2.03
  13   6  10   28.27    1.07
  13   7  10   15.15    0.89
  13   8  10   -0.62    0.62
  13   9  10   39.77    1.23
  13  10  10    0.28    0.62
  13  11  10   -0.50    0.60
  13  12  10   -0.81    0.60
  13   1  11   94.63    1.87
  13   2  11   -0.11    0.65
  13   3  11    3.88    0.72
  13   4  11   27.13    1.07
  13   5  11    9.09    0.82
  13   6  11    0.63    0.67
  13   7  11   29.62    1.12
  13   8  11   -1.75    0.62
  13   9  11    7.25    0.76
  13  10  11   51.34    1.34
  13  11  11   17.65    0.89
  13   0  12   43.40    1.30
  13   1  12   12.19    0.87
  13   2  12    2.04    0.71
  13   3  12   11.36    0.86
  13   4  12    2.89    0.73
  13   5  12   57.04    1.47
  13   6  12    5.35    0.77
  13   7  12   36.33    1.20
  13   8  12    3.10    0.86
  13   9  12   41.87    1.25
  13   1  13   28.22    1.15
  13   2  13    0.81    0.74
  13   3  13   -0.47    0.69
  13   4  13   42.75    1.30
  13   5  13    9.35    0.97
  13   6  13   -1.47    0.76
  13   7  13    3.46    0.97
  13   0  14    4.05    0.81
  13   1  14   89.97    1.84
  13   2  14    1.45    0.85
  13   3  14   24.53    1.24
  13   4  14    1.20    0.97
  14   0   0 1244.33   15.55
  14   2   0    5.04    0.61
  14   4   0  484.61    5.38
  14   6   0    9.09    0.51
  14   8   0   -0.83    0.45
  14  10   0   53.16    1.24
  14  12   0   -0.04    0.53
  14  14   0   18.42    0.90
  14  16   0    5.93    0.67
  14   1   1  648.32    8.95
  14   2   1   13.56    0.53
  14   3   1   31.30    0.74
  14   4   1   25.22    0.67
  14   5   1  138.77    1.93
  14   6   1   86.63    1.42
  14   7   1    0.33    0.49
  14   8   1   -1.19    0.44
  14   9   1   99.54    1.71
  14  10   1   42.98    1.12
  14  11   1    8.88    0.68
  14  12   1    8.44    0.69
  14  13   1   -0.10    0.57
  14  14   1   -0.52    0.57
  14  15   1   17.30    0.88
  14  16   1    4.11    0.63
  14   0   2  584.76    6.34
  14   1   2  288.88    3.38
  14   2   2   -0.07    0.34
  14   3   2   76.87    1.25
  14   4   2  285.51    3.40
  14   5   2  237.75    2.96
  14   6   2    4.72    0.46
  14   7   2   93.24    1.57
  14   8   2    6.44    0.55
  14   9   2   32.22    0.95
  14  10   2   38.64    1.07
  14  11   2  116.41    2.01
  14  12   2   -0.48    0.53
  14  13   2   89.18    1.78
  14  14   2    7.20    0.72
  14  15   2   29.47    1.05
  14  16   2    0.53    0.56
  14   1   3   21.24    0.74
  14   2   3   41.71    0.87
  14   3   3   27.08    0.70
  14   4   3   78.61    1.31
  14   5   3  160.44    2.19
  14   6   3  320.04    3.88
  14   7   3   45.91    1.07
  14   8   3   -0.37    0.45
  14   9   3   77.33    1.50
  14  10   3  157.32    2.41
  14  11   3  124.20    2.10
  14  12   3   19.07    0.87
  14  13   3    2.02    0.62
  14  14   3    2.01    0.63
  14  15   3   73.95    1.60
  14  16   3   12.34    0.77
  14   0   4    0.56    0.36
  14   1   4   29.69    0.75
  14   2   4   43.32    0.92
  14   3   4    7.43    0.50
  14   4   4   10.89    0.56
  14   5   4   39.88    0.98
  14   6   4  133.66    2.00
  14   7   4    2.39    0.50
  14   8   4   32.34    0.95
  14   9   4  276.50    3.61
  14  10   4   14.69    0.77
  14  11   4  327.69    4.23
  14  12   4   -0.28    0.55
  14  13   4   -0.66    0.56
  14  14   4   -1.09    0.56
  14  15   4    8.56    0.73
  14  16   4   18.15    0.85
  14   1   5   69.72    1.26
  14   2   5   95.06    1.53
  14   3   5  325.47    3.91
  14   4   5    8.60    0.59
  14   5   5   32.64    0.91
  14   6   5  149.43    2.22
  14   7   5   48.16    1.14
  14   8   5    2.00    0.54
  14   9   5   25.64    0.93
  14  10   5   56.84    1.35
  14  11   5    0.83    0.56
  14  12   5    1.68    0.61
  14  13   5    8.81    0.75
  14  14   5    0.56    0.59
  14  15   5   -0.72    0.54
  14   0   6  168.77    2.35
  14   1   6  179.67    2.46
  14   2   6   31.67    0.89
  14   3   6    0.59    0.47
  14   4   6   61.90    1.27
  14   5   6  212.06    2.88
  14   6   6  130.94    2.07
  14   7   6   21.25    0.84
  14   8   6    6.37    0.66
  14   9   6    1.57    0.58
  14  10   6    1.96    0.60
  14  11   6   36.75    1.15
  14  12   6    1.67    0.62
  14  13   6    4.44    0.67
  14  14   6   -0.41    0.56
  14  15   6    3.83    0.63
  14   1   7  133.83    2.07
  14   2   7  124.46    1.98
  14   3   7  128.19    2.02
  14   4   7   10.60    0.67
  14   5   7   54.97    1.26
  14   6   7    8.86    0.68
  14   7   7    3.50    0.62
  14   8   7   16.40    0.83
  14   9   7   26.51    0.99
  14  10   7   -1.34    0.57
  14  11   7   -1.46    0.57
  14  12   7   75.32    1.64
  14  13   7   -0.16    0.59
  14  14   7    0.18    0.57
  14   0   8   94.88    1.71
  14   1   8  129.04    2.08
  14   2   8   -0.69    0.55
  14   3   8    0.40    0.57
  14   4   8   60.29    1.36
  14   5   8  144.82    2.30
  14   6   8    3.64    0.63
  14   7   8   92.04    1.77
  14   8   8    3.84    0.66
  14   9   8  121.32    2.15
  14  10   8   -0.22    0.61
  14  11   8    8.21    0.77
  14  12   8    0.99    0.62
  14  13   8   39.95    1.18
  14   1   9   49.20    1.25
  14   2   9   28.71    1.00
  14   3   9   23.98    0.94
  14   4   9    8.19    0.73
  14   5   9    3.64    0.67
  14   6   9    7.83    0.74
  14   7   9   38.21    1.18
  14   8   9   29.89    1.08
  14   9   9    0.24    0.62
  14  10   9    8.63    0.77
  14  11   9   -0.97    0.60
  14  12   9   92.24    1.80
  14   0  10    7.11    0.75
  14   1  10   -0.85    0.62
  14   2  10   16.73    0.89
  14   3  10   22.11    0.96
  14   4  10   14.41    0.86
  14   5  10    1.07    0.64
  14   6  10   55.42    1.42
  14   7  10  183.14    2.83
  14   8  10   23.57    1.01
  14   9  10   18.89    0.94
  14  10  10    0.69    0.63
  14  11  10    1.37    0.63
  14   1  11   72.65    1.63
  14   2  11    0.79    0.67
  14   3  11   22.66    1.02
  14   4  11    1.71    0.69
  14   5  11   27.86    1.09
  14   6  11    2.14    0.70
  14   7  11   -1.00    0.63
  14   8  11   16.87    0.92
  14   9  11    6.35    0.74
  14  10  11    2.13    0.66
  14   0  12    3.22    0.73
  14   1  12   15.87    0.93
  14   2  12   20.51    0.99
  14   3  12    8.79    0.83
  14   4  12    3.13    0.73
  14   5  12    0.44    0.69
  14   6  12   87.61    1.82
  14   7  12    4.95    0.90
  14   8  12   13.21    0.85
  14   9  12    9.46    0.85
  14   1  13   23.99    1.05
  14   2  13    5.86    0.80
  14   3  13   74.23    1.67
  14   4  13   17.30    0.96
  14   5  13   -0.44    0.79
  14   6  13   -0.14    0.83
  14   0  14    9.89    0.90
  14   1  14    2.36    0.81
  14   2  14    3.92    0.96
  14   3  14    7.72    1.07
  15   1   0   56.47    1.02
  15   3   0   53.27    0.99
  15   5   0   90.54    1.45
  15   7   0  404.87    4.77
  15   9   0    6.69    0.60
  15  11   0  143.99    2.31
  15  13   0    1.62    0.60
  15  15   0  129.26    2.22
  15   1   1   46.64    0.91
  15   2   1  155.37    2.06
  15   3   1   26.11    0.69
  15   4   1   84.89    1.36
  15   5   1    0.45    0.38
  15   6   1  425.15    4.93
  15   7   1   76.32    1.39
  15   8   1   92.51    1.61
  15   9   1   -1.30    0.46
  15  10   1   79.52    1.56
  15  11   1   43.03    1.17
  15  12   1   19.18    0.87
  15  13   1   -0.54    0.56
  15  14   1   29.14    1.05
  15  15   1    6.09    0.70
  15  16   1    0.33    0.56
  15   0   2  219.10    2.71
  15   1   2   74.51    1.22
  15   2   2   41.44    0.86
  15   3   2   20.30    0.63
  15   4   2  336.76    3.95
  15   5   2   42.23    0.94
  15   6   2   61.18    1.22
  15   7   2   35.03    0.94
  15   8   2   95.52    1.66
  15   9   2  125.42    2.03
  15  10   2   29.80    0.98
  15  11   2   19.15    0.85
  15  12   2   37.36    1.13
  15  13   2   26.52    1.01
  15  14   2   49.96    1.32
  15  15   2   38.81    1.17
  15  16   2   58.68    1.37
  15   1   3    1.95    0.37
  15   2   3    4.13    0.41
  15   3   3   19.11    0.63
  15   4   3   27.63    0.76
  15   5   3  155.59    2.20
  15   6   3   57.39    1.17
  15   7   3   25.18    0.82
  15   8   3    5.19    0.56
  15   9   3   70.97    1.44
  15  10   3   48.02    1.22
  15  11   3   12.86    0.76
  15  12   3   37.16    1.14
  15  13   3   26.71    1.01
  15  14   3   15.60    0.85
  15  15   3    1.98    0.61
  15  16   3   27.97    0.98
  15   0   4  187.36    2.45
  15   1   4   46.97    0.98
  15   2   4   93.12    1.49
  15   3   4   10.75    0.56
  15   4   4  301.87    3.69
  15   5   4  107.95    1.73
  15   6   4    7.81    0.59
  15   7   4   19.39    0.77
  15   8   4  160.45    2.40
  15   9   4   29.19    0.96
  15  10   4   38.81    1.12
  15  11   4    1.24    0.57
  15  12   4  100.57    1.91
  15  13   4    8.39    0.74
  15  14   4   25.14    0.99
  15  15   4    1.48    0.59
  15   1   5    4.05    0.50
  15   2   5   35.05    0.92
  15   3   5   18.40    0.73
  15   4   5  239.54    3.10
  15   5   5  117.44    1.87
  15   6   5  134.54    2.08
  15   7   5    1.91    0.54
  15   8   5   16.37    0.78
  15   9   5  100.47    1.83
  15  10   5    0.09    0.54
  15  11   5    0.55    0.57
  15  12   5   17.90    0.89
  15  13   5   53.99    1.37
  15  14   5    3.25    0.64
  15  15   5    3.17    0.61
  15   0   6  210.98    2.81
  15   1   6    5.93    0.56
  15   2   6   98.30    1.65
  15   3   6    6.44    0.60
  15   4   6  146.15    2.20
  15   5   6    4.37    0.57
  15   6   6  143.97    2.23
  15   7   6   28.00    0.96
  15   8   6    1.00    0.55
  15   9   6   34.21    1.08
  15  10   6   26.45    0.99
  15  11   6   -0.02    0.58
  15  12   6   24.57    1.00
  15  13   6    7.87    0.73
  15  14   6    4.10    0.64
  15   1   7  114.99    1.89
  15   2   7   38.53    1.18
  15   3   7  162.21    2.39
  15   4   7   93.12    1.68
  15   5   7   34.43    1.02
  15   6   7  137.31    2.21
  15   7   7  103.03    1.87
  15   8   7   48.07    1.26
  15   9   7   -0.77    0.57
  15  10   7   -0.68    0.59
  15  11   7   51.92    1.36
  15  12   7    0.19    0.61
  15  13   7    6.53    0.70
  15  14   7   10.85    0.75
  15   0   8  105.82    1.85
  15   1   8   34.04    1.04
  15   2   8   36.56    1.06
  15   3   8   39.37    1.11
  15   4   8    4.04    0.64
  15   5   8   38.16    1.12
  15   6   8  389.84    4.85
  15   7   8   98.34    1.86
  15   8   8   29.15    1.05
  15   9   8   -0.92    0.60
  15  10   8   10.16    0.80
  15  11   8   15.25    0.87
  15  12   8   -0.02    0.60
  15  13   8    6.42    0.70
  15   1   9    9.83    0.74
  15   2   9    0.53    0.59
  15   3   9   62.58    1.44
  15   4   9   16.60    0.87
  15   5   9   19.94    0.92
  15   6   9    5.29    0.70
  15   7   9    5.71    0.73
  15   8   9   19.54    0.93
  15   9   9   -0.80    0.60
  15  10   9   -0.94    0.60
  15  11   9   -1.01    0.59
  15  12   9   14.05    0.83
  15   0  10   40.51    1.21
  15   1  10    1.29    0.63
  15   2  10    0.06    0.62
  15   3  10    0.56    0.63
  15   4  10   14.16    0.86
  15   5  10   12.73    0.85
  15   6  10  196.68    2.97
  15   7  10    0.89    0.65
  15   8  10    5.12    0.73
  15   9  10    7.69    0.76
  15  10  10    5.71    0.71
  15  11  10    3.32    0.66
  15   1  11   -0.46    0.65
  15   2  11   25.94    1.06
  15   3  11   22.95    1.02
  15   4  11  128.48    2.26
  15   5  11    9.87    0.82
  15   6  11    4.07    0.73
  15   7  11    0.81    0.67
  15   8  11   -1.10    0.64
  15   9  11   -0.04    0.62
  15  10  11   11.71    0.84
  15   0  12   46.29    1.34
  15   1  12   45.37    1.33
  15   2  12    1.69    0.71
  15   3  12   16.14    0.94
  15   4  12   -0.47    0.68
  15   5  12   84.62    1.78
  15   6  12    7.29    0.80
  15   7  12   19.46    0.97
  15   8  12   -0.25    0.66
  15   1  13    7.94    0.83
  15   2  13   -0.16    0.70
  15   3  13   23.45    1.04
  15   4  13   65.52    1.55
  15   5  13    8.20    0.95
  15   6  13    6.41    1.28
  15   0  14    0.69    0.84
  15   1  14    2.08    0.86
  16   0   0   58.99    1.06
  16   2   0   70.64    1.19
  16   4   0   29.73    0.78
  16   6   0   78.90    1.43
  16   8   0  124.66    1.98
  16  10   0    0.06    0.52
  16  12   0   32.76    1.07
  16  14   0   28.54    1.04
  16  16   0   84.60    1.66
  16   1   1  349.36    4.03
  16   2   1  221.15    2.75
  16   3   1   38.52    0.86
  16   4   1   21.08    0.67
  16   5   1    6.39    0.51
  16   6   1    2.60    0.51
  16   7   1   96.10    1.63
  16   8   1   20.24    0.78
  16   9   1   20.59    0.82
  16  10   1   30.68    0.99
  16  11   1  126.22    2.14
  16  12   1   -0.46    0.55
  16  13   1   13.89    0.82
  16  14   1   -0.09    0.58
  16  15   1   38.06    1.15
  16  16   1    2.48    0.60
  16   0   2  183.52    2.37
  16   1   2   -0.33    0.33
  16   2   2   18.41    0.61
  16   3   2    8.07    0.49
  16   4   2   25.64    0.74
  16   5   2   20.03    0.76
  16   6   2   31.99    0.89
  16   7   2  114.39    1.84
  16   8   2  159.77    2.36
  16   9   2  142.58    2.23
  16  10   2    5.15    0.62
  16  11   2  429.25    5.26
  16  12   2   51.19    1.32
  16  13   2    9.92    0.76
  16  14   2   -1.38    0.55
  16  15   2    8.09    0.72
  16  16   2   10.41    0.73
  16   1   3   47.15    0.97
  16   2   3  333.21    3.94
  16   3   3   73.39    1.28
  16   4   3   89.73    1.51
  16   5   3    0.14    0.47
  16   6   3   26.73    0.84
  16   7   3   18.77    0.76
  16   8   3   73.84    1.46
  16   9   3    3.82    0.58
  16  10   3   16.43    0.81
  16  11   3    7.45    0.68
  16  12   3    3.91    0.65
  16  13   3   31.56    1.09
  16  14   3   10.20    0.77
  16  15   3    5.17    0.66
  16   0   4    4.05    0.46
  16   1   4  248.41    3.11
  16   2   4    1.31    0.44
  16   3   4   18.99    0.74
  16   4   4   34.91    0.92
  16   5   4  153.74    2.24
  16   6   4    4.81    0.54
  16   7   4   48.50    1.15
  16   8   4   -0.15    0.49
  16   9   4    0.16    0.53
  16  10   4   14.91    0.79
  16  11   4  346.46    4.45
  16  12   4   -0.51    0.57
  16  13   4   64.17    1.50
  16  14   4   46.73    1.28
  16  15   4    1.55    0.59
  16   1   5  402.12    4.73
  16   2   5  137.60    2.04
  16   3   5    1.34    0.49
  16   4   5    2.30    0.51
  16   5   5   88.18    1.58
  16   6   5    7.89    0.63
  16   7   5   -0.02    0.51
  16   8   5   64.49    1.41
  16   9   5    5.09    0.63
  16  10   5    1.06    0.56
  16  11   5   40.57    1.19
  16  12   5    1.10    0.60
  16  13   5    0.65    0.60
  16  14   5   19.45    0.90
  16  15   5   32.30    1.04
  16   0   6  120.14    1.90
  16   1   6   93.30    1.62
  16   2   6   19.87    0.79
  16   3   6   13.08    0.70
  16   4   6   -0.70    0.49
  16   5   6  163.53    2.43
  16   6   6   44.30    1.15
  16   7   6  113.39    1.96
  16   8   6  118.19    2.04
  16   9   6    6.58    0.68
  16  10   6    6.50    0.69
  16  11   6   89.49    1.79
  16  12   6   49.98    1.33
  16  13   6   11.43    0.78
  16  14   6   61.83    1.42
  16   1   7  263.00    3.43
  16   2   7   84.84    1.58
  16   3   7    1.07    0.55
  16   4   7   99.11    1.77
  16   5   7   21.18    0.89
  16   6   7   89.02    1.70
  16   7   7    0.39    0.58
  16   8   7   35.63    1.11
  16   9   7    1.65    0.63
  16  10   7    4.73    0.69
  16  11   7   -0.61    0.59
  16  12   7    7.66    0.73
  16  13   7    5.04    0.66
  16   0   8   13.03    0.77
  16   1   8   55.01    1.30
  16   2   8   20.05    0.88
  16   3   8   16.60    0.84
  16   4   8   14.23    0.79
  16   5   8  152.73    2.41
  16   6   8    6.08    0.68
  16   7   8   74.91    1.61
  16   8   8    8.45    0.76
  16   9   8   45.00    1.28
  16  10   8    0.43    0.63
  16  11   8    1.42    0.63
  16  12   8    1.90    0.64
  16  13   8   85.69    1.69
  16   1   9    1.09    0.61
  16   2   9   10.21    0.76
  16   3   9    0.61    0.62
  16   4   9  141.77    2.34
  16   5   9   21.53    0.95
  16   6   9   26.09    1.02
  16   7   9    1.40    0.64
  16   8   9    1.72    0.65
  16   9   9   -0.00    0.62
  16  10   9   22.39    0.98
  16  11   9   38.78    1.18
  16  12   9   16.78    0.87
  16   0  10   12.63    0.82
  16   1  10  151.09    2.46
  16   2  10    1.32    0.65
  16   3  10   29.66    1.08
  16   4  10    7.71    0.77
  16   5  10  158.87    2.57
  16   6  10    2.34    0.68
  16   7  10    0.33    0.64
  16   8  10   -0.03    0.63
  16   9  10  102.34    1.94
  16  10  10    3.54    0.67
  16  11  10   28.40    1.03
  16   1  11   21.64    1.00
  16   2  11    3.82    0.74
  16   3  11   54.18    1.42
  16   4  11   37.49    1.20
  16   5  11    8.11    0.79
  16   6  11    4.85    0.74
  16   7  11   17.06    0.93
  16   8  11   -0.66    0.62
  16   9  11    0.36    0.63
  16   0  12    0.27    0.69
  16   1  12   14.13    0.91
  16   2  12    0.98    0.70
  16   3  12   13.12    0.89
  16   4  12   33.05    1.17
  16   5  12   -1.13    0.66
  16   6  12    5.17    0.76
  16   7  12    0.20    0.65
  16   8  12   -0.69    0.69
  16   1  13   37.79    1.22
  16   2  13   10.66    0.86
  16   3  13    9.35    0.84
  16   4  13   -0.70    0.69
  16   5  13   12.85    0.97
  17   1   0   -0.35    0.34
  17   3   0    5.01    0.45
  17   5   0   20.83    0.77
  17   7   0   -0.79    0.44
  17   9   0  529.68    6.18
  17  11   0  377.43    4.74
  17  13   0    6.54    0.70
  17  15   0   26.75    0.99
  17   1   1   82.81    1.35
  17   2   1  183.42    2.41
  17   3   1   81.85    1.37
  17   4   1    3.33    0.47
  17   5   1   24.49    0.82
  17   6   1  352.40    4.26
  17   7   1   28.55    0.88
  17   8   1    0.40    0.50
  17   9   1   43.57    1.14
  17  10   1  238.36    3.29
  17  11   1    4.95    0.64
  17  12   1    6.12    0.56
  17  13   1    6.76    0.71
  17  14   1   22.23    0.95
  17  15   1    3.68    0.64
  17   0   2  148.57    2.05
  17   1   2   36.26    0.85
  17   2   2   -0.16    0.37
  17   3   2    2.35    0.42
  17   4   2   41.50    1.01
  17   5   2   12.52    0.62
  17   6   2   -0.06    0.45
  17   7   2    1.77    0.50
  17   8   2   14.98    0.74
  17   9   2   86.93    1.66
  17  10   2    0.35    0.54
  17  11   2   69.91    1.52
  17  12   2    9.70    0.61
  17  13   2    5.13    0.68
  17  14   2    6.85    0.82
  17  15   2   27.14    0.99
  17   1   3  730.49    7.95
  17   2   3   10.90    0.56
  17   3   3   40.66    1.00
  17   4   3   13.44    0.66
  17   5   3   13.04    0.66
  17   6   3   -0.82    0.44
  17   7   3    1.00    0.50
  17   8   3   -0.01    0.49
  17   9   3   72.86    1.51
  17  10   3    0.01    0.53
  17  11   3    2.16    0.59
  17  12   3   14.06    0.67
  17  13   3    6.25    0.70
  17  14   3    0.62    0.59
  17  15   3    0.93    0.57
  17   0   4 1025.66   10.96
  17   1   4    1.37    0.49
  17   2   4   12.72    0.66
  17   3   4   11.92    0.63
  17   4   4  548.45    6.24
  17   5   4   16.12    0.71
  17   6   4   34.66    0.97
  17   7   4   15.67    0.75
  17   8   4   54.50    1.28
  17   9   4   24.39    0.92
  17  10   4   25.64    0.96
  17  11   4   47.05    1.27
  17  12   4    5.49    0.61
  17  13   4   38.50    1.17
  17  14   4    0.78    0.59
  17  15   4    1.27    0.58
  17   1   5  353.01    4.27
  17   2   5   13.11    0.67
  17   3   5   25.65    0.84
  17   4   5    0.73    0.49
  17   5   5    6.55    0.60
  17   6   5    0.34    0.51
  17   7   5   52.00    1.25
  17   8   5   16.27    0.80
  17   9   5   21.35    0.90
  17  10   5    1.59    0.59
  17  11   5    4.77    0.67
  17  12   5   53.37    1.22
  17  13   5    1.37    0.61
  17  14   5    0.53    0.57
  17   0   6  247.43    3.25
  17   1   6   30.07    0.92
  17   2   6   35.59    0.99
  17   3   6   52.74    1.21
  17   4   6  105.80    1.82
  17   5   6    6.82    0.63
  17   6   6  122.48    2.05
  17   7   6   75.82    1.56
  17   8   6   -0.64    0.54
  17   9   6   65.85    1.49
  17  10   6   27.29    1.02
  17  11   6  128.83    2.23
  17  12   6   16.11    0.77
  17  13   6  142.45    2.34
  17  14   6    1.49    0.58
  17   1   7   31.15    0.97
  17   2   7   16.39    0.78
  17   3   7   72.54    1.48
  17   4   7    1.78    0.60
  17   5   7   42.06    1.16
  17   6   7   29.66    1.01
  17   7   7   35.66    1.11
  17   8   7   11.98    0.79
  17   9   7    9.33    0.77
  17  10   7   15.21    0.86
  17  11   7   14.26    0.85
  17  12   7   16.19    0.77
  17  13   7    1.88    0.60
  17   0   8   24.90    0.95
  17   1   8    2.39    0.62
  17   2   8   40.26    1.14
  17   3   8   11.34    0.76
  17   4   8    3.74    0.63
  17   5   8   -0.20    0.57
  17   6   8  162.86    2.56
  17   7   8    0.96    0.62
  17   8   8    2.82    0.67
  17   9   8   73.61    1.63
  17  10   8   32.89    1.12
  17  11   8   55.54    1.40
  17  12   8   41.18    1.07
  17   1   9   80.07    1.66
  17   2   9   73.99    1.59
  17   3   9  221.44    3.18
  17   4   9   10.59    0.79
  17   5   9    0.23    0.62
  17   6   9   61.75    1.48
  17   7   9   61.37    1.48
  17   8   9   -0.53    0.61
  17   9   9   -0.01    0.62
  17  10   9   47.52    1.30
  17  11   9    0.38    0.61
  17   0  10   55.60    1.41
  17   1  10    2.25    0.67
  17   2  10   18.55    0.93
  17   3  10   32.12    1.13
  17   4  10   24.68    1.02
  17   5  10    8.07    0.78
  17   6  10   93.58    1.86
  17   7  10    8.10    0.78
  17   8  10    2.73    0.67
  17   9  10   -0.41    0.60
  17  10  10   38.45    1.16
  17   1  11    9.99    0.82
  17   2  11    4.45    0.72
  17   3  11   80.40    1.72
  17   4  11   12.33    0.86
  17   5  11    5.27    0.74
  17   6  11    2.62    0.70
  17   7  11    3.34    0.71
  17   8  11   -0.47    0.61
  17   9  11    0.15    0.65
  17   0  12    0.15    0.69
  17   1  12    0.26    0.69
  17   2  12    0.00    0.69
  17   3  12    2.37    0.74
  17   4  12    1.57    0.71
  17   5  12    7.40    0.79
  17   6  12    3.48    0.70
  17   7  12   15.24    0.91
  17   1  13    1.54    0.72
  17   2  13   -1.84    0.66
  17   3  13    2.33    0.75
  17   4  13   -0.63    0.79
  18   0   0    9.80    0.52
  18   2   0   36.62    0.88
  18   4   0   62.07    1.24
  18   6   0  108.93    1.78
  18   8   0  387.39    4.73
  18  10   0    1.42    0.56
  18  12   0  156.33    2.52
  18  14   0   -0.58    0.57
  18   1   1   42.37    0.94
  18   2   1   16.23    0.63
  18   3   1   43.49    1.03
  18   4   1   34.24    0.93
  18   5   1    9.73    0.61
  18   6   1  252.24    3.28
  18   7   1    3.66    0.54
  18   8   1   17.55    0.78
  18   9   1   49.80    1.24
  18  10   1   65.57    1.45
  18  11   1   70.24    1.54
  18  12   1   -0.92    0.56
  18  13   1   61.72    1.47
  18  14   1   33.62    1.11
  18  15   1   15.82    0.83
  18   0   2  227.18    2.89
  18   1   2   13.96    0.60
  18   2   2   39.04    0.97
  18   3   2    7.19    0.59
  18   4   2  234.92    3.04
  18   5   2   32.97    0.92
  18   6   2    2.81    0.51
  18   7   2   85.60    1.58
  18   8   2   11.77    0.70
  18   9   2   89.49    1.70
  18  10   2    1.32    0.56
  18  11   2   -1.16    0.53
  18  12   2    4.57    0.66
  18  13   2    2.59    0.63
  18  14   2   -0.29    0.58
  18  15   2   17.80    0.85
  18   1   3   19.92    0.75
  18   2   3  136.05    2.03
  18   3   3   13.22    0.63
  18   4   3   55.15    1.18
  18   5   3    8.67    0.60
  18   6   3  234.01    3.12
  18   7   3   54.25    1.24
  18   8   3  161.49    2.46
  18   9   3    0.05    0.53
  18  10   3   25.00    0.95
  18  11   3   59.79    1.43
  18  12   3    6.19    0.69
  18  13   3    8.01    0.73
  18  14   3   26.64    1.00
  18  15   3   13.87    0.79
  18   0   4   11.91    0.63
  18   1   4   12.71    0.65
  18   2   4    8.90    0.61
  18   3   4   27.19    0.85
  18   4   4    0.58    0.48
  18   5   4   29.75    0.91
  18   6   4  112.19    1.88
  18   7   4  215.16    3.00
  18   8   4   15.53    0.78
  18   9   4   64.93    1.45
  18  10   4   -0.91    0.53
  18  11   4   22.63    0.95
  18  12   4    0.13    0.59
  18  13   4   19.25    0.91
  18  14   4   36.16    1.12
  18   1   5   13.30    0.68
  18   2   5  178.54    2.53
  18   3   5   40.20    1.04
  18   4   5    8.12    0.63
  18   5   5   11.71    0.70
  18   6   5   14.09    0.76
  18   7   5   20.90    0.86
  18   8   5  147.99    2.36
  18   9   5   20.46    0.89
  18  10   5    0.04    0.57
  18  11   5    0.01    0.58
  18  12   5    0.00    0.58
  18  13   5   -0.67    0.57
  18  14   5   11.54    0.76
  18   0   6  124.26    2.00
  18   1   6  105.57    1.80
  18   2   6    1.36    0.54
  18   3   6    2.84    0.57
  18   4   6  309.93    3.96
  18   5   6   96.44    1.76
  18   6   6  148.06    2.34
  18   7   6   64.65    1.45
  18   8   6   -0.49    0.55
  18   9   6   33.42    1.11
  18  10   6    1.85    0.62
  18  11   6   48.17    1.31
  18  12   6    4.74    0.67
  18  13   6    0.90    0.58
  18   1   7   11.95    0.73
  18   2   7   22.09    0.89
  18   3   7   42.87    1.16
  18   4   7  156.09    2.43
  18   5   7   16.23    0.83
  18   6   7    2.03    0.61
  18   7   7    2.88    0.63
  18   8   7   13.44    0.83
  18   9   7   21.34    0.95
  18  10   7   46.13    1.29
  18  11   7    3.27    0.66
  18  12   7   12.10    0.79
  18  13   7    4.74    0.65
  18   0   8   10.88    0.74
  18   1   8  165.34    2.54
  18   2   8   13.88    0.79
  18   3   8   45.03    1.22
  18   4   8    9.59    0.74
  18   5   8  126.76    2.17
  18   6   8   22.28    0.96
  18   7   8   -0.95    0.60
  18   8   8   31.43    1.10
  18   9   8    3.72    0.68
  18  10   8    2.71    0.66
  18  11   8   51.64    1.34
  18  12   8   13.25    0.80
  18   1   9    0.47    0.61
  18   2   9    9.97    0.78
  18   3   9   10.67    0.80
  18   4   9  189.06    2.86
  18   5   9    6.14    0.74
  18   6   9  135.70    2.31
  18   7   9    0.76    0.63
  18   8   9   -1.89    0.58
  18   9   9    0.59    0.63
  18  10   9   -0.06    0.61
  18  11   9    3.51    0.67
  18   0  10   -1.45    0.61
  18   1  10   50.65    1.36
  18   2  10   16.88    0.91
  18   3  10   13.03    0.86
  18   4  10   -0.95    0.62
  18   5  10   44.22    1.29
  18   6  10   39.61    1.23
  18   7  10    1.68    0.67
  18   8  10    2.86    0.67
  18   9  10    0.66    0.62
  18  10  10    2.98    0.66
  18   1  11   -0.13    0.64
  18   2  11   30.81    1.12
  18   3  11   15.86    0.91
  18   4  11   20.94    0.98
  18   5  11    6.21    0.76
  18   6  11   53.04    1.40
  18   7  11   31.79    1.10
  18   8  11    3.05    0.68
  18   0  12   24.65    1.06
  18   1  12    6.88    0.81
  18   2  12    0.08    0.68
  18   3  12    0.11    0.68
  18   4  12   -0.99    0.63
  18   5  12   19.62    0.94
  18   6  12   89.45    1.78
  18   1  13   -2.58    0.69
  18   2  13   -1.04    0.75
  18   3  13   22.59    1.11
  19   1   0   22.50    0.79
  19   3   0   32.41    0.89
  19   5   0   16.84    0.71
  19   7   0  152.60    2.32
  19   9   0   65.95    1.44
  19  11   0  325.92    4.25
  19  13   0    0.85    0.60
  19  15   0   -0.53    0.54
  19   1   1   87.77    1.51
  19   2   1  185.45    2.53
  19   3   1    0.14    0.43
  19   4   1  128.36    1.97
  19   5   1    0.71    0.47
  19   6   1   52.81    1.19
  19   7   1   -0.48    0.48
  19   8   1   87.71    1.66
  19   9   1   -1.09    0.51
  19  10   1    2.74    0.59
  19  11   1    0.88    0.58
  19  12   1   26.40    1.01
  19  13   1    0.97    0.60
  19  14   1   16.91    0.86
  19  15   1    2.07    0.59
  19   0   2  225.28    2.94
  19   1   2   27.16    0.85
  19   2   2   -0.77    0.42
  19   3   2   19.29    0.74
  19   4   2   31.03    0.89
  19   5   2   28.74    0.88
  19   6   2  225.61    3.05
  19   7   2   95.15    1.71
  19   8   2  263.26    3.52
  19   9   2   18.22    0.84
  19  10   2    4.08    0.62
  19  11   2  129.14    2.22
  19  12   2   66.04    1.52
  19  13   2    2.02    0.62
  19  14   2   30.66    1.05
  19  15   2   -0.06    0.56
  19   1   3  334.48    4.07
  19   2   3  222.57    2.94
  19   3   3   14.14    0.67
  19   4   3    9.82    0.62
  19   5   3    4.09    0.54
  19   6   3  158.12    2.37
  19   7   3    5.43    0.61
  19   8   3   46.81    1.20
  19   9   3    0.04    0.48
  19  10   3   93.44    1.80
  19  11   3   10.37    0.76
  19  12   3   25.96    1.01
  19  13   3   11.50    0.78
  19  14   3    5.51    0.67
  19   0   4   11.97    0.66
  19   1   4   25.14    0.83
  19   2   4    0.13    0.47
  19   3   4    0.28    0.47
  19   4   4   48.11    1.13
  19   5   4   30.98    0.95
  19   6   4  221.45    3.05
  19   7   4   16.58    0.80
  19   8   4   14.68    0.78
  19   9   4    4.25    0.56
  19  10   4    3.42    0.63
  19  11   4    2.07    0.62
  19  12   4    1.34    0.61
  19  13   4   31.26    1.07
  19  14   4   37.17    1.11
  19   1   5  132.14    2.07
  19   2   5  136.86    2.12
  19   3   5   50.63    1.19
  19   4   5  152.67    2.33
  19   5   5    1.35    0.55
  19   6   5   29.28    0.98
  19   7   5   13.07    0.76
  19   8   5    1.28    0.57
  19   9   5    1.94    0.53
  19  10   5    3.43    0.64
  19  11   5   20.75    0.94
  19  12   5   -0.03    0.58
  19  13   5    5.53    0.67
  19  14   5    4.53    0.64
  19   0   6  267.16    3.51
  19   1   6   19.58    0.82
  19   2   6    0.60    0.52
  19   3   6   12.86    0.73
  19   4   6   74.28    1.52
  19   5   6   13.36    0.76
  19   6   6   62.25    1.41
  19   7   6    3.03    0.62
  19   8   6   10.90    0.77
  19   9   6   29.22    0.95
  19  10   6   47.54    1.30
  19  11   6   83.04    1.72
  19  12   6    0.80    0.60
  19  13   6   31.04    1.04
  19   1   7    0.24    0.57
  19   2   7   80.89    1.61
  19   3   7   80.16    1.61
  19   4   7  102.41    1.87
  19   5   7   22.81    0.94
  19   6   7   35.24    1.11
  19   7   7   10.10    0.76
  19   8   7   17.09    0.88
  19   9   7   14.06    0.84
  19  10   7   11.88    0.81
  19  11   7   18.18    0.90
  19  12   7    0.39    0.58
  19   0   8  229.96    3.23
  19   1   8    1.58    0.60
  19   2   8    8.08    0.72
  19   3   8   26.31    0.99
  19   4   8  195.38    2.90
  19   5   8   -0.37    0.59
  19   6   8   -1.46    0.59
  19   7   8   21.69    0.97
  19   8   8    1.45    0.64
  19   9   8    9.60    0.78
  19  10   8   65.63    1.52
  19  11   8   45.25    1.25
  19  12   8    8.18    0.72
  19   1   9   33.85    1.13
  19   2   9   12.93    0.84
  19   3   9   50.09    1.34
  19   4   9   -0.52    0.61
  19   5   9   24.09    1.00
  19   6   9   10.04    0.79
  19   7   9    2.83    0.68
  19   8   9    6.08    0.73
  19   9   9   28.51    1.06
  19  10   9    0.22    0.61
  19  11   9    7.61    0.72
  19   0  10    2.76    0.69
  19   1  10    8.26    0.78
  19   2  10   15.03    0.89
  19   3  10    6.11    0.75
  19   4  10   10.00    0.82
  19   5  10   22.24    0.99
  19   6  10    4.36    0.71
  19   7  10   19.93    0.94
  19   8  10   56.88    1.41
  19   9  10    0.76    0.61
  19   1  11   13.39    0.87
  19   2  11    2.57    0.70
  19   3  11    2.78    0.70
  19   4  11   64.34    1.53
  19   5  11    8.13    0.79
  19   6  11  111.13    2.04
  19   7  11    4.05    0.78
  19   8  11    3.68    0.71
  19   0  12   -0.20    0.65
  19   1  12   25.17    1.04
  19   2  12   12.26    0.85
  19   3  12   -1.00    0.63
  19   4  12   22.61    0.99
  19   5  12   17.37    0.92
  19   6  12    1.71    0.73
  19   1  13   -1.55    0.80
  20   0   0  834.95    9.09
  20   2   0   54.43    1.16
  20   4   0  469.68    5.48
  20   6   0  121.40    1.98
  20   8   0   88.14    1.68
  20  10   0    4.45    0.64
  20  12   0    9.31    0.76
  20  14   0   52.94    1.33
  20   1   1  631.00    7.05
  20   2   1   22.36    0.79
  20   3   1    3.45    0.51
  20   4   1   23.76    0.81
  20   5   1   -0.18    0.47
  20   6   1   19.82    0.80
  20   7   1   12.94    0.73
  20   8   1   13.32    0.75
  20   9   1   32.01    1.04
  20  10   1    5.83    0.66
  20  11   1   23.79    0.97
  20  12   1   -0.62    0.57
  20  13   1   12.18    0.80
  20  14   1    1.37    0.59
  20   0   2   98.90    1.66
  20   1   2   19.08    0.74
  20   2   2   27.69    0.85
  20   3   2    0.09    0.45
  20   4   2   25.17    0.84
  20   5   2   54.62    1.22
  20   6   2   68.52    1.41
  20   7   2    4.24    0.60
  20   8   2   12.49    0.74
  20   9   2  238.43    3.32
  20  10   2    0.14    0.56
  20  11   2  164.21    2.60
  20  12   2   24.72    0.99
  20  13   2   40.99    1.20
  20  14   2   38.45    1.14
  20   1   3   53.33    1.16
  20   2   3   49.73    1.13
  20   3   3   70.10    1.38
  20   4   3   97.01    1.69
  20   5   3    1.42    0.52
  20   6   3   42.06    1.11
  20   7   3   86.78    1.67
  20   8   3   33.23    1.05
  20   9   3    0.77    0.56
  20  10   3   49.36    1.30
  20  11   3   22.84    0.96
  20  12   3    1.35    0.61
  20  13   3    1.57    0.62
  20  14   3   22.05    0.91
  20   0   4   17.34    0.74
  20   1   4   12.68    0.67
  20   2   4    6.92    0.59
  20   3   4   -0.01    0.48
  20   4   4    0.49    0.50
  20   5   4   26.40    0.81
  20   6   4   31.16    1.00
  20   7   4   27.94    0.97
  20   8   4   37.38    1.11
  20   9   4  196.12    2.91
  20  10   4    6.75    0.70
  20  11   4  100.34    1.92
  20  12   4   36.82    1.15
  20  13   4   55.47    1.37
  20  14   4    0.83    0.57
  20   1   5  233.90    3.16
  20   2   5   58.41    1.30
  20   3   5   89.28    1.66
  20   4   5   71.72    1.48
  20   5   5    3.74    0.61
  20   6   5  102.16    1.86
  20   7   5   36.16    1.10
  20   8   5   18.25    0.86
  20   9   5    0.66    0.58
  20  10   5  135.35    2.30
  20  11   5    0.39    0.59
  20  12   5    5.79    0.69
  20  13   5    2.86    0.61
  20   0   6   34.97    1.04
  20   1   6   74.52    1.51
  20   2   6   -0.37    0.53
  20   3   6   50.53    1.25
  20   4   6    9.71    0.71
  20   5   6   28.83    1.00
  20   6   6    6.76    0.68
  20   7   6   -0.04    0.57
  20   8   6   -0.82    0.58
  20   9   6   46.24    1.28
  20  10   6   21.04    0.94
  20  11   6    2.70    0.64
  20  12   6    0.03    0.57
  20  13   6    5.38    0.65
  20   1   7  220.78    3.11
  20   2   7  132.93    2.20
  20   3   7   48.53    1.26
  20   4   7   24.71    0.97
  20   5   7   -0.51    0.56
  20   6   7    7.06    0.71
  20   7   7    0.72    0.61
  20   8   7    9.35    0.77
  20   9   7    0.38    0.61
  20  10   7    8.50    0.75
  20  11   7    1.76    0.62
  20  12   7    1.18    0.59
  20   0   8  123.79    2.14
  20   1   8   52.79    1.33
  20   2   8    1.52    0.61
  20   3   8   43.67    1.24
  20   4   8   81.63    1.70
  20   5   8   16.14    0.88
  20   6   8    6.11    0.72
  20   7   8    4.75    0.71
  20   8   8   31.29    1.10
  20   9   8    2.40    0.65
  20  10   8   -0.36    0.60
  20  11   8  134.51    2.23
  20   1   9    3.96    0.70
  20   2   9   31.28    1.10
  20   3   9    0.07    0.62
  20   4   9   -0.26    0.61
  20   5   9    3.69    0.69
  20   6   9    2.91    0.68
  20   7   9   20.57    0.96
  20   8   9   -0.14    0.61
  20   9   9    0.50    0.62
  20  10   9   25.54    0.99
  20   0  10   68.66    1.59
  20   1  10    1.48    0.67
  20   2  10    1.43    0.67
  20   3  10   -0.17    0.64
  20   4  10   12.75    0.85
  20   5  10    5.87    0.74
  20   6  10   16.11    0.88
  20   7  10    2.61    0.66
  20   8  10    2.15    0.64
  20   9  10   20.00    0.92
  20   1  11   18.70    0.95
  20   2  11    4.77    0.74
  20   3  11   83.91    1.76
  20   4  11    0.46    0.67
  20   5  11   -1.50    0.62
  20   6  11    1.31    0.65
  20   7  11   67.91    1.53
  20   0  12    8.06    0.78
  20   1  12   -1.18    0.62
  20   2  12    1.83    0.68
  20   3  12    4.22    0.72
  20   4  12    0.98    0.69
  20   5  12   20.71    0.99
  21   1   0  134.32    2.36
  21   3   0   11.95    0.76
  21   5   0  276.53    4.14
  21   7   0  150.17    2.71
  21   9   0  190.30    3.27
  21  11   0    5.86    0.80
  21  13   0   49.90    1.51
  21   1   1   10.81    0.89
  21   2   1  157.10    2.65
  21   3   1   82.78    1.75
  21   4   1   -1.03    0.53
  21   5   1    2.56    0.62
  21   6   1   32.88    1.15
  21   7   1   45.06    1.36
  21   8   1  261.44    4.09
  21   9   1   22.26    1.06
  21  10   1   -0.58    0.64
  21  11   1   -1.31    0.63
  21  12   1   35.94    1.32
  21  13   1   11.44    0.90
  21  14   1   26.77    1.13
  21   0   2   58.56    1.24
  21   1   2   32.57    1.07
  21   2   2    7.86    0.69
  21   3   2   21.81    0.93
  21   4   2  203.02    3.26
  21   5   2   58.46    1.49
  21   6   2   96.20    2.02
  21   7   2  153.98    2.77
  21   8   2   -0.11    0.61
  21   9   2   18.35    0.99
  21  10   2    3.12    0.73
  21  11   2   10.53    0.89
  21  12   2    3.14    0.74
  21  13   2   58.15    1.62
  21  14   2   -0.36    0.63
  21   1   3  110.29    2.11
  21   2   3    0.75    0.56
  21   3   3  112.67    2.16
  21   4   3   27.46    1.05
  21   5   3    4.47    0.68
  21   6   3   14.29    0.88
  21   7   3   23.30    1.05
  21   8   3   39.62    1.32
  21   9   3   16.06    0.96
  21  10   3   20.37    1.06
  21  11   3   38.43    1.36
  21  12   3    2.02    0.72
  21  13   3   16.39    0.97
  21  14   3   30.80    1.18
  21   0   4   44.96    1.12
  21   1   4   60.48    1.50
  21   2   4    6.50    0.69
  21   3   4   15.94    0.87
  21   4   4    6.40    0.72
  21   5   4    9.41    0.79
  21   6   4  144.64    2.66
  21   7   4   10.65    0.83
  21   8   4   81.70    1.92
  21   9   4   10.37    0.87
  21  10   4   40.95    1.39
  21  11   4   60.39    1.67
  21  12   4   15.94    0.99
  21  13   4   -0.69    0.62
  21   1   5   33.02    1.15
  21   2   5   38.24    1.24
  21   3   5   35.45    1.21
  21   4   5   86.81    1.93
  21   5   5   15.45    0.91
  21   6   5  213.04    3.52
  21   7   5    2.15    0.68
  21   8   5    2.94    0.72
  21   9   5    3.13    0.73
  21  10   5    6.63    0.82
  21  11   5   66.15    1.75
  21  12   5    0.91    0.68
  21  13   5    1.95    0.68
  21   0   6    6.99    0.66
  21   1   6   73.96    1.76
  21   2   6    3.01    0.68
  21   3   6   91.15    2.00
  21   4   6    0.14    0.63
  21   5   6   11.30    0.86
  21   6   6    5.56    0.77
  21   7   6   34.03    1.28
  21   8   6   -0.19    0.66
  21   9   6   14.19    0.96
  21  10   6   27.58    1.19
  21  11   6   36.46    1.31
  21  12   6   -0.81    0.62
  21   1   7   64.62    1.69
  21   2   7    5.84    0.79
  21   3   7   16.88    0.98
  21   4   7   18.62    1.02
  21   5   7    0.00    0.65
  21   6   7  125.06    2.52
  21   7   7    5.09    0.79
  21   8   7   49.04    1.52
  21   9   7   27.07    1.19
  21  10   7   -0.52    0.67
  21  11   7    8.29    0.82
  21   0   8    2.09    0.63
  21   1   8   12.27    0.93
  21   2   8    0.17    0.69
  21   3   8   -1.16    0.68
  21   4   8   32.01    1.27
  21   5   8   10.64    0.92
  21   6   8   19.05    1.07
  21   7   8   20.53    1.09
  21   8   8    2.60    0.75
  21   9   8   26.69    1.18
  21  10   8   10.51    0.87
  21  11   8    3.73    0.74
  21   1   9   37.64    1.18
  21   2   9   16.41    1.02
  21   3   9   20.47    1.09
  21   4   9   16.34    1.03
  21   5   9   18.46    1.07
  21   6   9    6.32    0.85
  21   7   9   46.28    1.49
  21   8   9   33.06    1.28
  21   9   9   66.80    1.74
  21   0  10   39.03    1.23
  21   1  10   40.81    1.25
  21   2  10    8.10    0.90
  21   3  10   12.60    0.97
  21   4  10  169.39    3.08
  21   5  10    2.96    0.77
  21   6  10   14.46    0.98
  21   7  10   16.06    1.00
  21   8  10   21.35    1.08
  21   1  11    2.09    0.69
  21   2  11   -1.33    0.72
  21   3  11   12.41    0.98
  21   4  11   51.08    1.55
  21   5  11   17.19    1.04
  21   6  11   13.87    0.96
  21   0  12    0.46    0.66
  21   1  12   38.31    1.19
  21   2  12    3.22    0.82
  21   3  12    7.23    0.90
  22   0   0   43.31    1.24
  22   2   0   13.95    0.81
  22   4   0   30.65    1.10
  22   6   0  516.98    7.02
  22   8   0   12.15    0.87
  22  10   0   12.38    0.92
  22  12   0    7.15    0.82
  22  14   0   69.72    1.72
  22   1   1  256.25    3.86
  22   2   1   81.26    1.76
  22   3   1  191.53    3.13
  22   4   1   57.40    1.48
  22   5   1    1.07    0.61
  22   6   1    1.99    0.64
  22   7   1  182.79    3.14
  22   8   1   11.99    0.86
  22   9   1    3.07    0.71
  22  10   1    9.08    0.86
  22  11   1    2.81    0.74
  22  12   1    6.81    0.81
  22  13   1    4.23    0.74
  22  14   1    0.04    0.65
  22   0   2  224.13    3.50
  22   1   2    0.27    0.56
  22   2   2   11.79    0.78
  22   3   2   23.99    0.99
  22   4   2   19.55    0.93
  22   5   2   19.52    0.96
  22   6   2  253.59    3.96
  22   7   2    1.90    0.65
  22   8   2   22.97    1.07
  22   9   2    0.58    0.66
  22  10   2   28.19    1.19
  22  11   2   11.96    0.92
  22  12   2    0.43    0.68
  22  13   2    4.93    0.75
  22   1   3    2.09    0.61
  22   2   3   65.15    1.58
  22   3   3   11.61    0.80
  22   4   3  236.97    3.73
  22   5   3   21.05    0.99
  22   6   3   88.69    1.96
  22   7   3    0.88    0.64
  22   8   3   31.52    1.22
  22   9   3   33.05    1.26
  22  10   3    7.03    0.82
  22  11   3   10.90    0.90
  22  12   3   18.50    1.03
  22  13   3   10.17    0.84
  22   0   4  150.10    2.66
  22   1   4   96.00    1.99
  22   2   4    3.81    0.67
  22   3   4  196.94    3.26
  22   4   4   83.84    1.88
  22   5   4   22.77    1.03
  22   6   4   -0.22    0.61
  22   7   4   76.84    1.85
  22   8   4   13.82    0.93
  22   9   4   97.41    2.17
  22  10   4   28.05    1.20
  22  11   4   58.87    1.65
  22  12   4   15.87    0.97
  22  13   4   16.75    0.95
  22   1   5   -0.37    0.61
  22   2   5   -0.61    0.60
  22   3   5   57.11    1.54
  22   4   5   70.01    1.72
  22   5   5    1.21    0.64
  22   6   5   26.90    1.13
  22   7   5    4.22    0.74
  22   8   5   15.05    0.97
  22   9   5   21.70    1.09
  22  10   5   18.63    1.04
  22  11   5    5.47    0.79
  22  12   5    9.84    0.84
  22   0   6   -0.55    0.61
  22   1   6    0.49    0.64
  22   2   6    2.25    0.67
  22   3   6   12.64    0.88
  22   4   6   22.55    1.06
  22   5   6   -1.08    0.62
  22   6   6   77.73    1.89
  22   7   6   14.62    0.97
  22   8   6   95.43    2.14
  22   9   6   12.65    0.93
  22  10   6    3.45    0.74
  22  11   6    1.66    0.69
  22  12   6   37.45    1.28
  22   1   7   27.57    1.15
  22   2   7    0.57    0.66
  22   3   7   -0.38    0.64
  22   4   7   17.21    1.00
  22   5   7    0.82    0.69
  22   6   7  105.67    2.27
  22   7   7   13.41    0.95
  22   8   7    0.12    0.69
  22   9   7   22.52    1.11
  22  10   7   81.14    1.93
  22  11   7    1.11    0.66
  22   0   8    6.67    0.84
  22   1   8   17.90    1.04
  22   2   8    1.79    0.75
  22   3   8   11.51    0.94
  22   4   8   26.49    1.19
  22   5   8   -0.60    0.70
  22   6   8   41.39    1.42
  22   7   8   -0.31    0.69
  22   8   8    0.05    0.70
  22   9   8    0.92    0.69
  22  10   8    1.52    0.69
  22   1   9   50.28    1.55
  22   2   9   32.55    1.29
  22   3   9   59.90    1.47
  22   4   9   55.39    1.63
  22   5   9    6.31    0.85
  22   6   9   98.63    2.19
  22   7   9   39.06    1.37
  22   8   9    5.50    0.81
  22   9   9    3.56    0.76
  22   0  10   78.43    1.96
  22   1  10   -0.23    0.71
  22   2  10   -1.13    0.69
  22   3  10    1.08    0.64
  22   4  10    8.83    0.89
  22   5  10   19.87    1.07
  22   6  10    1.00    0.71
  22   7  10    4.71    0.78
  22   1  11   -1.01    0.71
  22   2  11    2.29    0.77
  22   3  11   14.24    0.87
  22   4  11    4.17    0.80
  22   5  11    1.54    0.74
  22   0  12   91.59    2.07
  22   1  12    5.03    0.86
  23   1   0   51.56    1.39
  23   3   0    0.79    0.59
  23   5   0   27.88    1.10
  23   7   0  116.19    2.34
  23   9   0  102.67    2.22
  23  11   0   36.59    1.33
  23  13   0  157.17    2.84
  23   1   1  219.36    3.47
  23   2   1    0.90    0.59
  23   3   1    3.65    0.65
  23   4   1  263.21    4.04
  23   5   1   27.80    1.10
  23   6   1    0.75    0.63
  23   7   1   29.61    1.16
  23   8   1   86.98    2.00
  23   9   1    9.14    0.85
  23  10   1   13.36    0.94
  23  11   1   33.55    1.28
  23  12   1   -0.39    0.66
  23  13   1    5.33    0.75
  23   0   2    5.86    0.69
  23   1   2  219.78    3.49
  23   2   2   16.72    0.89
  23   3   2   62.94    1.58
  23   4   2   -0.88    0.59
  23   5   2  148.81    2.71
  23   6   2   24.30    1.07
  23   7   2    9.71    0.82
  23   8   2    9.85    0.85
  23   9   2  149.86    2.82
  23  10   2   14.01    0.96
  23  11   2   13.66    0.95
  23  12   2    1.75    0.70
  23  13   2    8.54    0.81
  23   1   3  343.04    4.97
  23   2   3   76.38    1.76
  23   3   3   42.51    1.31
  23   4   3   39.08    1.27
  23   5   3    6.83    0.76
  23   6   3    4.43    0.71
  23   7   3    2.86    0.70
  23   8   3   31.42    1.23
  23   9   3    2.11    0.72
  23  10   3    8.32    0.85
  23  11   3   19.88    1.06
  23  12   3    4.38    0.75
  23  13   3   -0.18    0.64
  23   0   4   13.59    0.86
  23   1   4   59.95    1.56
  23   2   4   19.12    0.96
  23   3   4   15.62    0.91
  23   4   4   13.67    0.88
  23   5   4   44.89    1.39
  23   6   4   35.99    1.27
  23   7   4   -1.44    0.61
  23   8   4   17.05    1.00
  23   9   4   -0.73    0.66
  23  10   4   13.43    0.94
  23  11   4   61.67    1.68
  23  12   4    2.60    0.70
  23   1   5   62.40    1.62
  23   2   5  100.17    2.13
  23   3   5   26.48    1.10
  23   4   5   17.63    0.96
  23   5   5   -0.38    0.62
  23   6   5    2.49    0.70
  23   7   5    4.30    0.75
  23   8   5   -1.06    0.64
  23   9   5    2.20    0.72
  23  10   5   20.67    1.07
  23  11   5    9.35    0.85
  23  12   5    6.28    0.76
  23   0   6   31.73    1.20
  23   1   6   22.17    1.05
  23   2   6    1.79    0.68
  23   3   6   29.05    1.18
  23   4   6    0.63    0.67
  23   5   6    7.53    0.83
  23   6   6    3.16    0.75
  23   7   6    2.61    0.73
  23   8   6   18.61    1.04
  23   9   6  127.51    2.54
  23  10   6    1.41    0.69
  23  11   6  190.68    3.24
  23   1   7    1.31    0.68
  23   2   7   29.78    1.21
  23   3   7   77.58    1.90
  23   4   7   44.73    1.45
  23   5   7   30.36    1.24
  23   6   7    2.27    0.73
  23   7   7  113.86    2.39
  23   8   7    5.83    0.81
  23   9   7   28.43    1.19
  23  10   7    0.26    0.65
  23   0   8   19.68    1.08
  23   1   8    2.29    0.75
  23   2   8    0.11    0.71
  23   3   8    2.25    0.75
  23   4   8    4.25    0.81
  23   5   8    4.04    0.79
  23   6   8   -0.32    0.69
  23   7   8   18.16    1.04
  23   8   8   94.73    2.11
  23   9   8    5.60    0.77
  23   1   9  108.47    2.34
  23   2   9    1.42    0.75
  23   3   9   26.44    1.20
  23   4   9    5.78    0.83
  23   5   9   -0.49    0.70
  23   6   9    2.00    0.75
  23   7   9    6.31    0.82
  23   8   9    3.28    0.76
  23   0  10    7.58    0.86
  23   1  10   35.16    1.33
  23   2  10    0.22    0.72
  23   3  10   11.78    0.94
  23   4  10   -0.59    0.69
  23   5  10    7.21    0.84
  23   6  10   -0.97    0.67
  23   7  10    2.28    0.75
  23   1  11   33.48    1.29
  23   2  11   77.93    1.90
  23   3  11    4.74    0.83
  23   4  11   -0.79    0.69
  24   0   0  108.09    2.16
  24   2   0    5.21    0.70
  24   4   0   21.10    1.00
  24   6   0  188.43    3.23
  24   8   0    0.65    0.67
  24  10   0   87.12    2.04
  24  12   0   15.87    0.96
  24   1   1   91.86    1.96
  24   2   1   -0.92    0.58
  24   3   1  176.30    3.03
  24   4   1   -1.19    0.57
  24   5   1   45.17    1.38
  24   6   1    8.94    0.81
  24   7   1   47.31    1.45
  24   8   1   26.20    1.15
  24   9   1    6.35    0.81
  24  10   1    4.28    0.77
  24  11   1   34.78    1.29
  24  12   1    0.52    0.66
  24  13   1    0.22    0.65
  24   0   2   99.26    2.06
  24   1   2   24.24    1.04
  24   2   2   -1.72    0.56
  24   3   2  102.39    2.13
  24   4   2   -0.75    0.59
  24   5   2    0.33    0.62
  24   6   2  105.21    2.21
  24   7   2   80.90    1.92
  24   8   2   -1.00    0.63
  24   9   2    4.99    0.78
  24  10   2   56.94    1.63
  24  11   2   24.68    1.13
  24  12   2    5.95    0.77
  24   1   3   76.82    1.79
  24   2   3    1.74    0.64
  24   3   3  166.65    2.94
  24   4   3   -0.51    0.60
  24   5   3    4.04    0.71
  24   6   3   49.13    1.47
  24   7   3   47.85    1.47
  24   8   3  124.70    2.51
  24   9   3    6.18    0.81
  24  10   3   12.17    0.92
  24  11   3    1.58    0.70
  24  12   3    3.15    0.71
  24   0   4   19.98    0.99
  24   1   4   53.14    1.49
  24   2   4   13.00    0.87
  24   3   4   -0.25    0.61
  24   4   4   53.67    1.52
  24   5   4   93.63    2.07
  24   6   4    4.76    0.75
  24   7   4   25.08    1.14
  24   8   4    2.09    0.71
  24   9   4   79.43    1.94
  24  10   4   10.47    0.89
  24  11   4   54.16    1.56
  24  12   4   -0.54    0.62
  24   1   5   69.80    1.74
  24   2   5    0.41    0.62
  24   3   5   31.39    1.20
  24   4   5    1.97    0.67
  24   5   5    6.62    0.79
  24   6   5    3.00    0.72
  24   7   5   55.43    1.60
  24   8   5   80.70    1.95
  24   9   5   82.22    1.96
  24  10   5    9.60    0.86
  24  11   5    4.63    0.74
  24   0   6   -1.04    0.62
  24   1   6   20.57    1.04
  24   2   6   26.20    1.14
  24   3   6   -0.43    0.65
  24   4   6   86.06    2.01
  24   5   6   -0.78    0.66
  24   6   6   13.84    0.96
  24   7   6   52.50    1.56
  24   8   6    2.77    0.73
  24   9   6    8.04    0.83
  24  10   6    1.68    0.68
  24  11   6    8.28    0.81
  24   1   7   53.85    1.57
  24   2   7   18.85    1.04
  24   3   7   53.31    1.58
  24   4   7   11.26    0.91
  24   5   7   -1.05    0.66
  24   6   7   36.98    1.34
  24   7   7   23.38    1.13
  24   8   7    5.39    0.80
  24   9   7   10.26    0.87
  24  10   7    1.62    0.67
  24   0   8    2.18    0.76
  24   1   8   12.97    0.97
  24   2   8    5.20    0.82
  24   3   8    2.55    0.76
  24   4   8   27.47    1.20
  24   5   8    5.50    0.81
  24   6   8   20.41    1.08
  24   7   8   22.60    1.10
  24   8   8    6.88    0.80
  24   9   8   82.33    1.90
  24   1   9    1.21    0.75
  24   2   9   24.91    1.17
  24   3   9    0.19    0.72
  24   4   9    5.76    0.83
  24   5   9    2.63    0.76
  24   6   9   62.26    1.68
  24   7   9    9.99    0.88
  24   0  10   11.56    0.93
  24   1  10   45.76    1.47
  24   2  10    4.82    0.80
  24   3  10   19.30    1.05
  24   4  10   10.40    0.89
  24   5  10   21.32    1.07
  24   1  11  105.40    2.24
  24   2  11   24.34    1.12
  25   1   0  317.36    4.71
  25   3   0  348.56    5.10
  25   5   0   61.81    1.64
  25   7   0   17.04    0.99
  25   9   0   91.75    2.10
  25  11   0   -0.93    0.65
  25   1   1    9.48    0.79
  25   2   1    4.42    0.70
  25   3   1    4.98    0.72
  25   4   1  221.35    3.62
  25   5   1   15.46    0.93
  25   6   1   74.92    1.84
  25   7   1    0.69    0.67
  25   8   1    3.03    0.73
  25   9   1    0.29    0.68
  25  10   1   43.52    1.43
  25  11   1    4.34    0.76
  25  12   1    4.40    0.73
  25   0   2   -0.10    0.60
  25   1   2   34.47    1.21
  25   2   2   -1.21    0.59
  25   3   2   34.26    1.22
  25   4   2   75.39    1.81
  25   5   2    1.45    0.66
  25   6   2  128.40    2.53
  25   7   2    1.65    0.69
  25   8   2   -0.76    0.65
  25   9   2    8.11    0.85
  25  10   2   -1.30    0.64
  25  11   2    7.31    0.81
  25  12   2    1.09    0.66
  25   1   3   23.37    1.05
  25   2   3   76.75    1.82
  25   3   3   44.45    1.38
  25   4   3   20.49    1.02
  25   5   3   -0.87    0.61
  25   6   3    6.37    0.79
  25   7   3  154.49    2.88
  25   8   3    4.19    0.76
  25   9   3   48.25    1.50
  25  10   3    9.26    0.86
  25  11   3    4.98    0.75
  25  12   3   -0.98    0.62
  25   0   4   73.02    1.78
  25   1   4   -0.35    0.60
  25   2   4    0.10    0.62
  25   3   4   16.04    0.95
  25   4   4   13.50    0.91
  25   5   4   24.50    1.11
  25   6   4  194.31    3.37
  25   7   4    1.81    0.71
  25   8   4    2.50    0.73
  25   9   4    6.10    0.80
  25  10   4    4.52    0.76
  25  11   4    3.67    0.72
  25   1   5   83.97    1.96
  25   2   5   15.38    0.95
  25   3   5  113.70    2.35
  25   4   5   33.21    1.26
  25   5   5   13.51    0.94
  25   6   5  112.13    2.36
  25   7   5  151.56    2.85
  25   8   5   29.35    1.21
  25   9   5   15.58    0.98
  25  10   5   11.54    0.88
  25  11   5   25.34    1.09
  25   0   6   55.95    1.60
  25   1   6   -1.82    0.63
  25   2   6    0.81    0.69
  25   3   6   22.44    1.11
  25   4   6    1.01    0.70
  25   5   6   78.47    1.93
  25   6   6   43.21    1.43
  25   7   6    2.99    0.74
  25   8   6   35.47    1.30
  25   9   6   23.30    1.09
  25  10   6    5.17    0.75
  25   1   7    3.17    0.75
  25   2   7    1.14    0.70
  25   3   7    6.33    0.82
  25   4   7   48.23    1.51
  25   5   7   -0.30    0.68
  25   6   7   71.17    1.83
  25   7   7   -0.69    0.67
  25   8   7   25.05    1.13
  25   9   7   38.51    1.30
  25   0   8   41.04    1.41
  25   1   8   41.88    1.43
  25   2   8   10.56    0.92
  25   3   8   51.64    1.56
  25   4   8   29.08    1.21
  25   5   8    9.24    0.87
  25   6   8    0.96    0.70
  25   7   8    8.22    0.83
  25   8   8   57.45    1.57
  25   1   9   16.63    1.03
  25   2   9    9.02    0.90
  25   3   9   25.67    1.17
  25   4   9    2.29    0.75
  25   5   9    5.33    0.80
  25   6   9   -0.48    0.68
  25   0  10   20.87    1.08
  25   1  10    4.26    0.78
  25   2  10   21.05    1.08
  25   3  10    0.37    0.69
  25   4  10   67.43    1.73
  26   0   0  202.23    3.38
  26   2   0    6.93    0.76
  26   4   0   97.14    2.12
  26   6   0    6.56    0.80
  26   8   0   -2.07    0.62
  26  10   0   69.99    1.79
  26  12   0    0.20    0.65
  26   1   1   57.30    1.56
  26   2   1   46.93    1.42
  26   3   1  112.58    2.30
  26   4   1   35.27    1.26
  26   5   1    5.97    0.77
  26   6   1    0.19    0.66
  26   7   1    0.42    0.67
  26   8   1    1.43    0.71
  26   9   1   60.49    1.68
  26  10   1    0.33    0.68
  26  11   1   14.64    0.94
  26   0   2    8.40    0.79
  26   1   2  113.09    2.30
  26   2   2    0.19    0.62
  26   3   2   74.16    1.81
  26   4   2    2.65    0.69
  26   5   2   16.24    0.97
  26   6   2   -0.33    0.65
  26   7   2    3.14    0.74
  26   8   2    2.76    0.74
  26   9   2   68.29    1.78
  26  10   2   24.50    1.12
  26  11   2   53.94    1.53
  26   1   3   12.87    0.88
  26   2   3    4.27    0.72
  26   3   3   -0.09    0.63
  26   4   3  172.83    3.08
  26   5   3   36.48    1.31
  26   6   3   50.72    1.53
  26   7   3   16.75    1.00
  26   8   3   28.21    1.20
  26   9   3   45.71    1.46
  26  10   3    9.47    0.85
  26  11   3   34.60    1.24
  26   0   4    5.21    0.75
  26   1   4   49.49    1.49
  26   2   4    7.41    0.80
  26   3   4   18.26    1.01
  26   4   4    2.25    0.70
  26   5   4   -0.70    0.65
  26   6   4   17.44    1.02
  26   7   4   60.87    1.68
  26   8   4   30.43    1.23
  26   9   4    8.66    0.85
  26  10   4    0.90    0.66
  26  11   4   13.36    0.90
  26   1   5  117.25    2.41
  26   2   5   46.14    1.45
  26   3   5   -0.04    0.66
  26   4   5   81.06    1.95
  26   5   5    0.23    0.67
  26   6   5   54.29    1.59
  26   7   5   14.99    0.97
  26   8   5   35.38    1.30
  26   9   5    3.76    0.73
  26  10   5    1.62    0.67
  26   0   6   -0.20    0.67
  26   1   6   81.33    1.96
  26   2   6   11.44    0.91
  26   3   6   12.07    0.93
  26   4   6   16.04    1.01
  26   5   6   36.82    1.34
  26   6   6   32.11    1.25
  26   7   6   17.96    1.02
  26   8   6   98.96    2.15
  26   9   6    2.39    0.70
  26   1   7   89.39    2.08
  26   2   7   53.74    1.59
  26   3   7    8.72    0.86
  26   4   7   -1.06    0.66
  26   5   7   -1.14    0.65
  26   6   7    1.46    0.71
  26   7   7   13.53    0.93
  26   8   7   15.24    0.95
  26   0   8   10.38    0.90
  26   1   8   38.55    1.37
  26   2   8    1.38    0.72
  26   3   8    0.37    0.69
  26   4   8   12.51    0.93
  26   5   8   74.69    1.85
  26   6   8    1.09    0.68
  26   7   8    2.00    0.70
  26   1   9   -0.81    0.69
  26   2   9  164.35    2.98
  26   3   9   23.63    1.12
  26   4   9    4.81    0.79
  26   5   9   -0.07    0.68
  26   0  10    5.77    0.82
  26   1  10    0.12    0.71
  26   2  10    7.72    0.85
  27   1   0    0.05    0.63
  27   3   0    5.49    0.76
  27   5   0    1.46    0.69
  27   7   0    8.88    0.86
  27   9   0   16.80    1.00
  27  11   0  119.97    2.37
  27   1   1    8.59    0.81
  27   2   1  109.41    2.28
  27   3   1   52.96    1.54
  27   4   1   -0.10    0.64
  27   5   1   -1.09    0.63
  27   6   1   23.81    1.12
  27   7   1   31.36    1.25
  27   8   1   36.86    1.33
  27   9   1    1.73    0.71
  27  10   1   45.46    1.43
  27  11   1    0.92    0.66
  27   0   2  188.98    3.26
  27   1   2    4.60    0.73
  27   2   2   18.65    1.00
  27   3   2   10.64    0.87
  27   4   2    0.41    0.66
  27   5   2    8.23    0.84
  27   6   2   25.89    1.16
  27   7   2   18.77    1.04
  27   8   2    3.40    0.75
  27   9   2    2.74    0.73
  27  10   2   30.62    1.20
  27  11   2   22.64    1.05
  27   1   3   68.89    1.76
  27   2   3   14.49    0.94
  27   3   3  135.71    2.64
  27   4   3    2.46    0.71
  27   5   3    5.50    0.78
  27   6   3   31.51    1.25
  27   7   3   58.49    1.65
  27   8   3    0.51    0.68
  27   9   3   -1.05    0.64
  27  10   3   39.99    1.33
  27   0   4   30.56    1.21
  27   1   4   -0.74    0.64
  27   2   4   11.13    0.89
  27   3   4    0.42    0.67
  27   4   4   78.84    1.92
  27   5   4   15.52    0.99
  27   6   4   45.23    1.46
  27   7   4    2.43    0.72
  27   8   4  103.30    2.23
  27   9   4   49.62    1.48
  27  10   4   24.42    1.08
  27   1   5    5.73    0.79
  27   2   5    0.31    0.67
  27   3   5   88.91    2.06
  27   4   5   12.60    0.94
  27   5   5    8.76    0.86
  27   6   5    3.59    0.75
  27   7   5   15.95    0.98
  27   8   5   33.75    1.26
  27   9   5   27.83    1.14
  27   0   6   66.50    1.77
  27   1   6    4.82    0.79
  27   2   6    8.41    0.87
  27   3   6    8.60    0.87
  27   4   6   11.30    0.90
  27   5   6   -0.73    0.65
  27   6   6   66.16    1.74
  27   7   6    5.27    0.77
  27   8   6    1.04    0.66
  27   1   7  103.26    2.25
  27   2   7   23.73    1.13
  27   3   7   65.46    1.74
  27   4   7    1.07    0.71
  27   5   7    1.05    0.70
  27   6   7   13.86    0.94
  27   7   7   14.04    0.93
  27   0   8   19.84    1.06
  27   1   8    3.87    0.77
  27   2   8   56.95    1.61
  27   3   8    2.75    0.73
  27   4   8   87.30    2.00
  27   5   8    0.90    0.68
  27   6   8   35.55    1.26
  27   1   9  115.16    2.35
  27   2   9   31.20    1.23
  27   3   9    4.44    0.79
  27   4   9    4.64    0.77
  28   0   0   74.44    1.84
  28   2   0    7.27    0.81
  28   4   0   29.47    1.21
  28   6   0   90.12    2.08
  28   8   0   -1.02    0.64
  28  10   0    0.20    0.65
  28   1   1   -0.70    0.63
  28   2   1   64.70    1.72
  28   3   1    8.00    0.83
  28   4   1   23.99    1.12
  28   5   1   -0.26    0.66
  28   6   1   94.00    2.13
  28   7   1  113.31    2.37
  28   8   1    0.04    0.67
  28   9   1   64.75    1.70
  28  10   1    3.31    0.71
  28   0   2    5.88    0.78
  28   1   2   48.83    1.49
  28   2   2    2.22    0.71
  28   3   2   73.52    1.85
  28   4   2  112.78    2.36
  28   5   2    5.57    0.79
  28   6   2   24.42    1.14
  28   7   2    5.00    0.78
  28   8   2   61.32    1.68
  28   9   2    0.44    0.66
  28  10   2    0.36    0.64
  28   1   3    0.33    0.67
  28   2   3   35.16    1.30
  28   3   3   -0.20    0.66
  28   4   3   78.78    1.92
  28   5   3    2.93    0.74
  28   6   3  100.32    2.21
  28   7   3    2.12    0.72
  28   8   3    9.66    0.87
  28   9   3   -0.46    0.63
  28  10   3   26.84    1.12
  28   0   4    4.52    0.77
  28   1   4  107.82    2.30
  28   2   4    4.77    0.77
  28   3   4   89.07    2.06
  28   4   4   -0.52    0.66
  28   5   4    2.98    0.74
  28   6   4    1.67    0.71
  28   7   4    3.87    0.75
  28   8   4   27.58    1.16
  28   9   4    1.09    0.66
  28   1   5   13.08    0.94
  28   2   5   30.57    1.24
  28   3   5    0.03    0.67
  28   4   5   56.87    1.62
  28   5   5   13.52    0.94
  28   6   5   14.90    0.97
  28   7   5   28.04    1.17
  28   8   5   -1.15    0.61
  28   0   6   10.38    0.90
  28   1   6   37.65    1.35
  28   2   6   20.78    1.07
  28   3   6    0.43    0.68
  28   4   6  134.19    2.62
  28   5   6   57.84    1.62
  28   6   6   16.53    0.98
  28   7   6    3.25    0.71
  28   8   6    7.07    0.79
  28   1   7    2.79    0.74
  28   2   7  200.32    3.42
  28   3   7    0.43    0.69
  28   4   7   19.15    1.03
  28   5   7    3.09    0.73
  28   6   7   18.56    1.01
  28   0   8   27.37    1.17
  28   1   8    2.88    0.73
  28   2   8    9.66    0.86
  28   3   8   34.06    1.25
  28   4   8    6.53    0.79
  28   5   8   81.98    1.89
  28   1   9    5.51    0.79
  29   1   0   94.24    2.12
  29   3   0   91.08    2.09
  29   5   0    9.26    0.87
  29   7   0   33.89    1.28
  29   9   0   -0.61    0.63
  29   1   1    1.90    0.71
  29   2   1    4.19    0.76
  29   3   1   17.48    1.02
  29   4   1   66.40    1.76
  29   5   1    1.23    0.70
  29   6   1  113.94    2.38
  29   7   1    1.24    0.69
  29   8   1    7.38    0.81
  29   9   1   17.18    0.97
  29   0   2    7.46    0.83
  29   1   2   29.03    1.21
  29   2   2    3.42    0.75
  29   3   2   15.33    0.98
  29   4   2    0.05    0.67
  29   5   2    2.77    0.73
  29   6   2    8.46    0.85
  29   7   2   25.02    1.14
  29   8   2   61.02    1.65
  29   9   2    1.10    0.66
  29   1   3   13.82    0.95
  29   2   3    3.55    0.75
  29   3   3   65.51    1.75
  29   4   3   -1.12    0.64
  29   5   3   -2.27    0.61
  29   6   3    3.55    0.75
  29   7   3   14.69    0.96
  29   8   3    0.28    0.65
  29   9   3  104.20    2.16
  29   0   4  190.57    3.33
  29   1   4   -1.02    0.65
  29   2   4   -0.43    0.66
  29   3   4   21.61    1.09
  29   4   4  118.66    2.44
  29   5   4   10.27    0.88
  29   6   4   -0.52    0.66
  29   7   4    2.24    0.70
  29   8   4    1.18    0.66
  29   1   5    1.79    0.71
  29   2   5   98.80    2.18
  29   3   5   79.14    1.93
  29   4   5   21.78    1.08
  29   5   5    5.10    0.78
  29   6   5   -0.93    0.63
  29   7   5   -0.11    0.64
  29   0   6    8.61    0.85
  29   1   6   14.55    0.96
  29   2   6   12.47    0.92
  29   3   6   64.91    1.72
  29   4   6   16.56    0.98
  29   5   6   29.85    1.19
  29   6   6   23.59    1.08
  29   1   7   20.43    1.05
  29   2   7   22.35    1.08
  29   3   7   52.46    1.53
  29   4   7   14.77    0.94
  29   5   7   15.32    0.95
  29   0   8    1.24    0.68
  29   1   8   18.03    0.99
  29   2   8   15.36    0.95
  29   3   8   26.61    1.13
  30   0   0   45.51    1.47
  30   2   0   30.32    1.23
  30   4   0   99.24    2.19
  30   6   0    7.98    0.84
  30   8   0  210.34    3.47
  30   1   1   12.21    0.93
  30   2   1    0.50    0.69
  30   3   1   96.44    2.16
  30   4   1    1.97    0.71
  30   5   1   -1.71    0.62
  30   6   1    6.12    0.80
  30   7   1   31.49    1.22
  30   8   1    6.41    0.78
  30   0   2  101.64    2.23
  30   1   2    2.48    0.73
  30   2   2    1.51    0.71
  30   3   2    5.62    0.79
  30   4   2   -0.56    0.66
  30   5   2   -0.12    0.67
  30   6   2   18.55    1.03
  30   7   2   -1.01    0.63
  30   8   2   19.97    1.01
  30   1   3    0.80    0.69
  30   2   3  136.78    2.67
  30   3   3    7.20    0.83
  30   4   3   -0.23    0.66
  30   5   3    0.54    0.68
  30   6   3    8.64    0.84
  30   7   3    1.79    0.68
  30   8   3    9.09    0.82
  30   0   4    1.52    0.70
  30   1   4    8.71    0.85
  30   2   4   31.38    1.25
  30   3   4   -0.43    0.66
  30   4   4   14.44    0.96
  30   5   4   45.86    1.44
  30   6   4   18.38    1.00
  30   7   4    2.67    0.70
  30   1   5   82.17    1.96
  30   2   5  160.52    2.94
  30   3   5    0.38    0.67
  30   4   5   15.85    0.97
  30   5   5    1.82    0.69
  30   6   5   30.72    1.19
  30   0   6  106.44    2.25
  30   1   6    2.62    0.71
  30   2   6   49.28    1.48
  30   3   6    0.40    0.66
  30   4   6   -0.27    0.64
  30   5   6   24.06    1.07
  30   1   7   41.16    1.35
  30   2   7   -0.18    0.66
  30   3   7    6.55    0.79
  31   1   0   26.94    1.18
  31   3   0   13.45    0.94
  31   5   0   15.01    0.97
  31   7   0   54.71    1.54
  31   1   1   -0.57    0.66
  31   2   1   84.94    2.00
  31   3   1    4.69    0.77
  31   4   1   23.01    1.10
  31   5   1   -1.09    0.64
  31   6   1   64.48    1.69
  31   7   1   28.88    1.16
  31   0   2    2.40    0.72
  31   1   2   55.86    1.60
  31   2   2   37.59    1.34
  31   3   2   15.54    0.98
  31   4   2  124.08    2.49
  31   5   2    8.19    0.83
  31   6   2    0.41    0.66
  31   7   2   10.05    0.84
  31   1   3   35.58    1.31
  31   2   3   97.45    2.15
  31   3   3    9.83    0.87
  31   4   3   17.41    1.00
  31   5   3    2.22    0.70
  31   6   3   45.58    1.41
  31   7   3   22.07    1.04
  31   0   4   15.77    0.98
  31   1   4    1.84    0.71
  31   2   4   38.90    1.35
  31   3   4   11.29    0.89
  31   4   4   54.05    1.55
  31   5   4   37.13    1.29
  31   6   4    1.65    0.68
  31   1   5   24.70    1.11
  31   2   5    0.75    0.67
  31   3   5   35.95    1.28
  31   4   5    2.29    0.69
  31   5   5   -0.05    0.63
  31   0   6   11.94    0.88
  31   1   6   18.62    1.00
  31   2   6    2.45    0.69
  31   3   6   58.53    1.57
  32   0   0  101.03    2.20
  32   2   0    8.02    0.84
  32   4   0   63.97    1.69
  32   6   0    1.19    0.66
  32   1   1   -0.65    0.65
  32   2   1   13.40    0.94
  32   3   1   67.60    1.75
  32   4   1    0.71    0.67
  32   5   1    0.04    0.64
  32   6   1    1.56    0.67
  32   0   2   24.45    1.12
  32   1   2    0.77    0.69
  32   2   2    7.98    0.83
  32   3   2   32.94    1.25
  32   4   2   11.45    0.88
  32   5   2   96.42    2.09
  32   6   2    5.63    0.75
  32   1   3   31.13    1.22
  32   2   3    9.43    0.85
  32   3   3   99.77    2.15
  32   4   3    0.88    0.66
  32   5   3    0.48    0.65
  32   0   4    0.11    0.65
  32   1   4   46.68    1.44
  32   2   4    4.43    0.74
  32   3   4   94.09    2.06
  32   4   4   -2.09    0.59
  32   1   5    1.86    0.68
  32   2   5   -0.11    0.64
  32   3   5   -0.14    0.64
  33   1   0   20.33    1.04
  33   3   0    7.53    0.80
  33   5   0  130.71    2.49
  33   1   1   32.38    1.23
  33   2   1  165.04    2.95
  33   3   1    8.64    0.82
  33   4   1    6.30    0.77
  33   5   1    2.47    0.69
  33   0   2   51.70    1.51
  33   1   2   -0.58    0.63
  33   2   2   28.17    1.15
  33   3   2   24.56    1.09
  33   4   2   12.48    0.88
  33   1   3   24.62    1.09
  33   2   3   30.44    1.18
  33   3   3    3.09    0.70
  33   0   4   29.21    1.15
  33   1   4    4.53    0.73
  33   2   4   20.13    1.01
  34   0   0    0.56    0.65
  34   2   0   90.60    2.00
  34   1   1   70.55    1.74
  34   2   1    6.04    0.76
  34   0   2   -0.14    0.63
  34   1   2   18.03    0.97
   0   0   0    0.00    0.00
;
_shelx_hkl_checksum   31696

data_SQDH2020

#------------------ Validation reply form -----------------------------------#
_vrf_CELLK01_SQDH2020
;
PROBLEM: Check that the cell measurement temperature is in Kelvin.
Value of measurement temperature given = 20.000
RESPONSE: That's correct. The data collection was performed at 20(1) K.
;
_vrf_PLAT218_SQDH2020
;
PROBLEM: Constrained U(ij) Components(s) for H1 . 6 Check
PROBLEM: Constrained U(ij) Components(s) for H2 . 6 Check
PROBLEM: Constrained U(ij) Components(s) for H3 . 6 Check
PROBLEM: Constrained U(ij) Components(s) for H4 . 6 Check
PROBLEM: Constrained U(ij) Components(s) for H5 . 6 Check
PROBLEM: Constrained U(ij) Components(s) for H6 . 6 Check
PROBLEM: Constrained U(ij) Components(s) for H7 . 6 Check
PROBLEM: Constrained U(ij) Components(s) for H8 . 6 Check
PROBLEM: Constrained U(ij) Components(s) for H9 . 6 Check
PROBLEM: Constrained U(ij) Components(s) for H10 . 6 Check
PROBLEM: Constrained U(ij) Components(s) for H11 . 6 Check
PROBLEM: Constrained U(ij) Components(s) for H12 . 6 Check
PROBLEM: Constrained U(ij) Components(s) for H13 . 6 Check
PROBLEM: Constrained U(ij) Components(s) for H14 . 6 Check
PROBLEM: Constrained U(ij) Components(s) for H15 . 6 Check
PROBLEM: Constrained U(ij) Components(s) for H16 . 6 Check
RESPONSE: Anisotropic U(ij) components were estimated by ADPH (Roversi & 
Destro, 2004) and never refined.
;
_vrf_PLAT230_SQDH2020
;
PROBLEM: Hirshfeld Test Diff for O2 --C5 . 5.5 s.u.
RESPONSE: This minor failure of the Hirshfeld rigid bond test is likely
due to the rigid body librational motion of the C~4~ ring, but it does
not hamper the accurate determination of the overall molecular charge 
density features.
; 
_vrf_PLAT351_SQDH2020
;
PROBLEM:Long C-H (X0.96,N1.08A) C8 - H10 . 1.11 Ang.
RESPONSE:Positions of H atoms were estimated from multipole refinements 
with polarized basis.
;
_vrf_PLAT751_SQDH2020
;
PROBLEM: Bond Calc 1.08000, Rep 1.0793(3) ...... Senseless s.u.
C3 -H3A 1.555 1.555 ........ # 7 Check
PROBLEM: Bond Calc 1.09000, Rep 1.0873(3) ...... Senseless s.u.
C3 -H3B 1.555 1.555 ........ # 8 Check
PROBLEM: Bond Calc 1.06000, Rep 1.0624(3) ...... Senseless s.u.
C3 -H3C 1.555 1.555 ........ # 9 Check
PROBLEM: Bond Calc 1.06000, Rep 1.0624(3) ...... Senseless s.u.
C4 -H4A 1.555 1.555 ........ # 11 Check
PROBLEM: Bond Calc 1.07000, Rep 1.0728(3) ...... Senseless s.u.
C4 -H4B 1.555 1.555 ........ # 12 Check
PROBLEM: Bond Calc 1.11000, Rep 1.1144(3) ...... Senseless s.u.
C4 -H4C 1.555 1.555 ........ # 13 Check
RESPONSE: Positions of H atoms were estimated from multipole refinements 
with polarized basis.
; 
_vrf_PLAT752_SQDH2020
;
PROBLEM: Angle Calc 110.00, Rep 110.44(6) ...... Senseless s.u.
H1 -C3 -H3 1.555 1.555 1.555 # 14 Check
PROBLEM: Angle Calc 110.00, Rep 110.22(5) ...... Senseless s.u.
H2 -C3 -H3 1.555 1.555 1.555 # 15 Check
PROBLEM: Angle Calc 108.00, Rep 107.99(5) ...... Senseless s.u.
N1 -C4 -H4 1.555 1.555 1.555 # 16 Check
PROBLEM: Angle Calc 110.00, Rep 109.52(5) ...... Senseless s.u.
N1 -C4 -H5 1.555 1.555 1.555 # 17 Check
PROBLEM: Angle Calc 109.00, Rep 109.12(6) ...... Senseless s.u.
H4 -C4 -H5 1.555 1.555 1.555 # 18 Check
PROBLEM: Angle Calc 109.00, Rep 108.77(5) ...... Senseless s.u.
N1 -C4 -H6 1.555 1.555 1.555 # 19 Check
PROBLEM: Angle Calc 111.00, Rep 110.59(5) ...... Senseless s.u.
H4 -C4 -H6 1.555 1.555 1.555 # 20 Check
PROBLEM: Angle Calc 111.00, Rep 110.81(5) ...... Senseless s.u.
H5 -C4 -H6 1.555 1.555 1.555 # 21 Check
PROBLEM: Angle Calc 109.00, Rep 109.00(5) ...... Senseless s.u.
N2 -C7 -H7 1.555 1.555 1.555 # 31 Check
PROBLEM: Angle Calc 109.00, Rep 109.48(5) ...... Senseless s.u.
N2 -C7 -H8 1.555 1.555 1.555 # 32 Check
PROBLEM: Angle Calc 110.00, Rep 110.33(5) ...... Senseless s.u.
H7 -C7 -H8 1.555 1.555 1.555 # 33 Check
PROBLEM: Angle Calc 109.00, Rep 109.35(5) ...... Senseless s.u.
N2 -C7 -H9 1.555 1.555 1.555 # 34 Check
PROBLEM: Angle Calc 108.00, Rep 107.65(5) ...... Senseless s.u.
H7 -C7 -H9 1.555 1.555 1.555 # 35 Check
PROBLEM: Angle Calc 111.00, Rep 110.98(5) ...... Senseless s.u.
H8 -C7 -H9 1.555 1.555 1.555 # 36 Check
PROBLEM: Angle Calc 109.00, Rep 108.99(5) ...... Senseless s.u.
N2 -C8 -H10 1.555 1.555 1.555 # 37 Check
PROBLEM: Angle Calc 109.00, Rep 108.53(5) ...... Senseless s.u.
N2 -C8 -H11 1.555 1.555 1.555 # 38 Check
PROBLEM: Angle Calc 111.00, Rep 111.01(5) ...... Senseless s.u.
H10 -C8 -H11 1.555 1.555 1.555 # 39 Check
PROBLEM: Angle Calc 109.00, Rep 109.17(5) ...... Senseless s.u.
N2 -C8 -H12 1.555 1.555 1.555 # 40 Check
PROBLEM: Angle Calc 110.00, Rep 110.08(5) ...... Senseless s.u.
H10 -C8 -H12 1.555 1.555 1.555 # 41 Check
PROBLEM: Angle Calc 109.00, Rep 109.03(5) ...... Senseless s.u.
H11 -C8 -H12 1.555 1.555 1.555 # 42 Check
PROBLEM: Angle Calc 104.00, Rep 103.66(5) ...... Senseless s.u.
H13 -O3 -H14 1.555 1.555 1.555 # 43 Check
PROBLEM: Angle Calc 108.00, Rep 108.13(5) ...... Senseless s.u.
H15 -O4 -H16 1.555 1.555 1.555 # 44 Check
RESPONSE: Positions of H atoms were estimated from multipole refinements 
with polarized basis.
;

_audit_creation_method            SHELXL-2014/4
_chemical_name_systematic         ?
_chemical_name_common           'bis(dimethylamino)squaraine dihydrate'
_chemical_melting_point           ?
_chemical_formula_moiety         'C8 H12 N2 O2, 2(H2 O)'
_chemical_formula_sum            'C8 H16 N2 O4' 
_chemical_formula_weight          204.23

loop_
 _atom_type_symbol
 _atom_type_description
 _atom_type_scat_dispersion_real
 _atom_type_scat_dispersion_imag
 _atom_type_scat_source
 'C'  'C'   0.0033   0.0016
 'International Tables Vol C Tables 4.2.6.8 and 6.1.1.4'
 'N'  'N'   0.0061   0.0033
 'International Tables Vol C Tables 4.2.6.8 and 6.1.1.4'
 'O'  'O'   0.0106   0.0060
 'International Tables Vol C Tables 4.2.6.8 and 6.1.1.4'
 'H'  'H'   0.0000   0.0000
 'International Tables Vol C Tables 4.2.6.8 and 6.1.1.4'
 
_space_group_crystal_system       monoclinic
_space_group_IT_number            14
_space_group_name_H-M_alt         'P 21/c'
_space_group_name_Hall            '-P 2ybc'
 
_shelx_space_group_comment
;
The symmetry employed for this shelxl refinement is uniquely defined
by the following loop, which should always be used as a source of
symmetry information in preference to the above space-group names.
They are only intended as comments.
;
 
loop_
 _space_group_symop_operation_xyz
 'x, y, z'
 '-x, y+1/2, -z+1/2'
 '-x, -y, -z'
 'x, -y-1/2, z-1/2'
 
_cell_length_a                    7.9590(10)
_cell_length_b                    7.1540(10)
_cell_length_c                    17.799(2)
_cell_angle_alpha                 90
_cell_angle_beta                  91.680(10)
_cell_angle_gamma                 90
_cell_volume                      1013.0(2)
_cell_formula_units_Z             4
_cell_measurement_temperature     20(1)
_cell_measurement_reflns_used     30
_cell_measurement_theta_min       13.860
_cell_measurement_theta_max       15.525
 
_exptl_crystal_description        prism
_exptl_crystal_colour             colourless
_exptl_crystal_density_meas       ?
_exptl_crystal_density_method     ?
_exptl_crystal_density_diffrn     1.339          
_exptl_crystal_F_000              440
_exptl_transmission_factor_min    ?
_exptl_transmission_factor_max    ?
_exptl_crystal_size_max           0.50
_exptl_crystal_size_mid           0.25
_exptl_crystal_size_min           0.15
_exptl_absorpt_coefficient_mu     0.107
_shelx_estimated_absorpt_T_min    ?
_shelx_estimated_absorpt_T_max    ?
_exptl_absorpt_correction_type    none
_exptl_absorpt_correction_T_min   0.968
_exptl_absorpt_correction_T_max   0.984
_exptl_absorpt_process_details    ?
_diffrn_ambient_temperature       20(1)
_diffrn_radiation_wavelength      0.71073
_diffrn_radiation_type            MoK\a
_diffrn_source                    'fine-focus sealed tube' 
_diffrn_measurement_device_type   'Syntex P1' 
_diffrn_measurement_method        'profile data from \q/2\q scans'
_diffrn_detector_area_resol_mean  ?
_diffrn_standards_number          3
_diffrn_standards_interval_count  100 
_diffrn_standards_interval_time   ?
_diffrn_standards_decay_%         3.125
_diffrn_reflns_number             5535
_diffrn_reflns_av_unetI/netI      0.0369
_diffrn_reflns_av_R_equivalents   0.0206
_diffrn_reflns_limit_h_min        0
_diffrn_reflns_limit_h_max        18
_diffrn_reflns_limit_k_min        0
_diffrn_reflns_limit_k_max        15
_diffrn_reflns_limit_l_min       -35
_diffrn_reflns_limit_l_max        38
_diffrn_reflns_theta_min          2.289
_diffrn_reflns_theta_max          54.629
_diffrn_reflns_theta_full         25.242
_diffrn_measured_fraction_theta_max   0.432
_diffrn_measured_fraction_theta_full  1.000
_diffrn_reflns_Laue_measured_fraction_max    0.432
_diffrn_reflns_Laue_measured_fraction_full   1.000
_diffrn_reflns_point_group_measured_fraction_max   0.432
_diffrn_reflns_point_group_measured_fraction_full  1.000
_reflns_number_total              5535
_reflns_number_gt                 4873
_reflns_threshold_expression      'I > 2\s(I)'
_reflns_Friedel_coverage          0.000
_reflns_Friedel_fraction_max      .
_reflns_Friedel_fraction_full     .
 
_reflns_special_details
;
 Data were apparently pre-merged, so _diffrn_reflns_number
 etc. will have to be added later.
 
 Reflections were merged by SHELXL according to the crystal
 class for the calculation of statistics and refinement.
 
 _reflns_Friedel_fraction is defined as the number of unique
 Friedel pairs measured divided by the number that would be
 possible theoretically, ignoring centric projections and
 systematic absences.
;
 
_computing_data_collection        'In-home programs'
_computing_cell_refinement        'In-home programs'
_computing_data_reduction         'In-home programs'
_computing_molecular_graphics     'Diamond 3.0 (Crystal Impact GbR, 2004)'
_computing_publication_material   'VALRAY (Carnegie Mellon University, 2000)'
_refine_special_details           ?

_refine_ls_structure_factor_coef  Fsqd
_refine_ls_matrix_type            full
_refine_ls_weighting_scheme       calc
_refine_ls_weighting_details
'w=1/[\s^2^(Fo^2^)+(0.0511P)^2^] where P=(Fo^2^+2Fc^2^)/3'
_atom_sites_solution_primary      direct
_atom_sites_solution_secondary    difmap
_atom_sites_solution_hydrogens    difmap
_refine_ls_hydrogen_treatment     noref
_refine_ls_extinction_method      none
_refine_ls_extinction_coef        .
_refine_ls_number_reflns          5535
_refine_ls_number_parameters      127
_refine_ls_number_restraints      0
_refine_ls_R_factor_all           0.0383
_refine_ls_R_factor_gt            0.0305
_refine_ls_wR_factor_ref          0.0867
_refine_ls_wR_factor_gt           0.0834
_refine_ls_goodness_of_fit_ref    1.052
_refine_ls_restrained_S_all       1.052
_refine_ls_shift/su_max           0.000
_refine_ls_shift/su_mean          0.000
 
loop_
 _atom_site_label
 _atom_site_type_symbol
 _atom_site_fract_x
 _atom_site_fract_y
 _atom_site_fract_z
 _atom_site_U_iso_or_equiv
 _atom_site_adp_type
 _atom_site_occupancy
 _atom_site_site_symmetry_order  
 _atom_site_calc_flag
 _atom_site_refinement_flags_posn
 _atom_site_refinement_flags_adp
 _atom_site_refinement_flags_occupancy
 _atom_site_disorder_assembly
 _atom_site_disorder_group
O1 O 0.23325(5) 0.12519(7) -0.05260(2) 0.00752(7) Uani 1 1 d . . . . .
N1 N 0.12205(6) 0.05849(7) 0.11923(3) 0.00612(7) Uani 1 1 d . . . . .
C1 C 0.10564(6) 0.05753(8) -0.02452(3) 0.00528(7) Uani 1 1 d . . . . .
C2 C 0.05267(7) 0.02480(8) 0.05253(3) 0.00522(7) Uani 1 1 d . . . . .
C3 C 0.28703(7) 0.14762(9) 0.12727(3) 0.00837(8) Uani 1 1 d . . . . .
C4 C 0.04149(8) 0.00726(9) 0.18913(3) 0.00863(9) Uani 1 1 d . . . . .
H1 H 0.3280 0.1862 0.0725 0.031 Uani 1 1 d . . . . .
H2 H 0.3755 0.0482 0.1540 0.034 Uani 1 1 d . . . . .
H3 H 0.2743 0.2714 0.1625 0.034 Uani 1 1 d . . . . .
H4 H 0.1248 -0.0818 0.2200 0.034 Uani 1 1 d . . . . .
H5 H -0.0747 -0.0678 0.1762 0.033 Uani 1 1 d . . . . .
H6 H 0.0170 0.1325 0.2204 0.034 Uani 1 1 d . . . . .
O2 O -0.06502(6) 0.43792(7) -0.12337(2) 0.00785(7) Uani 1 1 d . . . . .
N2 N -0.25783(6) 0.37451(7) 0.03615(3) 0.00584(7) Uani 1 1 d . . . . .
C5 C -0.03042(7) 0.47133(8) -0.05626(3) 0.00540(7) Uani 1 1 d . . . . .
C6 C -0.11324(6) 0.44514(8) 0.01544(3) 0.00517(7) Uani 1 1 d . . . . .
C7 C -0.37602(7) 0.28709(8) -0.01760(3) 0.00720(8) Uani 1 1 d . . . . .
C8 C -0.29948(7) 0.36354(9) 0.11564(3) 0.00860(8) Uani 1 1 d . . . . .
H7 H -0.3900 0.1404 -0.0031 0.030 Uani 1 1 d . . . . .
H8 H -0.3293 0.3007 -0.0736 0.029 Uani 1 1 d . . . . .
H9 H -0.4987 0.3530 -0.0134 0.030 Uani 1 1 d . . . . .
H10 H -0.3068 0.2149 0.1323 0.034 Uani 1 1 d . . . . .
H11 H -0.2034 0.4357 0.1483 0.032 Uani 1 1 d . . . . .
H12 H -0.4200 0.4321 0.1237 0.033 Uani 1 1 d . . . . .
O3 O 0.65587(6) 0.36146(7) -0.21433(3) 0.01048(8) Uani 1 1 d . . . . .
H13 H 0.6468 0.4675 -0.2475 0.029 Uani 1 1 d . . . . .
H14 H 0.7529 0.3897 -0.1828 0.029 Uani 1 1 d . . . . .
O4 O 0.36794(6) 0.16481(8) -0.19406(3) 0.01116(8) Uani 1 1 d . . . . .
H15 H 0.4678 0.2406 -0.1952 0.031 Uani 1 1 d . . . . .
H16 H 0.3285 0.1650 -0.1435 0.031 Uani 1 1 d . . . . .
 
loop_
 _atom_site_aniso_label
 _atom_site_aniso_U_11
 _atom_site_aniso_U_22
 _atom_site_aniso_U_33
 _atom_site_aniso_U_23
 _atom_site_aniso_U_13
 _atom_site_aniso_U_12
O1 0.00562(14) 0.00987(16) 0.00713(14) 0.00079(13) 0.00102(11) -0.00207(13)
N1 0.00550(15) 0.00852(17) 0.00432(14) -0.00036(13) -0.00040(11) -0.00133(13)
C1 0.00491(16) 0.00604(17) 0.00489(16) -0.00009(14) -0.00003(13) 0.00000(14)
C2 0.00473(16) 0.00608(17) 0.00482(16) -0.00026(13) -0.00014(13) -0.00004(13)
C3 0.00626(18) 0.0107(2) 0.00805(19) -0.00092(16) -0.00113(14) -0.00218(15)
C4 0.00910(19) 0.0122(2) 0.00460(17) 0.00045(16) 0.00083(14) -0.00093(17)
H1 0.027 0.045 0.022 -0.012 -0.001 0.001
H2 0.029 0.033 0.038 0.000 -0.015 -0.001
H3 0.029 0.036 0.036 -0.001 -0.007 -0.018
H4 0.037 0.045 0.019 0.010 -0.001 0.002
H5 0.030 0.050 0.020 -0.014 0.000 0.000
H6 0.049 0.035 0.019 0.003 0.003 -0.004
O2 0.00796(15) 0.01099(17) 0.00453(13) -0.00111(12) -0.00112(11) -0.00107(13)
N2 0.00475(15) 0.00784(17) 0.00494(15) -0.00023(13) 0.00027(11) -0.00152(13)
C5 0.00488(16) 0.00603(18) 0.00527(16) -0.00011(14) -0.00024(13) -0.00024(13)
C6 0.00454(16) 0.00579(17) 0.00516(16) -0.00019(14) -0.00020(13) -0.00016(14)
C7 0.00593(18) 0.00825(19) 0.00735(18) -0.00087(15) -0.00101(14) -0.00133(15)
C8 0.00824(19) 0.0122(2) 0.00540(18) 0.00027(16) 0.00113(14) -0.00184(17)
H7 0.033 0.023 0.034 -0.007 -0.008 0.002
H8 0.026 0.041 0.021 -0.011 0.001 -0.003
H9 0.019 0.036 0.037 0.002 -0.004 -0.009
H10 0.044 0.031 0.026 -0.006 0.007 0.004
H11 0.028 0.047 0.021 -0.014 0.001 -0.003
H12 0.025 0.048 0.026 0.005 0.006 0.001
O3 0.00908(16) 0.01227(19) 0.00997(16) 0.00179(14) -0.00206(13) -0.00316(14)
H13 0.028 0.031 0.027 -0.006 -0.004 0.006
H14 0.025 0.034 0.027 -0.007 -0.006 0.002
O4 0.01109(17) 0.0143(2) 0.00817(16) -0.00216(14) 0.00187(13) -0.00470(15)
H15 0.029 0.036 0.027 -0.012 0.004 -0.004
H16 0.032 0.038 0.022 -0.009 0.006 -0.004
 
_geom_special_details
;
 All esds (except the esd in the dihedral angle between two l.s. planes)
 are estimated using the full covariance matrix.  The cell esds are taken
 into account individually in the estimation of esds in distances, angles
 and torsion angles; correlations between esds in cell parameters are only
 used when they are defined by crystal symmetry.  An approximate (isotropic)
 treatment of cell esds is used for estimating esds involving l.s. planes.
;
 
loop_
 _geom_bond_atom_site_label_1
 _geom_bond_atom_site_label_2
 _geom_bond_distance
 _geom_bond_site_symmetry_2
 _geom_bond_publ_flag
O1 C1 1.2431(7) . ?
N1 C2 1.3167(7) . ?
N1 C4 1.4630(8) . ?
N1 C3 1.4630(8) . ?
C1 C2 1.4649(8) 3 ?
C1 C2 1.4655(8) . ?
C2 C1 1.4649(8) 3 ?
C3 H1 1.0735(6) . ?
C3 H2 1.0989(6) . ?
C3 H3 1.0911(6) . ?
C4 H4 1.0614(6) . ?
C4 H5 1.0885(6) . ?
C4 H6 1.0757(6) . ?
O2 C5 1.2411(7) . ?
N2 C6 1.3192(7) . ?
N2 C7 1.4624(7) . ?
N2 C8 1.4647(7) . ?
C5 C6 1.4641(7) 3_565 ?
C5 C6 1.4656(8) . ?
C6 C5 1.4641(7) 3_565 ?
C7 H7 1.0869(6) . ?
C7 H8 1.0785(6) . ?
C7 H9 1.0886(6) . ?
C8 H10 1.1059(7) . ?
C8 H11 1.0780(6) . ?
C8 H12 1.0908(6) . ?
O3 H13 0.9622(5) . ?
O3 H14 0.9625(5) . ?
O4 H15 0.9628(5) . ?
O4 H16 0.9621(5) . ?
 
loop_
 _geom_angle_atom_site_label_1
 _geom_angle_atom_site_label_2
 _geom_angle_atom_site_label_3
 _geom_angle
 _geom_angle_site_symmetry_1
 _geom_angle_site_symmetry_3
 _geom_angle_publ_flag
C2 N1 C4 122.56(5) . . ?
C2 N1 C3 121.30(5) . . ?
C4 N1 C3 116.13(5) . . ?
O1 C1 C2 136.42(5) . 3 ?
O1 C1 C2 134.37(5) . . ?
C2 C1 C2 89.21(4) 3 . ?
N1 C2 C1 135.57(5) . 3 ?
N1 C2 C1 133.63(5) . . ?
C1 C2 C1 90.80(4) 3 . ?
N1 C3 H1 108.59(5) . . ?
N1 C3 H2 108.79(5) . . ?
H1 C3 H2 110.60(5) . . ?
N1 C3 H3 108.14(5) . . ?
H1 C3 H3 110.44(6) . . ?
H2 C3 H3 110.22(5) . . ?
N1 C4 H4 107.99(5) . . ?
N1 C4 H5 109.52(5) . . ?
H4 C4 H5 109.12(6) . . ?
N1 C4 H6 108.77(5) . . ?
H4 C4 H6 110.59(5) . . ?
H5 C4 H6 110.81(5) . . ?
C6 N2 C7 122.05(5) . . ?
C6 N2 C8 120.95(5) . . ?
C7 N2 C8 116.72(5) . . ?
O2 C5 C6 134.77(5) . 3_565 ?
O2 C5 C6 136.11(5) . . ?
C6 C5 C6 89.12(4) 3_565 . ?
N2 C6 C5 133.84(5) . 3_565 ?
N2 C6 C5 135.28(5) . . ?
C5 C6 C5 90.88(4) 3_565 . ?
N2 C7 H7 109.00(5) . . ?
N2 C7 H8 109.48(5) . . ?
H7 C7 H8 110.33(5) . . ?
N2 C7 H9 109.35(5) . . ?
H7 C7 H9 107.65(5) . . ?
H8 C7 H9 110.98(5) . . ?
N2 C8 H10 108.99(5) . . ?
N2 C8 H11 108.53(5) . . ?
H10 C8 H11 111.01(5) . . ?
N2 C8 H12 109.17(5) . . ?
H10 C8 H12 110.08(5) . . ?
H11 C8 H12 109.03(5) . . ?
H13 O3 H14 103.66(5) . . ?
H15 O4 H16 108.13(5) . . ?
 
_refine_diff_density_max    0.460
_refine_diff_density_min   -0.433
_refine_diff_density_rms    0.068

_shelxl_version_number 2014/4

_shelx_res_file
;
TITL bis(dma)squaraine dihydrate at T=20K july 2020
CELL 0.71073  7.959  7.154  17.799  90.00  91.68  90.00
ZERR    4.00   0.0010  0.0010  0.0020  0.00   0.01   0.00
LATT 1
SYMM -X, .5+Y, .5-Z
SFAC C N O H
UNIT 32 8 16 64
MERG 2
L.S. 30
BOND 0.5
BOND $H
ACTA
FMAP 2
PLAN 20
WGHT    0.051100
FVAR       0.99393
MOLE   1
O1    3    0.233250    0.125188   -0.052599    11.00000    0.00562    0.00987 =
         0.00713    0.00079    0.00102   -0.00207
N1    2    0.122048    0.058494    0.119226    11.00000    0.00550    0.00852 =
         0.00432   -0.00036   -0.00040   -0.00133
C1    1    0.105635    0.057526   -0.024525    11.00000    0.00491    0.00604 =
         0.00489   -0.00009   -0.00003    0.00000
C2    1    0.052671    0.024797    0.052534    11.00000    0.00473    0.00608 =
         0.00482   -0.00026   -0.00014   -0.00004
C3    1    0.287031    0.147623    0.127268    11.00000    0.00626    0.01070 =
         0.00805   -0.00092   -0.00113   -0.00218
C4    1    0.041491    0.007259    0.189134    11.00000    0.00910    0.01223 =
         0.00460    0.00045    0.00083   -0.00093
H1    4   10.328001   10.186200   10.072469    11.00000   10.02666   10.04485 =
        10.02166    9.98832    9.99877   10.00098
H2    4   10.375469   10.048241   10.153991    11.00000   10.02902   10.03253 =
        10.03845    9.99970    9.98548    9.99937
H3    4   10.274269   10.271370   10.162480    11.00000   10.02878   10.03606 =
        10.03620    9.99899    9.99290    9.98184
H4    4   10.124750    9.918190   10.220050    11.00000   10.03665   10.04512 =
        10.01945   10.00966    9.99860   10.00156
H5    4    9.925270    9.932179   10.176160    11.00000   10.02952   10.04976 =
        10.02025    9.98636   10.00049   10.00045
H6    4   10.017030   10.132529   10.220400    11.00000   10.04882   10.03462 =
        10.01944   10.00336   10.00260    9.99576
O2    3   -0.065019    0.437919   -0.123371    11.00000    0.00796    0.01099 =
         0.00453   -0.00111   -0.00112   -0.00107
N2    2   -0.257829    0.374507    0.036150    11.00000    0.00475    0.00784 =
         0.00494   -0.00023    0.00027   -0.00152
C5    1   -0.030416    0.471326   -0.056264    11.00000    0.00488    0.00603 =
         0.00527   -0.00011   -0.00024   -0.00024
C6    1   -0.113243    0.445142    0.015445    11.00000    0.00454    0.00579 =
         0.00516   -0.00019   -0.00020   -0.00016
C7    1   -0.376024    0.287091   -0.017601    11.00000    0.00593    0.00825 =
         0.00735   -0.00087   -0.00101   -0.00133
C8    1   -0.299477    0.363538    0.115641    11.00000    0.00824    0.01222 =
         0.00540    0.00027    0.00113   -0.00184
H7    4    9.609981   10.140450    9.996920    11.00000   10.03325   10.02336 =
        10.03429    9.99267    9.99167   10.00242
H8    4    9.670680   10.300710    9.926390    11.00000   10.02615   10.04143 =
        10.02082    9.98944   10.00094    9.99694
H9    4    9.501301   10.352961    9.986568    11.00000   10.01852   10.03595 =
        10.03667   10.00231    9.99631    9.99052
H10   4    9.693151   10.214890   10.132270    11.00000   10.04410   10.03094 =
        10.02585    9.99433   10.00666   10.00411
H11   4    9.796579   10.435689   10.148271    11.00000   10.02832   10.04737 =
        10.02087    9.98573   10.00110    9.99685
H12   4    9.579989   10.432109   10.123741    11.00000   10.02532   10.04848 =
        10.02611   10.00461   10.00605   10.00054
O3    3    0.655874    0.361458   -0.214327    11.00000    0.00908    0.01227 =
         0.00997    0.00179   -0.00206   -0.00316
H13   4   10.646780   10.467500    9.752549    11.00000   10.02843   10.03135 =
        10.02726    9.99386    9.99646   10.00565
H14   4   10.752910   10.389709    9.817181    11.00000   10.02510   10.03437 =
        10.02744    9.99266    9.99426   10.00249
O4    3    0.367941    0.164809   -0.194058    11.00000    0.01109    0.01432 =
         0.00817   -0.00216    0.00187   -0.00470
H15   4   10.467820   10.240560    9.804810    11.00000   10.02879   10.03625 =
        10.02675    9.98841   10.00420    9.99590
H16   4   10.328481   10.165010    9.856520    11.00000   10.03179   10.03790 =
        10.02218    9.99084   10.00570    9.99584
HKLF 4

REM  bis(dma)squaraine dihydrate at T=20K july 2020
REM R1 =  0.0305 for    4873 Fo > 4sig(Fo)  and  0.0383 for all    5535 data
REM    127 parameters refined using      0 restraints

END

WGHT      0.0512      0.0000

REM Highest difference peak  0.460,  deepest hole -0.433,  1-sigma level  0.068
Q1    1   0.0911  0.0421  0.0156  11.00000  0.05    0.46
Q2    1  -0.0845  0.4497 -0.0216  11.00000  0.05    0.45
Q3    1  -0.1857  0.4151  0.0268  11.00000  0.05    0.43
Q4    1  -0.0237 -0.0182  0.0447  11.00000  0.05    0.42
Q5    1  -0.0547  0.4806  0.0389  11.00000  0.05    0.41
Q6    1   0.0855  0.0529  0.0888  11.00000  0.05    0.41
Q7    1  -0.0399  0.4429 -0.0895  11.00000  0.05    0.40
Q8    1  -0.4529  0.3267 -0.0160  11.00000  0.05    0.39
Q9    1  -0.3714  0.4133  0.1241  11.00000  0.05    0.38
Q10   1   0.3356  0.0972  0.1426  11.00000  0.05    0.38
Q11   1  -0.3006  0.2694  0.1281  11.00000  0.05    0.36
Q12   1  -0.3876  0.1967 -0.0074  11.00000  0.05    0.36
Q13   1   0.2756  0.2293  0.1503  11.00000  0.05    0.36
Q14   1  -0.0414 -0.0284  0.1833  11.00000  0.05    0.35
Q15   1   0.3130  0.1860  0.0980  11.00000  0.05    0.35
Q16   1   0.0847  0.0394  0.1477  11.00000  0.05    0.34
Q17   1   0.0210  0.0827  0.2072  11.00000  0.05    0.34
Q18   1   0.0979 -0.0595  0.2039  11.00000  0.05    0.34
Q19   1   0.1642  0.0974 -0.0374  11.00000  0.05    0.34
Q20   1  -0.3570  0.3160 -0.0530  11.00000  0.05    0.34
;
_shelx_res_checksum   37393

_shelx_hkl_file
;
   1   0   0 4163.07   65.00
   2   0   0  528.41   10.90
   3   0   0 7985.80  127.90
   4   0   0  529.66   10.90
   5   0   0  953.19   16.60
   6   0   0  535.03   10.50
   7   0   0  495.07   10.10
   8   0   0  315.55    7.50
   9   0   0   15.71    2.80
  10   0   0  141.07    5.30
  11   0   0   14.34    3.30
  12   0   0  499.96   11.70
  13   0   0  149.87    6.30
  14   0   0   53.15    4.60
  15   0   0  118.54    6.10
  17   0   0  115.62    6.00
   1   1   0  100.70    2.80
   2   1   0  503.39   10.00
   3   1   0   77.16    3.40
   4   1   0  294.77    6.80
   5   1   0   25.32    2.80
   6   1   0    2.20    2.40
   7   1   0   50.45    3.30
   8   1   0    3.07    2.40
   9   1   0   -1.87    2.40
  10   1   0   18.89    3.10
  11   1   0   21.47    3.40
   0   2   0 4693.55   77.10
   1   2   014200.68  220.20
   2   2   0 4230.27   68.80
   3   2   0  137.01    4.30
   4   2   0    3.12    2.10
   5   2   0  344.01    7.60
   6   2   0  335.14    7.60
   7   2   0    2.90    2.50
   8   2   0   68.59    3.60
   9   2   0    7.18    2.70
  10   2   0   26.00    3.30
  11   2   0  252.09    7.50
  12   2   0   64.26    4.50
  13   2   0  251.62    8.00
  14   2   0  126.49    6.10
   1   3   0   -0.05    2.80
   2   3   0   58.80    3.30
   3   3   0    2.95    2.40
   4   3   0  328.16    8.40
   5   3   0  110.41    4.30
   6   3   0   -0.44    2.80
   7   3   0  203.10    5.80
   8   3   0   18.68    2.90
   9   3   0    7.17    2.90
  10   3   0   13.62    3.30
  11   3   0   99.68    5.10
   0   4   0 1334.54   22.40
   1   4   0 1730.80   29.70
   2   4   0 4206.78   72.60
   3   4   0   69.37    4.20
   4   4   0  120.79    4.60
   5   4   0   84.85    4.50
   6   4   0   10.00    2.80
   7   4   0    4.64    2.60
   8   4   0  100.92    4.40
   9   4   0   63.35    4.10
  10   4   0    2.63    3.10
  11   4   0   64.33    4.50
  12   4   0  112.96    5.60
  13   4   0   49.71    4.60
  14   4   0   58.84    4.90
   1   5   0    2.84    3.40
   2   5   0    6.09    3.40
   3   5   0    5.70    3.20
   4   5   0   14.04    3.70
   5   5   0   84.37    4.50
   6   5   0  357.40    8.40
   7   5   0    2.55    2.80
   8   5   0   10.86    3.10
   9   5   0    1.61    3.10
  10   5   0   52.43    4.30
  14   5   0  125.30    6.30
   0   6   0  200.52    6.30
   1   6   0  169.84    5.90
   2   6   0   10.57    3.70
   3   6   0  727.62   14.20
   4   6   0  110.35    4.70
   5   6   0   90.00    4.60
   6   6   0  126.23    5.10
   7   6   0    5.18    3.20
   8   6   0   35.22    3.90
   9   6   0  140.64    5.80
  10   6   0   68.63    4.70
  12   6   0   44.16    4.50
   1   7   0   79.26    4.50
   2   7   0   46.40    3.90
   3   7   0   12.57    4.00
   4   7   0   55.16    4.10
   5   7   0   39.44    4.20
   6   7   0   11.71    3.50
   7   7   0    7.28    3.50
   8   7   0    1.77    3.50
  10   7   0   70.48    4.90
   0   8   0    9.95    3.40
   1   8   0  154.56    6.20
   2   8   0  355.00    9.30
   3   8   0  218.41    7.20
   4   8   0  930.49   18.10
   5   8   0  105.49    5.40
   6   8   0    8.54    3.70
   7   8   0    4.50    3.70
   8   8   0   42.01    4.50
   9   8   0   63.73    4.90
  10   8   0  137.06    6.40
   1   9   0    3.34    4.10
   2   9   0   29.45    4.40
   3   9   0   16.62    4.40
   4   9   0   10.33    4.50
   5   9   0   57.15    4.90
   6   9   0   60.19    5.00
  10   9   0   39.96    4.90
  12   9   0  105.57    6.20
  13   9   0   82.98    6.10
   0  10   0  490.77   12.20
   1  10   0   50.63    5.30
   2  10   0   16.76    4.80
   3  10   0    2.91    4.60
   4  10   0  107.53    6.20
   5  10   0  291.78    9.20
   6  10   0   13.53    4.40
   9  10   0   67.51    5.50
  10  10   0   48.33    5.10
   1  11   0   30.09    5.20
   2  11   0   65.51    5.70
   3  11   0   -2.95    4.20
   4  11   0    6.80    4.50
   5  11   0   85.95    6.30
   6  11   0   19.96    5.50
   7  11   0   67.81    5.70
   9  11   0   44.93    5.30
  12  11   0  119.89    6.50
   0  12   0  250.09    9.20
   1  12   0    7.57    5.30
   2  12   0   43.72    5.90
   3  12   0    3.66    5.00
   4  12   0    7.87    4.90
   5  12   0   12.00    5.10
   6  12   0   33.13    5.40
   8  12   0   55.78    5.80
   1  13   0   40.21    5.80
   2  13   0   60.02    6.10
   3  13   0   16.88    5.30
   4  13   0   63.99    6.10
   6  13   0   56.28    6.50
   0  14   0   87.13    7.90
   1  14   0    6.56    6.20
   2  14   0   21.81    6.50
   3  14   0    3.55    6.40
   0   1   1   10.53    0.80
   1   1   1  159.03    3.20
   1   1  -1   42.10    2.00
   2   1   1 1406.88   24.60
   2   1  -1  574.98   11.80
   3   1   1   68.61    2.80
   3   1  -1  702.91   14.30
   4   1   1   61.02    2.60
   4   1  -1  184.93    5.90
   5   1   1   72.60    3.20
   5   1  -1  107.24    5.00
   6   1   1  253.24    6.30
   6   1  -1  619.67   11.80
   7   1   1   21.44    2.80
   7   1  -1   19.82    2.70
   8   1   1  152.81    5.00
   8   1  -1  322.18    7.60
   9   1   1   65.55    3.70
   9   1  -1    9.74    2.70
  10   1   1   18.94    3.20
  10   1  -1   23.68    3.20
  11   1   1  251.27    7.50
  11   1  -1   14.96    3.30
  15   1  -1   70.32    5.20
  17   1   1   72.49    5.20
  18   1   1   54.79    4.70
   0   2   1  316.18    7.60
   1   2   116764.01  258.80
   1   2  -1 8617.76  136.50
   2   2   1  753.24   13.00
   2   2  -1    7.04    3.10
   3   2   1  148.32    3.90
   3   2  -1  219.11    6.40
   4   2   1  664.59   11.90
   4   2  -1 1467.93   27.50
   5   2   1   36.24    3.00
   5   2  -1 1152.50   19.70
   6   2   1   18.83    2.80
   6   2  -1  100.60    4.00
   7   2   1  373.61    8.40
   7   2  -1  258.72    6.50
   8   2   1  117.33    4.50
   8   2  -1   27.32    2.90
   9   2   1  100.03    4.40
   9   2  -1   60.04    3.70
  10   2   1    6.39    3.00
  10   2  -1   40.49    3.60
  11   2  -1   59.57    4.20
  13   2   1   99.06    5.40
  15   2  -1  197.33    7.50
  16   2   1  134.72    6.50
   0   3   1   39.10    2.80
   1   3   1  651.94   11.70
   1   3  -1  426.80   10.40
   2   3   1  519.06    9.70
   2   3  -1  236.22    7.00
   3   3   1  460.60    9.00
   3   3  -1  711.60   15.50
   4   3   1  117.88    4.30
   4   3  -1   31.93    4.10
   5   3   1   66.56    3.60
   5   3  -1  800.53   14.60
   6   3   1  541.80   10.90
   6   3  -1  480.93   10.00
   7   3   1   -0.88    2.40
   7   3  -1   -0.58    2.40
   8   3   1  113.38    4.50
   8   3  -1  166.58    5.40
   9   3   1  503.26   11.00
   9   3  -1   81.89    4.20
  10   3   1   65.93    4.30
  10   3  -1   -1.32    2.90
  11   3   1   39.09    3.90
  14   3  -1   61.15    4.90
  15   3   1   63.36    5.00
  16   3   1   99.61    5.80
   0   4   1  708.30   13.00
   1   4   1  667.66   12.40
   1   4  -1   -0.57    3.20
   2   4   1 4820.14   82.00
   2   4  -1 1758.15   33.00
   3   4   1 1813.84   29.90
   3   4  -1  825.28   18.30
   4   4   1   63.17    3.70
   4   4  -1  740.40   13.90
   5   4   1  189.23    6.10
   5   4  -1  148.34    5.40
   6   4   1  105.06    4.30
   6   4  -1   10.39    3.00
   7   4   1  157.66    5.20
   7   4  -1    3.27    2.50
   8   4   1   10.06    2.90
   8   4  -1   38.06    3.30
   9   4   1   14.08    3.20
   9   4  -1   23.21    3.30
  10   4   1   68.95    4.40
  10   4  -1  340.05    8.90
  11   4  -1   44.48    4.20
  12   4  -1  111.74    5.60
  14   4   1   60.40    4.90
  14   4  -1  125.24    6.20
   0   5   1    0.39    3.40
   1   5   1   48.33    3.90
   1   5  -1   15.85    3.50
   2   5   1   37.85    3.60
   2   5  -1  127.71    5.10
   3   5   1   -2.24    3.10
   3   5  -1   81.36    4.30
   4   5   1   -0.23    3.40
   4   5  -1  116.73    5.10
   5   5   1  392.60    9.10
   5   5  -1    1.81    3.20
   6   5   1  107.06    4.50
   6   5  -1   33.46    3.30
   7   5   1   10.03    3.00
   7   5  -1   55.31    3.70
   8   5   1  122.27    5.10
   8   5  -1  109.04    4.80
   9   5   1   77.55    4.50
   9   5  -1   40.07    3.80
  10   5   1   61.21    4.40
  10   5  -1   15.68    3.60
  11   5  -1   30.07    4.00
  15   5   1   62.85    5.20
   0   6   1  150.83    5.60
   1   6   1   89.03    4.60
   1   6  -1  348.38    8.60
   2   6   1  787.86   15.20
   2   6  -1  326.70    8.30
   3   6   1 2173.64   35.90
   3   6  -1 2606.83   42.40
   4   6   1  335.86    8.20
   4   6  -1   49.23    3.70
   5   6   1   64.77    4.20
   5   6  -1   71.11    4.20
   6   6   1    4.97    3.10
   6   6  -1  267.53    7.30
   7   6   1    2.49    3.10
   7   6  -1   -0.34    3.00
   8   6   1   -2.80    3.20
   8   6  -1   -0.13    3.20
   9   6  -1   69.97    4.70
  11   6  -1  387.69   10.30
  12   6  -1  124.89    6.10
  13   6  -1   52.75    4.90
  14   6   1   65.72    5.20
  15   6   1   75.08    5.50
   0   7   1   90.46    4.70
   1   7   1    5.22    3.30
   1   7  -1    2.11    3.30
   2   7   1   15.69    3.40
   2   7  -1  159.38    5.70
   3   7   1   59.69    4.70
   3   7  -1   15.68    4.00
   4   7   1  137.30    5.50
   4   7  -1   89.48    4.70
   5   7   1   76.90    4.80
   5   7  -1  759.67   15.10
   6   7   1    6.94    3.40
   6   7  -1   45.09    4.10
   7   7   1  357.11    9.30
   7   7  -1   23.30    3.80
   8   7   1  226.72    7.40
   8   7  -1  108.10    5.40
   9   7  -1  280.82    8.40
  10   7  -1  107.71    5.60
  12   7  -1  125.10    6.20
  13   7   1  113.68    6.10
   0   8   1   30.02    4.50
   1   8   1  248.18    7.60
   1   8  -1    4.71    3.80
   2   8   1  129.62    5.70
   2   8  -1   64.25    4.80
   3   8   1   61.89    4.80
   3   8  -1    1.07    3.70
   4   8   1  388.45    9.90
   4   8  -1   64.08    4.80
   5   8   1   38.97    4.40
   5   8  -1  183.52    6.70
   6   8   1   -3.42    3.50
   6   8  -1    6.39    3.60
   7   8   1   99.43    5.40
   7   8  -1   19.15    4.10
   8   8  -1  123.12    6.00
  10   8  -1   87.45    5.50
  11   8  -1   67.84    5.20
   0   9   1   28.02    4.40
   1   9   1   41.41    4.60
   1   9  -1   83.53    5.40
   2   9   1   60.35    5.00
   2   9  -1    9.62    4.10
   3   9   1   87.36    5.50
   3   9  -1   18.06    4.30
   4   9   1   -1.19    4.30
   4   9  -1  235.26    8.00
   5   9   1   -1.61    3.90
   5   9  -1   34.06    4.50
   6   9   1  132.49    6.20
   6   9  -1   87.59    5.50
   7   9   1   93.89    5.60
   8   9   1  104.88    5.80
   8   9  -1   72.67    5.30
  10   9  -1   61.39    5.20
  11   9  -1  126.86    6.50
   0  10   1   13.25    4.80
   1  10   1   84.61    5.80
   1  10  -1  160.97    7.20
   2  10   1    1.05    4.50
   2  10  -1   91.74    6.10
   3  10   1   -0.12    4.50
   3  10  -1  234.44    8.40
   4  10   1    3.93    4.40
   4  10  -1   80.87    5.80
   5  10   1  312.44    9.50
   5  10  -1   73.99    5.70
   6  10   1  274.98    8.80
   6  10  -1   21.32    4.60
   7  10  -1   63.61    5.40
   8  10   1   70.42    5.50
   8  10  -1   38.40    5.00
   9  10   1   62.39    5.40
   9  10  -1   94.93    6.00
   0  11   1   34.66    5.30
   1  11   1   -0.50    4.60
   1  11  -1    9.96    4.80
   2  11   1    1.30    4.50
   2  11  -1   -2.77    4.40
   3  11   1    5.14    4.40
   3  11  -1  127.68    6.60
   4  11   1    3.61    4.50
   4  11  -1    5.76    4.60
   6  11   1   57.69    6.10
   6  11  -1  104.55    6.30
   9  11   1   42.69    5.30
   0  12   1    8.81    5.40
   1  12   1   72.60    6.40
   1  12  -1  117.80    7.30
   2  12   1   -1.61    5.00
   2  12  -1   55.06    6.10
   3  12   1    6.47    4.90
   3  12  -1    3.81    5.00
   4  12   1    7.29    4.80
   4  12  -1   39.90    5.50
   5  12   1  127.73    7.10
   6  12   1  129.30    7.10
   6  12  -1  158.92    7.70
   7  12   1  148.02    7.30
   7  12  -1  110.42    6.70
   8  12   1   34.87    5.30
   8  12  -1   42.91    5.50
   0  13   1    9.98    5.00
   1  13  -1    7.17    5.40
   2  13   1    6.13    5.20
   2  13  -1    9.32    5.30
   3  13   1   13.03    5.10
   4  13  -1   12.16    5.10
   5  13   1   21.97    5.40
   0  14   1    2.09    6.60
   1  14   1   55.45    7.00
   1  14  -1  132.41    8.10
   2  14   1   49.93    7.00
   2  14  -1   28.49    6.70
   3  14   1    8.98    6.20
   0   0   2 4436.11   68.80
   1   0   2 2492.42   40.80
   1   0  -2 3568.92   56.80
   2   0   2 3496.23   57.10
   2   0  -2 1646.95   29.20
   3   0   2 8119.93  130.40
   3   0  -2  796.73   16.80
   4   0   2  475.51    8.80
   4   0  -2 4524.46   75.30
   5   0   2  505.17    9.70
   5   0  -2    1.59    3.30
   6   0   2 1784.06   29.30
   6   0  -2  805.70   14.60
   7   0   2  164.41    5.10
   7   0  -2  587.73   11.50
   8   0   2   16.07    2.60
   8   0  -2  790.06   14.70
   9   0   2    0.62    2.50
   9   0  -2   35.73    3.10
  10   0   2   26.17    3.30
  10   0  -2   41.04    3.50
  11   0   2    9.06    3.20
  11   0  -2    1.85    3.00
  12   0  -2   28.10    3.80
  13   0   2   71.60    4.80
  13   0  -2  113.68    5.60
  14   0  -2  751.77   16.20
   0   1   2   13.97    1.00
   1   1   2   72.91    2.20
   1   1  -2  333.31    7.00
   2   1   2    4.88    2.00
   2   1  -2 2603.71   43.80
   3   1   2  435.40    8.20
   3   1  -2  176.54    5.70
   4   1   2  325.80    6.60
   4   1  -2  297.12    7.90
   5   1   2  399.29    8.20
   5   1  -2  663.80   15.10
   6   1   2   38.51    3.00
   6   1  -2   17.94    2.60
   7   1   2 1234.54   21.30
   7   1  -2  276.55    6.80
   8   1   2  260.20    6.70
   8   1  -2   21.11    2.70
   9   1   2  146.71    5.10
   9   1  -2    0.94    2.50
  10   1   2  530.78   11.50
  10   1  -2    3.74    2.80
  11   1   2   50.20    4.00
  11   1  -2   41.39    3.80
  12   1   2   76.48    4.70
  13   1  -2   46.12    4.30
   0   2   2 1013.13   19.70
   1   2   2  224.16    5.40
   1   2  -2 2781.64   47.20
   2   2   2  342.20    6.90
   2   2  -2 1830.19   32.60
   3   2   2 1634.42   26.20
   3   2  -2 1198.36   22.60
   4   2   2 1007.07   17.10
   4   2  -2  334.52    8.90
   5   2   2  859.62   15.40
   5   2  -2    1.16    2.50
   6   2   2  376.11    8.30
   6   2  -2  105.04    4.10
   7   2   2   93.52    4.10
   7   2  -2  111.51    4.30
   8   2   2   29.54    3.00
   8   2  -2   57.80    3.50
   9   2   2    3.55    2.70
   9   2  -2  289.91    7.40
  10   2   2    4.66    2.90
  10   2  -2   33.15    3.40
  13   2  -2  242.30    7.90
  14   2  -2   95.95    5.50
   0   3   2   -3.80    2.30
   1   3   2   15.94    2.00
   1   3  -2  944.34   18.70
   2   3   2  591.47   10.80
   2   3  -2    3.95    2.50
   3   3   2    2.04    2.10
   3   3  -2  182.51    6.50
   4   3   2   87.60    3.80
   4   3  -2   75.86    4.90
   5   3   2  305.24    7.20
   5   3  -2    2.10    2.40
   6   3   2  233.62    6.30
   6   3  -2   22.39    3.10
   7   3   2  188.25    5.60
   7   3  -2  403.57    8.80
   8   3   2   18.76    2.90
   8   3  -2  356.63    8.30
   9   3   2    2.81    2.90
   9   3  -2    0.33    2.70
  10   3   2   18.85    3.40
  10   3  -2   65.22    4.20
  12   3   2  156.90    6.30
  13   3   2   68.38    4.80
   0   4   2   67.57    3.40
   1   4   2  593.51   11.30
   1   4  -2  281.08    7.70
   2   4   2  228.72    5.90
   2   4  -2  899.02   19.30
   3   4   2  496.12   10.10
   3   4  -2  520.80   13.30
   4   4   2 1505.07   25.40
   4   4  -2  659.77   12.70
   5   4   2  248.89    7.00
   5   4  -2  323.60    8.00
   6   4   2    9.18    2.70
   6   4  -2  918.96   16.70
   7   4   2   92.74    4.20
   7   4  -2   66.24    3.70
   8   4   2   66.46    3.90
   8   4  -2   13.12    2.90
   9   4   2   78.95    4.40
   9   4  -2   57.29    4.00
  10   4   2   11.45    3.40
  10   4  -2   35.14    3.80
  11   4  -2   40.65    4.10
  12   4  -2  161.15    6.50
  14   4  -2   56.30    4.80
   0   5   2    2.04    3.50
   1   5   2  126.18    5.20
   1   5  -2   22.41    3.60
   2   5   2    1.94    3.10
   2   5  -2    9.58    3.30
   3   5   2   86.74    4.50
   3   5  -2  182.79    5.90
   4   5   2  387.84    9.00
   4   5  -2  382.68    8.90
   5   5   2  253.41    7.00
   5   5  -2   60.48    4.10
   6   5   2   -2.33    2.80
   6   5  -2  106.61    4.50
   7   5   2  249.95    6.90
   7   5  -2    4.81    2.90
   8   5   2  395.24    9.50
   8   5  -2  122.71    5.10
   9   5   2   92.88    4.80
   9   5  -2  340.06    8.80
  10   5   2  341.68    9.20
  10   5  -2   17.12    3.60
  11   5   2   49.85    4.40
   0   6   2  229.32    6.80
   1   6   2   26.06    3.70
   1   6  -2    1.30    3.30
   2   6   2    4.27    3.40
   2   6  -2    3.88    3.50
   3   6   2    1.41    3.50
   3   6  -2  122.93    5.10
   4   6   2  159.10    5.40
   4   6  -2  308.36    7.70
   5   6   2   23.97    3.60
   5   6  -2  138.83    5.30
   6   6   2    2.63    3.00
   6   6  -2    0.59    3.00
   7   6   2    7.61    3.30
   7   6  -2  157.95    5.70
   8   6   2  223.41    7.10
   8   6  -2    3.31    3.30
   9   6   2   32.94    4.00
   9   6  -2   13.05    3.60
  11   6   2   40.95    4.30
  13   6  -2   54.80    4.90
   0   7   2    4.61    3.30
   1   7   2    6.89    3.40
   1   7  -2   59.65    4.20
   2   7   2    3.68    3.20
   2   7  -2   49.04    4.00
   3   7   2  131.66    6.00
   3   7  -2   23.81    4.20
   4   7   2    3.20    3.30
   4   7  -2    2.93    3.20
   5   7   2    9.37    3.40
   5   7  -2   45.16    4.30
   6   7   2  103.41    5.10
   6   7  -2   25.70    3.70
   7   7   2   -0.30    3.40
   7   7  -2    4.94    3.40
   8   7   2    9.95    3.60
   8   7  -2    3.11    3.40
   9   7   2   17.48    3.80
   9   7  -2   92.12    5.30
  10   7   2   50.02    4.60
  11   7   2  111.52    5.80
   0   8   2   30.25    4.30
   1   8   2    4.43    3.60
   1   8  -2  256.74    7.60
   2   8   2   30.64    4.10
   2   8  -2  383.94    9.70
   3   8   2   10.03    3.70
   3   8  -2   11.57    3.90
   4   8   2  395.66   10.00
   4   8  -2  358.79    9.40
   5   8   2  206.24    7.10
   5   8  -2   16.33    3.90
   6   8   2   91.18    5.20
   6   8  -2    2.35    3.50
   7   8   2   52.77    4.60
   7   8  -2   49.90    4.60
   9   8   2   67.25    5.00
   9   8  -2   29.29    4.30
  10   8   2   51.77    4.80
  10   8  -2   86.16    5.50
  12   8  -2  170.28    7.20
  13   8  -2   89.36    5.80
   0   9   2   51.10    4.80
   1   9   2   27.92    4.40
   1   9  -2   13.28    4.20
   2   9   2   76.22    5.30
   2   9  -2    3.20    3.90
   3   9   2   67.55    5.40
   3   9  -2    8.78    4.20
   4   9   2   20.42    5.30
   4   9  -2    6.18    4.50
   5   9   2  247.00    8.10
   5   9  -2   14.50    4.10
   6   9   2   14.45    4.10
   6   9  -2   87.97    5.60
   7   9   2   33.31    4.50
   7   9  -2   14.45    4.20
   8   9   2  247.09    8.20
   9   9   2  129.31    6.40
   9   9  -2   84.64    5.60
  12   9   2   72.83    5.50
   0  10   2   21.11    4.80
   1  10   2  123.07    6.40
   1  10  -2  292.36    9.20
   2  10   2    2.45    4.50
   2  10  -2   71.15    5.70
   3  10   2   56.99    5.50
   3  10  -2   50.16    5.20
   4  10   2    3.67    4.50
   4  10  -2   16.73    4.70
   5  10   2   74.90    5.60
   5  10  -2   59.97    5.50
   6  10   2    4.91    4.20
   6  10  -2  102.80    6.00
   7  10   2   25.19    4.60
   7  10  -2   16.94    4.50
   9  10   2   41.80    5.00
   9  10  -2   31.22    4.90
   0  11   2    0.00    4.60
   1  11   2   -3.99    4.40
   1  11  -2   13.04    4.80
   2  11   2   43.55    5.30
   2  11  -2   13.45    4.80
   3  11   2    7.96    4.50
   3  11  -2   18.90    4.60
   4  11   2   11.26    4.80
   4  11  -2    1.67    4.60
   5  11   2    9.23    5.00
   7  11   2   67.51    5.70
   7  11  -2   68.15    5.70
   8  11   2  102.14    6.30
   9  11   2   60.27    5.60
   0  12   2  292.72   10.00
   1  12   2   46.51    6.00
   1  12  -2   -6.03    5.00
   2  12   2    3.78    5.10
   2  12  -2   13.35    5.30
   3  12   2    7.73    4.90
   3  12  -2   94.68    6.50
   5  12   2   56.02    5.90
   5  12  -2   22.86    5.40
   6  12   2   94.82    6.50
   8  12   2   86.01    6.30
   8  12  -2   59.30    5.80
   0  13   2    9.11    5.40
   1  13   2   12.22    5.10
   1  13  -2    1.59    5.20
   2  13   2   26.23    5.50
   2  13  -2   13.07    5.30
   5  13   2   30.02    5.60
   6  13   2   31.44    6.00
   1  14   2   40.86    6.80
   1  14  -2   12.95    6.30
   2  14   2   12.62    6.50
   2  14  -2   16.90    6.50
   4  14   2   44.33    6.80
   4  15   2   24.58    6.50
   0   1   3  645.23   11.40
   1   1   3 1424.47   24.40
   1   1  -3  716.09   12.00
   2   1   3  716.62   12.30
   2   1  -3 1664.45   29.90
   3   1   3    6.50    2.10
   3   1  -3   77.66    3.90
   4   1   3    3.87    1.70
   4   1  -3  144.78    5.10
   5   1   3  609.91   11.40
   5   1  -3  804.43   17.50
   6   1   3  248.09    6.30
   6   1  -3  669.51   12.60
   7   1   3   88.88    3.80
   7   1  -3  374.72    8.30
   8   1   3  279.01    7.00
   8   1  -3  276.38    6.90
   9   1   3   10.08    2.70
   9   1  -3    1.77    2.50
  10   1   3   15.50    3.10
  10   1  -3   16.75    3.10
  11   1   3    3.72    3.10
  11   1  -3   -0.87    2.90
  12   1   3   66.74    4.60
  12   1  -3  185.38    6.70
  13   1   3  291.98    8.70
  14   1   3  239.33    8.10
   0   2   3  324.85    7.80
   1   2   3   34.36    2.80
   1   2  -3 1408.04   26.40
   2   2   3 7315.68  118.70
   2   2  -3   60.09    3.80
   3   2   3  430.11    8.20
   3   2  -3  340.95    8.70
   4   2   3 1756.03   28.40
   4   2  -3    2.88    2.70
   5   2   3  338.34    7.60
   5   2  -3  523.30   10.30
   6   2   3   10.22    2.80
   6   2  -3   36.60    3.10
   7   2   3  244.82    6.40
   7   2  -3  349.92    8.00
   8   2   3   98.90    4.20
   8   2  -3    6.25    2.50
   9   2   3   64.48    3.80
   9   2  -3  400.23    9.20
  10   2   3   92.50    4.60
  10   2  -3   18.30    3.20
  12   2   3   62.38    4.50
  12   2  -3  171.75    6.50
  13   2   3  124.91    5.90
  13   2  -3  187.30    7.00
  15   2  -3  125.30    6.20
   0   3   3   75.24    2.90
   1   3   3    7.50    1.90
   1   3  -3 2161.03   39.10
   2   3   3 1013.15   17.10
   2   3  -3  509.16   11.80
   3   3   3   63.42    3.20
   3   3  -3   47.89    4.50
   4   3   3  358.77    7.80
   4   3  -3 1154.92   23.60
   5   3   3    7.19    2.60
   5   3  -3   15.79    2.70
   6   3   3   91.95    4.20
   6   3  -3   49.63    3.50
   7   3   3   31.96    3.00
   7   3  -3  260.77    6.60
   8   3   3  184.13    5.70
   8   3  -3    4.91    2.60
   9   3   3  161.96    5.70
   9   3  -3  251.65    7.00
  10   3   3   15.76    3.40
  10   3  -3   21.97    3.40
  11   3   3  281.36    8.10
  11   3  -3  107.92    5.20
  12   3   3   89.31    5.10
  12   3  -3  108.43    5.40
  13   3   3   46.23    4.40
  16   3   3   60.31    5.00
   0   4   3  221.37    5.70
   1   4   3 1564.97   25.90
   1   4  -3  288.58    7.80
   2   4   3  163.20    5.00
   2   4  -3  331.23    9.80
   3   4   3   11.80    3.00
   3   4  -3    0.46    2.70
   4   4   3  132.62    4.80
   4   4  -3   11.63    2.90
   5   4   3  142.46    5.50
   5   4  -3    2.19    3.60
   6   4   3  118.49    4.50
   6   4  -3   45.81    3.40
   7   4   3   39.60    3.30
   7   4  -3   -1.46    2.50
   8   4   3  170.94    5.70
   8   4  -3   22.07    3.10
   9   4   3    4.25    3.10
   9   4  -3    3.06    3.00
  10   4   3    6.35    3.30
  10   4  -3  133.17    5.50
  11   4  -3  319.54    8.90
  12   4   3  112.05    5.60
  12   4  -3  153.88    6.40
   0   5   3  565.41   11.60
   1   5   3   26.30    3.50
   1   5  -3   -3.77    3.20
   2   5   3  151.96    5.30
   2   5  -3   10.39    3.10
   3   5   3  209.10    6.50
   3   5  -3  211.93    6.40
   4   5   3  107.66    5.00
   4   5  -3    3.39    3.50
   5   5   3  170.96    5.50
   5   5  -3    9.05    3.40
   6   5   3   53.37    3.70
   6   5  -3   -0.44    2.70
   7   5   3  174.18    5.80
   7   5  -3   57.68    3.80
   8   5   3   19.62    3.30
   8   5  -3   78.57    4.30
   9   5   3   31.88    3.70
   9   5  -3    7.49    3.20
  11   5   3   46.51    4.30
  11   5  -3   29.52    4.00
  12   5   3  190.84    7.10
  15   5   3   63.66    5.30
   0   6   3 1539.52   26.50
   1   6   3  275.84    7.50
   1   6  -3    1.92    3.40
   2   6   3  204.96    6.40
   2   6  -3    9.63    3.40
   3   6   3  903.14   16.90
   3   6  -3    6.01    3.80
   4   6   3  364.65    8.60
   4   6  -3    7.58    2.90
   5   6   3  196.06    6.30
   5   6  -3  243.05    6.90
   6   6   3   27.76    3.40
   6   6  -3    6.68    3.10
   7   6   3   44.86    3.90
   7   6  -3   91.73    4.60
   8   6   3    0.28    3.30
   8   6  -3    0.21    3.20
   9   6   3   15.06    3.60
  10   6   3  182.98    6.80
  10   6  -3  134.92    5.90
  11   6   3   40.66    4.30
  11   6  -3  528.59   12.50
  12   6  -3   69.85    5.10
   0   7   3    2.08    3.30
   1   7   3  484.51   10.80
   1   7  -3   14.59    3.50
   2   7   3   51.93    4.00
   2   7  -3  408.36    9.60
   3   7   3   18.44    3.90
   3   7  -3    4.15    4.00
   4   7   3  820.21   15.90
   4   7  -3   13.60    3.50
   5   7   3    7.16    3.30
   5   7  -3    3.62    3.60
   6   7   3   59.71    4.40
   6   7  -3   44.92    4.10
   7   7   3   28.55    3.90
   7   7  -3    5.15    3.50
   8   7   3   24.68    4.00
   8   7  -3   71.46    4.80
   9   7   3  244.47    7.80
   9   7  -3   24.24    4.00
  10   7   3  233.43    7.80
  10   7  -3  100.04    5.50
  11   7  -3   49.12    4.70
   0   8   3   43.43    4.20
   1   8   3    4.25    3.50
   1   8  -3  372.65    9.40
   2   8   3  608.34   13.20
   2   8  -3  107.33    5.80
   3   8   3   28.83    4.10
   3   8  -3    4.12    3.80
   4   8   3   14.03    4.00
   4   8  -3   58.82    4.80
   5   8   3  137.38    6.00
   5   8  -3   51.87    4.50
   6   8   3   16.79    3.90
   6   8  -3   -0.21    3.50
   7   8   3   23.48    4.10
   7   8  -3    1.47    3.70
   9   8   3   82.34    5.30
   9   8  -3   24.81    4.30
  10   8  -3  145.25    6.50
  13   8  -3   57.51    5.20
   0   9   3    3.25    4.00
   1   9   3    6.82    4.00
   1   9  -3   87.21    5.40
   2   9   3   61.42    5.00
   2   9  -3   17.21    4.20
   3   9   3   30.72    4.80
   3   9  -3   17.30    4.40
   4   9   3   62.44    5.10
   4   9  -3   -0.64    4.50
   5   9   3   62.43    5.00
   5   9  -3   11.39    4.20
   6   9   3    9.34    4.10
   6   9  -3   15.84    4.30
   7   9  -3   71.36    5.30
   8   9   3   32.11    4.40
   8   9  -3   46.28    4.80
   9   9   3  179.97    7.30
  10   9   3   60.94    5.20
  11   9  -3   46.24    4.90
   0  10   3   57.22    5.30
   1  10   3  184.44    7.40
   1  10  -3    4.67    4.50
   2  10   3  147.81    6.70
   2  10  -3  203.85    7.80
   3  10   3    4.64    4.70
   3  10  -3    4.51    4.50
   4  10   3    2.16    4.40
   4  10  -3    6.17    4.60
   5  10   3   99.45    5.90
   5  10  -3   12.57    4.60
   6  10   3  181.74    7.40
   6  10  -3   45.68    5.00
   7  10  -3   30.05    4.70
   8  10  -3   52.48    5.10
   9  10  -3  179.95    7.60
  10  10  -3   39.43    5.00
   0  11   3    2.09    4.60
   1  11   3   19.01    4.90
   1  11  -3   40.45    5.30
   2  11   3   28.23    5.10
   2  11  -3   -3.43    4.50
   3  11   3   40.01    5.10
   3  11  -3    9.43    4.60
   4  11   3   18.34    5.10
   4  11  -3   34.22    5.20
   5  11   3   15.11    4.80
   6  11   3   95.29    6.30
   6  11  -3   22.68    4.80
   7  11   3   68.90    5.70
   7  11  -3   36.37    5.10
   8  11   3  101.18    6.30
   0  12   3   18.97    5.50
   1  12   3   27.38    5.50
   1  12  -3    6.92    5.20
   2  12   3    1.23    5.00
   2  12  -3   31.05    5.60
   3  12   3   11.08    4.90
   3  12  -3   49.19    5.60
   4  12   3   42.40    5.70
   4  12  -3   16.64    5.10
   5  12   3   26.64    5.60
   6  12   3   25.60    5.10
   7  12   3   21.62    5.00
   7  12  -3   81.79    6.20
   8  12  -3   68.66    6.00
   0  13   3    3.86    5.20
   1  13   3    6.10    5.10
   1  13  -3   13.75    5.30
   2  13   3    6.40    5.10
   3  13  -3    9.79    5.10
   4  13   3    4.47    5.00
   0  14   3   74.75    7.30
   1  14   3   29.77    6.60
   1  14  -3   51.44    7.00
   2  14   3   21.84    6.70
   2  14  -3    9.28    6.50
   4  14   3   29.36    6.70
   4  15   3   10.89    6.40
   5  15   3   15.74    6.60
   6  15   3   49.02    6.30
   0   0   4  100.12    3.30
   1   0   4  520.12   10.50
   1   0  -4 3944.18   64.60
   2   0   4  756.18   14.90
   2   0  -4  235.42    7.20
   3   0   4 2739.04   45.80
   3   0  -4 2499.07   44.10
   4   0   4  375.00    7.40
   4   0  -4  242.47    8.00
   5   0   4 1400.94   23.30
   5   0  -4   32.17    4.20
   6   0   4  303.32    7.10
   6   0  -4  381.16    8.20
   7   0   4  984.18   17.50
   7   0  -4    7.61    2.50
   8   0   4  169.66    5.30
   8   0  -4 1385.39   23.70
   9   0   4  176.67    5.70
   9   0  -4  199.79    5.90
  10   0   4    9.69    3.00
  10   0  -4  336.61    8.50
  11   0   4   -0.22    3.10
  11   0  -4  226.58    7.00
  12   0   4   65.17    4.50
  13   0  -4  340.73    9.50
  14   0   4  291.82    8.90
  14   0  -4  130.53    6.10
  17   0   4  129.39    6.30
   0   1   4  724.95   13.20
   1   1   4 2724.44   44.60
   1   1  -4   22.05    2.80
   2   1   4  340.99    6.70
   2   1  -4  732.71   14.60
   3   1   4  588.10   10.40
   3   1  -4  689.63   14.20
   4   1   4  471.72    8.90
   4   1  -4  403.57   10.00
   5   1   4   38.59    2.80
   5   1  -4  434.33   11.20
   6   1   4  131.97    4.50
   6   1  -4   42.68    3.10
   7   1   4   35.29    2.90
   7   1  -4  133.17    4.50
   8   1   4   -0.81    2.40
   8   1  -4    8.63    2.50
   9   1   4  168.51    5.50
   9   1  -4   50.35    3.40
  10   1   4    7.53    3.00
  10   1  -4   81.94    4.30
  11   1  -4   83.87    4.60
  12   1   4   36.43    4.00
  12   1  -4   76.70    4.70
  13   1  -4   53.09    4.50
   0   2   4  172.96    5.40
   1   2   4  427.44    8.20
   1   2  -4   36.22    3.60
   2   2   4  636.41   11.20
   2   2  -4   33.81    3.70
   3   2   4   24.74    2.10
   3   2  -4  154.94    5.40
   4   2   4   60.71    3.10
   4   2  -4  248.48    7.60
   5   2   4  648.74   12.20
   5   2  -4   12.85    2.60
   6   2   4    3.04    3.10
   6   2  -4    3.05    2.70
   7   2   4    0.14    2.30
   7   2  -4  456.83    9.60
   8   2   4   75.43    3.80
   8   2  -4   31.83    3.00
   9   2   4   60.50    3.80
   9   2  -4   31.85    3.20
  10   2   4    9.33    3.10
  10   2  -4  127.21    5.10
  11   2   4   28.32    3.70
  13   2   4   53.28    4.60
  14   2  -4   76.04    5.10
  16   2   4   80.07    5.40
   0   3   4   58.60    2.90
   1   3   4  255.42    5.70
   1   3  -4   43.08    3.00
   2   3   4   69.97    3.00
   2   3  -4    5.57    2.80
   3   3   4  416.31    8.50
   3   3  -4    1.22    3.20
   4   3   4   24.65    2.90
   4   3  -4  426.23    8.80
   5   3   4   45.51    3.20
   5   3  -4  507.28   10.20
   6   3   4  407.89    8.90
   6   3  -4  258.61    6.70
   7   3   4   38.61    3.20
   7   3  -4   26.24    2.90
   8   3   4    1.18    2.60
   8   3  -4   -0.41    2.50
   9   3   4  239.05    6.90
   9   3  -4    4.82    2.90
  10   3   4  206.57    6.70
  10   3  -4   52.31    4.00
  11   3  -4   66.13    4.50
  12   3   4  100.27    5.30
  12   3  -4   77.88    4.90
  14   3   4   99.16    5.60
  15   3   4   58.36    4.90
   0   4   4    5.86    2.30
   1   4   4  904.27   16.00
   1   4  -4 1217.04   23.00
   2   4   4   27.04    2.90
   2   4  -4   -0.56    3.40
   3   4   4  657.12   12.60
   3   4  -4  180.39    5.50
   4   4   4   68.15    3.80
   4   4  -4   20.83    3.10
   5   4   4  484.78   10.40
   5   4  -4   37.43    4.00
   6   4   4   14.19    2.80
   6   4  -4   24.84    2.90
   7   4   4  125.91    4.70
   7   4  -4   37.11    3.20
   8   4   4   15.87    3.00
   8   4  -4  122.68    4.80
   9   4   4  288.56    7.90
   9   4  -4   -0.55    2.80
  10   4   4   42.94    4.00
  10   4  -4  289.37    8.10
  11   4   4   63.38    4.50
  11   4  -4   58.02    4.40
  12   4   4  121.66    5.80
  12   4  -4  209.40    7.30
  13   4  -4   55.18    4.70
   0   5   4  454.95    9.90
   1   5   4  224.52    6.50
   1   5  -4   52.50    3.90
   2   5   4   15.72    3.20
   2   5  -4   40.06    3.50
   3   5   4  642.85   12.80
   3   5  -4  477.37   10.40
   4   5   4  575.59   11.80
   4   5  -4    7.13    3.60
   5   5   4  182.58    5.70
   5   5  -4  262.23    7.20
   6   5   4    1.11    2.80
   6   5  -4  308.96    7.70
   7   5   4   86.92    4.30
   7   5  -4   26.36    3.30
   8   5   4   47.32    3.90
   8   5  -4   42.26    3.70
   9   5   4   10.86    3.30
   9   5  -4   45.61    3.90
  10   5   4   82.08    4.90
  10   5  -4  192.33    6.70
  11   5   4  543.14   12.60
  13   5   4   55.85    4.80
  15   5   4   61.19    5.30
   0   6   4   22.71    3.50
   1   6   4    0.82    3.20
   1   6  -4   98.72    4.90
   2   6   4  128.26    5.40
   2   6  -4   42.56    3.80
   3   6   4   30.89    4.00
   3   6  -4   77.81    4.70
   4   6   4   15.83    3.30
   4   6  -4    4.43    2.90
   5   6   4   85.89    4.60
   5   6  -4   -1.08    3.10
   6   6   4   10.50    3.10
   6   6  -4   18.64    3.30
   7   6   4   16.07    3.40
   7   6  -4  244.86    7.10
   8   6   4    1.45    3.30
   8   6  -4   15.00    3.50
  10   6   4   33.48    4.10
  10   6  -4  180.16    6.70
  11   6   4   68.22    4.90
  15   6   4   59.56    5.20
   0   7   4   13.44    3.50
   1   7   4   39.31    4.00
   1   7  -4    6.78    3.40
   2   7   4   38.65    4.10
   2   7  -4   10.83    3.70
   3   7   4    1.26    3.60
   3   7  -4    3.80    4.00
   4   7   4   13.21    3.60
   4   7  -4   82.03    4.60
   5   7   4   45.59    4.00
   5   7  -4   15.79    3.80
   6   7   4   18.78    3.70
   6   7  -4   98.38    5.00
   7   7   4   55.21    4.40
   7   7  -4  110.02    5.30
   8   7   4    4.40    3.70
   8   7  -4    6.67    3.60
  10   7   4   93.91    5.40
  11   7   4  101.64    5.70
   0   8   4   11.32    3.70
   1   8   4  389.15    9.80
   1   8  -4  113.22    5.40
   2   8   4   39.51    4.80
   2   8  -4  123.62    5.80
   3   8   4  101.43    5.40
   3   8  -4  113.17    5.70
   4   8   4   56.70    4.90
   4   8  -4    3.13    3.70
   5   8   4  124.82    5.80
   5   8  -4    2.63    3.70
   6   8   4   35.14    4.30
   6   8  -4  143.76    6.10
   7   8   4   65.01    4.80
   7   8  -4   39.47    4.40
   9   8   4   49.06    4.70
   9   8  -4  177.35    7.00
  10   8   4  187.90    7.30
  10   8  -4  246.76    8.30
  11   8   4  117.67    6.20
  12   8  -4   56.27    5.20
  15   8   4  101.16    5.80
   0   9   4   17.30    4.20
   1   9   4   70.82    5.10
   1   9  -4    5.40    4.00
   2   9   4    9.74    4.20
   2   9  -4    6.76    4.00
   3   9   4   33.35    4.90
   3   9  -4    5.25    4.20
   4   9   4  115.59    6.00
   4   9  -4   17.01    4.90
   5   9   4   56.57    4.90
   5   9  -4   15.33    4.20
   6   9   4    1.03    4.00
   6   9  -4    0.70    4.00
   7   9   4   14.45    4.10
   9   9   4   45.64    4.80
  11   9   4   68.02    5.40
   0  10   4   34.23    5.00
   1  10   4   26.34    4.90
   1  10  -4    8.49    4.60
   2  10   4   13.87    4.50
   2  10  -4    7.20    4.70
   3  10   4   38.07    5.20
   3  10  -4   17.03    4.70
   4  10   4   24.31    4.80
   4  10  -4   18.03    4.70
   5  10   4   19.68    4.50
   5  10  -4   44.06    4.90
   6  10   4   24.54    4.50
   6  10  -4   63.31    5.30
   7  10   4   58.76    5.20
   8  10  -4  100.79    6.10
   9  10   4   64.36    5.40
   9  10  -4  201.53    7.90
  12  10   4   53.12    5.40
  14  10   4   56.36    5.20
   0  11   4   29.69    5.10
   1  11   4    3.01    4.60
   1  11  -4    1.43    4.60
   2  11   4    3.93    4.40
   2  11  -4   10.08    4.80
   3  11   4   57.19    5.50
   4  11   4    3.33    5.10
   4  11  -4    4.54    4.80
   5  11   4   97.73    6.30
   5  11  -4   15.53    5.40
   6  11   4  146.02    7.00
   6  11  -4   20.87    4.80
   8  11   4   35.19    5.10
   8  11  -4   42.47    5.30
  10  11  -4   49.83    5.50
   0  12   4   59.42    6.10
   1  12   4   85.07    6.50
   1  12  -4   62.95    6.10
   2  12   4   20.50    5.40
   2  12  -4    2.08    5.10
   3  12   4   33.56    5.40
   3  12  -4   73.02    6.10
   4  12   4   15.27    5.20
   6  12   4   39.89    5.40
   7  12   4  134.99    7.10
   7  12  -4   35.77    5.30
   8  12  -4  179.61    8.00
   0  13   4    6.33    5.10
   1  13   4   17.93    5.30
   1  13  -4   26.79    5.50
   2  13  -4    4.77    5.00
   3  13  -4    6.94    5.00
   4  13   4   22.67    5.40
   5  13   4   27.72    5.60
   5  13  -4   60.49    6.20
   6  13   4   23.32    5.50
   7  13   4  102.85    7.20
   0  14   4   11.68    6.40
   1  14   4    4.49    6.30
   1  14  -4   42.76    6.90
   2  14   4   12.15    6.60
   5  14   4   53.77    6.10
   6  14   4   30.79    5.30
   6  15   4   24.98    6.00
   7  15   4   13.39    5.80
   0   1   5  137.22    3.80
   1   1   5 2325.26   39.00
   1   1  -5   12.74    2.90
   2   1   5  664.16   11.50
   2   1  -5 2219.26   38.90
   3   1   5  119.78    3.40
   3   1  -5 1231.74   23.10
   4   1   5    8.97    2.10
   4   1  -5  315.71    8.50
   5   1   5    2.22    2.30
   5   1  -5  420.17    8.60
   6   1   5   82.58    3.70
   6   1  -5    1.02    2.40
   7   1   5  108.55    4.20
   7   1  -5   84.08    3.70
   8   1   5  300.85    7.40
   8   1  -5  197.49    5.70
   9   1   5   62.71    3.80
   9   1  -5  389.33    9.00
  10   1   5  194.49    6.30
  10   1  -5  291.54    7.80
  11   1   5  168.16    6.20
  11   1  -5  296.63    8.30
  12   1  -5   63.99    4.50
  13   1   5  121.88    5.80
  14   1   5  107.54    5.70
  14   1  -5   90.26    5.40
  15   1  -5  139.88    6.50
   0   2   5 1500.15   27.60
   1   2   5  122.09    3.70
   1   2  -5 1686.17   31.00
   2   2   5    5.57    1.70
   2   2  -5 3856.51   64.60
   3   2   5 1495.29   24.30
   3   2  -5  101.59    4.40
   4   2   5  591.85   11.10
   4   2  -5  300.13    8.60
   5   2   5  111.83    4.10
   5   2  -5 1110.01   19.10
   6   2   5 2039.26   33.40
   6   2  -5  135.01    5.00
   7   2   5  198.27    5.60
   7   2  -5   45.51    3.20
   8   2   5  773.62   14.70
   8   2  -5    9.04    2.60
   9   2   5  133.48    5.10
   9   2  -5  432.09    9.70
  10   2   5    0.65    2.90
  10   2  -5    2.21    2.90
  11   2  -5   20.99    3.50
  12   2   5   72.18    4.70
  12   2  -5  240.68    7.70
  13   2   5   47.20    4.40
   0   3   5  300.63    6.40
   1   3   5   34.51    2.30
   1   3  -5  800.07   15.60
   2   3   5   97.51    3.50
   2   3  -5    4.85    2.80
   3   3   5  340.01    7.40
   3   3  -5   43.23    4.20
   4   3   5   75.79    3.70
   4   3  -5  527.34   10.50
   5   3   5   11.35    2.70
   5   3  -5    4.51    2.50
   6   3   5    9.76    2.60
   6   3  -5    0.86    2.60
   7   3   5   58.82    3.50
   7   3  -5   13.62    2.70
   8   3   5   -2.14    2.60
   8   3  -5  138.71    5.00
   9   3   5   14.92    3.20
   9   3  -5  187.29    6.00
  10   3   5    7.52    3.20
  10   3  -5  171.87    6.10
  12   3   5  218.52    7.40
  12   3  -5   48.47    4.30
  13   3  -5  237.96    7.90
   0   4   5  529.71   10.50
   1   4   5  277.99    6.70
   1   4  -5   53.31    4.10
   2   4   5  185.03    5.40
   2   4  -5  217.42    7.70
   3   4   5  115.74    4.50
   3   4  -5  514.32   10.40
   4   4   5  483.45   10.10
   4   4  -5  781.27   14.50
   5   4   5  383.02    8.90
   5   4  -5   34.08    3.90
   6   4   5  207.21    5.90
   6   4  -5  634.01   12.40
   7   4   5    7.70    2.70
   7   4  -5   46.28    3.40
   8   4   5   45.84    3.60
   8   4  -5  109.10    4.60
   9   4   5  318.48    8.40
   9   4  -5    1.71    3.00
  10   4  -5  132.80    5.50
  11   4  -5  118.19    5.60
  12   4   5   42.89    4.30
  13   4   5   68.76    5.00
  13   4  -5   56.29    4.70
  16   4   5  101.51    5.80
  17   4   5  112.82    5.80
   0   5   5   78.14    4.20
   1   5   5    1.58    3.00
   1   5  -5   75.03    4.10
   2   5   5   11.20    3.30
   2   5  -5    6.45    3.20
   3   5   5   64.25    4.30
   3   5  -5    3.09    3.60
   4   5   5   38.68    3.80
   4   5  -5   -2.36    3.30
   5   5   5    8.05    3.00
   5   5  -5   -0.76    3.40
   6   5   5   23.03    3.10
   6   5  -5    0.14    2.70
   7   5   5    0.12    2.80
   7   5  -5    3.37    2.90
   8   5   5  119.74    5.10
   8   5  -5   33.45    3.50
   9   5   5   63.02    4.30
   9   5  -5   -0.97    3.10
  10   5   5  132.67    5.80
  12   5   5   44.34    4.40
  13   5  -5  137.57    6.40
   0   6   5  186.88    6.20
   1   6   5    2.18    3.30
   1   6  -5   18.88    3.50
   2   6   5  148.87    5.70
   2   6  -5   90.66    4.70
   3   6   5   65.35    4.20
   3   6  -5   71.46    4.40
   4   6   5  676.65   13.40
   4   6  -5  660.99   13.10
   5   6   5  172.59    5.90
   5   6  -5  293.33    7.70
   6   6   5  223.82    6.70
   6   6  -5    1.97    3.00
   7   6   5   54.64    4.10
   7   6  -5    2.15    3.10
   8   6   5   42.18    4.00
   8   6  -5    4.41    3.30
   9   6   5  257.40    7.90
   9   6  -5   13.77    3.70
  10   6   5  159.99    6.40
  10   6  -5  111.09    5.50
  11   6   5  113.06    5.70
  11   6  -5  332.36    9.40
  14   6  -5  124.60    6.30
  16   6   5   57.31    5.00
   0   7   5   24.31    3.70
   1   7   5   35.36    3.80
   1   7  -5   19.72    3.60
   2   7   5    9.62    3.90
   2   7  -5   32.77    4.20
   3   7   5   48.44    4.10
   3   7  -5   45.07    4.00
   4   7   5    2.34    3.50
   4   7  -5  231.99    7.00
   5   7   5  141.38    5.70
   5   7  -5    4.64    3.40
   6   7   5   12.51    3.60
   6   7  -5    3.33    3.40
   7   7   5  207.23    6.90
   7   7  -5   31.42    3.90
   8   7   5   87.04    5.10
   8   7  -5   54.69    4.50
   9   7   5   42.47    4.40
  10   7   5   70.20    5.00
  12   7   5  329.56    9.70
  12   7  -5   81.44    5.40
   0   8   5   25.16    4.30
   1   8   5   55.11    4.90
   1   8  -5   62.29    5.10
   2   8   5   95.52    5.20
   2   8  -5   68.32    4.80
   3   8   5  170.27    6.70
   3   8  -5    8.56    4.50
   4   8   5   31.03    4.40
   4   8  -5   31.54    4.20
   5   8   5    1.10    3.70
   5   8  -5   64.52    4.80
   6   8   5   55.48    4.60
   6   8  -5   -4.11    3.40
   7   8   5   18.01    4.00
   7   8  -5   16.35    4.00
   8   8   5  185.69    7.00
   9   8  -5   36.14    4.40
  10   8  -5  116.77    6.10
  11   8   5  103.07    5.90
   0   9   5   10.69    4.10
   1   9   5   74.42    5.20
   1   9  -5   61.40    5.00
   2   9   5    1.51    4.10
   2   9  -5   20.32    4.40
   3   9   5   20.29    4.90
   3   9  -5   84.98    5.60
   4   9   5    8.96    4.20
   4   9  -5   19.28    5.00
   5   9   5   31.21    4.50
   5   9  -5   69.33    5.20
   6   9   5  193.44    7.30
   6   9  -5   67.34    5.20
   7   9   5  192.13    7.30
   7   9  -5   79.58    5.40
   8   9   5   24.12    4.30
   9   9   5   46.89    4.80
   9   9  -5   31.75    4.60
  11   9   5  119.62    6.40
  12   9   5  107.36    6.20
  13   9   5   88.58    5.80
   0  10   5   55.02    5.40
   1  10   5  116.69    6.20
   1  10  -5   85.09    5.90
   2  10   5  279.37    9.00
   2  10  -5  231.00    8.20
   3  10   5   89.77    6.00
   3  10  -5   28.23    5.00
   4  10   5   63.17    5.20
   4  10  -5   90.40    5.80
   5  10  -5   25.04    4.60
   6  10   5   83.56    5.70
   8  10   5   48.49    5.10
   8  10  -5   50.86    5.10
   9  10  -5   64.27    5.50
  11  10   5   49.43    5.20
  12  10   5   64.12    5.70
   0  11   5  105.20    6.40
   1  11   5   33.69    5.20
   1  11  -5   28.67    5.10
   2  11   5    2.50    4.40
   2  11  -5    8.16    4.50
   3  11   5   18.28    4.90
   3  11  -5    8.25    4.60
   4  11   5   42.12    5.80
   4  11  -5   11.96    5.00
   5  11   5   15.47    4.60
   5  11  -5   13.03    5.30
   8  11   5   75.20    5.80
   0  12   5  171.00    7.90
   1  12   5  174.07    7.90
   1  12  -5  158.57    7.70
   2  12   5   68.07    6.00
   2  12  -5   27.34    5.40
   3  12   5   10.77    5.00
   3  12  -5   13.20    5.00
   4  12   5   14.69    5.40
   5  12  -5  109.07    7.00
   6  12   5   53.50    5.60
   8  12   5   34.09    5.30
   8  12  -5   49.85    5.70
   0  13   5   15.17    5.20
   1  13   5   21.38    5.30
   1  13  -5    9.66    5.10
   2  13  -5    8.93    5.10
   6  13   5   40.39    5.90
   0  14   5  179.34    9.10
   1  14   5   64.31    7.40
   1  14  -5   89.29    7.80
   2  14   5    9.27    6.10
   2  14  -5    8.86    6.40
   4  14   5   12.82    6.60
   8  14   5   39.54    5.70
   4  15   5   20.81    6.70
   5  15   5   27.52    7.40
   6  15   5   15.72    6.10
   7  15   5    3.63    5.60
   0   0   6 1099.89   18.10
   1   0   6 1657.64   30.00
   1   0  -6 3157.31   53.50
   2   0   6 3351.22   56.90
   2   0  -6 1635.47   30.50
   3   0   6  127.26    3.60
   3   0  -6  103.67    5.00
   4   0   6 1416.93   23.30
   4   0  -6  172.75    6.80
   5   0   6  141.37    4.50
   5   0  -6  256.53    6.20
   6   0   6  922.54   16.50
   6   0  -6  254.64    6.30
   7   0   6 2307.91   37.50
   7   0  -6 1781.53   29.50
   8   0   6    1.03    2.40
   8   0  -6  771.85   14.50
   9   0   6    1.24    2.70
   9   0  -6    7.08    2.70
  10   0   6    2.24    2.90
  10   0  -6  101.24    4.70
  11   0   6  106.37    5.10
  11   0  -6  103.31    5.00
  12   0  -6   72.91    4.70
  15   0   6   61.36    5.00
   0   1   6 5445.97   86.80
   1   1   6 1303.46   23.70
   1   1  -6 1626.33   29.70
   2   1   6  556.95    9.80
   2   1  -6 1637.33   30.30
   3   1   6  659.42   11.60
   3   1  -6 1036.21   20.20
   4   1   6  967.66   16.70
   4   1  -6  124.29    5.20
   5   1   6   12.99    2.50
   5   1  -6   37.76    2.80
   6   1   6  203.33    5.70
   6   1  -6   83.39    3.70
   7   1   6  169.44    5.10
   7   1  -6    6.39    2.40
   8   1   6   67.46    3.70
   8   1  -6   83.05    3.80
   9   1   6   70.18    4.00
   9   1  -6    4.00    2.60
  10   1   6   25.13    3.40
  10   1  -6   18.82    3.20
  12   1   6  173.86    6.50
  12   1  -6   73.45    4.70
  15   1   6  187.58    7.40
   0   2   6   20.53    2.40
   1   2   6  988.97   16.50
   1   2  -6    4.30    2.10
   2   2   6  201.90    4.80
   2   2  -6  255.68    7.20
   3   2   6    1.25    1.80
   3   2  -6  535.56   12.40
   4   2   6    1.11    2.40
   4   2  -6   -0.54    3.20
   5   2   6  967.94   17.10
   5   2  -6   33.07    2.90
   6   2   6  550.16   11.20
   6   2  -6  266.74    7.00
   7   2   6  270.25    6.80
   7   2  -6  596.29   11.70
   8   2   6  341.28    8.10
   8   2  -6  200.59    5.80
   9   2   6   -1.23    2.70
   9   2  -6  282.00    7.40
  10   2   6   15.33    3.20
  10   2  -6   30.91    3.50
   0   3   6  212.85    5.20
   1   3   6   16.27    2.20
   1   3  -6   86.73    3.90
   2   3   6   40.59    2.90
   2   3  -6 1079.88   21.80
   3   3   6  297.82    6.90
   3   3  -6    8.43    3.50
   4   3   6  190.57    5.50
   4   3  -6    2.81    2.50
   5   3   6    2.14    2.70
   5   3  -6   82.65    3.80
   6   3   6    2.67    2.60
   6   3  -6  269.95    6.70
   7   3   6   20.36    2.90
   7   3  -6  167.62    5.30
   8   3   6   33.93    3.30
   8   3  -6  126.76    4.80
   9   3   6  340.99    8.60
   9   3  -6  297.10    7.80
  10   3   6  214.14    6.90
  10   3  -6   11.46    3.20
  11   3   6   45.97    4.10
  15   3   6  105.92    5.90
  16   3   6   67.44    5.20
   0   4   6   83.11    3.70
   1   4   6  437.42    9.20
   1   4  -6  482.32   11.40
   2   4   6  265.63    6.70
   2   4  -6   23.58    3.10
   3   4   6  109.30    4.40
   3   4  -6   71.11    3.90
   4   4   6    8.19    3.20
   4   4  -6    9.46    2.90
   5   4   6 1067.64   18.90
   5   4  -6  915.94   16.70
   6   4   6  360.40    8.30
   6   4  -6  301.76    7.30
   7   4   6   22.01    3.00
   7   4  -6   98.45    4.30
   8   4   6  147.66    5.40
   8   4  -6  191.68    6.00
   9   4   6  134.77    5.50
   9   4  -6  350.39    8.90
  10   4   6   18.74    3.60
  10   4  -6    3.56    3.20
  15   4  -6   78.06    5.40
   0   5   6  788.68   14.90
   1   5   6  223.69    6.40
   1   5  -6   17.28    3.20
   2   5   6    6.00    3.70
   2   5  -6  262.60    7.20
   3   5   6  331.48    8.20
   3   5  -6  986.52   17.90
   4   5   6    1.15    3.30
   4   5  -6   22.09    3.50
   5   5   6   57.75    3.80
   5   5  -6  275.92    7.10
   6   5   6   16.42    3.00
   6   5  -6    3.05    2.70
   7   5   6  134.89    5.20
   7   5  -6  295.87    7.70
   8   5   6  213.81    6.70
   8   5  -6  312.08    8.20
   9   5   6   99.80    5.00
   9   5  -6   87.09    4.70
  10   5  -6   55.54    4.40
  13   5   6  196.21    7.40
  14   5   6  232.87    8.20
  14   5  -6  118.72    6.20
  17   5   6   67.42    5.10
   0   6   6    1.04    3.20
   1   6   6  104.18    5.10
   1   6  -6    1.23    3.50
   2   6   6  411.18    9.40
   2   6  -6  537.78   11.30
   3   6   6  209.14    6.20
   3   6  -6  424.30    9.50
   4   6   6  196.04    6.20
   4   6  -6  259.79    7.10
   5   6   6   17.70    3.30
   5   6  -6  221.11    6.50
   6   6   6   -2.89    2.90
   6   6  -6    7.01    3.10
   7   6   6   78.26    4.60
   7   6  -6   26.16    3.60
   8   6   6    2.17    3.30
   8   6  -6    2.38    3.20
   9   6   6   23.52    3.80
   9   6  -6   12.98    3.50
  10   6   6  176.84    6.70
  10   6  -6   29.05    4.00
  14   6   6   99.80    5.90
   0   7   6    8.96    3.60
   1   7   6   45.04    4.30
   1   7  -6    0.61    3.60
   2   7   6    1.52    3.60
   2   7  -6   15.65    4.20
   3   7   6   14.80    3.40
   3   7  -6   -3.44    3.10
   4   7   6   24.26    3.60
   4   7  -6   12.28    3.60
   5   7   6    6.42    3.50
   5   7  -6   12.44    3.40
   6   7   6    9.46    3.50
   6   7  -6   92.61    4.90
   7   7   6   58.57    4.50
   7   7  -6   73.44    4.70
   8   7   6  119.76    5.70
   8   7  -6  140.50    6.00
   9   7  -6   26.65    4.00
  11   7   6   65.55    5.00
  11   7  -6   55.79    4.80
  13   7   6   70.11    5.30
   0   8   6   88.15    5.50
   1   8   6   56.35    5.00
   1   8  -6   25.80    4.20
   2   8   6   82.58    5.10
   2   8  -6  222.27    7.30
   3   8   6  747.56   15.50
   3   8  -6  948.03   18.60
   4   8   6  129.71    5.90
   4   8  -6  683.79   14.40
   5   8   6  197.36    6.90
   5   8  -6   31.77    4.20
   6   8   6   25.60    4.10
   6   8  -6    1.30    3.60
   7   8   6   17.36    4.00
   7   8  -6   82.86    5.20
   8   8  -6   85.35    5.30
   9   8  -6  101.30    5.60
  10   8   6   80.70    5.40
  11   8   6   53.57    5.00
  14   8   6   74.68    5.40
  15   8   6   47.66    4.70
   0   9   6   93.18    5.50
   1   9   6   32.42    4.60
   1   9  -6    3.98    4.00
   2   9   6    5.43    4.30
   2   9  -6  137.56    6.40
   3   9   6   31.13    4.40
   3   9  -6  124.05    6.30
   4   9   6   -0.01    4.00
   4   9  -6   35.88    4.50
   5   9   6    1.45    4.00
   5   9  -6   28.33    4.40
   6   9   6   33.30    4.40
   6   9  -6   74.13    5.30
   7   9  -6   26.81    4.40
   8   9   6   47.61    4.80
   9   9  -6   32.67    4.60
   0  10   6    4.42    4.40
   1  10   6  146.11    6.80
   1  10  -6   52.17    5.20
   2  10   6  100.63    6.20
   2  10  -6  126.11    6.60
   3  10   6   38.38    5.30
   3  10  -6  319.39    9.70
   4  10   6    0.33    4.10
   4  10  -6   83.58    5.80
   5  10   6   10.09    4.20
   5  10  -6   55.04    5.10
   6  10   6   38.01    4.80
   7  10   6   68.16    5.40
   7  10  -6  112.54    6.30
   9  10   6   40.41    4.90
  10  10  -6   39.00    5.00
  11  10   6   88.18    6.00
  13  10   6   59.17    5.30
   0  11   6   31.34    5.00
   1  11   6   18.41    4.70
   1  11  -6   11.69    4.60
   2  11   6    2.99    4.50
   2  11  -6   68.80    5.60
   3  11   6    2.05    4.90
   3  11  -6    1.51    4.60
   4  11   6    8.73    5.30
   4  11  -6    9.08    5.10
   5  11   6   42.46    5.10
   5  11  -6   64.33    6.00
   6  11   6   32.05    5.00
   7  11   6   72.78    5.80
   8  11   6   30.18    5.00
   1  12  -6   14.00    5.20
   2  12   6   87.36    6.40
   2  12  -6  101.97    6.60
   3  12   6   75.03    6.20
   3  12  -6   11.18    5.00
   4  12   6   65.16    6.30
   5  12   6   30.15    5.10
   5  12  -6  103.06    6.90
   6  12   6   57.83    5.60
   7  12   6   34.98    5.30
   7  12  -6   72.55    6.00
   8  12  -6   30.80    5.30
  10  12   6   53.36    5.70
   0  13   6   59.28    6.00
   1  13   6   15.62    5.20
   1  13  -6   14.89    5.20
   2  13   6   19.11    5.20
   4  13   6   37.49    6.00
   4  13  -6   13.75    5.30
   5  13   6   19.76    5.70
   9  13   6   69.35    5.90
   0  14   6   25.31    6.90
   1  14   6    7.47    6.30
   1  14  -6    6.39    6.40
   5  14   6   73.86    6.20
   9  14   6   18.49    5.00
   4  15   6    6.21    6.10
   5  15   6    9.44    7.00
   0   1   7  396.38    7.70
   1   1   7    0.84    2.00
   1   1  -7 1641.93   30.30
   2   1   7  562.82   10.10
   2   1  -7   17.07    2.50
   3   1   7    2.72    1.80
   3   1  -7  206.92    6.40
   4   1   7  416.83    8.50
   4   1  -7   26.16    3.30
   5   1   7  715.64   13.30
   5   1  -7  358.76    7.80
   6   1   7   -0.09    2.40
   6   1  -7 1010.00   17.80
   7   1   7   -1.68    2.20
   7   1  -7  589.55   11.60
   8   1   7   -1.14    2.40
   8   1  -7  123.14    4.60
   9   1   7   66.39    3.90
   9   1  -7   67.39    3.90
  10   1   7  172.19    6.00
  10   1  -7   10.15    3.00
  11   1   7  512.54   11.80
  11   1  -7  124.14    5.40
  12   1   7   50.12    4.30
  13   1  -7   67.55    4.80
  14   1   7  119.11    6.00
  14   1  -7  170.32    6.90
  16   1   7  148.16    6.70
   0   2   7 3557.25   59.70
   1   2   7  689.09   12.10
   1   2  -7   81.87    4.00
   2   2   7 2781.91   49.30
   2   2  -7  125.70    4.90
   3   2   7  313.01    6.80
   3   2  -7   10.71    3.00
   4   2   7   53.73    3.30
   4   2  -7    1.56    2.50
   5   2   7  182.17    5.30
   5   2  -7    1.03    2.50
   6   2   7   16.11    3.00
   6   2  -7 2118.02   34.60
   7   2   7    0.43    2.40
   7   2  -7  163.44    5.10
   8   2   7   75.32    3.90
   8   2  -7  842.31   15.70
   9   2   7  412.74    9.60
   9   2  -7   50.57    3.60
  10   2   7    0.83    3.00
  10   2  -7  130.08    5.30
  11   2   7   59.43    4.30
  11   2  -7  274.76    8.00
  13   2  -7   83.35    5.10
   0   3   7    9.19    2.20
   1   3   7 1058.34   18.00
   1   3  -7  403.79    9.50
   2   3   7  240.71    5.90
   2   3  -7  358.49    9.80
   3   3   7  328.80    7.40
   3   3  -7   -0.08    3.20
   4   3   7  251.36    6.40
   4   3  -7  311.40    7.20
   5   3   7  109.91    4.50
   5   3  -7  347.03    8.00
   6   3   7  282.82    7.00
   6   3  -7  194.09    5.60
   7   3   7   48.14    3.40
   7   3  -7   56.01    3.50
   8   3   7  105.84    4.60
   8   3  -7  283.35    7.30
   9   3   7   33.56    3.60
   9   3  -7    2.24    2.90
  10   3   7  142.22    5.70
  10   3  -7    4.59    3.10
  11   3  -7   27.20    3.80
  12   3   7   39.11    4.20
  12   3  -7  152.66    6.30
  13   3   7  454.18   11.50
  14   3   7   66.76    5.00
  15   3  -7   74.68    5.30
  16   3   7  123.93    6.30
   0   4   7  354.26    7.90
   1   4   7   15.57    3.00
   1   4  -7 1423.69   24.00
   2   4   7   54.32    3.50
   2   4  -7  294.78    7.10
   3   4   7 1105.64   19.40
   3   4  -7    5.09    2.80
   4   4   7  543.87   11.30
   4   4  -7  174.49    5.80
   5   4   7   37.89    3.20
   5   4  -7  913.60   16.60
   6   4   7    5.88    2.70
   6   4  -7  335.56    7.90
   7   4   7  148.15    5.20
   7   4  -7   95.60    4.30
   8   4   7  497.62   11.00
   8   4  -7   85.20    4.30
   9   4   7  116.90    5.20
   9   4  -7   68.93    4.30
  10   4   7   22.46    3.70
  10   4  -7  170.90    6.30
  14   4  -7   77.58    5.30
  16   4   7   72.81    5.20
   0   5   7   30.02    3.60
   1   5   7   48.70    4.20
   1   5  -7   49.91    4.10
   2   5   7  255.07    7.10
   2   5  -7   71.05    4.40
   3   5   7   63.91    4.40
   3   5  -7   78.86    4.60
   4   5   7   84.93    4.20
   4   5  -7  265.07    7.10
   5   5   7   54.09    3.80
   5   5  -7   42.65    3.40
   6   5   7    3.28    2.80
   6   5  -7   31.45    3.30
   7   5   7    1.19    2.90
   7   5  -7  158.12    5.50
   8   5   7    1.68    3.10
   8   5  -7    2.98    3.00
   9   5   7   80.58    4.70
   9   5  -7    2.24    3.10
  10   5   7   37.18    4.10
  10   5  -7  151.57    6.10
  12   5   7  106.16    5.70
   0   6   7   30.77    3.90
   1   6   7   69.50    4.30
   1   6  -7  561.94   11.70
   2   6   7   42.26    3.90
   2   6  -7  105.00    4.90
   3   6   7  362.55    8.70
   3   6  -7    1.91    2.80
   4   6   7  342.50    8.50
   4   6  -7  603.58   12.30
   5   6   7   65.28    4.10
   5   6  -7 1037.91   19.00
   6   6   7   15.66    3.30
   6   6  -7   25.12    3.40
   7   6   7  531.83   11.80
   7   6  -7  134.66    5.50
   8   6   7  171.17    6.30
   8   6  -7  543.08   12.10
   9   6   7   51.96    4.40
   9   6  -7  267.94    8.10
  10   6   7  147.74    6.20
  10   6  -7  272.37    8.30
   0   7   7   60.10    4.80
   1   7   7    5.08    3.60
   1   7  -7   62.17    4.50
   2   7   7   65.56    4.30
   2   7  -7   43.40    4.00
   3   7   7    1.59    3.40
   3   7  -7  367.67    9.00
   4   7   7   12.88    3.40
   4   7  -7   76.56    4.70
   5   7   7    0.30    3.40
   5   7  -7   21.13    3.60
   6   7   7    2.89    3.50
   6   7  -7   40.10    4.10
   7   7   7   13.61    3.70
   7   7  -7   65.15    4.60
   9   7   7  146.87    6.30
   9   7  -7   48.49    4.50
  11   7   7   44.46    4.60
  12   7  -7   59.03    5.00
  13   7   7   57.78    5.00
  14   7   7   84.97    5.70
  15   7   7  116.58    6.10
   0   8   7    6.93    3.80
   1   8   7   42.79    4.40
   1   8  -7  196.02    6.80
   2   8   7  191.72    7.10
   2   8  -7   -0.60    4.20
   3   8   7   73.67    5.20
   3   8  -7  159.65    6.90
   4   8   7   53.51    4.60
   4   8  -7  309.02    8.60
   5   8   7   -0.18    3.60
   5   8  -7   -1.69    3.50
   6   8   7  290.87    8.60
   6   8  -7  398.66   10.20
   7   8   7   23.01    4.10
   7   8  -7   63.12    4.80
   8   8   7  118.83    5.90
   8   8  -7  114.67    5.90
   9   8   7  132.30    6.20
   9   8  -7   36.68    4.40
  11   8  -7   84.86    5.60
   0   9   7   13.90    4.30
   1   9   7   25.76    4.70
   1   9  -7   22.21    4.50
   2   9   7   -0.03    4.30
   2   9  -7   48.03    5.00
   3   9   7    5.26    4.00
   3   9  -7    3.87    4.60
   4   9   7   57.32    4.90
   4   9  -7   -0.69    3.80
   5   9   7    2.40    4.00
   5   9  -7    4.00    4.00
   6   9   7   31.72    4.40
   6   9  -7   20.51    4.30
   7   9  -7   26.60    4.30
   8   9   7   42.98    4.70
   9   9   7   31.13    4.60
  11   9  -7   44.54    5.00
  14   9   7   45.99    4.70
   0  10   7  161.44    7.20
   1  10   7   14.67    4.80
   1  10  -7  198.76    7.80
   2  10   7   12.13    4.70
   2  10  -7  570.41   13.50
   3  10   7   10.19    4.60
   3  10  -7  184.62    7.50
   4  10   7  314.30    9.40
   4  10  -7   20.51    4.50
   5  10   7  155.64    6.90
   5  10  -7   35.34    4.80
   6  10  -7   71.14    5.50
   7  10   7   49.16    5.00
   8  10  -7   35.45    4.90
   9  10   7   65.65    5.40
  10  10  -7   84.81    5.90
  12  10   7  102.54    6.30
   0  11   7    9.31    4.60
   1  11   7   15.40    4.70
   1  11  -7   39.08    5.10
   2  11  -7    3.49    4.50
   3  11   7   38.39    5.70
   3  11  -7   18.50    5.10
   4  11  -7   20.02    5.40
   6  11  -7   37.67    5.10
  11  11   7   80.20    5.80
  13  11   7   61.92    5.30
   0  12   7  242.61    8.90
   1  12   7   48.14    5.70
   1  12  -7  387.24   11.30
   2  12  -7  275.91    9.50
   3  12   7   59.54    6.10
   3  12  -7   49.79    5.80
   4  12   7  144.30    7.70
   5  12   7  145.31    7.20
   6  12  -7   48.18    5.50
   8  12  -7   32.04    5.40
  11  12   7   71.16    5.70
   1  13  -7   20.82    5.30
   2  13   7   71.97    6.30
   3  13   7   11.84    5.20
   5  13   7   22.79    5.30
   6  13   7   32.54    5.60
  10  13   7   25.67    4.90
   4  14   7   21.61    5.40
   5  14   7   14.01    5.00
   6  14   7   47.11    6.10
   4  15   7   34.67    6.60
   5  15   7   17.64    6.20
   0   0   8    9.74    2.20
   1   0   8 1950.49   35.40
   1   0  -8 1488.07   28.20
   2   0   8  277.92    5.80
   2   0  -8 1141.19   21.80
   3   0   8  889.77   15.30
   3   0  -8  219.50    7.70
   4   0   8  597.57   11.30
   4   0  -8 1526.77   31.10
   5   0   8 1902.05   31.10
   5   0  -8 1992.60   32.40
   6   0   8  439.60    9.30
   6   0  -8   53.53    3.30
   7   0   8   19.46    2.70
   7   0  -8 1352.59   23.10
   8   0   8  432.29    9.60
   8   0  -8  204.55    5.90
   9   0   8   61.99    3.90
   9   0  -8    7.45    2.80
  10   0   8 1407.85   25.10
  10   0  -8  195.04    6.30
  11   0  -8  258.02    7.70
  12   0  -8  236.48    7.60
  13   0   8  210.13    7.40
  13   0  -8   77.47    5.00
  14   0  -8  259.27    8.40
  15   0  -8   98.59    5.70
   0   1   8  120.13    3.40
   1   1   8 1001.31   16.60
   1   1  -8  349.04    8.60
   2   1   8   37.32    2.20
   2   1  -8  809.97   16.60
   3   1   8    3.25    2.00
   3   1  -8  516.44   12.10
   4   1   8   -1.27    2.20
   4   1  -8    1.63    3.00
   5   1   8   15.60    2.70
   5   1  -8   27.66    2.80
   6   1   8  248.64    6.40
   6   1  -8  519.30   10.40
   7   1   8    6.84    2.50
   7   1  -8   40.39    3.00
   8   1   8   44.28    3.30
   8   1  -8   45.50    3.30
   9   1   8    2.09    2.80
   9   1  -8   19.15    3.00
  10   1   8   24.51    3.40
  10   1  -8  166.98    5.90
  12   1   8  218.32    7.40
  13   1  -8  162.14    6.60
  14   1   8   56.21    4.80
  14   1  -8   70.02    5.10
  15   1   8  103.42    5.80
   0   2   8    4.51    1.80
   1   2   8  100.15    3.30
   1   2  -8  462.69   10.90
   2   2   8   25.81    2.30
   2   2  -8  399.54   10.10
   3   2   8  110.18    4.00
   3   2  -8 1353.61   26.40
   4   2   8  846.57   15.20
   4   2  -8  811.92   14.60
   5   2   8  627.81   12.20
   5   2  -8   58.43    3.40
   6   2   8  172.19    5.20
   6   2  -8   -1.37    2.40
   7   2   8  293.22    7.20
   7   2  -8  186.71    5.60
   8   2   8   10.02    2.80
   8   2  -8  248.93    6.70
   9   2   8  271.59    7.50
   9   2  -8  213.42    6.40
  10   2   8   36.92    3.70
  10   2  -8   82.34    4.50
  11   2   8  244.26    7.60
  12   2   8  130.07    5.90
  15   2  -8  107.00    5.90
   0   3   8  110.19    3.90
   1   3   8  242.80    6.00
   1   3  -8   38.04    3.60
   2   3   8  234.82    5.90
   2   3  -8   22.07    3.90
   3   3   8  100.03    4.00
   3   3  -8  136.23    4.60
   4   3   8  152.92    4.90
   4   3  -8    9.49    2.60
   5   3   8  185.08    5.60
   5   3  -8  449.08    9.50
   6   3   8   75.58    3.70
   6   3  -8  131.95    4.60
   7   3   8   81.40    4.00
   7   3  -8    2.59    2.50
   8   3   8   61.00    3.90
   8   3  -8   -0.67    2.60
   9   3   8    2.15    3.10
   9   3  -8  200.54    6.40
  10   3   8   30.33    3.70
  10   3  -8   92.16    4.80
  11   3   8  178.75    6.60
  12   3   8  150.32    6.30
  12   3  -8  106.93    5.50
   0   4   8   35.70    3.30
   1   4   8 1703.19   28.30
   1   4  -8   13.39    2.80
   2   4   8  137.33    4.90
   2   4  -8  818.30   15.00
   3   4   8   80.44    4.20
   3   4  -8  526.99   10.70
   4   4   8  329.63    8.10
   4   4  -8   82.72    4.50
   5   4   8   34.35    3.10
   5   4  -8  276.88    7.00
   6   4   8  323.86    7.80
   6   4  -8   18.30    2.80
   7   4   8   86.53    4.20
   7   4  -8  275.06    7.20
   8   4   8  632.79   13.10
   8   4  -8  302.16    7.90
   9   4   8    0.43    3.10
   9   4  -8  746.31   15.00
  11   4   8  274.94    8.30
  12   4   8   69.18    4.90
  12   4  -8  154.49    6.40
  13   4  -8  119.16    6.00
   0   5   8  171.67    5.80
   1   5   8   87.71    4.60
   1   5  -8    1.10    3.40
   2   5   8    8.28    3.50
   2   5  -8   91.08    4.70
   3   5   8  199.41    6.20
   3   5  -8   10.28    3.40
   4   5   8    7.53    3.00
   4   5  -8  454.75   10.00
   5   5   8  113.92    4.70
   5   5  -8  167.70    5.50
   6   5   8    6.60    2.90
   6   5  -8    0.93    2.80
   7   5   8    2.22    2.90
   7   5  -8   80.79    4.30
   8   5   8  151.50    5.80
   8   5  -8   30.88    3.60
   9   5   8   20.59    3.60
   9   5  -8  128.62    5.50
  10   5   8  271.44    8.20
  10   5  -8   55.61    4.40
  11   5  -8  305.30    8.90
  13   5   8  125.55    6.20
  14   5   8  123.99    6.30
   0   6   8  735.61   14.40
   1   6   8  492.85   10.70
   1   6  -8  191.49    6.20
   2   6   8  782.71   15.00
   2   6  -8   76.66    4.10
   3   6   8  224.96    6.60
   3   6  -8   -3.24    2.90
   4   6   8   81.71    4.50
   4   6  -8  224.81    6.70
   5   6   8   38.67    3.60
   5   6  -8    3.72    3.00
   6   6   8   44.28    3.90
   6   6  -8    1.98    3.00
   7   6   8  355.85    9.20
   7   6  -8   82.80    4.70
   8   6   8   13.60    3.50
   8   6  -8    6.36    3.40
  10   6   8   87.85    5.20
  10   6  -8   87.39    5.10
  11   6  -8  114.40    5.80
  12   6  -8   94.95    5.60
   0   7   8   -1.46    3.40
   1   7   8    0.72    3.20
   1   7  -8   -1.72    3.20
   2   7   8   18.35    3.40
   2   7  -8    3.04    3.20
   3   7   8  118.02    5.40
   3   7  -8  106.72    5.10
   4   7   8   53.15    4.20
   4   7  -8   16.27    3.60
   5   7   8   18.82    3.70
   5   7  -8    2.66    3.30
   6   7   8   32.14    4.00
   6   7  -8   59.46    4.40
   7   7   8   20.60    3.80
   7   7  -8    8.45    3.50
   8   7  -8   32.48    4.10
  10   7   8   90.99    5.40
  10   7  -8   95.28    5.50
  11   7  -8   93.05    5.60
  13   7   8   82.48    5.60
   0   8   8  553.15   12.40
   1   8   8  268.50    8.30
   1   8  -8  602.10   13.30
   2   8   8  520.56   12.20
   2   8  -8   37.26    5.00
   3   8   8   60.71    4.80
   3   8  -8  319.41    8.80
   4   8   8   -0.06    3.70
   4   8  -8   39.59    4.40
   5   8   8   35.96    4.20
   5   8  -8    2.04    3.60
   6   8   8  564.52   12.90
   6   8  -8    1.18    3.70
   7   8   8   88.14    5.30
   7   8  -8   55.48    4.70
   8   8   8   26.12    4.20
   8   8  -8   50.48    4.70
   9   8  -8  187.71    7.20
  10   8  -8  122.42    6.20
  11   8  -8  380.93   10.70
   0   9   8   61.84    5.20
   1   9   8   19.86    4.60
   1   9  -8    2.83    4.30
   2   9   8   28.85    4.40
   2   9  -8    0.91    4.50
   3   9   8   27.41    4.50
   3   9  -8   12.10    4.40
   4   9   8    6.21    4.00
   4   9  -8   34.63    4.50
   5   9   8   11.83    4.10
   5   9  -8   -6.43    3.90
   7   9  -8   19.88    4.20
   8   9   8   46.39    4.80
  10   9   8   53.45    5.00
  12   9   8   79.69    5.90
   0  10   8  206.89    7.90
   1  10   8  373.17   10.50
   1  10  -8   30.04    5.00
   2  10   8   17.24    4.90
   2  10  -8   14.27    4.80
   3  10   8   49.75    5.00
   3  10  -8   99.13    6.00
   4  10   8    7.30    4.20
   4  10  -8    4.33    4.20
   5  10   8  422.97   11.20
   5  10  -8   71.35    5.40
   6  10   8   55.95    5.10
   7  10  -8  164.45    7.20
   8  10   8  100.22    6.10
   0  11   8    1.84    4.50
   1  11   8    0.79    4.50
   1  11  -8   62.61    5.60
   2  11  -8    4.81    4.70
   3  11  -8   35.35    5.60
   4  11   8   17.39    4.70
   5  11   8   32.93    5.00
   5  11  -8   15.91    4.70
   6  11  -8   63.29    5.60
   7  11   8   31.17    4.90
   0  12   8   13.33    5.00
   1  12   8   20.62    5.20
   1  12  -8   69.46    6.10
   2  12   8   32.53    5.50
   3  12  -8   28.85    5.60
   4  12   8  105.74    6.50
   4  12  -8  101.31    6.90
   5  12  -8   23.98    5.00
   6  12  -8   42.12    5.40
   7  12   8   33.30    5.30
   7  12  -8   34.72    5.30
   4  13  -8   16.40    5.40
  10  13   8   25.01    4.90
   6  15   8    5.27    5.20
   0   1   9 1000.01   16.70
   1   1   9  495.26    9.20
   1   1  -9  483.98   10.30
   2   1   9  496.34    9.40
   2   1  -9  393.73    9.90
   3   1   9   -0.96    2.20
   3   1  -9 1071.50   21.70
   4   1   9   33.47    2.80
   4   1  -9   35.87    2.80
   5   1   9  244.02    6.30
   5   1  -9  126.94    4.40
   6   1   9  331.36    7.60
   6   1  -9   18.53    2.60
   7   1   9  954.60   17.30
   7   1  -9  154.89    4.90
   8   1   9  152.81    5.20
   8   1  -9  198.01    5.80
   9   1   9    3.85    2.90
   9   1  -9   88.27    4.30
  10   1   9   75.31    4.40
  10   1  -9   35.28    3.60
  11   1  -9   67.94    4.50
  12   1   9   46.42    4.30
  13   1  -9   82.71    5.10
  14   1  -9   56.54    4.80
  17   1   9  147.24    6.50
   0   2   9    1.06    1.80
   1   2   9   28.73    2.30
   1   2  -9  486.07   10.60
   2   2   9   50.60    2.90
   2   2  -9  586.81   13.60
   3   2   9 1095.14   18.90
   3   2  -9  203.97    7.20
   4   2   9  149.63    4.80
   4   2  -9 1359.58   22.90
   5   2   9  248.78    6.80
   5   2  -9  944.34   17.00
   6   2   9  153.27    4.90
   6   2  -9  515.93   10.50
   7   2   9    0.94    2.50
   7   2  -9  139.34    4.80
   8   2   9   37.09    3.30
   8   2  -9    8.87    2.70
   9   2   9  533.59   11.60
   9   2  -9    6.66    2.90
  10   2   9    5.83    3.10
  10   2  -9   17.06    3.30
  11   2   9   79.26    4.80
  11   2  -9   36.19    3.90
  12   2  -9  209.62    7.20
  13   2  -9  246.75    8.10
  14   2  -9  246.67    8.30
   0   3   9  242.25    6.10
   1   3   9  126.86    4.30
   1   3  -9 1396.75   25.90
   2   3   9  716.85   13.30
   2   3  -9    4.34    2.60
   3   3   9   39.80    3.20
   3   3  -9   20.11    3.00
   4   3   9  180.59    5.50
   4   3  -9  497.55   10.20
   5   3   9  110.31    4.30
   5   3  -9    0.13    2.60
   6   3   9  286.52    7.10
   6   3  -9   37.06    3.10
   7   3   9    2.21    2.60
   7   3  -9   15.56    2.80
   8   3   9  156.88    5.50
   8   3  -9   17.36    3.00
   9   3   9  342.28    8.80
   9   3  -9   77.54    4.40
  10   3   9   22.35    3.60
  10   3  -9   75.53    4.50
  15   3  -9   70.65    5.20
   0   4   9  276.49    6.90
   1   4   9  105.02    4.40
   1   4  -9   38.51    3.30
   2   4   9  615.67   12.10
   2   4  -9  326.94    7.70
   3   4   9   84.13    4.60
   3   4  -9  231.08    6.50
   4   4   9  101.65    4.20
   4   4  -9  295.17    7.50
   5   4   9   26.07    3.00
   5   4  -9   19.64    2.80
   6   4   9  109.90    4.50
   6   4  -9  185.59    5.60
   7   4   9  176.63    5.80
   7   4  -9  206.47    6.10
   8   4   9  615.88   12.90
   8   4  -9   25.47    3.30
   9   4   9   40.91    3.90
   9   4  -9   -1.37    3.00
  10   4  -9  123.56    5.50
  11   4   9   87.86    5.10
  11   4  -9   96.95    5.20
  12   4   9   50.75    4.60
  12   4  -9   66.20    4.80
  14   4  -9   99.45    5.80
   0   5   9   22.73    3.70
   1   5   9   53.09    4.10
   1   5  -9   92.28    4.70
   2   5   9   95.25    4.70
   2   5  -9    9.03    3.60
   3   5   9   -3.93    2.80
   3   5  -9    7.05    3.40
   4   5   9   81.42    4.20
   4   5  -9    7.26    3.10
   5   5   9   21.72    3.10
   5   5  -9    9.50    2.90
   6   5   9   19.96    3.10
   6   5  -9   -1.74    2.70
   7   5   9    2.68    3.00
   7   5  -9    0.09    2.90
   8   5   9   29.99    3.70
   8   5  -9   49.50    4.00
   9   5   9  165.32    6.30
   0   6   9   99.23    4.50
   1   6   9   -0.09    3.00
   1   6  -9  191.49    5.90
   2   6   9   50.21    3.90
   2   6  -9  424.97    9.60
   3   6   9   55.68    4.00
   3   6  -9   86.51    4.40
   4   6   9  130.40    5.20
   4   6  -9  345.80    8.40
   5   6   9   52.53    3.90
   5   6  -9   38.46    3.60
   6   6   9   33.84    3.80
   6   6  -9    7.67    3.20
   7   6   9 1078.31   20.20
   7   6  -9  360.20    9.20
   8   6   9   74.50    4.70
   8   6  -9  208.18    6.90
   9   6  -9  142.42    6.00
  10   6   9  124.80    5.90
  10   6  -9  159.47    6.40
  12   6  -9   54.14    4.80
   0   7   9   55.15    4.00
   1   7   9  177.50    6.10
   1   7  -9  278.33    7.60
   2   7   9  399.92    9.60
   2   7  -9   30.18    3.80
   3   7   9    3.58    3.30
   3   7  -9   -0.80    3.50
   4   7   9   39.38    4.00
   4   7  -9   82.67    4.70
   5   7   9   19.37    3.70
   5   7  -9    3.36    3.40
   6   7   9   65.72    4.60
   6   7  -9   15.86    3.70
   7   7   9   75.92    4.90
   7   7  -9   29.44    3.90
   9   7   9   94.91    5.40
   9   7  -9  107.73    5.60
  10   7   9  214.68    7.60
  10   7  -9  125.65    6.10
  11   7   9   72.07    5.20
   0   8   9   -0.67    4.20
   1   8   9    2.85    4.30
   1   8  -9   48.43    5.10
   2   8   9   69.61    5.10
   2   8  -9    1.57    4.20
   3   8   9   75.50    5.00
   3   8  -9  126.69    5.80
   4   8   9    3.40    3.60
   4   8  -9   14.10    3.90
   5   8   9  111.49    5.60
   5   8  -9   78.04    5.00
   6   8   9  277.90    8.40
   6   8  -9  269.90    8.30
   7   8  -9   45.74    4.60
   8   8   9   50.77    4.70
   9   8   9  110.45    5.90
   0   9   9   38.37    5.10
   1   9   9   35.14    4.50
   1   9  -9    8.06    4.00
   2   9   9    3.94    4.10
   2   9  -9  103.50    5.80
   3   9   9   33.00    4.50
   3   9  -9   37.25    4.70
   4   9   9   -0.83    3.90
   4   9  -9    1.88    4.00
   5   9   9  104.17    5.70
   5   9  -9   26.26    4.40
   6   9   9   16.05    4.10
   6   9  -9   45.11    4.70
   8   9  -9   68.32    5.30
   9   9  -9   93.39    5.80
  11   9   9  101.31    6.10
   0  10   9   56.27    5.50
   1  10   9   25.22    5.00
   1  10  -9   42.59    5.30
   2  10   9  122.50    6.30
   2  10  -9  342.11    9.90
   3  10   9   77.92    5.50
   3  10  -9   -2.41    3.90
   4  10   9   95.44    5.80
   4  10  -9    4.59    4.20
   5  10   9  281.73    9.00
   5  10  -9  221.84    8.00
   6  10   9   34.75    4.70
   6  10  -9   77.77    5.60
   9  10  -9   83.38    5.80
  10  10  -9  168.80    7.50
   0  11   9   33.44    5.30
   1  11   9    1.47    4.80
   1  11  -9   63.36    5.80
   2  11  -9   29.55    5.50
   3  11  -9   46.78    5.90
   4  11  -9   42.13    5.10
   5  11  -9   23.46    4.80
   6  11  -9   26.39    4.90
   7  11  -9   52.90    5.50
   8  11  -9   51.31    5.40
   1  12   9   99.12    6.70
   1  12  -9  153.81    7.60
   2  12   9   38.34    5.80
   2  12  -9   38.88    5.70
   3  12   9  158.05    7.90
   3  12  -9   30.02    5.60
   4  12   9  299.83    9.80
   4  12  -9   84.42    6.50
   5  12   9   42.84    5.30
   1  13  -9   11.27    5.20
   2  13  -9   48.75    5.90
   3  13  -9   15.74    5.50
   5  13  -9   21.52    6.30
   4  14   9   72.79    6.20
   8  14   9   17.41    5.20
   6  15   9    5.45    5.60
   0   0  10   89.34    3.10
   1   0  10 1220.94   20.20
   1   0 -10  138.29    5.20
   2   0  10  829.48   14.50
   2   0 -10    7.97    2.80
   3   0  10   43.09    2.90
   3   0 -10  991.98   22.40
   4   0  10 2509.40   40.20
   4   0 -10 1975.70   32.10
   5   0  10   38.31    3.10
   5   0 -10  679.56   12.80
   6   0  10    1.21    2.30
   6   0 -10  903.67   16.30
   7   0  10    7.80    2.60
   7   0 -10    5.86    2.40
   8   0  10  112.67    4.60
   8   0 -10   -2.23    2.40
   9   0  10   -0.70    2.80
   9   0 -10   24.05    3.20
  10   0  10  422.19   10.20
  10   0 -10    0.75    2.90
  11   0  10  269.49    8.00
  12   0 -10  282.30    8.40
  13   0  10  153.90    6.50
  13   0 -10  312.97    9.20
   0   1  10   90.89    3.20
   1   1  10   83.18    3.20
   1   1 -10  186.98    5.60
   2   1  10  457.81    9.00
   2   1 -10  386.59   10.20
   3   1  10   17.46    2.50
   3   1 -10  135.56    5.70
   4   1  10  218.78    5.80
   4   1 -10  402.47    8.50
   5   1  10  154.06    4.90
   5   1 -10   42.40    3.10
   6   1  10   16.63    2.60
   6   1 -10   36.92    2.90
   7   1  10  283.56    7.10
   7   1 -10  376.62    8.50
   8   1  10   33.58    3.20
   8   1 -10    6.29    2.60
   9   1  10    3.48    2.90
   9   1 -10   42.47    3.60
  10   1  10   -1.78    2.90
  10   1 -10  102.41    4.90
  12   1 -10   99.65    5.30
   0   2  10  228.25    5.60
   1   2  10  184.42    5.00
   1   2 -10    0.98    2.60
   2   2  10  266.45    6.40
   2   2 -10    6.93    3.40
   3   2  10   93.56    3.80
   3   2 -10  615.26   11.70
   4   2  10    2.20    2.60
   4   2 -10    7.66    2.60
   5   2  10  180.67    5.50
   5   2 -10   68.60    4.10
   6   2  10    7.82    2.50
   6   2 -10  132.59    4.60
   7   2  10   13.15    2.70
   7   2 -10  113.98    4.40
   8   2  10    6.74    2.80
   8   2 -10   -0.28    2.50
   9   2  10  218.11    6.70
   9   2 -10    2.95    2.80
  10   2  10   46.63    4.00
  10   2 -10   19.22    3.30
  11   2  10   93.48    5.10
  11   2 -10  118.69    5.50
  12   2  10  132.68    6.00
  12   2 -10   41.28    4.20
   0   3  10  144.07    4.70
   1   3  10  287.94    6.90
   1   3 -10    2.31    2.60
   2   3  10  326.88    7.60
   2   3 -10  276.61    6.70
   3   3  10    2.82    2.60
   3   3 -10   41.01    3.10
   4   3  10    1.52    2.80
   4   3 -10   19.32    3.10
   5   3  10   -0.73    2.40
   5   3 -10    4.18    2.50
   6   3  10   -0.30    2.50
   6   3 -10    0.11    2.40
   7   3  10  199.15    6.00
   7   3 -10  240.37    6.60
   8   3  10  587.50   12.40
   8   3 -10   45.41    3.60
   9   3  10   24.59    3.50
   9   3 -10   12.38    3.30
  10   3 -10   59.48    4.40
  12   3 -10  210.33    7.40
  16   3  10  109.82    5.90
   0   4  10   10.51    2.90
   1   4  10   31.62    3.30
   1   4 -10    0.99    2.80
   2   4  10  206.93    6.10
   2   4 -10  269.54    6.90
   3   4  10   67.34    4.40
   3   4 -10  729.53   14.00
   4   4  10  533.15   10.90
   4   4 -10   25.56    3.20
   5   4  10    4.91    2.70
   5   4 -10   13.79    2.70
   6   4  10   57.93    3.70
   6   4 -10  483.68   10.30
   7   4  10  123.67    5.00
   7   4 -10   63.19    3.80
   8   4  10   71.62    4.40
   8   4 -10  136.47    5.30
   9   4  10   37.84    3.90
   9   4 -10    1.82    3.10
  10   4 -10   51.01    4.30
  12   4  10   65.37    4.90
  17   4  10   47.94    4.50
   0   5  10  251.72    7.00
   1   5  10    8.28    3.40
   1   5 -10   31.54    3.80
   2   5  10   42.21    3.90
   2   5 -10   37.55    3.80
   3   5  10  468.55   10.10
   3   5 -10   -5.22    2.80
   4   5  10  127.74    5.00
   4   5 -10  170.74    5.50
   5   5  10   73.05    4.00
   5   5 -10    7.15    2.80
   6   5  10  129.22    5.10
   6   5 -10  264.25    7.20
   7   5  10  106.23    4.90
   7   5 -10   41.82    3.70
   8   5  10   71.78    4.50
   8   5 -10   62.94    4.20
   9   5  10  280.49    8.20
   9   5 -10  302.84    8.50
  10   5  10   72.80    4.80
  10   5 -10  229.64    7.50
  11   5 -10   83.91    5.20
  13   5 -10  155.28    6.80
  14   5 -10   66.61    5.20
  15   5  10  115.53    6.20
   0   6  10   11.33    3.20
   1   6  10  218.57    6.50
   1   6 -10   53.98    3.90
   2   6  10   24.54    3.50
   2   6 -10  214.36    6.40
   3   6  10  186.00    6.10
   3   6 -10    2.37    3.20
   4   6  10    0.48    2.90
   4   6 -10   61.06    4.00
   5   6  10  159.07    5.70
   5   6 -10   36.20    3.60
   6   6  10  167.03    6.10
   6   6 -10   11.09    3.30
   7   6  10   12.00    3.50
   7   6 -10  110.00    5.20
   8   6  10   46.84    4.20
   8   6 -10   15.02    3.70
  11   6 -10   41.63    4.40
  12   6  10   55.00    4.90
   0   7  10    6.96    3.50
   1   7  10   24.68    3.80
   1   7 -10   43.95    4.10
   2   7  10   14.70    3.50
   2   7 -10   63.59    4.50
   3   7  10    4.47    3.30
   3   7 -10   -0.15    3.20
   4   7  10   57.09    4.40
   4   7 -10   36.15    3.90
   5   7  10    0.88    3.40
   5   7 -10   18.53    3.70
   6   7  10  194.11    6.70
   6   7 -10    2.42    3.40
   7   7  10   22.78    3.90
   7   7 -10    4.65    3.60
   8   7 -10   38.83    4.30
   9   7  10  113.45    5.70
  10   7  10   41.25    4.50
  14   7  10   80.48    5.60
   0   8  10  122.90    6.00
   1   8  10    2.78    3.90
   1   8 -10   59.30    4.90
   2   8  10   61.86    4.70
   2   8 -10   30.11    4.20
   3   8  10   38.33    4.40
   3   8 -10   35.35    4.30
   4   8  10   11.92    3.80
   4   8 -10   56.63    4.60
   5   8  10  107.63    5.60
   5   8 -10  102.71    5.40
   6   8  10  253.68    8.00
   6   8 -10   22.49    4.10
   7   8  10   34.36    4.30
   8   8 -10  404.73   10.60
   9   8 -10   51.11    4.80
  10   8 -10   51.21    4.90
  12   8  10   57.03    5.10
  12   8 -10   50.89    5.10
   0   9  10  105.63    5.80
   1   9  10   28.31    4.60
   1   9 -10   32.79    4.60
   2   9  10   19.06    4.30
   2   9 -10   43.59    4.80
   3   9  10   38.16    4.60
   3   9 -10    3.01    3.90
   4   9  10   11.25    4.20
   4   9 -10   90.04    5.50
   5   9 -10   32.94    4.50
   6   9  10   20.21    4.20
   6   9 -10   44.74    4.70
   7   9 -10   56.03    5.00
   8   9  10   50.15    4.90
   8   9 -10   38.74    4.80
   9   9 -10  135.27    6.60
  13   9  10   80.27    5.50
   0  10  10    8.93    4.50
   1  10  10   18.76    4.40
   1  10 -10    1.08    4.20
   2  10  10   -1.01    3.90
   2  10 -10   20.99    4.50
   3  10  10    4.04    4.20
   3  10 -10    9.90    4.30
   4  10  10  129.31    6.40
   5  10  10   74.92    5.50
   7  10  10   40.19    4.90
   7  10 -10   57.97    5.20
   8  10 -10   54.99    5.30
  11  10  10   50.98    5.50
   0  11  10    9.54    5.20
   1  11 -10   54.09    5.90
   2  11  10   13.26    4.60
   4  11  10   63.76    5.50
   4  11 -10   15.77    4.60
   6  11  10   56.91    5.50
   7  11 -10   42.32    5.20
   8  11 -10   93.00    6.20
  12  11  10  175.85    7.30
   0  12  10   59.75    6.10
   1  12 -10   36.93    5.80
   3  12  10   42.80    5.30
   4  12  10   33.14    5.10
   4  12 -10   96.00    6.30
   5  12 -10   56.44    5.60
   6  12 -10  107.58    6.60
   7  12 -10   28.68    5.20
  10  12  10   35.08    5.10
   1  13  10   15.95    5.30
   1  13 -10   44.29    5.80
   2  13 -10   90.74    6.80
   3  13  10   31.82    5.70
   3  13 -10   14.89    5.40
   4  13 -10   32.89    6.10
   7  13  10   68.71    6.50
   4  15  10    9.37    5.60
   0   1  11  116.09    3.90
   1   1  11  118.33    4.00
   1   1 -11  144.48    5.20
   2   1  11    1.99    2.40
   2   1 -11  667.65   15.30
   3   1  11 1538.63   25.60
   3   1 -11   12.45    2.40
   4   1  11   42.42    3.10
   4   1 -11    3.53    2.40
   5   1  11   -1.96    2.30
   5   1 -11  203.25    5.60
   6   1  11  507.45   10.40
   6   1 -11  116.16    4.30
   7   1  11    7.70    2.60
   7   1 -11   59.11    3.50
   8   1  11  275.11    7.30
   8   1 -11   79.55    4.00
   9   1  11  203.07    6.50
   9   1 -11    3.28    2.80
  10   1  11  527.37   11.90
  10   1 -11   33.55    3.60
  11   1  11   99.17    5.20
  11   1 -11  256.09    7.80
  17   1  11   82.06    5.20
   0   2  11    1.94    2.40
   1   2  11  850.95   15.20
   1   2 -11 1249.97   21.10
   2   2  11    7.24    2.50
   2   2 -11   46.65    3.10
   3   2  11  265.68    6.60
   3   2 -11  376.64    8.20
   4   2  11  126.78    5.10
   4   2 -11  165.22    5.20
   5   2  11  200.60    5.70
   5   2 -11  583.45   11.50
   6   2  11    6.16    2.50
   6   2 -11   -0.63    2.50
   7   2  11   60.95    3.70
   7   2 -11  102.68    4.30
   8   2  11   16.58    3.10
   8   2 -11    2.76    2.60
   9   2  11   10.41    3.10
   9   2 -11   19.71    3.20
  10   2  11  110.17    5.20
  10   2 -11   21.27    3.50
  11   2 -11  153.31    6.10
  14   2  11  122.62    6.20
   0   3  11    0.33    2.70
   1   3  11  182.70    5.40
   1   3 -11  171.37    5.20
   2   3  11  229.05    6.10
   2   3 -11   57.51    3.40
   3   3  11  602.35   11.90
   3   3 -11  471.52    9.80
   4   3  11  499.56   10.30
   4   3 -11  287.37    7.10
   5   3  11  591.18   11.80
   5   3 -11  270.04    6.80
   6   3  11  324.26    7.80
   6   3 -11  164.68    5.30
   7   3  11   17.29    3.00
   7   3 -11   35.15    3.20
   8   3  11   -1.57    2.90
   8   3 -11   97.53    4.60
   9   3  11  364.86    9.30
   9   3 -11  172.29    6.10
  10   3 -11   68.02    4.50
  11   3  11   82.97    5.00
  12   3  11  151.93    6.40
  16   3  11   57.26    4.90
   0   4  11   12.03    3.30
   1   4  11   30.27    3.90
   1   4 -11   29.83    3.70
   2   4  11   12.81    3.60
   2   4 -11    4.76    3.60
   3   4  11  225.52    6.20
   3   4 -11  211.89    6.10
   4   4  11   13.59    2.80
   4   4 -11   69.26    3.70
   5   4  11    8.70    2.80
   5   4 -11   26.86    3.00
   6   4  11  135.20    5.00
   6   4 -11  198.52    5.90
   7   4  11   14.91    3.10
   7   4 -11    1.19    2.70
   8   4  11   57.12    4.10
   8   4 -11   15.53    3.30
   9   4  11   95.87    5.00
   9   4 -11    1.19    3.00
  10   4 -11  102.58    5.30
  13   4  11   84.45    5.40
  14   4  11   68.89    5.20
  14   4 -11   80.97    5.40
  15   4  11   95.25    5.70
   0   5  11   22.21    3.60
   1   5  11  268.92    7.00
   1   5 -11   43.02    3.80
   2   5  11   40.86    3.50
   2   5 -11   99.10    4.50
   3   5  11   28.29    3.30
   3   5 -11   21.04    3.30
   4   5  11    0.53    2.70
   4   5 -11   56.46    3.70
   5   5  11   -1.52    2.70
   5   5 -11   72.86    4.00
   6   5  11    1.25    2.90
   6   5 -11   20.33    3.20
   7   5  11   91.60    4.80
   7   5 -11  112.28    5.00
   8   5  11    0.44    3.20
   8   5 -11    9.74    3.20
   9   5  11   64.23    4.50
  10   5 -11   29.35    4.00
  11   5 -11   45.29    4.40
  15   5  11  142.38    6.70
   0   6  11    8.81    3.30
   1   6  11   71.11    4.20
   1   6 -11  530.20   11.20
   2   6  11  216.49    6.60
   2   6 -11   49.20    3.90
   3   6  11  291.94    7.70
   3   6 -11  406.08    9.40
   4   6  11   16.49    3.20
   4   6 -11   15.85    3.20
   5   6  11    1.50    3.10
   5   6 -11    8.46    3.10
   6   6  11   62.92    4.40
   6   6 -11   14.16    3.40
   7   6  11   59.07    4.30
   7   6 -11  239.92    7.30
   8   6  11   33.56    4.00
   8   6 -11   28.94    3.90
   9   6  11   68.73    4.80
   9   6 -11  283.13    8.40
  13   6  11  128.82    6.40
  16   6  11   63.96    5.00
   0   7  11   53.43    4.10
   1   7  11  115.77    5.20
   1   7 -11   50.82    4.10
   2   7  11   21.06    3.60
   2   7 -11   -1.82    3.20
   3   7  11   89.92    4.90
   3   7 -11    0.30    3.30
   4   7  11  330.36    8.80
   4   7 -11    3.05    3.40
   5   7  11  171.57    6.40
   5   7 -11  269.46    7.90
   6   7  11    8.09    3.60
   6   7 -11   69.94    4.60
   8   7 -11  283.82    8.50
   9   7  11   67.60    4.90
  10   7 -11  109.19    5.80
  13   7 -11   81.66    5.60
  14   7  11  238.69    8.40
   0   8  11  143.54    6.00
   1   8  11   65.99    4.80
   1   8 -11   15.33    3.90
   2   8  11   43.90    4.40
   2   8 -11   18.13    4.00
   3   8  11   49.06    4.40
   3   8 -11   25.75    4.10
   4   8  11   14.35    3.90
   4   8 -11  179.73    6.70
   5   8  11  113.99    5.70
   5   8 -11    3.80    3.70
   6   8 -11   18.26    4.00
   7   8 -11  110.18    5.80
   8   8  11   93.30    5.50
  12   8  11   53.75    5.10
   0   9  11   -2.13    4.00
   1   9  11   13.06    4.30
   1   9 -11   39.32    4.70
   2   9  11    8.11    4.00
   2   9 -11    5.93    4.00
   3   9  11    3.53    4.00
   3   9 -11   26.93    4.40
   4   9  11   11.32    4.00
   4   9 -11   37.67    4.70
   5   9  11  253.73    8.30
   5   9 -11    7.56    3.90
   6   9  11   54.32    4.90
   6   9 -11   42.09    4.70
   7   9  11   36.75    4.60
   7   9 -11  144.43    6.60
  11   9  11   60.27    5.30
  13   9  11  122.97    6.30
   0  10  11    1.65    4.10
   1  10  11  339.01    9.80
   1  10 -11    3.01    4.10
   2  10  11    7.18    4.20
   2  10 -11   19.67    4.40
   3  10  11   12.93    4.30
   3  10 -11   32.29    4.70
   4  10  11  190.47    7.50
   4  10 -11   34.79    4.80
   5  10 -11  142.03    6.70
   6  10 -11   58.00    5.20
   7  10  11   35.55    4.80
   7  10 -11   57.62    5.30
   8  10  11   40.73    5.00
   8  10 -11   54.96    5.30
   9  10 -11  168.92    7.40
  11  10  11   57.25    5.50
   0  11  11   20.86    5.50
   1  11  11   63.40    5.50
   2  11 -11   11.61    4.50
   3  11  11   66.20    5.60
   3  11 -11   23.22    4.80
   6  11  11   84.55    5.90
   6  11 -11   33.51    5.00
   8  11  11   38.04    5.10
  12  11  11   43.89    5.00
   0  12  11   25.10    5.60
   1  12 -11   25.56    5.60
   3  12  11   71.20    5.80
   6  12  11   45.59    5.50
  10  12  11   44.90    5.20
   2  13 -11   15.11    5.50
   7  13  11   43.17    6.20
   5  14  11   21.88    5.50
   5  15  11    9.74    5.40
   0   0  12 6715.17  109.20
   1   0  12    3.08    2.20
   1   0 -12 1278.01   21.50
   2   0  12  135.43    4.40
   2   0 -12  373.69    8.00
   3   0  12   96.92    3.90
   3   0 -12 1580.61   26.20
   4   0  12  182.19    5.40
   4   0 -12  849.39   15.40
   5   0  12   52.24    3.30
   5   0 -12  564.55   11.10
   6   0  12   -3.13    2.30
   6   0 -12  440.33    9.40
   7   0  12   41.25    3.30
   7   0 -12    9.55    2.60
   8   0  12   -1.21    2.70
   8   0 -12   -0.52    2.60
   9   0  12   14.15    3.20
   9   0 -12   52.62    3.80
  10   0  12  159.83    6.10
  10   0 -12  113.84    5.20
  11   0  12   96.95    5.20
  12   0  12  314.41    9.10
  12   0 -12   66.85    4.70
  13   0  12   59.50    4.80
  17   0  12  116.86    5.90
   0   1  12   -1.50    2.20
   1   1  12  136.47    4.30
   1   1 -12  101.52    3.80
   2   1  12  308.28    7.00
   2   1 -12   69.57    3.30
   3   1  12   74.92    3.60
   3   1 -12   20.10    2.70
   4   1  12  728.18   13.60
   4   1 -12   35.76    3.00
   5   1  12   40.59    3.00
   5   1 -12  111.79    4.20
   6   1  12   -1.39    2.30
   6   1 -12   -1.07    2.30
   7   1  12  241.78    6.60
   7   1 -12   -1.31    2.40
   8   1  12   35.42    3.40
   8   1 -12   24.40    3.10
   9   1  12   62.24    4.10
   9   1 -12  126.42    5.10
  11   1  12  340.45    9.30
   0   2  12  397.50    8.40
   1   2  12  381.24    8.20
   1   2 -12  789.55   14.30
   2   2  12   81.07    3.70
   2   2 -12  658.33   12.40
   3   2  12  122.75    4.60
   3   2 -12  159.72    5.00
   4   2  12   18.35    2.80
   4   2 -12    5.06    3.20
   5   2  12    1.86    2.40
   5   2 -12    1.59    2.50
   6   2  12   53.93    3.40
   6   2 -12   32.54    3.00
   7   2  12    1.54    2.60
   7   2 -12  136.64    4.90
   8   2  12    4.85    2.90
   8   2 -12   29.61    3.20
   9   2  12   39.25    3.70
   9   2 -12   16.11    3.20
  10   2  12   42.72    4.00
  11   2  12  208.75    7.20
  12   2  12   69.02    4.80
   0   3  12  392.06    8.50
   1   3  12   -0.54    2.50
   1   3 -12   14.82    2.70
   2   3  12  428.27    9.20
   2   3 -12    4.02    2.60
   3   3  12   35.28    3.40
   3   3 -12    1.77    2.70
   4   3  12  107.35    4.30
   4   3 -12  105.41    4.20
   5   3  12  103.67    4.30
   5   3 -12    9.20    2.60
   6   3  12  145.27    5.10
   6   3 -12   86.97    4.00
   7   3  12   92.94    4.40
   7   3 -12   50.45    3.60
   8   3  12  169.15    6.00
   8   3 -12   60.22    4.00
   9   3  12    3.39    3.10
   9   3 -12   21.48    3.40
  10   3  12  172.57    6.40
  10   3 -12   61.16    4.40
  11   3  12  169.14    6.60
  11   3 -12   56.53    4.50
  16   3  12   74.82    5.20
   0   4  12  752.80   14.30
   1   4  12  494.00   10.50
   1   4 -12   55.77    4.20
   2   4  12  157.93    5.10
   2   4 -12 2237.76   36.50
   3   4  12   49.52    3.40
   3   4 -12  191.24    5.60
   4   4  12    1.33    2.60
   4   4 -12  165.76    5.30
   5   4  12   15.09    2.90
   5   4 -12  321.36    7.80
   6   4  12    2.99    2.70
   6   4 -12   10.54    2.80
   7   4  12    1.55    2.90
   7   4 -12    4.71    2.90
   8   4  12   16.33    3.40
   8   4 -12  144.96    5.60
  10   4  12   58.38    4.50
  10   4 -12   97.80    5.20
  11   4 -12   52.44    4.50
   0   5  12   17.29    3.20
   1   5  12    8.98    3.00
   1   5 -12   83.24    4.20
   2   5  12   83.30    4.20
   2   5 -12  136.73    5.10
   3   5  12   21.30    3.30
   3   5 -12    3.04    2.80
   4   5  12   51.99    3.70
   4   5 -12   26.58    3.20
   5   5  12  307.68    7.90
   5   5 -12   66.64    4.00
   6   5  12  289.09    7.80
   6   5 -12   36.00    3.60
   7   5  12  108.03    5.10
   7   5 -12   -1.55    3.00
   8   5  12  131.91    5.70
   8   5 -12    1.21    3.10
   9   5  12   32.73    4.00
   9   5 -12   21.40    3.70
  10   5  12   58.42    4.60
  10   5 -12   80.63    5.00
  12   5  12  159.77    6.80
  13   5  12   88.25    5.60
  14   5 -12   89.90    5.70
   0   6  12   53.42    4.00
   1   6  12  175.99    5.90
   1   6 -12    0.34    3.20
   2   6  12   32.47    3.50
   2   6 -12  343.05    8.40
   3   6  12  145.69    5.40
   3   6 -12  110.76    4.80
   4   6  12    0.09    3.00
   4   6 -12   31.44    3.50
   5   6  12   29.06    3.70
   5   6 -12   14.70    3.30
   6   6  12    3.35    3.30
   6   6 -12  126.96    5.50
   7   6  12    0.74    3.20
   7   6 -12    9.89    3.40
   9   6  12   46.39    4.40
   0   7  12   35.89    3.90
   1   7  12    3.97    3.30
   1   7 -12  215.87    6.80
   2   7  12   73.36    4.60
   2   7 -12   46.86    4.10
   3   7  12   17.50    3.70
   3   7 -12   -1.60    3.20
   4   7  12   10.45    3.60
   4   7 -12   31.68    3.90
   5   7  12   13.23    3.60
   5   7 -12   16.33    3.70
   6   7  12  129.04    5.80
   6   7 -12    0.27    3.40
   7   7  12  152.58    6.30
   7   7 -12   13.94    3.80
   9   7 -12   33.52    4.30
   0   8  12   60.30    4.70
   1   8  12   33.31    4.30
   1   8 -12  130.62    5.90
   2   8  12   19.58    3.90
   2   8 -12  640.48   13.80
   3   8  12  170.12    6.50
   3   8 -12   -0.39    3.50
   4   8  12  131.03    6.00
   4   8 -12  148.97    6.20
   5   8  12   10.57    3.80
   5   8 -12    2.69    3.70
   7   8 -12   60.55    4.80
   8   8 -12   97.23    5.60
  10   8 -12   73.04    5.40
   0   9  12  133.55    6.20
   1   9  12   11.38    4.10
   1   9 -12   15.07    4.20
   2   9  12   91.15    5.60
   2   9 -12   11.35    4.10
   3   9  12   21.76    4.20
   3   9 -12   61.32    5.10
   4   9  12   21.16    4.20
   4   9 -12    8.69    4.00
   5   9  12   16.63    4.10
   5   9 -12   66.85    5.10
   6   9 -12   21.11    4.20
   9   9  12   52.41    5.00
   0  10  12  207.61    7.70
   1  10  12   82.73    5.60
   1  10 -12  139.66    6.60
   2  10  12   13.41    4.30
   2  10 -12    9.66    4.30
   3  10  12   15.51    4.30
   3  10 -12  193.64    7.50
   4  10  12  101.67    6.00
   4  10 -12   29.44    4.70
   5  10  12   26.31    4.60
   5  10 -12   70.75    5.50
  12  10  12   58.12    5.30
   0  11  12   13.89    4.50
   1  11  12   32.20    4.90
   3  11 -12   29.20    4.90
   4  11 -12   49.68    5.30
   5  11 -12   44.81    5.30
   6  11  12   97.62    6.20
   6  11 -12   62.09    5.60
  11  11  12   61.13    5.40
  12  11  12   91.99    5.90
   0  12  12   60.92    6.30
   2  12  12  154.49    7.40
   4  12 -12  144.93    7.20
   5  12  12   46.31    5.50
   6  12 -12   60.01    5.80
  10  12  12   56.58    5.40
   2  13  12  101.38    6.70
   4  13  12   30.70    5.60
   6  14  12   42.46    6.00
   0   1  13  231.93    5.90
   1   1  13  343.80    7.60
   1   1 -13    0.88    2.20
   2   1  13   38.11    3.00
   2   1 -13   62.86    3.40
   3   1  13   24.95    2.90
   3   1 -13    2.09    2.40
   4   1  13  127.97    4.50
   4   1 -13  313.55    7.30
   5   1  13   34.25    2.90
   5   1 -13    4.02    2.30
   6   1  13  240.62    6.50
   6   1 -13   57.99    3.40
   7   1  13    7.50    2.70
   7   1 -13   31.22    3.10
   8   1  13   30.22    3.40
   8   1 -13  196.55    6.10
   9   1  13  299.84    8.20
   9   1 -13    4.71    2.90
  10   1  13   80.60    4.70
  10   1 -13   99.10    5.00
  11   1  13   72.25    4.80
  12   1  13   99.65    5.40
  12   1 -13  172.47    6.70
  13   1 -13  176.52    7.00
   0   2  13  495.15   10.00
   1   2  13 2278.41   36.80
   1   2 -13  541.38   10.70
   2   2  13   65.70    3.70
   2   2 -13   67.01    3.60
   3   2  13  101.53    4.60
   3   2 -13  217.98    6.30
   4   2  13    2.05    2.40
   4   2 -13  720.41   13.50
   5   2  13   80.61    3.80
   5   2 -13  903.46   16.40
   6   2  13   -1.18    2.50
   6   2 -13   55.19    3.40
   7   2  13   29.93    3.20
   7   2 -13  187.40    5.80
   8   2  13   -1.47    2.90
   8   2 -13   96.88    4.50
   9   2  13   29.61    3.60
   9   2 -13   11.99    3.10
  10   2 -13   47.56    4.10
  13   2  13  339.91    9.80
  13   2 -13   56.29    4.70
   0   3  13   23.73    3.10
   1   3  13   59.29    3.70
   1   3 -13  571.78   11.40
   2   3  13   21.79    3.10
   2   3 -13   -1.93    2.70
   3   3  13   -1.45    2.50
   3   3 -13   55.69    3.30
   4   3  13  120.49    4.50
   4   3 -13   70.00    3.60
   5   3  13   27.16    3.00
   5   3 -13  180.32    5.50
   6   3  13   54.27    3.60
   6   3 -13   -0.22    2.60
   7   3  13  142.39    5.40
   7   3 -13   69.17    4.00
   8   3  13  139.50    5.60
   8   3 -13  336.15    8.60
   9   3 -13   -3.78    3.00
  11   3 -13  404.77   10.50
  13   3  13   61.18    4.90
  14   3 -13  160.44    6.90
   0   4  13  730.80   13.80
   1   4  13  495.04   10.30
   1   4 -13  354.62    8.10
   2   4  13 1337.98   23.00
   2   4 -13   24.03    3.00
   3   4  13  146.93    5.00
   3   4 -13  187.01    5.60
   4   4  13   48.27    3.50
   4   4 -13  401.64    9.00
   5   4  13   -0.70    2.60
   5   4 -13  123.24    4.70
   6   4  13  117.02    4.90
   6   4 -13   53.39    3.70
   7   4  13   35.62    3.70
   7   4 -13   44.35    3.70
   8   4  13   32.38    3.80
   8   4 -13   67.96    4.30
  10   4  13   45.49    4.30
  12   4  13  149.34    6.50
  14   4  13  191.56    7.50
  15   4  13   73.64    5.30
   0   5  13  227.33    6.50
   1   5  13   52.51    3.80
   1   5 -13  163.81    5.50
   2   5  13   52.06    3.90
   2   5 -13    4.03    2.80
   3   5  13  143.05    5.20
   3   5 -13  141.73    5.10
   4   5  13   25.35    3.20
   4   5 -13   15.98    3.10
   5   5  13    1.66    2.90
   5   5 -13    2.78    2.80
   6   5  13   98.74    4.80
   6   5 -13   32.39    3.50
   7   5  13   10.63    3.30
   7   5 -13   87.15    4.60
   8   5 -13   77.25    4.70
   9   5  13  165.03    6.40
   9   5 -13   49.59    4.30
  10   5 -13  138.47    6.10
  12   5 -13   76.39    5.20
   0   6  13  181.87    6.00
   1   6  13  310.78    8.00
   1   6 -13 1287.22   22.70
   2   6  13  553.15   11.70
   2   6 -13    8.12    3.10
   3   6  13  104.77    4.80
   3   6 -13  973.70   18.10
   4   6  13   70.67    4.40
   4   6 -13   16.05    3.40
   5   6  13   95.67    4.90
   5   6 -13    1.94    3.20
   6   6  13   44.24    4.10
   6   6 -13  328.93    8.70
   7   6  13   16.93    3.60
   7   6 -13   43.62    4.10
   8   6 -13   22.31    3.80
   9   6  13   55.57    4.60
   9   6 -13   62.14    4.70
  11   6  13  125.35    6.20
  11   6 -13   98.31    5.60
  14   6  13  173.49    7.30
   0   7  13    6.34    3.50
   1   7  13  106.99    5.20
   1   7 -13   39.15    4.00
   2   7  13   -0.33    3.30
   2   7 -13  294.38    8.10
   3   7  13  104.29    5.20
   3   7 -13   50.58    4.20
   4   7  13   -4.95    3.30
   4   7 -13   43.98    4.20
   5   7  13   -0.53    3.40
   5   7 -13  284.03    8.20
   6   7  13   99.14    5.30
   6   7 -13   67.30    4.70
   7   7  13  257.67    8.10
   7   7 -13   51.49    4.50
   8   7  13  294.46    8.80
   9   7 -13  305.24    9.10
  10   7 -13  155.82    6.70
  13   7  13   56.91    5.20
  14   7  13   94.22    5.70
   0   8  13  446.18   10.80
   1   8  13  202.80    7.00
   1   8 -13    8.82    3.70
   2   8  13    3.06    3.60
   2   8 -13   45.26    4.40
   3   8  13  196.70    7.00
   3   8 -13   68.74    4.80
   4   8  13   14.15    3.90
   4   8 -13   70.76    4.90
   5   8 -13    4.63    3.70
   8   8  13   37.12    4.50
  13   8  13   88.87    5.70
   0   9  13   58.15    5.00
   1   9  13   33.76    4.60
   1   9 -13    8.72    4.10
   2   9  13  118.88    5.90
   2   9 -13   32.70    4.60
   3   9  13   26.65    4.30
   3   9 -13  116.06    6.00
   4   9  13   47.22    4.70
   4   9 -13  102.83    5.70
   5   9  13  111.15    5.90
   7   9  13   60.85    5.10
   8   9  13  164.94    7.10
   8   9 -13  125.35    6.40
   9   9 -13   44.82    4.90
  10   9 -13   66.21    5.40
  13   9  13   75.07    5.30
   0  10  13    7.47    4.20
   1  10  13   36.34    4.70
   1  10 -13   10.60    4.30
   2  10  13   33.18    4.70
   2  10 -13   52.05    5.10
   3  10 -13  341.11    9.90
   4  10  13   34.42    4.70
   5  10  13  117.67    6.30
   5  10 -13   78.25    5.60
   6  10 -13   70.33    5.50
   8  10 -13  137.15    6.80
   3  11  13   57.65    5.40
   3  11 -13   30.89    4.90
   4  11  13   35.31    5.10
   4  11 -13   39.82    5.20
   8  11 -13   67.89    5.70
   9  11  13   72.27    5.90
  10  11  13   59.42    5.50
   0  12  13   44.70    5.30
   1  12  13   38.82    5.20
   1  12 -13   24.57    5.00
   2  12 -13   53.17    5.60
   4  12  13   31.77    5.10
   4  12 -13   91.02    6.30
   5  12  13  108.59    6.60
   5  12 -13   96.39    6.40
   6  12  13   76.44    6.00
   0  13  13   24.08    5.80
   1  13  13   18.70    5.10
   4  14  13   67.89    6.40
   6  14  13   30.62    5.60
   0   0  14  222.67    5.80
   1   0  14  227.99    5.90
   1   0 -14  188.43    5.30
   2   0  14 3093.61   49.10
   2   0 -14 2559.23   41.00
   3   0  14 1471.90   24.80
   3   0 -14  706.12   13.30
   4   0  14  444.28    9.40
   4   0 -14 1565.90   26.20
   5   0  14  725.40   13.80
   5   0 -14  161.21    5.00
   6   0  14    3.69    2.60
   6   0 -14  749.17   14.20
   7   0  14   11.40    2.90
   7   0 -14  338.80    8.20
   8   0  14   45.82    3.70
   8   0 -14  248.50    7.00
   9   0  14    7.02    3.20
   9   0 -14   80.89    4.50
  10   0  14   77.81    4.70
  10   0 -14  134.08    5.70
  11   0  14   60.83    4.60
  12   0  14  124.42    5.90
  14   0  14  177.45    7.20
  14   0 -14  603.04   14.10
  16   0  14  127.07    6.20
   0   1  14    2.47    2.40
   1   1  14   17.20    2.70
   1   1 -14   18.86    2.70
   2   1  14   16.89    2.80
   2   1 -14   -0.69    2.40
   3   1  14  289.97    7.00
   3   1 -14  100.84    4.10
   4   1  14    8.31    2.50
   4   1 -14    5.42    2.40
   5   1  14  497.72   10.40
   5   1 -14    4.03    2.40
   6   1  14   86.25    4.00
   6   1 -14    8.98    2.60
   7   1  14  195.86    6.10
   7   1 -14  114.66    4.60
   8   1  14  118.86    5.10
   8   1 -14   36.01    3.50
   9   1  14    8.28    3.20
   9   1 -14   85.90    4.60
  10   1  14  174.45    6.40
  12   1 -14   76.02    5.00
   0   2  14  142.79    4.90
   1   2  14  305.47    7.50
   1   2 -14  991.39   17.60
   2   2  14  183.88    5.70
   2   2 -14  450.40    9.70
   3   2  14 1130.84   19.70
   3   2 -14 1423.63   24.10
   4   2  14  662.80   12.80
   4   2 -14  372.13    8.30
   5   2  14  118.36    4.50
   5   2 -14   10.48    2.60
   6   2  14  245.85    6.70
   6   2 -14  180.14    5.60
   7   2  14   -2.17    2.70
   7   2 -14    3.14    2.60
   8   2  14    3.49    3.00
   8   2 -14    2.79    2.80
   9   2  14  114.70    5.30
   9   2 -14  153.78    5.80
  11   2  14  122.28    5.80
  11   2 -14   49.24    4.30
  13   2 -14   85.43    5.40
  15   2  14  131.57    6.40
   0   3  14   88.06    4.10
   1   3  14    1.00    2.50
   1   3 -14    9.35    2.80
   2   3  14   14.22    2.70
   2   3 -14   91.72    3.90
   3   3  14   69.69    3.60
   3   3 -14  318.06    7.50
   4   3  14    8.89    2.70
   4   3 -14   15.73    2.70
   5   3  14  469.60   10.10
   5   3 -14    6.06    2.60
   6   3  14   36.23    3.40
   6   3 -14   29.54    3.10
   7   3  14  144.50    5.50
   7   3 -14  196.04    6.20
   8   3  14   97.49    4.80
   8   3 -14   14.90    3.30
   9   3  14   26.02    3.70
  10   3  14  161.49    6.30
   0   4  14    1.31    2.50
   1   4  14  106.91    4.30
   1   4 -14  184.12    5.50
   2   4  14    1.02    2.50
   2   4 -14  438.64    9.50
   3   4  14   -0.09    2.60
   3   4 -14   96.77    4.10
   4   4  14  351.04    8.30
   4   4 -14   -0.71    2.50
   5   4  14  140.77    5.20
   5   4 -14  308.57    7.70
   6   4  14   15.75    3.20
   6   4 -14  547.13   11.60
   7   4  14  179.88    6.20
   7   4 -14    6.43    3.10
   8   4  14   30.41    3.80
   8   4 -14   10.55    3.30
   9   4 -14  165.95    6.30
  10   4  14  199.96    7.10
  10   4 -14   64.34    4.70
   0   5  14    7.64    2.90
   1   5  14    2.94    2.80
   1   5 -14  152.39    5.30
   2   5  14   99.46    4.40
   2   5 -14  195.19    5.90
   3   5  14   79.54    4.20
   3   5 -14   13.63    3.00
   4   5  14   77.23    4.20
   4   5 -14  244.04    6.90
   5   5  14  369.70    9.10
   5   5 -14    5.29    3.00
   6   5  14  176.00    6.20
   6   5 -14   99.95    4.80
   7   5  14  327.19    8.80
   7   5 -14   15.22    3.30
   8   5  14  419.88   10.40
   8   5 -14   52.40    4.30
   9   5  14   45.28    4.30
   9   5 -14   50.08    4.30
  10   5 -14   50.26    4.50
  11   5 -14   86.81    5.30
  15   5  14   71.60    5.30
   0   6  14    2.32    2.90
   1   6  14   44.22    3.70
   1   6 -14   34.05    3.50
   2   6  14   20.50    3.30
   2   6 -14    2.15    2.90
   3   6  14  108.21    5.00
   3   6 -14   46.65    3.90
   4   6  14    4.93    3.30
   4   6 -14   46.23    3.90
   5   6  14   74.42    4.60
   5   6 -14  267.76    7.70
   6   6  14   38.18    4.00
   6   6 -14   23.42    3.70
   7   6  14  152.15    6.10
   7   6 -14  165.42    6.30
   8   6  14  204.03    7.10
   8   6 -14  121.11    5.70
   9   6  14   41.65    4.30
   0   7  14    2.46    3.40
   1   7  14   84.65    4.80
   1   7 -14   12.60    3.60
   2   7  14    2.01    3.40
   2   7 -14   73.11    4.60
   3   7  14   35.84    4.10
   3   7 -14   42.62    4.10
   4   7  14   65.24    4.60
   4   7 -14    1.01    3.30
   5   7 -14   34.11    4.00
   6   7  14   83.49    5.10
   6   7 -14   11.73    3.70
  11   7 -14   57.61    5.00
   0   8  14    1.94    3.60
   1   8  14  130.40    5.90
   1   8 -14  140.34    6.00
   2   8  14  136.33    6.00
   2   8 -14  439.12   10.80
   3   8  14   37.69    4.40
   3   8 -14    2.74    3.70
   4   8  14  203.36    7.20
   4   8 -14  122.66    5.90
   6   8  14  267.58    8.40
   6   8 -14   44.96    4.50
   7   8  14   77.57    5.20
   7   8 -14  304.93    9.10
   8   8  14  120.05    6.10
   8   8 -14   93.86    5.60
   9   8  14   89.88    5.70
  10   8 -14   99.32    5.90
   1   9 -14   14.85    4.10
   3   9  14  123.64    6.10
   5   9  14  197.91    7.40
   5   9 -14   34.74    4.50
   6   9  14   49.32    4.90
   6   9 -14   65.98    5.20
   7   9  14   51.70    4.90
   8   9  14  216.65    8.00
   8   9 -14   49.70    5.00
   9   9 -14  110.34    6.10
   1  10  14   52.74    5.00
   1  10 -14   97.35    5.90
   2  10  14  103.54    6.00
   2  10 -14   64.26    5.30
   3  10  14  143.36    6.70
   3  10 -14   22.59    4.50
   4  10  14   41.04    4.90
   6  10 -14  131.08    6.60
   7  10  14  127.00    6.60
   7  10 -14   59.00    5.30
   1  11  14   33.11    5.00
   2  11  14   36.86    5.00
   2  11 -14   55.01    5.40
   3  11  14   37.82    5.10
   3  11 -14   22.76    4.80
   4  11  14   45.00    5.20
   4  11 -14   44.01    5.20
   6  11 -14   36.23    5.00
   7  11 -14  222.97    8.40
   8  11 -14   47.41    5.30
   9  11  14   97.02    6.20
   2  12  14   91.42    6.30
   3  12  14   77.36    6.00
   4  12 -14   38.86    5.30
   5  12 -14   48.16    5.60
   6  12 -14   52.31    5.70
   1  13  14   30.22    5.40
   1  13 -14   32.46    5.40
   2  13 -14   20.08    5.30
   4  13  14   42.04    6.40
   5  13  14   44.35    6.40
   0   1  15   41.93    3.20
   1   1  15    6.40    2.50
   1   1 -15  259.61    6.50
   2   1  15  352.41    7.90
   2   1 -15   69.93    3.60
   3   1  15   65.40    3.50
   3   1 -15   -0.02    2.30
   4   1  15  340.95    7.90
   4   1 -15   15.56    2.60
   5   1  15   20.96    2.80
   5   1 -15   99.25    4.10
   6   1  15  103.15    4.40
   6   1 -15   44.38    3.30
   7   1  15   82.26    4.30
   7   1 -15    7.09    2.80
   8   1  15   90.52    4.60
   8   1 -15   -5.52    2.70
   9   1  15   36.80    3.80
   9   1 -15   24.06    3.50
  14   1 -15   72.76    5.20
   0   2  15   64.02    4.10
   1   2  15  458.26    9.60
   1   2 -15 1244.29   21.50
   2   2  15  833.67   15.30
   2   2 -15  242.73    6.30
   3   2  15  565.51   11.30
   3   2 -15   51.65    3.20
   4   2  15  181.88    5.50
   4   2 -15    0.10    2.40
   5   2  15   83.55    4.00
   5   2 -15  301.63    7.40
   6   2  15  228.62    6.60
   6   2 -15    0.15    2.50
   7   2  15    5.23    2.90
   7   2 -15  235.06    6.80
   8   2  15   17.25    3.30
   8   2 -15    9.58    3.00
  10   2  15   57.17    4.40
  12   2 -15   75.85    5.10
  13   2 -15  390.06   10.70
   0   3  15  389.47    8.60
   1   3  15    3.59    2.50
   1   3 -15   96.35    4.10
   2   3  15  623.83   12.20
   2   3 -15   27.64    2.90
   3   3  15    6.83    2.60
   3   3 -15  121.89    4.50
   4   3  15  103.29    4.30
   4   3 -15   52.56    3.40
   5   3  15  148.96    5.20
   5   3 -15   58.54    3.60
   6   3  15  222.00    6.60
   6   3 -15   18.47    3.10
   7   3  15   26.72    3.60
   7   3 -15    6.08    3.00
   8   3  15   93.79    4.90
   8   3 -15   32.15    3.60
   9   3  15   63.77    4.50
  11   3  15  114.43    5.70
  12   3 -15   61.64    4.80
   0   4  15 1659.26   27.90
   1   4  15  515.20   10.70
   1   4 -15  189.79    5.70
   2   4  15    2.12    2.70
   2   4 -15  401.35    9.00
   3   4  15    0.65    2.60
   3   4 -15   56.66    3.50
   4   4  15  485.48   10.50
   4   4 -15  321.61    7.90
   5   4  15  324.52    8.20
   5   4 -15   -0.41    2.70
   6   4  15  112.04    5.00
   6   4 -15    2.00    2.90
   7   4  15  183.58    6.40
   7   4 -15    1.37    3.00
   8   4  15   19.55    3.60
   8   4 -15  149.06    5.90
  12   4 -15  289.56    9.00
   0   5  15    1.14    2.70
   1   5  15   24.54    3.20
   1   5 -15    6.42    2.80
   2   5  15  136.17    5.10
   2   5 -15    7.70    2.90
   3   5  15   73.49    4.10
   3   5 -15    3.02    2.80
   4   5  15   47.17    3.80
   4   5 -15   98.33    4.60
   5   5  15  107.70    5.00
   5   5 -15   95.23    4.70
   6   5  15  256.82    7.50
   6   5 -15  114.55    5.10
   7   5  15   51.25    4.20
   7   5 -15   24.00    3.60
  12   5  15  133.98    6.40
   0   6  15 1248.75   22.30
   1   6  15  362.71    8.90
   1   6 -15  511.68   11.20
   2   6  15   16.66    3.40
   2   6 -15   23.05    3.50
   3   6  15    2.71    3.20
   3   6 -15    8.57    3.20
   4   6  15    8.90    3.40
   4   6 -15   21.50    3.60
   5   6  15  459.59   10.80
   5   6 -15   15.70    3.50
   6   6  15  102.92    5.20
   6   6 -15    0.51    3.40
   7   6  15   26.72    3.90
   8   6 -15   41.54    4.20
   9   6 -15  257.07    8.20
  11   6 -15  238.01    8.20
  13   6  15   96.81    6.00
   0   7  15  262.76    7.70
   1   7  15   67.01    4.60
   1   7 -15    2.30    3.40
   2   7  15   14.45    3.60
   2   7 -15   12.52    3.60
   3   7  15   12.52    3.60
   3   7 -15   21.20    3.80
   4   7  15  446.51   10.80
   4   7 -15  195.25    6.80
   5   7 -15  172.21    6.50
   6   7  15  124.14    5.80
   6   7 -15   32.75    4.20
   7   7  15  226.93    7.70
   7   7 -15  254.16    8.10
   9   7  15  151.39    6.60
  11   7 -15   73.63    5.30
  14   7  15   63.12    5.10
   0   8  15  122.36    5.80
   1   8  15   25.94    4.10
   1   8 -15  305.63    8.70
   2   8  15  157.04    6.40
   2   8 -15   41.90    4.40
   3   8 -15   34.68    4.30
   4   8  15   22.21    4.10
   4   8 -15   51.78    4.60
   6   8  15   70.95    5.00
   8   8 -15   37.14    4.60
   9   8  15   86.48    5.60
  12   8  15   96.44    5.90
   0   9  15   35.52    4.50
   1   9  15   90.52    5.50
   1   9 -15   43.25    4.60
   2   9 -15   41.99    4.60
   3   9  15   61.07    5.00
   3   9 -15  123.61    6.10
   4   9  15  113.89    6.00
   5   9 -15   26.24    4.40
   6   9 -15  304.73    9.30
  10   9  15   82.75    5.70
   0  10  15   86.60    5.70
   1  10  15   69.75    5.40
   2  10  15   63.93    5.20
   2  10 -15  237.26    8.30
   3  10 -15   49.53    5.00
   4  10 -15   38.50    4.80
   5  10 -15   38.98    4.90
   6  10 -15   36.74    4.90
   7  10 -15   56.09    5.30
   8  10  15   60.93    5.40
   8  10 -15   43.66    5.10
   9  10 -15   87.11    5.90
  10  10  15   68.14    5.70
   1  11 -15   79.92    5.90
   2  11  15  225.25    8.40
   4  11  15   77.78    5.80
   5  11  15   84.94    5.90
   5  11 -15   62.12    5.50
   6  11  15   56.55    5.40
   1  12 -15   38.67    5.30
   3  12  15   74.65    6.00
   3  12 -15  168.11    7.70
   4  12  15   52.34    5.70
   4  12 -15   39.94    5.40
   5  12  15   59.77    5.70
   5  12 -15   75.27    6.10
   9  12  15   52.55    5.40
  10  12  15   86.42    5.80
   4  14  15   63.15    6.10
   0   0  16 1049.30   18.50
   1   0  16  139.63    4.60
   1   0 -16  794.63   14.60
   2   0  16 1516.51   25.50
   2   0 -16  127.62    4.40
   3   0  16 1659.44   27.80
   3   0 -16  245.54    6.30
   4   0  16  178.94    5.40
   4   0 -16   -1.35    2.30
   5   0  16   12.98    2.70
   5   0 -16   15.72    2.70
   6   0  16   76.23    4.10
   6   0 -16   -3.29    2.40
   7   0  16    2.49    2.80
   7   0 -16    2.52    2.80
   8   0  16  143.09    5.60
   8   0 -16   69.32    4.20
   9   0  16  189.42    6.60
   9   0 -16  233.48    7.30
  10   0 -16   84.25    4.90
  11   0 -16  411.10   10.60
  12   0  16  129.76    6.10
  12   0 -16  780.02   16.60
  14   0 -16  231.67    8.20
  15   0  16  120.03    6.20
   0   1  16  190.62    5.40
   1   1  16  858.75   15.60
   1   1 -16   35.09    2.90
   2   1  16  153.37    4.90
   2   1 -16  158.83    4.90
   3   1  16  370.48    8.30
   3   1 -16   33.38    2.90
   4   1  16  189.63    5.60
   4   1 -16  175.83    5.30
   5   1  16   16.86    2.80
   5   1 -16   22.05    2.80
   6   1  16   -0.92    2.60
   6   1 -16   59.01    3.60
   7   1  16   12.40    3.10
   7   1 -16   98.72    4.50
   8   1  16   44.20    3.90
   8   1 -16    3.97    2.90
   9   1  16  272.20    8.00
  11   1  16   68.75    4.80
  12   1  16   80.62    5.20
   0   2  16  303.91    7.20
   1   2  16 1071.04   18.90
   1   2 -16   63.49    3.50
   2   2  16  729.70   13.80
   2   2 -16   36.57    3.00
   3   2  16  559.62   11.30
   3   2 -16   32.62    3.00
   4   2  16  198.40    5.80
   4   2 -16   14.39    2.70
   5   2  16   11.36    2.80
   5   2 -16    0.40    2.50
   6   2  16   -0.40    2.70
   6   2 -16    1.27    2.60
   7   2  16   95.18    4.70
   7   2 -16   -0.40    2.70
   8   2  16   30.41    3.60
   8   2 -16   47.79    3.80
   9   2 -16  108.78    5.20
  10   2  16   52.06    4.40
  10   2 -16  210.28    7.20
  11   2 -16  391.40   10.30
  12   2 -16   62.44    4.80
   0   3  16    7.93    2.60
   1   3  16   56.09    3.40
   1   3 -16   83.21    3.90
   2   3  16   21.17    2.90
   2   3 -16   33.14    3.10
   3   3  16  186.05    5.70
   3   3 -16  170.71    5.40
   4   3  16   35.61    3.30
   4   3 -16   44.30    3.40
   5   3  16   27.92    3.30
   5   3 -16  148.56    5.20
   6   3  16   44.83    3.80
   6   3 -16    2.05    2.80
   7   3  16  110.72    5.10
   7   3 -16   -0.06    3.00
   8   3  16   24.78    3.60
   8   3 -16   23.30    3.60
   9   3  16   81.79    4.90
   9   3 -16   57.69    4.40
   0   4  16   59.59    3.60
   1   4  16  720.09   13.90
   1   4 -16   11.09    2.70
   2   4  16  286.68    7.30
   2   4 -16   61.85    3.70
   3   4  16   -0.01    2.60
   3   4 -16  267.20    7.00
   4   4  16  146.45    5.30
   4   4 -16   24.51    3.10
   5   4  16  246.17    7.10
   5   4 -16   76.72    4.20
   6   4  16    1.24    3.10
   6   4 -16   29.41    3.50
   7   4  16    4.83    3.20
   7   4 -16   47.04    3.90
  10   4  16   53.12    4.50
  10   4 -16  494.21   11.90
  13   4  16  110.86    6.00
  13   4 -16  181.07    7.30
  14   4  16   67.86    5.20
   0   5  16   18.83    3.10
   1   5  16  437.46    9.80
   1   5 -16  170.98    5.60
   2   5  16   28.36    3.30
   2   5 -16   45.78    3.60
   3   5  16   50.50    3.80
   3   5 -16   79.58    4.20
   4   5  16  161.27    5.80
   4   5 -16   86.57    4.50
   5   5  16   74.80    4.50
   5   5 -16    6.71    3.10
   6   5  16    1.49    3.20
   6   5 -16  193.98    6.50
   7   5  16   33.98    3.90
   8   5 -16   22.57    3.80
  10   5  16   50.77    4.60
  11   5  16   71.40    5.10
   0   6  16   93.51    4.80
   1   6  16    2.31    3.20
   1   6 -16   24.22    3.60
   2   6  16   26.96    3.60
   2   6 -16   66.71    4.30
   3   6  16   81.58    4.70
   3   6 -16   63.47    4.30
   4   6  16    8.12    3.40
   4   6 -16   28.68    3.80
   5   6  16   15.62    3.60
   5   6 -16    0.37    3.20
   6   6  16  135.17    5.80
   6   6 -16  115.19    5.50
   7   6  16   42.23    4.20
   9   6 -16  118.57    5.80
  12   6  16   88.83    5.70
   0   7  16    8.20    3.50
   1   7  16    3.91    3.40
   1   7 -16    4.25    3.50
   2   7  16   10.03    3.50
   2   7 -16   22.22    3.80
   3   7  16   17.83    3.80
   3   7 -16    5.62    3.50
   4   7 -16    7.64    3.60
   5   7  16  100.23    5.40
   5   7 -16   24.89    4.00
   6   7 -16   17.62    3.90
   7   7  16   74.48    5.00
  13   7  16  109.27    6.10
   0   8  16    4.71    3.70
   1   8  16  204.92    7.20
   1   8 -16  355.52    9.60
   2   8  16   23.78    4.00
   2   8 -16   59.07    4.70
   4   8 -16  128.49    6.00
   6   8  16   67.80    5.00
   6   8 -16   56.79    4.80
   7   8  16  164.31    6.90
   7   8 -16   45.94    4.70
   8   8 -16  117.00    6.10
  10   8 -16  174.99    7.30
  12   8  16   66.29    5.30
   1   9  16   95.65    5.60
   1   9 -16   68.83    5.10
   3   9  16   24.87    4.30
   4   9 -16   23.70    4.30
   5   9  16   89.24    5.60
   8   9 -16   64.97    5.30
   0  10  16   21.52    4.40
   1  10 -16   25.19    4.50
   2  10 -16   75.97    5.50
   3  10  16  117.74    6.30
   3  10 -16   94.80    5.90
   5  10  16   38.16    4.90
   7  10 -16  142.32    6.90
   2  11 -16   40.14    5.20
   5  11  16   75.20    5.80
   5  11 -16   45.39    5.20
  11  11  16   60.12    5.30
   1  12 -16   75.17    6.00
   2  12  16   99.28    6.40
   2  12 -16   56.02    5.60
   3  12 -16   68.84    5.90
   6  14  16   49.45    5.50
   0   1  17   17.24    2.60
   1   1  17   57.41    3.30
   1   1 -17   -3.04    2.20
   2   1  17  274.93    6.80
   2   1 -17   91.24    3.90
   3   1  17    6.73    2.50
   3   1 -17  119.90    4.40
   4   1  17    3.59    2.50
   4   1 -17    2.21    2.40
   5   1  17   13.69    2.80
   5   1 -17   -0.52    2.40
   6   1  17    3.80    2.80
   6   1 -17   59.81    3.80
   7   1  17    8.34    3.10
   7   1 -17   13.90    3.10
   8   1  17   70.63    4.40
   8   1 -17   90.47    4.70
   9   1 -17   34.71    3.80
  10   1  17  458.00   11.30
  11   1  17  119.94    5.80
  16   1  17   59.70    4.80
   0   2  17   11.84    2.60
   1   2  17   86.26    3.90
   1   2 -17    8.02    2.50
   2   2  17    2.08    2.50
   2   2 -17  469.29    9.90
   3   2  17   23.98    2.90
   3   2 -17    1.07    2.40
   4   2  17  767.49   14.70
   4   2 -17  236.54    6.50
   5   2  17   90.88    4.30
   5   2 -17  165.01    5.40
   6   2  17  192.96    6.20
   6   2 -17   74.64    4.10
   7   2  17  173.98    6.10
   7   2 -17    2.35    2.90
   8   2 -17   88.51    4.70
   9   2  17  237.56    7.50
  11   2 -17   86.51    5.20
  12   2  17  101.07    5.70
  12   2 -17  161.66    6.70
  13   2 -17  232.64    8.10
   0   3  17   80.38    3.90
   1   3  17    2.52    2.60
   1   3 -17   -0.17    2.40
   2   3  17   59.06    3.60
   2   3 -17    3.30    2.60
   3   3  17  141.08    5.10
   3   3 -17   65.79    3.70
   4   3  17   18.85    3.00
   4   3 -17   84.92    4.10
   5   3  17    0.03    2.90
   5   3 -17   63.93    3.90
   6   3  17    4.61    3.20
   6   3 -17  151.86    5.60
   7   3  17   72.59    4.40
   7   3 -17    2.88    3.00
   8   3  17  127.23    5.60
   9   3  17  175.43    6.60
   9   3 -17   35.71    4.00
  11   3  17  115.50    5.80
  12   3  17  105.01    5.80
  15   3  17   64.45    5.00
   0   4  17   21.23    3.00
   1   4  17   -0.96    2.60
   1   4 -17   91.62    4.20
   2   4  17   35.44    3.30
   2   4 -17   12.93    2.80
   3   4  17  305.09    7.80
   3   4 -17   64.81    3.80
   4   4  17   75.38    4.20
   4   4 -17   24.90    3.20
   5   4  17   78.53    4.50
   5   4 -17    8.87    3.10
   6   4  17  243.80    7.30
   6   4 -17   43.17    3.80
   7   4 -17  125.62    5.40
   8   4 -17   65.78    4.50
   9   4 -17  131.47    5.90
  10   4 -17   96.00    5.40
  12   4 -17   73.79    5.20
  13   4 -17   64.30    5.10
   0   5  17   10.45    3.00
   1   5  17   51.06    3.80
   1   5 -17    7.97    2.90
   2   5  17    1.63    2.90
   2   5 -17  265.97    7.30
   3   5  17   15.38    3.30
   3   5 -17   -0.13    2.90
   4   5  17   71.04    4.40
   4   5 -17    3.92    3.00
   5   5  17  180.66    6.30
   5   5 -17   34.26    3.70
   6   5  17   18.16    3.60
   6   5 -17   11.47    3.40
   7   5  17   50.54    4.30
   7   5 -17   18.81    3.60
   8   5  17  251.79    7.90
   9   5 -17   63.28    4.70
  10   5 -17   44.25    4.50
   0   6  17   55.57    4.20
   1   6  17   87.56    4.80
   1   6 -17   62.81    4.30
   2   6  17  198.27    6.60
   2   6 -17   -0.89    3.20
   3   6  17  294.30    8.20
   3   6 -17   12.97    3.50
   4   6  17   14.89    3.50
   4   6 -17  297.24    8.30
   5   6  17  200.65    6.90
   5   6 -17   12.77    3.50
   6   6  17  280.37    8.30
   7   6 -17  191.31    6.90
   8   6 -17   79.57    5.00
   9   6 -17  209.39    7.50
  11   6 -17   96.23    5.70
   0   7  17   76.85    4.80
   1   7  17    4.17    3.50
   1   7 -17  125.87    5.60
   2   7  17   15.86    3.70
   2   7 -17   23.28    3.80
   3   7 -17   22.07    3.90
   4   7 -17  162.04    6.40
   6   7  17  270.12    8.40
   7   7  17  222.03    7.70
  10   7 -17   68.55    5.20
  12   7  17   66.46    5.30
   0   8  17   96.30    5.40
   1   8  17   43.11    4.40
   1   8 -17    6.91    3.70
   2   8 -17   43.01    4.50
   3   8  17   16.57    3.90
   3   8 -17   64.75    4.90
   4   8  17  323.90    9.30
   5   8 -17  156.64    6.60
   7   8  17  207.77    7.70
   8   8 -17  211.23    7.80
   0   9  17   80.03    5.30
   3   9 -17   48.96    4.80
   4   9 -17   32.37    4.50
   5   9 -17   38.01    4.70
   6   9  17  240.67    8.40
   7   9  17  194.14    7.60
   0  10  17   53.78    5.10
   1  10 -17   33.73    4.70
   2  10  17   29.17    4.60
   2  10 -17   88.35    5.80
   5  10  17   40.99    5.00
   6  10 -17   70.65    5.60
   8  10  17  126.05    6.60
  11  10  17   69.76    5.50
   1  11  17   34.78    4.90
   2  11 -17   48.11    5.20
   5  11  17   53.29    5.40
   8  11  17  101.10    6.30
  10  11  17   70.23    5.50
   3  12 -17   37.41    5.40
   4  12 -17   42.70    5.50
   6  12  17   49.69    5.70
   9  12  17  104.16    6.00
   6  13  17   40.02    5.20
   0   0  18   30.03    2.90
   1   0  18    6.35    2.40
   1   0 -18  457.01    9.70
   2   0  18   21.43    2.80
   2   0 -18    0.10    2.30
   3   0  18   26.39    3.00
   3   0 -18   -0.36    2.30
   4   0  18   76.31    3.90
   4   0 -18  295.87    7.40
   5   0  18  289.60    7.60
   5   0 -18  244.72    6.70
   6   0  18    3.44    2.90
   6   0 -18  126.36    5.00
   7   0  18   24.65    3.50
   7   0 -18   12.58    3.10
   8   0  18  490.80   11.40
   8   0 -18   -1.62    3.00
   9   0 -18  123.97    5.60
  10   0 -18  164.54    6.50
  11   0  18  184.63    7.00
  11   0 -18  373.01   10.10
  13   0  18   72.66    5.20
   0   1  18    9.47    2.50
   1   1  18   11.67    2.60
   1   1 -18    6.10    2.40
   2   1  18    9.22    2.50
   2   1 -18  355.66    8.20
   3   1  18   53.74    3.50
   3   1 -18   83.50    3.90
   4   1  18   96.76    4.30
   4   1 -18   96.56    4.20
   5   1  18    1.48    2.70
   5   1 -18  402.25    9.20
   6   1  18   66.12    4.10
   6   1 -18   22.82    3.20
   7   1  18    0.73    3.00
   7   1 -18  210.50    6.60
   9   1  18  129.63    5.70
  10   1  18   48.07    4.40
   0   2  18   74.82    3.80
   1   2  18    6.55    2.60
   1   2 -18   -0.54    2.40
   2   2  18    4.11    2.50
   2   2 -18  144.40    4.90
   3   2  18   37.39    3.20
   3   2 -18   63.29    3.60
   4   2  18   18.48    3.00
   4   2 -18   14.50    2.80
   5   2  18    0.88    2.70
   5   2 -18  170.56    5.70
   6   2  18   -1.50    2.90
   6   2 -18   20.21    3.20
   7   2  18  124.96    5.40
   7   2 -18   28.18    3.50
   9   2  18   37.75    4.10
   9   2 -18   40.09    4.00
  10   2  18   79.36    5.00
  11   2 -18   54.82    4.60
  12   2 -18   80.87    5.30
   0   3  18   56.56    3.60
   1   3  18   18.11    2.90
   1   3 -18   52.47    3.50
   2   3  18   -1.99    2.60
   2   3 -18  126.67    4.80
   3   3  18   94.90    4.40
   3   3 -18   52.36    3.60
   4   3  18  422.83    9.80
   4   3 -18   24.27    3.20
   5   3  18    6.56    3.10
   5   3 -18   62.38    4.00
   6   3  18   43.93    3.80
   6   3 -18   43.01    3.80
   7   3 -18  128.54    5.40
   8   3  18   91.09    5.00
   8   3 -18  139.91    5.80
   9   3  18  174.88    6.60
  10   3  18   76.53    5.00
  12   3  18  188.90    7.30
  15   3  18   67.94    5.00
   0   4  18   15.02    2.90
   1   4  18   46.71    3.50
   1   4 -18   -3.01    2.60
   2   4  18  241.11    6.80
   2   4 -18    3.26    2.70
   3   4  18  124.62    5.10
   3   4 -18  141.80    5.30
   4   4  18    4.20    3.00
   4   4 -18    6.67    3.00
   5   4  18  189.63    6.40
   5   4 -18   73.28    4.40
   6   4  18   99.69    5.00
   6   4 -18   40.34    3.80
   7   4  18   24.20    3.70
   7   4 -18  111.31    5.30
   9   4  18   92.14    5.30
   9   4 -18   65.30    4.70
  11   4 -18   51.76    4.70
   0   5  18   89.80    4.50
   1   5  18   80.11    4.40
   1   5 -18    1.01    2.90
   2   5  18  126.44    5.20
   2   5 -18  204.17    6.50
   3   5  18  119.39    5.20
   3   5 -18  401.75    9.70
   4   5  18    0.83    3.10
   4   5 -18   99.02    4.80
   5   5  18  156.38    6.00
   5   5 -18  240.71    7.30
   7   5  18  147.65    6.10
   8   5  18  201.81    7.20
   8   5 -18  143.15    6.10
   9   5  18   58.21    4.70
   9   5 -18  118.95    5.80
  10   5 -18   56.86    4.80
  13   5  18  293.60    9.30
  14   5  18  176.65    7.20
   0   6  18    1.17    3.30
   1   6  18   13.49    3.50
   1   6 -18   11.54    3.50
   2   6  18    2.12    3.20
   2   6 -18   -0.73    3.20
   3   6  18   10.56    3.40
   3   6 -18   21.08    3.60
   4   6  18   17.09    3.60
   4   6 -18    2.26    3.30
   5   6  18   38.55    4.10
   8   6  18   55.74    4.70
  11   6  18   54.37    4.90
   0   7  18    1.83    3.50
   1   7  18   38.14    4.20
   1   7 -18   57.13    4.50
   2   7 -18   36.03    4.10
   3   7 -18   29.83    4.00
   5   7  18   52.15    4.60
   6   7  18   43.16    4.40
   7   7  18  108.33    5.70
   8   7  18   56.44    4.90
   9   7 -18   99.08    5.70
  13   7  18   96.32    5.80
  14   7  18   63.34    5.00
   0   8  18   62.44    4.80
   1   8  18   19.60    4.00
   2   8  18   56.48    4.70
   3   8  18  101.59    5.60
   3   8 -18   25.33    4.10
   4   8 -18   40.52    4.50
   5   8  18   43.76    4.60
   7   8 -18  143.38    6.60
   9   8 -18   97.41    5.90
   0   9  18   48.46    4.80
   1   9  18   23.01    4.30
   2   9 -18   75.92    5.30
   3   9 -18   70.93    5.30
   4   9  18   47.79    4.80
   5   9 -18   63.20    5.20
   7   9  18   46.26    4.90
   8   9  18   46.52    5.00
  12   9  18   53.28    4.80
   3  10  18   77.97    5.60
   6  10  18   43.54    5.00
   1  11  18   70.77    5.60
   1  11 -18   31.87    4.90
   2  11 -18   48.41    5.20
   7  11  18  119.55    6.80
   8  11  18  105.10    6.30
  10  11  18   52.01    5.10
   0  12  18   46.61    5.50
   4  13  18   45.23    5.40
   6  13  18   57.03    5.50
   4  14  18   19.25    5.30
   0   1  19   26.77    2.90
   1   1  19   17.11    2.80
   1   1 -19   16.80    2.70
   2   1  19   19.69    2.80
   2   1 -19   16.26    2.70
   3   1  19   95.56    4.30
   3   1 -19   70.08    3.80
   4   1  19  127.18    4.90
   4   1 -19   -0.48    2.50
   5   1  19  435.24   10.00
   5   1 -19  195.02    6.10
   6   1  19   45.69    3.80
   6   1 -19  848.59   16.40
   7   1 -19  273.38    7.70
   8   1 -19   30.44    3.70
   9   1 -19   45.96    4.20
  10   1  19  163.04    6.60
  11   1  19  313.15    9.30
  11   1 -19   70.48    4.90
  12   1 -19   61.77    4.90
  13   1  19  172.95    7.10
  15   1  19   64.41    5.00
   0   2  19  356.78    8.30
   1   2  19    1.19    2.50
   1   2 -19    1.28    2.50
   2   2  19   47.71    3.40
   2   2 -19    6.21    2.60
   3   2  19    0.66    2.60
   3   2 -19  218.85    6.30
   4   2  19   37.84    3.50
   4   2 -19    1.12    2.70
   5   2  19   13.35    3.20
   5   2 -19    9.88    2.90
   6   2  19   29.86    3.60
   6   2 -19  192.79    6.30
   7   2 -19  236.33    7.20
   8   2 -19  223.81    7.20
   9   2 -19   99.04    5.20
  10   2 -19  486.75   11.80
  11   2 -19  120.55    5.90
  15   2  19   54.67    4.70
   0   3  19   -2.33    2.60
   1   3  19   51.30    3.60
   1   3 -19  115.37    4.60
   2   3  19   72.58    4.00
   2   3 -19    2.00    2.60
   3   3  19   79.88    4.30
   3   3 -19   25.15    3.20
   4   3  19    1.02    2.90
   4   3 -19  341.88    8.50
   5   3  19   15.79    3.40
   5   3 -19  215.06    6.70
   6   3  19  109.58    5.10
   6   3 -19   -1.80    3.00
   7   3  19  103.90    5.20
   7   3 -19  149.91    5.90
   8   3 -19  242.36    7.60
   9   3  19  105.92    5.50
  11   3  19   60.57    4.90
  14   3  19  224.75    8.00
  15   3  19  104.67    5.70
   0   4  19   13.21    3.00
   1   4  19   91.60    4.50
   1   4 -19  184.74    6.00
   2   4  19   29.63    3.40
   2   4 -19  205.66    6.40
   3   4  19   97.52    4.70
   3   4 -19   -1.04    2.80
   4   4  19   39.92    3.80
   4   4 -19   86.11    4.60
   5   4  19    3.75    3.20
   5   4 -19   52.67    4.00
   6   4  19   38.03    4.00
   6   4 -19  117.81    5.30
   7   4  19   85.57    5.00
   8   4 -19  345.78    9.40
   9   4 -19   53.47    4.50
  11   4 -19   65.28    5.00
  15   4  19   52.49    4.60
   0   5  19   19.72    3.40
   1   5  19   34.01    3.70
   1   5 -19   34.66    3.70
   2   5  19    2.42    3.10
   2   5 -19   -3.01    3.00
   3   5  19   36.55    3.80
   3   5 -19   25.78    3.50
   4   5  19   90.58    4.90
   4   5 -19  153.88    5.90
   5   5  19   44.05    4.10
   5   5 -19    2.59    3.20
  10   5  19   53.79    4.80
  11   5  19  163.01    7.00
   0   6  19    6.66    3.30
   1   6  19   61.18    4.30
   1   6 -19   95.27    5.00
   2   6  19   26.92    3.80
   2   6 -19   27.43    3.70
   3   6 -19   37.76    4.00
   4   6 -19   39.72    4.10
   5   6  19  104.61    5.40
   5   6 -19   33.69    4.00
   7   6  19   51.89    4.60
   7   6 -19  125.97    5.90
   8   6  19  109.88    5.80
   8   6 -19  389.88   10.40
   0   7  19   70.95    4.80
   1   7 -19   25.80    4.00
   2   7  19   74.37    4.90
   2   7 -19  173.33    6.60
   3   7  19  178.43    6.80
   3   7 -19  194.21    7.00
   4   7 -19   43.07    4.40
   6   7  19  183.20    7.00
   8   7 -19   59.82    4.90
   9   7  19  222.82    8.00
  10   7  19  183.38    7.40
  10   7 -19   96.75    5.80
  12   7  19  133.39    6.50
  13   7  19   70.53    5.20
   3   8  19   52.42    4.70
   4   8  19   33.92    4.40
   6   8  19  125.90    6.20
   6   8 -19   45.66    4.70
   7   8  19   46.75    4.80
   7   8 -19   61.07    5.10
   0   9  19   45.00    4.80
   1   9  19   60.45    5.10
   1   9 -19  173.13    7.10
   2   9  19   51.38    4.90
   2   9 -19   40.18    4.70
   5   9  19   49.11    4.90
   7   9  19   90.87    5.80
   7   9 -19   96.92    5.90
   8   9  19   65.19    5.40
   8   9 -19   51.97    5.10
   9   9  19  169.63    7.40
  11   9  19  111.07    6.10
   1  10 -19   63.72    5.30
   2  10 -19   51.60    5.10
   4  10  19   96.09    6.00
   5  10  19   61.90    5.40
   6  10 -19   69.15    5.60
   2  11 -19   36.51    5.00
  10  11  19   77.81    5.60
   4  12  19   58.06    5.90
   0   0  20  124.85    4.70
   1   0  20  182.35    5.60
   1   0 -20   24.88    2.90
   2   0  20  235.31    6.50
   2   0 -20   66.80    3.70
   3   0  20    5.58    2.80
   3   0 -20  131.16    4.90
   4   0  20  247.50    7.00
   4   0 -20  265.03    7.20
   5   0  20  955.41   18.10
   5   0 -20  296.74    7.80
   6   0  20   54.34    4.10
   6   0 -20  318.71    8.30
   7   0 -20  248.24    7.40
   9   0  20  297.13    8.70
   9   0 -20  171.22    6.50
  10   0  20   51.85    4.60
  10   0 -20  424.44   10.90
  11   0 -20  302.38    9.10
   0   1  20   41.60    3.30
   1   1  20  153.12    5.20
   1   1 -20   27.81    3.00
   2   1  20    7.90    2.70
   2   1 -20  146.03    5.10
   3   1  20    5.28    2.80
   3   1 -20   37.57    3.30
   4   1  20   10.06    3.00
   4   1 -20   26.73    3.20
   5   1  20   23.13    3.30
   5   1 -20   27.67    3.30
   6   1  20  245.51    7.30
   6   1 -20  115.13    5.00
   7   1 -20   58.81    4.20
   8   1  20   85.52    4.90
   9   1  20   44.59    4.30
  10   1 -20  100.54    5.40
  11   1  20   55.34    4.70
  12   1  20  108.60    5.90
   0   2  20    7.46    2.70
   1   2  20    0.28    2.60
   1   2 -20   53.25    3.50
   2   2  20   11.70    2.90
   2   2 -20   55.63    3.60
   3   2  20  269.87    7.40
   3   2 -20   28.43    3.20
   4   2  20  166.06    5.80
   4   2 -20  145.83    5.40
   5   2  20   30.23    3.60
   5   2 -20  214.84    6.60
   6   2  20  100.26    4.90
   6   2 -20    0.96    2.90
   7   2 -20   22.78    3.60
   8   2  20   71.49    4.70
   9   2  20   47.28    4.30
   9   2 -20  156.12    6.30
  10   2  20   68.22    4.90
   0   3  20    0.09    2.70
   1   3  20    5.85    2.90
   1   3 -20   -4.08    2.60
   2   3  20   18.04    3.20
   2   3 -20    5.03    2.90
   3   3  20   90.09    4.60
   3   3 -20   -3.09    2.70
   4   3  20  120.55    5.20
   4   3 -20  276.39    7.70
   5   3  20   49.29    4.00
   5   3 -20  309.56    8.30
   6   3  20   99.10    5.00
   6   3 -20   64.60    4.30
   7   3  20   77.76    4.80
  10   3 -20  149.58    6.40
  11   3  20  170.90    7.00
  11   3 -20  114.77    5.90
  12   3  20  353.17   10.20
   0   4  20   23.01    3.30
   1   4  20   84.09    4.50
   1   4 -20    7.89    3.00
   2   4  20   20.53    3.40
   2   4 -20   43.29    3.80
   3   4  20  129.79    5.40
   3   4 -20   51.27    4.00
   4   4  20   56.81    4.20
   4   4 -20   20.48    3.40
   5   4  20   56.22    4.30
   5   4 -20   42.82    3.90
   6   4  20   50.56    4.30
   7   4 -20   96.04    5.20
   8   4  20  213.42    7.40
   8   4 -20   51.65    4.40
   9   4 -20  304.99    9.00
  11   4  20   97.68    5.70
  11   4 -20   61.94    5.00
  12   4 -20   95.69    5.70
   0   5  20   35.87    3.70
   1   5  20    3.18    3.10
   1   5 -20   92.81    4.80
   2   5  20   43.50    3.90
   2   5 -20   34.76    3.70
   3   5  20   49.59    4.10
   3   5 -20   99.25    4.90
   4   5 -20   95.60    4.90
   5   5 -20  272.73    8.10
   6   5 -20   47.24    4.30
   7   5  20   91.21    5.20
   7   5 -20   50.25    4.40
   8   5  20  226.83    7.80
   9   5 -20  303.14    9.10
  10   5  20  224.66    8.00
  12   5 -20  107.54    6.00
  13   5  20  242.66    8.40
   0   6  20  189.50    6.60
   1   6  20  102.54    5.20
   1   6 -20  135.57    5.70
   2   6  20  216.22    7.20
   2   6 -20   34.90    4.00
   3   6 -20   12.38    3.50
   4   6  20   37.66    4.10
   4   6 -20  101.24    5.30
   5   6 -20   34.21    4.10
   6   6  20   47.48    4.40
   7   6 -20  120.43    5.80
   8   6  20   50.15    4.70
   0   7  20   49.55    4.50
   1   7  20   21.21    3.90
   2   7  20   92.26    5.30
   3   7 -20   97.66    5.40
   4   7 -20   70.44    4.90
   6   7 -20  131.92    6.20
   7   7 -20   42.49    4.50
   8   7  20   62.95    5.10
   8   7 -20   59.37    4.90
  10   7  20  102.60    6.00
  13   7  20   55.65    4.80
   0   8  20  218.66    7.60
   1   8  20  175.80    6.90
   1   8 -20  208.69    7.40
   2   8  20   33.23    4.30
   3   8 -20   67.19    5.00
   4   8 -20   32.19    4.40
   6   8  20   58.14    5.00
   6   8 -20  148.16    6.70
   7   8 -20  134.51    6.50
   8   8  20   52.24    5.00
   9   8 -20   69.18    5.40
  12   8  20   58.93    5.00
   8   9  20   67.31    5.40
  10   9  20   68.20    5.30
  12   9  20   45.13    4.60
   0  10  20  105.39    6.20
   1  10  20   56.00    5.20
   1  10 -20   55.37    5.20
   5  10  20  116.29    6.40
   5  10 -20  143.29    6.90
   6  10 -20  108.36    6.30
   7  10  20   48.18    5.20
   0  11  20   97.98    6.20
   1  11 -20   54.23    5.40
   8  11  20   76.70    5.80
   6  13  20   31.86    5.20
   0   1  21  292.27    7.50
   1   1  21   33.30    3.30
   1   1 -21   21.47    3.00
   2   1  21   47.99    3.60
   2   1 -21  139.83    5.10
   3   1  21   13.37    3.00
   3   1 -21  893.04   16.90
   4   1  21    4.65    2.90
   4   1 -21   89.39    4.40
   5   1  21  115.62    5.10
   5   1 -21   -0.19    2.80
   6   1 -21   41.35    3.80
   7   1  21  257.24    7.80
   7   1 -21  209.09    6.90
   8   1 -21  288.61    8.40
   9   1 -21  424.12   10.80
  10   1  21  134.69    6.20
  10   1 -21  177.05    6.90
  13   1  21   67.77    5.20
  14   1  21   87.01    5.50
   0   2  21   55.72    3.70
   1   2  21  127.67    5.00
   1   2 -21  101.03    4.50
   2   2  21   -1.04    2.70
   2   2 -21   56.71    3.80
   3   2  21   97.52    4.70
   3   2 -21   64.02    4.00
   4   2  21  108.67    5.00
   4   2 -21  309.71    8.10
   5   2  21  223.85    7.00
   5   2 -21    4.05    2.90
   6   2  21  209.26    6.90
   6   2 -21  254.21    7.50
   8   2  21   38.81    4.10
   9   2 -21  117.06    5.70
  11   2 -21   56.41    4.80
  12   2 -21   94.99    5.70
   0   3  21  141.53    5.40
   1   3  21   -0.77    2.80
   1   3 -21  759.05   15.00
   2   3  21  202.83    6.50
   2   3 -21  124.97    5.20
   3   3  21    2.01    3.10
   3   3 -21   27.50    3.60
   4   3  21   93.75    4.80
   4   3 -21  201.85    6.50
   5   3 -21    2.90    3.10
   6   3  21   29.72    3.80
   6   3 -21   30.30    3.80
   7   3  21  191.93    6.80
   7   3 -21   84.05    4.90
   8   3  21   93.89    5.20
   8   3 -21  262.92    8.10
   9   3  21  178.99    6.90
   9   3 -21   55.15    4.50
  10   3 -21  113.83    5.80
  11   3 -21   66.87    5.00
  15   3  21   58.95    4.70
   0   4  21   -0.70    3.00
   1   4  21   66.60    4.30
   1   4 -21   17.75    3.40
   2   4  21  281.14    7.90
   2   4 -21  180.78    6.20
   3   4  21   44.93    4.00
   3   4 -21  376.28    9.40
   4   4  21   35.99    3.90
   4   4 -21   76.27    4.50
   5   4  21   52.42    4.30
   6   4  21  170.42    6.50
   7   4  21  246.17    7.90
   7   4 -21  102.85    5.40
   8   4 -21  173.22    6.70
   0   5  21   20.85    3.50
   1   5  21    2.19    3.20
   1   5 -21   27.52    3.60
   2   5  21   21.18    3.60
   2   5 -21  109.54    5.20
   3   5  21  153.90    6.10
   3   5 -21   41.48    4.00
   4   5 -21   60.24    4.40
   5   5 -21   61.61    4.50
   0   6  21   21.42    3.80
   1   6  21   36.79    4.10
   1   6 -21   10.41    3.60
   2   6  21  101.22    5.30
   2   6 -21  194.72    6.90
   3   6 -21  209.00    7.10
   4   6  21  109.50    5.50
   5   6  21   63.22    4.70
   6   6  21   70.48    4.90
   7   6  21  291.17    8.90
   7   6 -21  401.24   10.60
   8   6 -21  154.29    6.60
   0   7  21  190.91    7.00
   1   7  21  131.02    6.00
   1   7 -21   22.51    4.00
   2   7 -21   80.47    5.10
   3   7 -21   25.53    4.10
   4   7 -21   51.74    4.60
   5   7 -21  140.59    6.30
   9   7  21  106.64    6.00
   1   8  21   46.60    4.60
   1   8 -21   81.43    5.30
   2   8  21   43.23    4.60
   2   8 -21   64.27    5.00
   3   8  21   46.87    4.70
   3   8 -21   63.21    5.00
   4   8  21   41.22    4.60
   4   8 -21   33.00    4.40
   5   8  21   50.91    4.90
   6   8  21  202.94    7.70
   6   8 -21  168.91    7.10
  10   8  21   52.21    5.10
   0   9  21   64.21    5.20
   1   9  21  125.69    6.30
   7   9 -21   81.87    5.70
   8   9 -21   54.56    5.20
   0  10  21   89.62    5.90
   1  10  21   47.46    5.00
   2  10  21  338.84   10.10
   2  10 -21  101.67    6.10
   3  10  21  103.47    6.10
   5  10  21  160.55    7.20
   5  10 -21  100.86    6.10
   1  11 -21   58.52    5.50
   2  11  21   59.69    5.50
   3  11 -21   84.08    6.00
   4  12  21  130.42    7.10
   0   0  22  129.46    5.00
   1   0  22  193.49    6.10
   1   0 -22  132.52    5.10
   2   0  22    0.00    2.70
   2   0 -22   12.06    3.00
   3   0  22   12.87    3.10
   3   0 -22   -3.43    2.70
   4   0  22  449.49   10.50
   4   0 -22  529.39   11.60
   5   0  22   11.88    3.30
   5   0 -22  903.76   17.50
   6   0  22  139.14    5.80
   6   0 -22   51.44    4.10
   7   0  22  184.85    6.70
   7   0 -22   55.13    4.30
   8   0  22  625.37   13.90
   8   0 -22  132.31    5.80
   9   0  22  168.68    6.70
  10   0  22  117.86    5.90
  10   0 -22  173.33    6.90
  12   0 -22   62.21    5.00
   0   1  22  194.86    6.20
   1   1  22  198.62    6.20
   1   1 -22   -3.20    2.60
   2   1  22   21.21    3.20
   2   1 -22  357.63    8.80
   3   1  22   39.52    3.70
   3   1 -22    3.18    2.90
   4   1  22    1.27    2.90
   4   1 -22   72.67    4.20
   5   1 -22   21.19    3.40
   6   1  22   70.71    4.60
   8   1  22   88.26    5.10
   8   1 -22  165.57    6.40
   9   1 -22   44.15    4.30
  12   1 -22   90.63    5.60
   0   2  22    1.43    2.80
   1   2  22   16.85    3.20
   1   2 -22   19.62    3.20
   2   2  22   40.24    3.70
   2   2 -22   -0.42    2.80
   3   2  22  123.00    5.20
   3   2 -22  122.96    5.10
   4   2  22   -0.87    3.00
   4   2 -22  212.44    6.70
   5   2 -22  383.74    9.50
   6   2  22   67.09    4.50
   6   2 -22  239.12    7.40
   7   2  22  354.65    9.50
   7   2 -22   81.28    4.80
   8   2  22  194.55    7.10
   9   2  22  269.68    8.50
  10   2  22   92.70    5.50
   0   3  22    0.60    3.10
   1   3  22   15.95    3.30
   1   3 -22    5.84    3.20
   2   3  22   75.25    4.40
   2   3 -22  222.96    6.90
   3   3  22    7.53    3.20
   3   3 -22   98.36    4.80
   4   3  22  101.49    5.00
   4   3 -22  267.43    7.70
   5   3 -22   85.48    4.80
   7   3 -22  314.23    8.90
   8   3 -22   82.29    5.00
   0   4  22   -2.91    3.00
   1   4  22   49.20    4.00
   1   4 -22  188.25    6.40
   2   4  22   81.68    4.70
   2   4 -22    1.75    3.10
   3   4 -22  250.59    7.50
   4   4  22   92.54    5.00
   4   4 -22  120.78    5.50
   5   4  22   33.34    4.00
   6   4  22  119.47    5.70
   6   4 -22  488.61   11.60
   7   4  22   68.08    4.80
   7   4 -22  107.61    5.50
   8   4  22  108.98    5.70
   8   4 -22   80.25    5.10
   9   4  22  102.48    5.70
   0   5  22  260.61    7.80
   1   5 -22  160.65    6.20
   2   5  22   49.24    4.20
   3   5  22   18.50    3.60
   4   5 -22   50.28    4.30
   5   5 -22   91.75    5.10
   6   5 -22  609.17   13.70
   7   5 -22   51.33    4.50
   9   5 -22  113.35    5.90
  11   5 -22   67.39    5.20
   0   6  22   87.16    5.10
   1   6  22  112.29    5.50
   1   6 -22   50.87    4.40
   2   6  22  123.74    5.70
   2   6 -22  470.14   11.40
   3   6  22  107.08    5.50
   3   6 -22   54.02    4.50
   4   6  22   75.45    4.90
   5   6  22  227.95    7.70
   5   6 -22   72.10    4.90
   6   6  22   51.99    4.60
   1   7 -22   63.64    4.80
   4   7  22   42.18    4.50
   5   7 -22   69.37    5.10
   6   7  22   50.21    4.80
   6   7 -22  171.98    7.00
   0   8  22  181.83    7.10
   1   8 -22  203.65    7.50
   2   8  22   63.05    5.00
   2   8 -22  150.05    6.60
   3   8  22  184.86    7.30
   4   8  22  171.67    7.10
   5   8  22   95.20    5.80
   6   8 -22   83.67    5.60
   8   8 -22  160.93    7.10
   1   9 -22   52.17    5.00
   4   9 -22  209.90    7.90
   7   9 -22   62.44    5.30
   0  10  22   56.13    5.20
   1  10 -22  264.90    9.00
   3  10  22   85.97    5.80
   4  10  22  106.35    6.30
   5  10 -22   89.88    5.90
   1  11 -22   50.52    5.30
   4  13  22   28.84    5.00
   0   1  23   37.66    3.60
   1   1  23   23.66    3.30
   1   1 -23   85.56    4.40
   2   1  23  159.76    5.80
   2   1 -23   17.46    3.20
   3   1  23  426.83   10.20
   3   1 -23  231.92    7.00
   4   1  23   10.24    3.30
   4   1 -23  216.44    6.80
   6   1  23   39.88    4.00
   6   1 -23   94.18    5.00
   7   1 -23  239.37    7.60
   9   1 -23   65.01    4.80
  10   1  23  124.18    6.10
  11   1 -23   75.90    5.20
  14   1  23   55.58    4.70
   0   2  23   30.76    3.50
   1   2  23   -0.84    2.90
   1   2 -23   30.52    3.50
   2   2  23   -0.04    2.90
   2   2 -23   -2.76    2.80
   3   2  23   17.75    3.40
   3   2 -23  296.02    8.10
   4   2  23  124.78    5.40
   4   2 -23   30.36    3.60
   5   2  23   81.02    4.80
   5   2 -23   61.65    4.30
   7   2  23  132.15    5.90
   9   2  23   60.22    4.80
   9   2 -23   79.50    5.10
  11   2 -23  216.98    7.80
  14   2  23  102.33    5.60
   0   3  23   -1.51    2.90
   1   3  23  383.09    9.50
   1   3 -23   98.83    4.80
   2   3  23   -0.21    3.00
   2   3 -23    1.46    3.10
   3   3 -23   -4.39    3.00
   4   3  23  221.22    7.20
   5   3  23   45.27    4.20
   5   3 -23  306.66    8.60
   6   3 -23   65.38    4.60
   7   3 -23   98.52    5.30
   8   3 -23   62.11    4.70
  10   3 -23  148.06    6.60
  12   3  23  110.35    6.00
   0   4  23   34.78    3.80
   1   4  23   15.00    3.50
   2   4  23   73.64    4.60
   2   4 -23  142.18    5.80
   3   4  23   70.60    4.60
   3   4 -23   31.02    3.80
   4   4  23   87.96    5.00
   4   4 -23  138.35    5.80
   5   4  23   46.09    4.30
   5   4 -23   64.58    4.60
   6   4  23  289.49    8.60
   6   4 -23   64.03    4.70
   8   4 -23   49.82    4.50
  10   4  23  120.48    6.20
  13   4  23   56.23    4.80
   1   5  23   52.72    4.30
   1   5 -23   27.75    3.80
   3   5  23   48.13    4.30
   3   5 -23   29.67    3.90
   5   5  23   68.14    4.80
   5   5 -23  102.36    5.40
   1   6  23  125.74    5.80
   1   6 -23  116.23    5.60
   2   6  23   47.97    4.40
   3   6  23   32.73    4.10
   3   6 -23   93.62    5.20
   4   6 -23   61.58    4.70
   5   6  23  277.11    8.60
   5   6 -23   87.42    5.20
   7   6 -23  285.98    8.90
   9   6  23   68.79    5.20
  12   6  23   91.25    5.70
   1   7  23  164.95    6.70
   3   7  23  137.53    6.30
   4   7  23   86.92    5.40
   5   7 -23  252.52    8.30
   6   7  23   75.53    5.30
   7   7 -23  105.97    5.90
   8   7  23   64.39    5.20
   1   8  23   99.43    5.70
   1   8 -23   43.33    4.70
   2   8 -23   93.64    5.60
   3   8 -23   41.84    4.70
   4   8  23   84.54    5.60
   4   8 -23   47.42    4.80
  11   8  23   64.26    5.00
   1   9 -23   50.11    4.90
   4   9  23   49.35    5.00
   4   9 -23   60.61    5.20
   7   9  23  155.02    7.20
   0  10  23  167.83    7.30
   1  10  23  164.96    7.30
   2  10  23   44.82    5.00
   3  10 -23   63.44    5.40
   0   0  24   -0.93    2.80
   1   0  24  194.05    6.40
   1   0 -24   37.20    3.60
   2   0  24   15.47    3.30
   2   0 -24  857.88   16.80
   3   0  24   17.88    3.40
   3   0 -24    0.22    3.00
   4   0  24   54.36    4.20
   4   0 -24  576.09   12.70
   5   0  24  127.16    5.60
   5   0 -24   85.92    4.80
   6   0  24  108.55    5.40
   7   0 -24  210.29    7.20
   8   0  24  250.01    8.10
  10   0 -24  199.89    7.40
  14   0  24   77.32    5.10
   0   1  24   82.14    4.50
   1   1  24   -2.92    2.80
   1   1 -24    7.09    3.10
   2   1  24   72.96    4.40
   2   1 -24  100.90    4.80
   3   1 -24    2.13    3.00
   4   1  24   70.07    4.50
   4   1 -24   20.67    3.50
  11   1  24  131.10    6.40
   0   2  24   12.52    3.20
   1   2  24    8.84    3.20
   1   2 -24  201.19    6.60
   2   2  24   57.46    4.10
   2   2 -24    2.46    3.00
   4   2  24   99.24    5.10
   5   2  24   58.91    4.40
   5   2 -24  183.97    6.60
   6   2  24   47.75    4.30
   7   2  24  198.07    7.10
   0   3  24   29.92    3.70
   1   3 -24   61.46    4.30
   2   3  24  159.39    6.10
   2   3 -24   38.73    3.90
   3   3  24   29.29    3.80
   4   3  24  179.78    6.60
   5   3  24   36.88    4.10
   6   3  24  110.97    5.50
   6   3 -24   37.14    4.10
  10   3  24  143.47    6.60
  11   3  24  108.34    6.00
   0   4  24  281.23    8.20
   1   4 -24   85.71    4.90
   2   4  24   71.44    4.70
   2   4 -24  125.60    5.60
   3   4  24  224.45    7.40
   3   4 -24   33.06    3.90
   4   4 -24  103.24    5.30
   5   4  24   38.81    4.20
   5   4 -24  127.59    5.80
   6   4  24  108.68    5.60
   6   4 -24  149.64    6.30
  10   4 -24   92.32    5.60
  12   4  24   85.02    5.50
   0   5  24   98.95    5.20
   1   5  24   42.30    4.20
   2   5  24  142.33    6.00
   4   5 -24   74.93    4.90
   5   5  24  286.58    8.70
   6   5 -24   61.12    4.80
   7   5  24   65.05    5.00
   9   5  24  203.94    7.70
  12   5  24   85.60    5.60
   1   6  24  194.92    7.10
   2   6  24   58.63    4.60
   2   6 -24   86.41    5.20
   3   6  24   72.02    5.00
   4   6  24   63.24    4.80
   4   6 -24   38.27    4.30
   9   6 -24   71.92    5.30
   0   7  24  107.60    5.70
   2   7 -24   42.48    4.50
   6   7  24   96.68    5.80
   7   7  24   55.70    5.00
   1   8  24  154.86    6.80
   2   8  24  105.78    5.90
   2   8 -24   44.03    4.70
   4   8  24  106.92    6.00
   6   8  24   56.03    5.10
   6   8 -24   68.85    5.30
   0   9  24   56.48    5.10
   2   9  24   91.32    5.80
   9   9  24   55.54    5.00
   2  10 -24   44.25    5.00
   3  10  24   66.74    5.50
   6  11  24   92.67    6.00
   1   1 -25   27.74    3.60
   2   1 -25   27.20    3.60
   3   1  25   44.72    4.10
   3   1 -25   27.70    3.70
   4   1  25   57.35    4.40
   4   1 -25  141.97    5.80
   5   1  25  106.27    5.40
   6   1  25  350.18    9.60
   7   1  25  153.18    6.40
   8   1  25  134.79    6.20
   9   1  25  180.22    7.10
  12   1  25   95.37    5.70
   0   2  25  234.89    7.30
   1   2 -25   86.32    4.80
   3   2  25   88.76    4.90
   3   2 -25  374.21    9.60
   4   2 -25   72.86    4.60
   5   2 -25  126.35    5.70
   6   2 -25   71.37    4.70
   8   2 -25   94.05    5.40
   9   2  25   98.61    5.70
   9   2 -25   56.04    4.80
  11   2 -25   71.26    5.20
  13   2  25   74.30    5.10
   1   3 -25  114.56    5.40
   2   3  25   32.14    3.90
   3   3 -25  103.95    5.20
   4   3  25  112.04    5.50
   4   3 -25   61.68    4.50
   7   3  25  239.30    8.00
   8   3  25  139.04    6.40
  11   3 -25   83.01    5.50
   1   4  25   78.06    4.80
   1   4 -25   90.62    5.00
   2   4  25   42.79    4.20
   2   4 -25   65.90    4.60
   4   4 -25   42.94    4.30
  11   4  25   71.34    5.30
   0   5  25   97.02    5.30
   1   5  25   58.02    4.60
   3   5  25  120.90    5.80
   8   5  25   64.56    5.10
  11   5  25   73.94    5.40
   1   6 -25  185.35    7.00
   2   6  25   91.54    5.40
   4   6 -25   53.45    4.70
   5   6 -25  113.15    5.90
   7   6 -25  122.08    6.20
   8   6  25   66.09    5.20
  11   6  25  152.08    6.80
   1   7  25   43.90    4.50
   2   7  25   77.00    5.30
   8   7  25  164.88    7.20
  10   7  25   55.08    5.00
   0   8  25   86.01    5.60
   2   8 -25   47.93    4.80
   3   8 -25   98.96    5.90
  10   8  25   68.31    5.10
   1   9  25   57.51    5.20
   1   9 -25   84.81    5.70
   7   9  25  139.00    6.70
   8   9  25   65.24    5.20
   6  10  25   56.82    5.40
   6  11  25   53.35    5.20
   1   0  26   80.08    4.70
   2   0  26  215.08    7.10
   3   0  26   84.73    4.90
   3   0 -26   64.94    4.50
   4   0  26   45.92    4.20
   4   0 -26  201.51    7.00
   5   0  26  121.13    5.70
   7   0  26   63.57    4.80
   8   0  26   62.00    4.90
   9   0 -26  148.16    6.50
  10   0 -26   73.52    5.20
   2   1  26   47.21    4.10
   2   1 -26   45.16    4.10
   3   1  26  203.65    7.00
   3   1 -26  200.25    6.90
   5   1  26  451.68   11.20
   5   1 -26   50.23    4.30
   6   1  26  142.90    6.20
   9   1  26   65.85    5.00
   1   2  26   70.91    4.60
   2   2  26   96.54    5.10
   3   2  26   66.30    4.60
   3   2 -26   46.96    4.20
   4   2  26   63.80    4.60
   1   3 -26   41.06    4.10
   2   3  26   34.23    4.00
   3   3 -26   95.01    5.20
   4   3  26  153.23    6.30
   4   3 -26   84.73    5.00
   5   3  26  190.56    7.00
   7   3  26   70.92    5.00
   9   3  26   73.71    5.20
  10   3  26  218.15    8.00
   0   4  26   52.55    4.40
   3   4  26   55.69    4.60
   6   4 -26   85.08    5.30
   8   4 -26   69.81    5.10
   9   4 -26   95.45    5.70
   1   5  26  144.42    6.20
   2   5 -26   45.10    4.40
   3   5  26  236.35    7.90
   5   5 -26   60.50    4.80
   6   5  26  160.31    6.80
   8   5  26  287.00    9.10
   9   5  26  155.63    6.90
  10   5  26   60.47    5.20
   3   6  26   57.62    4.80
   1   7  26  127.34    6.20
   9   7  26   97.06    5.90
   2   8 -26   47.16    4.80
   5   8 -26   61.76    5.20
  10   8  26   49.46    4.70
   3   9  26   97.01    6.00
   1   1 -27  233.86    7.50
   2   1  27   57.62    4.40
   2   1 -27  534.47   12.30
   3   1  27   38.01    4.10
   3   1 -27   60.63    4.50
   4   1  27  185.48    6.80
   5   1  27   89.51    5.20
   6   1  27  230.10    7.80
  10   1  27   76.73    5.40
  10   1 -27   89.93    5.60
  11   1  27  115.75    6.10
  12   1  27  128.71    6.20
   1   2  27   79.83    4.80
   1   2 -27  215.30    7.20
   2   2 -27  189.06    6.80
   3   2  27  198.81    7.10
   5   2  27   71.21    4.90
   6   2  27  131.74    6.10
   0   3  27  226.61    7.50
   1   3 -27   74.55    4.80
   2   3  27  180.69    6.80
   3   3 -27  184.35    6.80
   4   3  27  178.82    6.80
   4   3 -27  105.34    5.50
   6   3  27   56.50    4.70
   7   3  27  154.39    6.70
   9   3 -27   86.01    5.50
   0   4  27  245.42    7.90
   1   4 -27   94.32    5.30
   2   4  27   48.13    4.40
   2   4 -27  196.46    7.10
   3   4 -27  100.18    5.40
   4   4  27  253.31    8.20
   5   4  27  112.37    5.80
   7   4  27   57.33    4.80
   0   5  27  134.27    6.10
   2   5  27   81.88    5.20
   4   5 -27   46.36    4.50
   5   5 -27  184.29    7.20
   8   5 -27   98.47    5.80
   0   6  27  210.82    7.60
   1   6 -27  158.91    6.70
   3   6  27   53.30    4.80
   3   6 -27  169.89    6.90
   4   6  27  211.11    7.70
   0   7  27  185.00    7.30
   2   7  27  241.70    8.30
   4   7  27   76.89    5.40
   4   7 -27   58.62    5.00
   5   7 -27   92.21    5.70
   6   7 -27  118.92    6.30
   7   7  27  148.55    6.90
   7   7 -27  162.99    7.10
   2   8 -27   92.32    5.80
   4   8 -27   62.45    5.20
   5   8  27   77.50    5.60
   2   9  27   84.41    5.80
   7   9  27   57.93    5.00
   4  11  27   80.55    5.70
   5  11  27   61.11    5.30
   0   0  28  806.96   16.60
   1   0  28  208.39    7.20
   1   0 -28  326.64    9.10
   2   0  28  560.81   12.90
   3   0  28  283.74    8.50
   3   0 -28   47.32    4.30
   4   0 -28   55.35    4.50
   6   0  28   59.39    4.80
   6   0 -28   85.68    5.20
   7   0  28   83.81    5.30
  12   0  28  225.52    7.80
   1   1  28   61.91    4.60
   1   1 -28  199.26    7.00
   3   1  28   71.13    4.80
   3   1 -28  104.16    5.40
   5   1  28   49.49    4.50
   0   2  28  153.39    6.30
   1   2  28  585.52   13.30
   1   2 -28  182.44    6.80
   2   2  28  283.96    8.50
   4   2  28   49.03    4.40
   5   2 -28   72.01    4.90
   0   3  28  100.87    5.40
   1   3 -28  245.29    7.90
   2   3  28   60.21    4.60
   3   3 -28   86.59    5.20
   4   3 -28   66.62    4.80
   5   3 -28   64.08    4.80
   7   3  28  103.19    5.80
   9   3 -28  143.02    6.60
   0   4  28   92.44    5.30
   1   4  28  156.55    6.50
   2   4 -28   65.73    4.80
   3   4  28   48.41    4.50
   3   4 -28   62.84    4.80
   4   4 -28   61.35    4.80
  10   4  28   65.47    5.10
   0   5  28   87.65    5.30
   1   5  28  507.28   12.40
   1   5 -28   56.28    4.70
   2   5 -28   91.29    5.40
   4   5 -28  200.40    7.50
   8   5 -28   96.65    5.80
   9   5  28  121.87    6.30
   5   6  28   65.20    5.20
   1   7  28   90.49    5.60
   5   7 -28   58.44    5.10
   0   8  28  100.84    6.00
   1   8  28   63.91    5.30
   4   8 -28  139.37    6.70
   5   8  28   84.33    5.70
   6   8  28   80.85    5.60
   5  10  28   71.74    5.50
   6  10  28   54.47    5.20
   3  11  28   40.12    4.90
   0   1  29   87.14    5.10
   1   1  29   54.33    4.50
   2   1 -29  168.77    6.60
   3   1  29   53.76    4.50
   3   1 -29   51.66    4.50
   4   1  29   69.50    4.90
   1   2  29  193.59    7.10
   1   2 -29   91.34    5.20
   2   2 -29   61.48    4.70
   3   2  29  131.50    6.10
   3   2 -29   53.97    4.50
   4   2  29  268.59    8.50
   7   2 -29  112.75    5.90
   8   2  29   66.29    5.10
   9   2  29   78.84    5.40
   9   2 -29   62.13    5.10
  12   2  29   56.75    4.70
   2   3  29  152.14    6.40
   4   3 -29   71.40    5.00
   8   3 -29   59.94    5.00
   2   4  29  501.05   12.30
   2   4 -29  216.76    7.60
   3   4  29  263.33    8.50
   4   4  29   65.87    5.00
   4   4 -29   54.46    4.70
   5   4  29  132.57    6.30
   1   5 -29   53.25    4.70
   2   5 -29  139.39    6.40
   8   5  29   98.12    6.00
   1   6  29   70.60    5.20
   2   6  29  186.99    7.40
   3   6  29  293.43    9.20
   3   6 -29  135.04    6.40
   4   6  29   69.15    5.20
   4   6 -29   72.27    5.30
   5   6  29   63.64    5.20
   7   6  29   88.35    5.80
   9   6  29   60.06    5.10
  10   6  29   57.90    4.90
   0   7  29  191.30    7.50
   3   7 -29  120.63    6.30
   1   8  29   55.13    5.10
   4   8  29  152.44    7.00
   7   8  29   80.14    5.40
   6  10  29   36.91    4.50
   0   0  30  546.57   12.80
   1   0 -30  204.79    7.30
   2   0 -30  177.35    6.80
   3   0 -30   62.39    4.70
   4   0  30  461.34   11.70
   5   0  30  383.53   10.50
   5   0 -30  106.45    5.70
   7   0  30  219.08    7.90
   8   0  30  172.56    7.10
   8   0 -30  207.55    7.70
  11   0  30   85.90    5.30
   2   1  30   64.44    4.80
   2   1 -30   98.30    5.40
   4   1 -30   58.13    4.70
   5   1 -30  123.82    6.00
   7   1 -30   78.99    5.30
   0   2  30  107.31    5.60
   1   2  30  113.69    5.70
   1   2 -30  263.22    8.30
   2   2 -30  126.87    6.00
   3   2  30   94.65    5.50
   3   2 -30   56.95    4.70
   4   2  30   78.43    5.20
   4   2 -30   56.66    4.70
   5   2  30  163.88    6.80
   6   2  30  173.30    7.10
   6   2 -30   59.09    4.90
   7   2 -30   70.05    5.20
   0   3  30   58.86    4.70
   1   3 -30  106.83    5.70
   6   3  30   98.51    5.70
   7   3 -30   92.28    5.60
   2   4 -30   83.00    5.30
   3   4 -30  104.54    5.70
   6   4  30  264.99    8.70
   6   4 -30   69.03    5.20
   9   4  30  201.01    7.60
  10   4  30   64.86    5.00
   1   5 -30   67.31    5.10
   2   5  30   75.07    5.20
   5   5 -30  147.92    6.70
   4   6 -30   76.84    5.40
   5   6 -30   67.91    5.30
   8   6  30  113.11    6.10
   7   7  30   71.15    5.30
   8   8  30   80.59    5.30
   5  10  30   60.77    5.00
   1   1  31   57.20    4.70
   4   1  31   70.76    5.10
   6   1 -31   87.94    5.50
   0   2  31   61.69    4.80
   0   3  31   54.36    4.70
   1   3  31  100.02    5.60
   3   3  31  118.03    6.00
   3   3 -31   66.34    5.00
   4   3 -31   58.37    4.80
   6   3 -31   88.88    5.50
   9   3  31  140.89    6.50
  11   3  31   68.69    4.90
   1   4  31  149.68    6.60
   2   4  31   94.63    5.60
   5   5  31  112.02    6.10
   0   6  31   63.15    5.10
   1   6  31  104.82    5.90
   2   6  31   59.24    5.10
   7   6  31   66.62    5.30
   3   7  31  141.75    6.80
   3   9  31   52.38    4.90
   0   0  32   67.53    5.00
   1   0  32   81.67    5.30
   3   0  32  301.25    9.20
   4   0  32  103.94    5.80
   6   0  32   77.12    5.30
   6   0 -32  116.61    6.10
   2   2  32  118.68    6.00
   5   2  32   80.54    5.40
   6   3  32  212.32    7.90
   2   4  32   64.35    5.10
   5   4  32   70.13    5.30
   2   5  32   63.18    5.10
   4   5  32   63.59    5.30
   7   5  32   60.09    5.20
   8   5  32   85.72    5.60
   6   6  32   60.88    5.20
   3   1 -33  205.52    7.60
   4   1 -33   66.98    5.10
   5   1  33  141.99    6.60
   7   1  33  116.83    6.10
   2   2 -33   66.97    5.10
   4   2  33   66.88    5.10
   5   2 -33   80.47    5.40
   4   3  33   75.63    5.30
   5   3 -33   81.01    5.40
   3   4 -33   87.48    5.60
   4   4 -33   71.68    5.30
   7   5  33   58.20    5.10
   4   7  33   54.59    5.00
   1   0 -34  267.65    8.70
   4   0 -34  102.32    5.80
   5   0 -34   83.44    5.50
   2   1 -34   94.06    5.60
   2   3 -34  201.82    7.70
   3   3 -34   67.88    5.10
   6   3  34  124.72    6.30
   3   8  34   48.30    4.70
   1   1 -35   81.27    5.40
   8   1  35   62.14    4.90
   4   2  35   68.61    5.20
   5   6  35   60.93    5.00
   4   0  36  132.66    6.40
   5   0  36   90.44    5.60
   6   0  36   57.95    4.90
   5   2  36   89.87    5.60
   7   2  36   52.08    4.70
   3   4  36   74.49    5.30
   6   4  36   68.88    5.00
   3   6  36   56.11    4.90
   3   2  37  109.32    5.90
   4   0  38   76.93    5.20
   3   5  38  168.20    6.70
   0   0   0    0.00    0.00
;
_shelx_hkl_checksum   68573
