# Supplementary material
Source: MDPI journal article supplement (https://www.mdpi.com/2073-4352/10/10/894)
Supplement: s1 [file s1 › Readme.txt]

Content of the compressed archive (Destro_et_al.zip):
- PLATON checkcif report for the two deposited structures
  SQ1820: Anhydrous squaraine
  SQDH2020: Dihydrated squaraine
- Deposited .cif file (Destro_et_al.cif), with low-T coordinates and thermal
  motion parameters 
- Multipole parameters for anhydrous (SQ) and dihydrate (SQDH) squaraine,
  Multipole_parameters_SQ.doc and Multipole_parameters_SQDH.doc
  See Stewart, R.F.; Spackman, M.A.; Flensburg, C. VALRAY User's Manual v2.1, 
  Carnegie Mellon University & University of Copenhagen, 2000 for the meaning
  of the various entries.

Note:
CCDC 2020258 and CCDC 2020259 entries contain the supplementary crystallographic data, 
respectively for SQ and SQDH. The data can be obtained free of charge from The 
Cambridge Crystallographic Data Centre via www.ccdc.cam.ac.uk/structures.
